# Supplementary material for: Does Bentonite Cause Cytotoxic and Whole-Transcriptomic Adverse Effects in Enterocytes When Used to Reduce Aflatoxin B1 Exposure?
Source: MDPI journal article supplement (doi:10.3390/toxins14070435), 2022-06-26
Supplement: s1 [file s1]

## Supplementary materials

# Does Bentonite Cause Cytotoxic and Whole-Transcriptomic Adverse Effects in Enterocytes When Used to Reduce Aflatoxin B1 Exposure?

Greta Mucignat <sup>1,§</sup>, Irene Bassan <sup>1,§</sup>, Mery Giantin <sup>1</sup>, Marianna Pauletto <sup>1</sup>, Anisa Bardhi <sup>2</sup>, Silvia Iori <sup>1</sup>, Rosa M. Lopparelli <sup>1</sup>, Andrea Barbarossa <sup>2</sup>, Anna Zaghini <sup>2</sup>, Enrico Novelli <sup>1</sup> and Mauro Dacasto <sup>1,\*</sup>

<sup>1</sup> Department of Comparative Biomedicine and Food Science, University of Padua, viale dell'Università 16, I-35020 Agripolis Legnaro (Padua), Italy; greta.mucignat@unipd.it (G.M.); irene.bassan@unipd.it (I.B.); mery.giantin@unipd.it (M.G.); marianna.pauletto@unipd.it (M.P.); silvia.iori@phd.unipd.it (S.I.); rosa.lopparelli@unipd.it (R.M.L.); enrico.novelli@unipd.it (E.N.)

<sup>2</sup> Department of Veterinary Medical Sciences, *Alma Mater Studiorum* University of Bologna, via Tolara di Sopra 50, I-40064 Ozzano dell'Emilia (Bologna), Italy; anisa.bardhi@unibo.it (A.B.); andrea.barbarossa@unibo.it (A.B.); anna.zaghini@unibo.it (A.Z.)

\* Correspondence: mauro.dacasto@unipd.it (M.D.); Tel.: +39-049-827-2935

§ These authors contributed equally to this work

## FIGURES

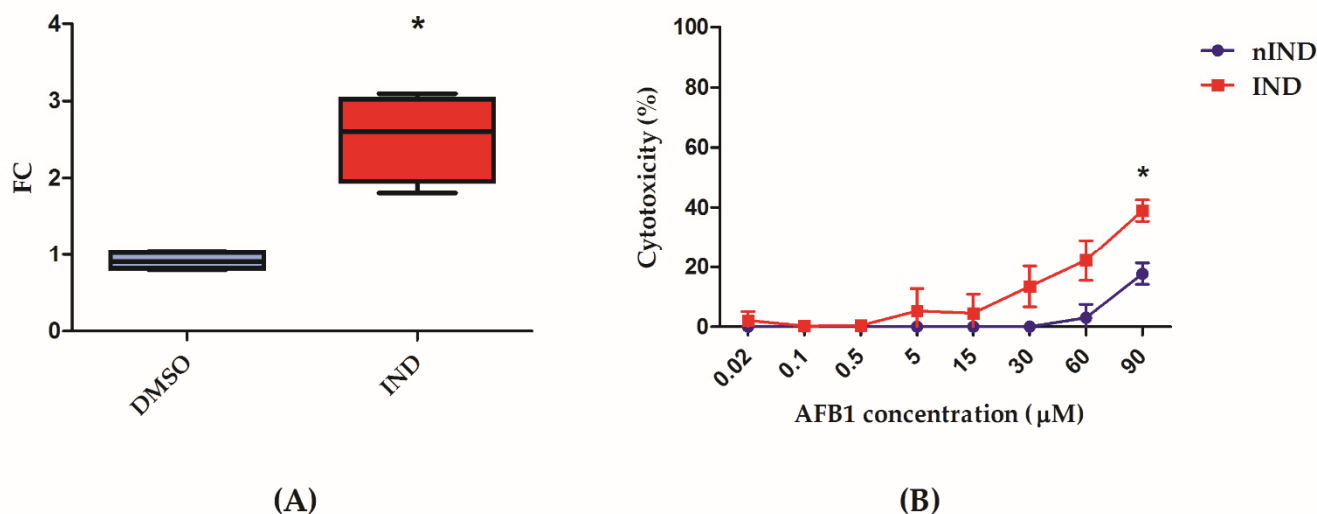

**Figure S1.** Effects of the cytochrome P450 3A4 (CYP3A4) induction protocol (see section 5.3. of Materials and Methods), on differentiated Caco-2 cells. **(A)** Basal CYP3A4 mRNA levels (quantitative real-time PCR) in dimethylsulfoxide (DMSO) or induced (IND) Caco-2 cells. **(B)** Aflatoxin B1 (AFB1) cytotoxicity (WST-1) in non-induced (nIND, blue) and IND (red) Caco-2 cells. Cells were exposed to increasing concentrations of AFB1 for 48 h. Data are expressed as mean Fold Change (FC)  $\pm$  mean standard error (SEM) of two independent cell culture experiments, each one run in sextuplicate. \*:  $P < 0.05$  (Mann-Whitney U-test).

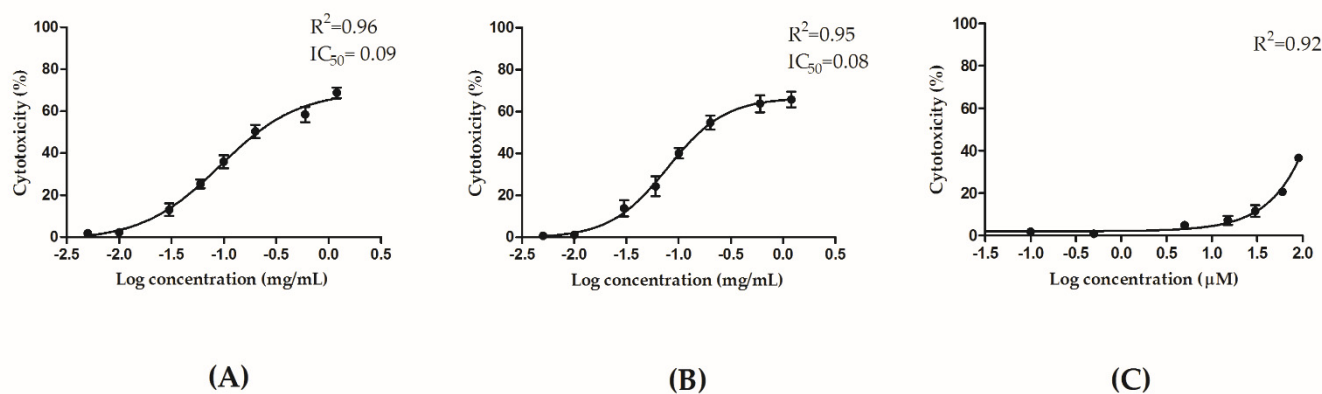

**Figure S2.** Dose-response curves of bentonite (BEN; **A**, **B**) and aflatoxin B1 (AFB1; **C**) in differentiated Caco-2 cells after 48 h of incubation. As to BEN, cells were previously induced (IND, **A**) or non-induced (nIND, **B**) by using the protocol mentioned in section 5.3. of Materials and Methods. However, only IND cells were used to assess the AFB1 cytotoxicity (**C**). The corresponding half-maximal inhibitory concentration ( $IC_{50}$ ) and  $R^2$  are reported, too. Data are expressed as the mean cytotoxicity rate  $\pm$  mean standard error (SEM) of four independent cell culture experiments, each one run in sextuplicate.

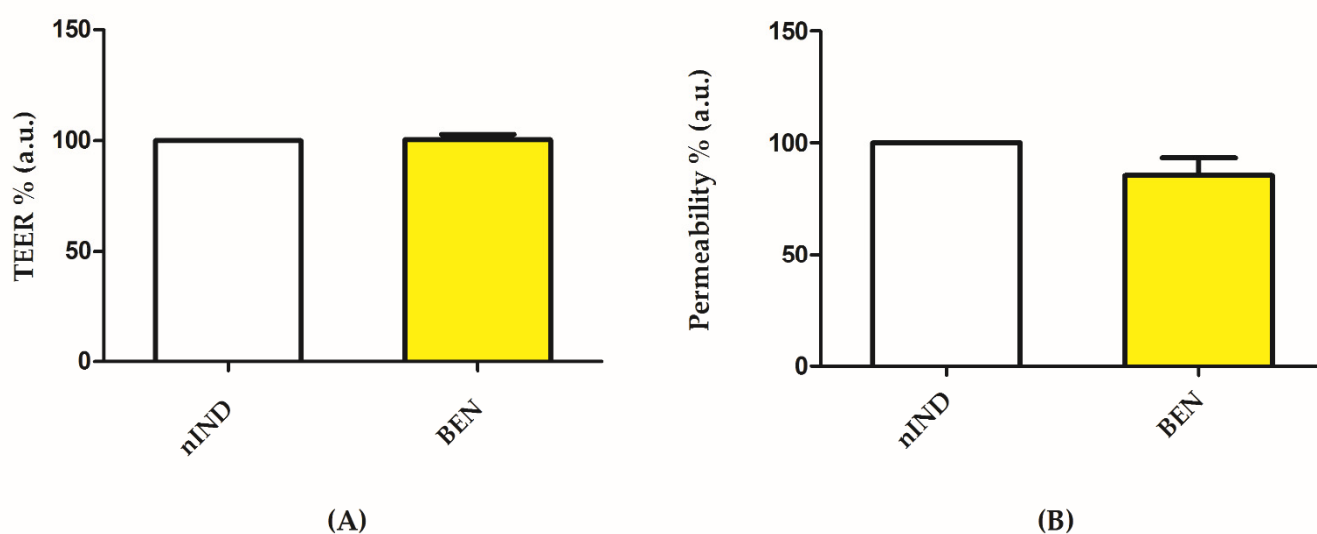

**Figure S3.** Effect of 0.1 mg/mL bentonite (BEN) on trans-epithelial electrical resistance (TEER, **A**) and Lucifer Yellow (LY) dye paracellular permeability (**B**) in not induced (nIND) Caco-2 cells. Data (five independent cell culture experiments, each one run in duplicate) are reported as mean percentage  $\pm$  mean standard error (SEM) of control cells (nIND), whose value was set at 100%.

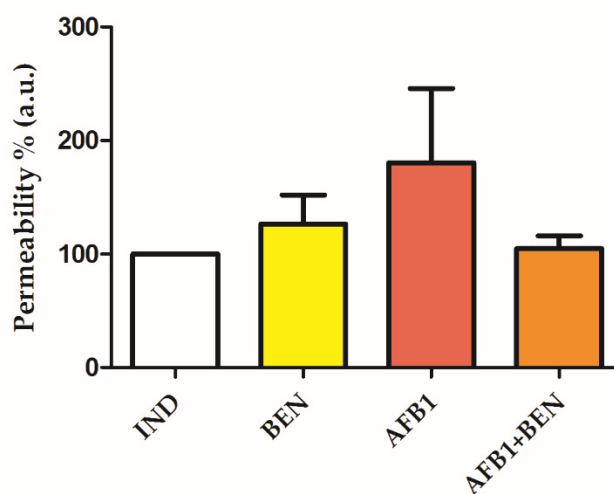

**Figure S4.** Effect of 0.1 mg/mL bentonite (BEN), aflatoxin B1 (AFB1, and the combination AFB1+BEN on the Lucifer Yellow (LY) dye uptake in cytochrome P450 3A4 (CYP3A4)-induced Caco-2 cells (IND). Data (five independent cell culture experiments, each one run in duplicate) are reported as mean percentage  $\pm$  mean standard error (SEM) of control cells (IND), whose value was set at 100%.

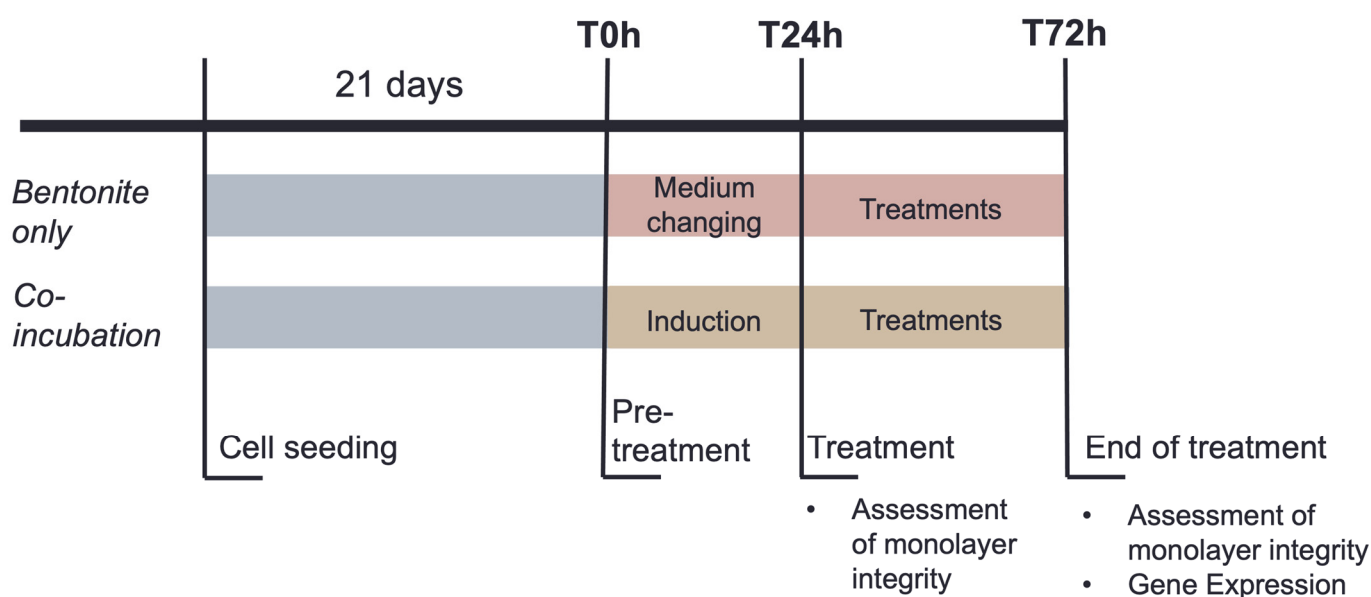

**Figure S5.** Scheme of the experimental design for TEER evaluation.

## TABLES

**Table S1.** Bentonite (BEN) adsorbing capacity toward aflatoxin B1 (AFB1), AFM1 and aflatoxinol (AFL) (A), and its effects on AFB1, AFM1 and AFL transport rate (B). Induced (IND) Caco-2 cells, cultivated in inserts, were exposed either to 0.1 mg/mL BEN with 81  $\mu$ M AFB1 (AFB1+BEN) or to 81  $\mu$ M AFB1 (AFB1). After 48 h of incubation at 37°C, AFB1, AFM1 and AFL amounts were measured using set up and validated LC-MS/MS protocols. In (A), the percentages of total free analytes present in medium containing AFB1+BEN (AFB1+BEN) are compared to those detected in the medium containing only AFB1 (AFB1). In (B), the percentages of total free analytes that passed into the basolateral compartment (considering negligible the amount of analytes accumulating in the cell) are reported. IND cells were exposed to the combination AFB1+BEN, and the total free analyte (AFB1 amount not adsorbed by BEN) was quantified. Data are reported as mean percentage  $\pm$  mean standard error (SEM) of (five independent cell culture experiments, each one run in duplicate).

| A | Adsorbance        |              |              |              |              |              |
|---|-------------------|--------------|--------------|--------------|--------------|--------------|
|   | (AFB1+BEN) / AFB1 |              |              |              |              |              |
|   | AFB1              |              | AFM1         |              | AFL          |              |
|   | 57.6% ± 2.7%      |              | 65.2% ± 2.5% |              | 50.3% ± 2.4% |              |
| B | Transport rate    |              |              |              |              |              |
|   | AFB1              |              | AFM1         |              | AFL          |              |
|   | AFB1              | AFB1+BEN     | AFB1         | AFB1+BEN     | AFB1         | AFB1+BEN     |
|   | 44.0% ± 0.7%      | 44.3% ± 0.5% | 28.7% ± 2.3% | 26.3% ± 1.7% | 45.0% ± 1.6% | 45.5% ± 1.0% |

**Table S2.** Sequencing and mapping results. The table reports the sequenced RNA-seq libraries, including for each of them: i) the number of raw reads obtained; ii) the number of reads after trimming; iii) the number of mapped reads and the corresponding percentage.

| Sample      | Nr. raw reads | Nr. reads after trimming | Nr. reads mapping | % of reads mapping |
|-------------|---------------|--------------------------|-------------------|--------------------|
| nIND_1      | 38,753,412    | 38,747,397               | 34,202,477        | 88.27%             |
| nIND_2      | 34,556,667    | 34,551,831               | 30,595,113        | 88.55%             |
| nIND_3      | 34,880,649    | 34,876,370               | 30,875,497        | 88.53%             |
| nIND_4      | 30,730,396    | 30,725,991               | 27,165,512        | 88.41%             |
| BEN_1       | 34,875,341    | 34,869,049               | 30,801,753        | 88.34%             |
| BEN_2       | 34,064,315    | 34,059,671               | 29,943,504        | 87.91%             |
| BEN_3       | 32,400,296    | 32,394,135               | 28,498,424        | 87.97%             |
| BEN_4       | 33,908,517    | 33,903,416               | 30,114,514        | 88.82%             |
| DMSO_1      | 76,293,408    | 76,278,463               | 66,969,400        | 87.80%             |
| DMSO_2      | 30,358,539    | 30,354,031               | 26,877,467        | 88.55%             |
| DMSO_4      | 32,428,381    | 32,421,823               | 28,622,990        | 88.28%             |
| IND_1       | 36,152,588    | 36,142,004               | 31,934,024        | 88.36%             |
| IND_2       | 33,948,084    | 33,937,041               | 30,243,757        | 89.12%             |
| IND_3       | 33,591,422    | 33,575,594               | 29,847,251        | 88.90%             |
| IND_4       | 31,528,849    | 31,517,526               | 28,170,407        | 89.38%             |
| AFB1_1      | 30,707,453    | 30,701,594               | 27,088,357        | 88.23%             |
| AFB1_2      | 32,188,544    | 32,182,449               | 28,594,762        | 88.85%             |
| AFB1_3      | 30,036,340    | 30,031,458               | 26,945,481        | 89.72%             |
| AFB1_4      | 27,952,248    | 27,946,192               | 25,204,321        | 90.19%             |
| BEN_IND_1   | 30,236,385    | 30,230,200               | 26,888,452        | 88.95%             |
| BEN_IND_2   | 31,085,810    | 31,080,715               | 27,647,275        | 88.95%             |
| BEN_IND_3   | 31,595,350    | 31,590,298               | 28,267,300        | 89.48%             |
| BEN_IND_4   | 32,653,312    | 32,647,356               | 28,982,635        | 88.77%             |
| AFB1+BEN_2  | 32,334,463    | 32,327,980               | 28,924,394        | 89.47%             |
| AFB1+BEN_3  | 38,562,827    | 38,552,898               | 34,663,550        | 89.91%             |
| AFB1+BEN_4  | 32,091,773    | 32,084,972               | 28,901,722        | 90.08%             |
| <b>Mean</b> | 34,535,207    | 34,528,094               | 30,652,705        | 88.84%             |

**Table S7.** Target genes and primers used for the quantitative real-time quantitative PCR analysis.

| Target gene   | Forward primer                  | Reverse primer                | Reference |
|---------------|---------------------------------|-------------------------------|-----------|
| <i>CYP3A4</i> | 5'-CATTCCTCATCCCAATTCTTGAAGT-3' | 5'-CCACTCGGTGCTTTTGTGTATCT-3' | [53]      |
| <i>GAPDH</i>  | 5'-CTCTGCTCCTCCTGTTTCGAC-3'     | 5'-ACGACCAAATCCGTTGACTC-3'    | [125]     |
