# Supplementary material for: Does Bentonite Cause Cytotoxic and Whole-Transcriptomic Adverse Effects in Enterocytes When Used to Reduce Aflatoxin B1 Exposure?
Source: Toxins (Basel). 2022 Jun 26;14(7):435. doi: 10.3390/toxins14070435 (PMC9322703; doi:10.3390/toxins14070435)
Supplement: Supplementary file 1 [file toxins-14-00435-s001.zip]

Archive with 6 entries (6 files):
- Mucignat & Bassan - SplOnline File S1 Rscript.pdf
- Mucignat & Bassan - SplOnline Table S3 Differential Expression analysis.xlsx
- Mucignat & Bassan - SplOnline Table S4 GO enrichment analysis.xlsx
- Mucignat & Bassan - SplOnline Table S5 KEGG enrichment analysis.xlsx
- Mucignat & Bassan - SplOnline Table S6 GO GSEA Gene Set Enrichment Analysis.xlsx
- Mucignat & Bassan - SplOnline.pdf
