# Supplementary material for: Does Bentonite Cause Cytotoxic and Whole-Transcriptomic Adverse Effects in Enterocytes When Used to Reduce Aflatoxin B1 Exposure?
Source: Toxins (Basel). 2022 Jun 26;14(7):435. doi: 10.3390/toxins14070435 (PMC9322703; doi:10.3390/toxins14070435)
Supplement: Supplementary file 1 [file toxins-14-00435-s001.zip › Mucignat & Bassan - SplOnline Table S3 Differential Expression analysis.xlsx]

## Sheet: AFB1+BEN vs AFB1
GENE ID	GENE SYMBOL	GENE DESCRIPTION	logFC	logCPM	PValue	FDR	Up/Down-regulated
ENSG00000023171	GRAMD1B	GRAM domain containing 1B [Source:HGNC Symbol;Acc:HGNC:29214]	2.42581	7.35633	2.52512e-16	4.56037e-12	Up-regulated
ENSG00000106078	COBL	cordon-bleu WH2 repeat protein [Source:HGNC Symbol;Acc:HGNC:22199]	1.68637	6.38705	2.01291e-14	1.81766e-10	Up-regulated
ENSG00000174992	ZG16	zymogen granule protein 16 [Source:HGNC Symbol;Acc:HGNC:30961]	1.771	7.13214	3.36398e-14	2.02512e-10	Up-regulated
ENSG00000136828	RALGPS1	Ral GEF with PH domain and SH3 binding motif 1 [Source:HGNC Symbol;Acc:HGNC:16851]	1.69584	6.4675	4.94709e-14	2.23361e-10	Up-regulated
ENSG00000138193	PLCE1	phospholipase C epsilon 1 [Source:HGNC Symbol;Acc:HGNC:17175]	2.2021	6.22078	1.11232e-13	4.01768e-10	Up-regulated
ENSG00000196405	EVL	Enah/Vasp-like [Source:HGNC Symbol;Acc:HGNC:20234]	2.63267	4.39648	1.46901e-13	4.42172e-10	Up-regulated
ENSG00000119711	ALDH6A1	aldehyde dehydrogenase 6 family member A1 [Source:HGNC Symbol;Acc:HGNC:7179]	1.54735	6.77994	2.79518e-13	7.21155e-10	Up-regulated
ENSG00000146416	AIG1	androgen induced 1 [Source:HGNC Symbol;Acc:HGNC:21607]	1.28607	7.13146	3.52465e-13	7.48089e-10	Up-regulated
ENSG00000167323	STIM1	stromal interaction molecule 1 [Source:HGNC Symbol;Acc:HGNC:11386]	1.4438	6.6048	3.8731e-13	7.48089e-10	Up-regulated
ENSG00000153815	CMIP	c-Maf inducing protein [Source:HGNC Symbol;Acc:HGNC:24319]	1.51301	6.77319	4.31982e-13	7.48089e-10	Up-regulated
ENSG00000101096	NFATC2	nuclear factor of activated T cells 2 [Source:HGNC Symbol;Acc:HGNC:7776]	1.68539	5.78093	5.15189e-13	7.48089e-10	Up-regulated
ENSG00000173406	DAB1	DAB adaptor protein 1 [Source:HGNC Symbol;Acc:HGNC:2661]	2.92434	4.6201	5.29141e-13	7.48089e-10	Up-regulated
ENSG00000137266	SLC22A23	solute carrier family 22 member 23 [Source:HGNC Symbol;Acc:HGNC:21106]	1.47727	5.71872	5.38492e-13	7.48089e-10	Up-regulated
ENSG00000157388	CACNA1D	calcium voltage-gated channel subunit alpha1 D [Source:HGNC Symbol;Acc:HGNC:1391]	2.32894	5.62703	7.21752e-13	9.3106e-10	Up-regulated
ENSG00000171105	INSR	insulin receptor [Source:HGNC Symbol;Acc:HGNC:6091]	1.28694	6.72815	7.76092e-13	9.34414e-10	Up-regulated
ENSG00000140284	SLC27A2	solute carrier family 27 member 2 [Source:HGNC Symbol;Acc:HGNC:10996]	1.90024	6.66606	1.0404e-12	1.17435e-09	Up-regulated
ENSG00000138162	TACC2	transforming acidic coiled-coil containing protein 2 [Source:HGNC Symbol;Acc:HGNC:11523]	1.26552	7.18081	1.45882e-12	1.54978e-09	Up-regulated
ENSG00000107745	MICU1	mitochondrial calcium uptake 1 [Source:HGNC Symbol;Acc:HGNC:1530]	1.29533	6.59114	1.55817e-12	1.56337e-09	Up-regulated
ENSG00000179242	CDH4	cadherin 4 [Source:HGNC Symbol;Acc:HGNC:1763]	3.13633	4.10423	2.12819e-12	1.90344e-09	Up-regulated
ENSG00000249948	GBA3	glucosylceramidase beta 3 (gene/pseudogene) [Source:HGNC Symbol;Acc:HGNC:19069]	2.78877	5.21622	2.27342e-12	1.90344e-09	Up-regulated
ENSG00000054793	ATP9A	ATPase phospholipid transporting 9A (putative) [Source:HGNC Symbol;Acc:HGNC:13540]	1.32665	7.12692	2.39403e-12	1.90344e-09	Up-regulated
ENSG00000172164	SNTB1	syntrophin beta 1 [Source:HGNC Symbol;Acc:HGNC:11168]	1.64635	6.2799	2.41135e-12	1.90344e-09	Up-regulated
ENSG00000110911	SLC11A2	solute carrier family 11 member 2 [Source:HGNC Symbol;Acc:HGNC:10908]	1.48128	12.0368	2.42409e-12	1.90344e-09	Up-regulated
ENSG00000100600	LGMN	legumain [Source:HGNC Symbol;Acc:HGNC:9472]	-1.17224	6.88372	2.92312e-12	2.19965e-09	Down-regulated
ENSG00000083123	BCKDHB	branched chain keto acid dehydrogenase E1 subunit beta [Source:HGNC Symbol;Acc:HGNC:987]	1.41916	5.60129	3.45197e-12	2.48387e-09	Up-regulated
ENSG00000160293	VAV2	vav guanine nucleotide exchange factor 2 [Source:HGNC Symbol;Acc:HGNC:12658]	1.24258	6.26317	3.57589e-12	2.48387e-09	Up-regulated
ENSG00000143641	GALNT2	polypeptide N-acetylgalactosaminyltransferase 2 [Source:HGNC Symbol;Acc:HGNC:4124]	1.08221	6.92779	3.90299e-12	2.61067e-09	Up-regulated
ENSG00000174306	ZHX3	zinc fingers and homeoboxes 3 [Source:HGNC Symbol;Acc:HGNC:15935]	1.97646	6.03219	4.17e-12	2.68965e-09	Up-regulated
ENSG00000067141	NEO1	neogenin 1 [Source:HGNC Symbol;Acc:HGNC:7754]	1.74775	5.45547	4.45724e-12	2.77579e-09	Up-regulated
ENSG00000168243	GNG4	G protein subunit gamma 4 [Source:HGNC Symbol;Acc:HGNC:4407]	1.42041	5.52943	4.66499e-12	2.80833e-09	Up-regulated
ENSG00000105738	SIPA1L3	signal induced proliferation associated 1 like 3 [Source:HGNC Symbol;Acc:HGNC:23801]	1.64697	5.64632	4.96866e-12	2.89465e-09	Up-regulated
ENSG00000198873	GRK5	G protein-coupled receptor kinase 5 [Source:HGNC Symbol;Acc:HGNC:4544]	1.46708	6.02793	6.22795e-12	3.5149e-09	Up-regulated
ENSG00000245080	MIR3150BHG	MIR3150B host gene [Source:HGNC Symbol;Acc:HGNC:52000]	2.11819	3.71812	6.53178e-12	3.57466e-09	Up-regulated
ENSG00000135540	NHSL1	NHS like 1 [Source:HGNC Symbol;Acc:HGNC:21021]	1.47865	6.38995	7.55261e-12	3.95094e-09	Up-regulated
ENSG00000133943	DGLUCY	D-glutamate cyclase [Source:HGNC Symbol;Acc:HGNC:20498]	1.26728	5.42746	7.65687e-12	3.95094e-09	Up-regulated
ENSG00000099256	PRTFDC1	phosphoribosyl transferase domain containing 1 [Source:HGNC Symbol;Acc:HGNC:23333]	1.42881	4.9431	8.09186e-12	3.9625e-09	Up-regulated
ENSG00000149600	COMMD7	COMM domain containing 7 [Source:HGNC Symbol;Acc:HGNC:16223]	1.50314	5.93207	8.28181e-12	3.9625e-09	Up-regulated
ENSG00000165548	TMEM63C	transmembrane protein 63C [Source:HGNC Symbol;Acc:HGNC:23787]	1.70507	3.86838	8.33748e-12	3.9625e-09	Up-regulated
ENSG00000158865	SLC5A11	solute carrier family 5 member 11 [Source:HGNC Symbol;Acc:HGNC:23091]	2.03643	4.4747	9.57719e-12	4.43498e-09	Up-regulated
ENSG00000006659	LGALS14	galectin 14 [Source:HGNC Symbol;Acc:HGNC:30054]	1.30379	9.16218	1.29238e-11	5.83511e-09	Up-regulated
ENSG00000101079	NDRG3	NDRG family member 3 [Source:HGNC Symbol;Acc:HGNC:14462]	1.29172	6.35048	1.35401e-11	5.96425e-09	Up-regulated
ENSG00000174705	SH3PXD2B	SH3 and PX domains 2B [Source:HGNC Symbol;Acc:HGNC:29242]	1.6051	3.50945	1.95466e-11	8.26637e-09	Up-regulated
ENSG00000111110	PPM1H	protein phosphatase, Mg2+/Mn2+ dependent 1H [Source:HGNC Symbol;Acc:HGNC:18583]	1.41326	5.94177	1.96818e-11	8.26637e-09	Up-regulated
ENSG00000056998	GYG2	glycogenin 2 [Source:HGNC Symbol;Acc:HGNC:4700]	1.45933	5.39934	2.07116e-11	8.50116e-09	Up-regulated
ENSG00000172689	MS4A10	membrane spanning 4-domains A10 [Source:HGNC Symbol;Acc:HGNC:13368]	1.7654	7.63559	2.17536e-11	8.73044e-09	Up-regulated
ENSG00000143891	GALM	galactose mutarotase [Source:HGNC Symbol;Acc:HGNC:24063]	1.56932	7.9731	2.25743e-11	8.86288e-09	Up-regulated
ENSG00000189221	MAOA	monoamine oxidase A [Source:HGNC Symbol;Acc:HGNC:6833]	2.28645	4.19093	2.78315e-11	1.04716e-08	Up-regulated
ENSG00000101098	RIMS4	regulating synaptic membrane exocytosis 4 [Source:HGNC Symbol;Acc:HGNC:16183]	1.48966	4.42909	3.02337e-11	1.11433e-08	Up-regulated
ENSG00000204682	MIR1915HG	MIR1915 host gene [Source:HGNC Symbol;Acc:HGNC:31448]	1.57402	4.89949	3.08623e-11	1.11475e-08	Up-regulated
ENSG00000084676	NCOA1	nuclear receptor coactivator 1 [Source:HGNC Symbol;Acc:HGNC:7668]	1.81031	6.59716	3.75729e-11	1.33052e-08	Up-regulated
ENSG00000111907	TPD52L1	TPD52 like 1 [Source:HGNC Symbol;Acc:HGNC:12006]	1.51166	4.97884	3.96034e-11	1.34948e-08	Up-regulated
ENSG00000117834	SLC5A9	solute carrier family 5 member 9 [Source:HGNC Symbol;Acc:HGNC:22146]	1.10123	7.37142	3.96975e-11	1.34948e-08	Up-regulated
ENSG00000204219	TCEA3	transcription elongation factor A3 [Source:HGNC Symbol;Acc:HGNC:11615]	1.58112	4.97859	4.03498e-11	1.34948e-08	Up-regulated
ENSG00000198624	CCDC69	coiled-coil domain containing 69 [Source:HGNC Symbol;Acc:HGNC:24487]	1.3842	6.65057	4.1632e-11	1.36704e-08	Up-regulated
ENSG00000108100	CCNY	cyclin Y [Source:HGNC Symbol;Acc:HGNC:23354]	1.28672	6.67013	4.62656e-11	1.47608e-08	Up-regulated
ENSG00000165406	MARCHF8	membrane associated ring-CH-type finger 8 [Source:HGNC Symbol;Acc:HGNC:23356]	1.49789	5.95364	4.65872e-11	1.47608e-08	Up-regulated
ENSG00000172292	CERS6	ceramide synthase 6 [Source:HGNC Symbol;Acc:HGNC:23826]	1.55876	6.58926	5.52009e-11	1.71884e-08	Up-regulated
ENSG00000079739	PGM1	phosphoglucomutase 1 [Source:HGNC Symbol;Acc:HGNC:8905]	1.08449	6.80533	5.83987e-11	1.7578e-08	Up-regulated
ENSG00000134882	UBAC2	UBA domain containing 2 [Source:HGNC Symbol;Acc:HGNC:20486]	1.24088	7.09642	5.9671e-11	1.76665e-08	Up-regulated
ENSG00000067992	PDK3	pyruvate dehydrogenase kinase 3 [Source:HGNC Symbol;Acc:HGNC:8811]	1.54031	5.31528	6.25654e-11	1.82247e-08	Up-regulated
ENSG00000132670	PTPRA	protein tyrosine phosphatase receptor type A [Source:HGNC Symbol;Acc:HGNC:9664]	1.17132	8.02993	6.5481e-11	1.87712e-08	Up-regulated
ENSG00000266074	BAHCC1	BAH domain and coiled-coil containing 1 [Source:HGNC Symbol;Acc:HGNC:29279]	1.52697	4.09151	6.99791e-11	1.94136e-08	Up-regulated
ENSG00000197077	KIAA1671	KIAA1671 [Source:HGNC Symbol;Acc:HGNC:29345]	1.45065	6.17944	7.0372e-11	1.94136e-08	Up-regulated
ENSG00000144283	PKP4	plakophilin 4 [Source:HGNC Symbol;Acc:HGNC:9026]	1.24429	6.31138	7.09469e-11	1.94136e-08	Up-regulated
ENSG00000188993	LRRC66	leucine rich repeat containing 66 [Source:HGNC Symbol;Acc:HGNC:34299]	2.03003	4.88821	8.33299e-11	2.24618e-08	Up-regulated
ENSG00000140563	MCTP2	multiple C2 and transmembrane domain containing 2 [Source:HGNC Symbol;Acc:HGNC:25636]	1.33719	4.89687	9.47395e-11	2.51617e-08	Up-regulated
ENSG00000125648	SLC25A23	solute carrier family 25 member 23 [Source:HGNC Symbol;Acc:HGNC:19375]	1.07138	6.64809	9.85806e-11	2.56652e-08	Up-regulated
ENSG00000103056	SMPD3	sphingomyelin phosphodiesterase 3 [Source:HGNC Symbol;Acc:HGNC:14240]	1.39819	6.09564	9.94775e-11	2.56652e-08	Up-regulated
ENSG00000162734	PEA15	proliferation and apoptosis adaptor protein 15 [Source:HGNC Symbol;Acc:HGNC:8822]	-1.07674	6.84871	1.09999e-10	2.79799e-08	Down-regulated
ENSG00000149596	JPH2	junctophilin 2 [Source:HGNC Symbol;Acc:HGNC:14202]	1.41287	5.32368	1.16466e-10	2.92136e-08	Up-regulated
ENSG00000139428	MMAB	metabolism of cobalamin associated B [Source:HGNC Symbol;Acc:HGNC:19331]	1.12808	4.60182	1.23164e-10	3.04705e-08	Up-regulated
ENSG00000163032	VSNL1	visinin like 1 [Source:HGNC Symbol;Acc:HGNC:12722]	2.18939	5.88416	1.2581e-10	3.06549e-08	Up-regulated
ENSG00000132688	NES	nestin [Source:HGNC Symbol;Acc:HGNC:7756]	-1.33384	6.90983	1.27304e-10	3.06549e-08	Down-regulated
ENSG00000166391	MOGAT2	monoacylglycerol O-acyltransferase 2 [Source:HGNC Symbol;Acc:HGNC:23248]	2.4781	3.79105	1.29894e-10	3.0867e-08	Up-regulated
ENSG00000131015	ULBP2	UL16 binding protein 2 [Source:HGNC Symbol;Acc:HGNC:14894]	-1.62607	4.79722	1.3267e-10	3.11172e-08	Down-regulated
ENSG00000153904	DDAH1	dimethylarginine dimethylaminohydrolase 1 [Source:HGNC Symbol;Acc:HGNC:2715]	1.27625	7.18916	1.63742e-10	3.74327e-08	Up-regulated
ENSG00000124406	ATP8A1	ATPase phospholipid transporting 8A1 [Source:HGNC Symbol;Acc:HGNC:13531]	1.93219	5.63984	1.71263e-10	3.86626e-08	Up-regulated
ENSG00000165868	HSPA12A	heat shock protein family A (Hsp70) member 12A [Source:HGNC Symbol;Acc:HGNC:19022]	1.37883	3.81591	1.76049e-10	3.92235e-08	Up-regulated
ENSG00000141682	PMAIP1	phorbol-12-myristate-13-acetate-induced protein 1 [Source:HGNC Symbol;Acc:HGNC:9108]	-2.46013	4.29815	1.78091e-10	3.92235e-08	Down-regulated
ENSG00000145349	CAMK2D	calcium/calmodulin dependent protein kinase II delta [Source:HGNC Symbol;Acc:HGNC:1462]	1.61835	6.31406	1.80936e-10	3.92987e-08	Up-regulated
ENSG00000175592	FOSL1	FOS like 1, AP-1 transcription factor subunit [Source:HGNC Symbol;Acc:HGNC:13718]	-2.00118	3.80491	1.82785e-10	3.92987e-08	Down-regulated
ENSG00000166575	TMEM135	transmembrane protein 135 [Source:HGNC Symbol;Acc:HGNC:26167]	1.38599	6.05931	2.00211e-10	4.2539e-08	Up-regulated
ENSG00000167306	MYO5B	myosin VB [Source:HGNC Symbol;Acc:HGNC:7603]	1.25171	6.13904	2.19816e-10	4.53108e-08	Up-regulated
ENSG00000132792	CTNNBL1	catenin beta like 1 [Source:HGNC Symbol;Acc:HGNC:15879]	1.11942	7.39669	2.20261e-10	4.53108e-08	Up-regulated
ENSG00000150054	MPP7	membrane palmitoylated protein 7 [Source:HGNC Symbol;Acc:HGNC:26542]	1.37502	5.79611	2.22214e-10	4.53108e-08	Up-regulated
ENSG00000148483	TMEM236	transmembrane protein 236 [Source:HGNC Symbol;Acc:HGNC:23473]	1.66238	4.84681	2.23293e-10	4.53108e-08	Up-regulated
ENSG00000186350	RXRA	retinoid X receptor alpha [Source:HGNC Symbol;Acc:HGNC:10477]	1.43791	5.83047	2.34682e-10	4.70928e-08	Up-regulated
ENSG00000064787	BCAS1	brain enriched myelin associated protein 1 [Source:HGNC Symbol;Acc:HGNC:974]	2.04088	3.51494	2.47203e-10	4.9016e-08	Up-regulated
ENSG00000082438	COBLL1	cordon-bleu WH2 repeat protein like 1 [Source:HGNC Symbol;Acc:HGNC:23571]	1.45195	5.82589	2.49694e-10	4.9016e-08	Up-regulated
ENSG00000288612	0	novel transcript	-2.01051	1.58023	2.62863e-10	5.10464e-08	Down-regulated
ENSG00000147044	CASK	calcium/calmodulin dependent serine protein kinase [Source:HGNC Symbol;Acc:HGNC:1497]	1.69253	6.91441	2.84267e-10	5.46155e-08	Up-regulated
ENSG00000106554	CHCHD3	coiled-coil-helix-coiled-coil-helix domain containing 3 [Source:HGNC Symbol;Acc:HGNC:21906]	1.023	5.8037	2.88745e-10	5.4892e-08	Up-regulated
ENSG00000117616	RSRP1	arginine and serine rich protein 1 [Source:HGNC Symbol;Acc:HGNC:25234]	-1.77077	6.85729	3e-10	5.59731e-08	Down-regulated
ENSG00000121858	TNFSF10	TNF superfamily member 10 [Source:HGNC Symbol;Acc:HGNC:11925]	1.51196	6.10852	3.00631e-10	5.59731e-08	Up-regulated
ENSG00000162231	NXF1	nuclear RNA export factor 1 [Source:HGNC Symbol;Acc:HGNC:8071]	-1.76575	8.81248	3.24631e-10	5.98249e-08	Down-regulated
ENSG00000177614	PGBD5	piggyBac transposable element derived 5 [Source:HGNC Symbol;Acc:HGNC:19405]	1.81436	3.99882	3.28598e-10	5.99443e-08	Up-regulated
ENSG00000053254	FOXN3	forkhead box N3 [Source:HGNC Symbol;Acc:HGNC:1928]	1.85058	6.56821	3.35799e-10	6.06452e-08	Up-regulated
ENSG00000160216	AGPAT3	1-acylglycerol-3-phosphate O-acyltransferase 3 [Source:HGNC Symbol;Acc:HGNC:326]	1.35138	6.7202	3.41653e-10	6.10916e-08	Up-regulated
ENSG00000184205	TSPYL2	TSPY like 2 [Source:HGNC Symbol;Acc:HGNC:24358]	-1.5931	7.53046	3.54288e-10	6.27188e-08	Down-regulated
ENSG00000145782	ATG12	autophagy related 12 [Source:HGNC Symbol;Acc:HGNC:588]	-1.03288	6.60176	3.57721e-10	6.27188e-08	Down-regulated
ENSG00000204978	ERICH4	glutamate rich 4 [Source:HGNC Symbol;Acc:HGNC:34497]	1.34672	6.37563	3.61172e-10	6.27188e-08	Up-regulated
ENSG00000178445	GLDC	glycine decarboxylase [Source:HGNC Symbol;Acc:HGNC:4313]	1.16782	6.47844	3.72703e-10	6.41048e-08	Up-regulated
ENSG00000196998	WDR45	WD repeat domain 45 [Source:HGNC Symbol;Acc:HGNC:28912]	-1.23551	4.63211	3.99949e-10	6.81423e-08	Down-regulated
ENSG00000064652	SNX24	sorting nexin 24 [Source:HGNC Symbol;Acc:HGNC:21533]	1.33269	5.10397	4.06899e-10	6.86785e-08	Up-regulated
ENSG00000107077	KDM4C	lysine demethylase 4C [Source:HGNC Symbol;Acc:HGNC:17071]	1.24572	5.65295	4.17656e-10	6.97166e-08	Up-regulated
ENSG00000120437	ACAT2	acetyl-CoA acetyltransferase 2 [Source:HGNC Symbol;Acc:HGNC:94]	1.01144	6.98128	4.26166e-10	6.97166e-08	Up-regulated
ENSG00000141576	RNF157	ring finger protein 157 [Source:HGNC Symbol;Acc:HGNC:29402]	1.48421	5.084	4.26431e-10	6.97166e-08	Up-regulated
ENSG00000197555	SIPA1L1	signal induced proliferation associated 1 like 1 [Source:HGNC Symbol;Acc:HGNC:20284]	1.03227	6.23566	4.28491e-10	6.97166e-08	Up-regulated
ENSG00000157570	TSPAN18	tetraspanin 18 [Source:HGNC Symbol;Acc:HGNC:20660]	2.18471	4.85484	4.34325e-10	6.98721e-08	Up-regulated
ENSG00000103319	EEF2K	eukaryotic elongation factor 2 kinase [Source:HGNC Symbol;Acc:HGNC:24615]	1.0205	6.31347	4.37185e-10	6.98721e-08	Up-regulated
ENSG00000173597	SULT1B1	sulfotransferase family 1B member 1 [Source:HGNC Symbol;Acc:HGNC:17845]	2.09928	5.31334	4.44894e-10	7.04806e-08	Up-regulated
ENSG00000137462	TLR2	toll like receptor 2 [Source:HGNC Symbol;Acc:HGNC:11848]	1.47302	4.47832	4.99417e-10	7.84302e-08	Up-regulated
ENSG00000156639	ZFAND3	zinc finger AN1-type containing 3 [Source:HGNC Symbol;Acc:HGNC:18019]	1.10315	6.05295	5.15475e-10	8.02541e-08	Up-regulated
ENSG00000241635	UGT1A1	UDP glucuronosyltransferase family 1 member A1 [Source:HGNC Symbol;Acc:HGNC:12530]	-1.71546	2.46422	5.29777e-10	8.1625e-08	Down-regulated
ENSG00000038945	MSR1	macrophage scavenger receptor 1 [Source:HGNC Symbol;Acc:HGNC:7376]	1.38645	6.49805	5.44044e-10	8.22591e-08	Up-regulated
ENSG00000166869	CHP2	calcineurin like EF-hand protein 2 [Source:HGNC Symbol;Acc:HGNC:24927]	1.26596	6.70544	5.46572e-10	8.22591e-08	Up-regulated
ENSG00000010803	SCMH1	Scm polycomb group protein homolog 1 [Source:HGNC Symbol;Acc:HGNC:19003]	1.25083	4.67032	5.57424e-10	8.31989e-08	Up-regulated
ENSG00000197971	MBP	myelin basic protein [Source:HGNC Symbol;Acc:HGNC:6925]	1.36703	4.37495	5.76259e-10	8.46116e-08	Up-regulated
ENSG00000114455	HHLA2	HERV-H LTR-associating 2 [Source:HGNC Symbol;Acc:HGNC:4905]	1.46206	8.1602	5.87207e-10	8.55239e-08	Up-regulated
ENSG00000112494	UNC93A	unc-93 homolog A [Source:HGNC Symbol;Acc:HGNC:12570]	1.10385	4.09637	6.04658e-10	8.7361e-08	Up-regulated
ENSG00000113719	ERGIC1	endoplasmic reticulum-golgi intermediate compartment 1 [Source:HGNC Symbol;Acc:HGNC:29205]	1.24916	8.16094	6.28129e-10	9.00318e-08	Up-regulated
ENSG00000137575	SDCBP	syndecan binding protein [Source:HGNC Symbol;Acc:HGNC:10662]	-1.04236	7.55333	6.66642e-10	9.26318e-08	Down-regulated
ENSG00000129084	PSMA1	proteasome 20S subunit alpha 1 [Source:HGNC Symbol;Acc:HGNC:9530]	-1.60762	5.65225	6.66785e-10	9.26318e-08	Down-regulated
ENSG00000054219	LY75	lymphocyte antigen 75 [Source:HGNC Symbol;Acc:HGNC:6729]	1.27739	5.51923	6.97796e-10	9.62e-08	Up-regulated
ENSG00000130707	ASS1	argininosuccinate synthase 1 [Source:HGNC Symbol;Acc:HGNC:758]	1.59418	7.22794	7.10785e-10	9.68087e-08	Up-regulated
ENSG00000149177	PTPRJ	protein tyrosine phosphatase receptor type J [Source:HGNC Symbol;Acc:HGNC:9673]	1.57971	6.00834	7.12933e-10	9.68087e-08	Up-regulated
ENSG00000279086	0	TEC	-2.93283	3.04417	7.28384e-10	9.81687e-08	Down-regulated
ENSG00000075651	PLD1	phospholipase D1 [Source:HGNC Symbol;Acc:HGNC:9067]	1.60256	6.01319	7.91548e-10	1.05892e-07	Up-regulated
ENSG00000163624	CDS1	CDP-diacylglycerol synthase 1 [Source:HGNC Symbol;Acc:HGNC:1800]	1.43503	6.66343	8.10549e-10	1.06959e-07	Up-regulated
ENSG00000152782	PANK1	pantothenate kinase 1 [Source:HGNC Symbol;Acc:HGNC:8598]	1.35735	5.91815	8.11371e-10	1.06959e-07	Up-regulated
ENSG00000152894	PTPRK	protein tyrosine phosphatase receptor type K [Source:HGNC Symbol;Acc:HGNC:9674]	1.63926	6.55197	8.42977e-10	1.09015e-07	Up-regulated
ENSG00000135423	GLS2	glutaminase 2 [Source:HGNC Symbol;Acc:HGNC:29570]	1.27334	4.56871	8.43043e-10	1.09015e-07	Up-regulated
ENSG00000107731	UNC5B	unc-5 netrin receptor B [Source:HGNC Symbol;Acc:HGNC:12568]	1.10916	5.44409	8.59072e-10	1.09396e-07	Up-regulated
ENSG00000151090	THRB	thyroid hormone receptor beta [Source:HGNC Symbol;Acc:HGNC:11799]	1.60504	6.07093	8.60145e-10	1.09396e-07	Up-regulated
ENSG00000064393	HIPK2	homeodomain interacting protein kinase 2 [Source:HGNC Symbol;Acc:HGNC:14402]	2.02426	4.62191	8.74287e-10	1.10417e-07	Up-regulated
ENSG00000137103	TMEM8B	transmembrane protein 8B [Source:HGNC Symbol;Acc:HGNC:21427]	1.0588	4.84396	8.96114e-10	1.12014e-07	Up-regulated
ENSG00000139714	MORN3	MORN repeat containing 3 [Source:HGNC Symbol;Acc:HGNC:29807]	1.14486	4.61273	9.05709e-10	1.12014e-07	Up-regulated
ENSG00000007062	PROM1	prominin 1 [Source:HGNC Symbol;Acc:HGNC:9454]	1.67291	6.30282	9.12325e-10	1.12014e-07	Up-regulated
ENSG00000166263	STXBP4	syntaxin binding protein 4 [Source:HGNC Symbol;Acc:HGNC:19694]	1.62366	4.37517	9.23509e-10	1.12014e-07	Up-regulated
ENSG00000133316	WDR74	WD repeat domain 74 [Source:HGNC Symbol;Acc:HGNC:25529]	-1.78144	7.01124	9.2415e-10	1.12014e-07	Down-regulated
ENSG00000064763	FAR2	fatty acyl-CoA reductase 2 [Source:HGNC Symbol;Acc:HGNC:25531]	1.16455	5.39901	9.95038e-10	1.19803e-07	Up-regulated
ENSG00000145384	FABP2	fatty acid binding protein 2 [Source:HGNC Symbol;Acc:HGNC:3556]	1.85359	5.47086	1.02212e-09	1.21465e-07	Up-regulated
ENSG00000103061	SLC7A6OS	solute carrier family 7 member 6 opposite strand [Source:HGNC Symbol;Acc:HGNC:25807]	-1.12497	6.62844	1.0223e-09	1.21465e-07	Down-regulated
ENSG00000164949	GEM	GTP binding protein overexpressed in skeletal muscle [Source:HGNC Symbol;Acc:HGNC:4234]	-1.6109	4.5072	1.06624e-09	1.25041e-07	Down-regulated
ENSG00000100647	SUSD6	sushi domain containing 6 [Source:HGNC Symbol;Acc:HGNC:19956]	1.02051	6.52072	1.10699e-09	1.28982e-07	Up-regulated
ENSG00000112394	SLC16A10	solute carrier family 16 member 10 [Source:HGNC Symbol;Acc:HGNC:17027]	1.91286	4.68166	1.15023e-09	1.33161e-07	Up-regulated
ENSG00000144749	LRIG1	leucine rich repeats and immunoglobulin like domains 1 [Source:HGNC Symbol;Acc:HGNC:17360]	1.50025	5.67718	1.26397e-09	1.44345e-07	Up-regulated
ENSG00000126970	ZC4H2	zinc finger C4H2-type containing [Source:HGNC Symbol;Acc:HGNC:24931]	1.24126	4.14013	1.26727e-09	1.44345e-07	Up-regulated
ENSG00000225329	LHFPL3-AS2	LHFPL3 antisense RNA 2 [Source:HGNC Symbol;Acc:HGNC:44106]	1.49307	3.76467	1.27081e-09	1.44345e-07	Up-regulated
ENSG00000139173	TMEM117	transmembrane protein 117 [Source:HGNC Symbol;Acc:HGNC:25308]	2.17287	4.88892	1.33057e-09	1.48334e-07	Up-regulated
ENSG00000079691	CARMIL1	capping protein regulator and myosin 1 linker 1 [Source:HGNC Symbol;Acc:HGNC:21581]	1.30406	5.76967	1.3507e-09	1.49654e-07	Up-regulated
ENSG00000197241	SLC2A7	solute carrier family 2 member 7 [Source:HGNC Symbol;Acc:HGNC:13445]	2.5953	2.09888	1.35998e-09	1.49764e-07	Up-regulated
ENSG00000136295	TTYH3	tweety family member 3 [Source:HGNC Symbol;Acc:HGNC:22222]	1.08858	5.71227	1.37459e-09	1.50455e-07	Up-regulated
ENSG00000117586	TNFSF4	TNF superfamily member 4 [Source:HGNC Symbol;Acc:HGNC:11934]	2.3271	3.9787	1.40135e-09	1.51547e-07	Up-regulated
ENSG00000143369	ECM1	extracellular matrix protein 1 [Source:HGNC Symbol;Acc:HGNC:3153]	-1.60714	3.1807	1.43381e-09	1.54135e-07	Down-regulated
ENSG00000169084	DHRSX	dehydrogenase/reductase X-linked [Source:HGNC Symbol;Acc:HGNC:18399]	1.65469	4.6174	1.48482e-09	1.56841e-07	Up-regulated
ENSG00000224259	LINC01133	long intergenic non-protein coding RNA 1133 [Source:HGNC Symbol;Acc:HGNC:49447]	1.90211	3.42724	1.48685e-09	1.56841e-07	Up-regulated
ENSG00000157600	TMEM164	transmembrane protein 164 [Source:HGNC Symbol;Acc:HGNC:26217]	1.34162	6.59228	1.50234e-09	1.56841e-07	Up-regulated
ENSG00000159842	ABR	ABR activator of RhoGEF and GTPase [Source:HGNC Symbol;Acc:HGNC:81]	1.09707	6.3219	1.53273e-09	1.58797e-07	Up-regulated
ENSG00000196352	CD55	CD55 molecule (Cromer blood group) [Source:HGNC Symbol;Acc:HGNC:2665]	-1.16396	7.09041	1.53873e-09	1.58797e-07	Down-regulated
ENSG00000137960	GIPC2	GIPC PDZ domain containing family member 2 [Source:HGNC Symbol;Acc:HGNC:18177]	1.70007	6.0674	1.56016e-09	1.60094e-07	Up-regulated
ENSG00000109667	SLC2A9	solute carrier family 2 member 9 [Source:HGNC Symbol;Acc:HGNC:13446]	1.67691	2.79578	1.70513e-09	1.73888e-07	Up-regulated
ENSG00000025039	RRAGD	Ras related GTP binding D [Source:HGNC Symbol;Acc:HGNC:19903]	1.32911	5.74475	1.71385e-09	1.73888e-07	Up-regulated
ENSG00000171174	RBKS	ribokinase [Source:HGNC Symbol;Acc:HGNC:30325]	1.3429	5.51812	1.75064e-09	1.74576e-07	Up-regulated
ENSG00000004866	ST7	suppression of tumorigenicity 7 [Source:HGNC Symbol;Acc:HGNC:11351]	1.1896	4.99288	1.75293e-09	1.74576e-07	Up-regulated
ENSG00000131019	ULBP3	UL16 binding protein 3 [Source:HGNC Symbol;Acc:HGNC:14895]	-1.48443	3.69525	1.75785e-09	1.74576e-07	Down-regulated
ENSG00000003096	KLHL13	kelch like family member 13 [Source:HGNC Symbol;Acc:HGNC:22931]	2.44962	5.08144	1.75929e-09	1.74576e-07	Up-regulated
ENSG00000164039	BDH2	3-hydroxybutyrate dehydrogenase 2 [Source:HGNC Symbol;Acc:HGNC:32389]	1.14404	5.5609	1.83042e-09	1.7935e-07	Up-regulated
ENSG00000116985	BMP8B	bone morphogenetic protein 8b [Source:HGNC Symbol;Acc:HGNC:1075]	1.35715	4.88283	1.87207e-09	1.81772e-07	Up-regulated
ENSG00000093217	XYLB	xylulokinase [Source:HGNC Symbol;Acc:HGNC:12839]	1.19293	5.6777	1.90674e-09	1.83674e-07	Up-regulated
ENSG00000085511	MAP3K4	mitogen-activated protein kinase kinase kinase 4 [Source:HGNC Symbol;Acc:HGNC:6856]	1.21926	4.68908	1.95234e-09	1.86198e-07	Up-regulated
ENSG00000188559	RALGAPA2	Ral GTPase activating protein catalytic subunit alpha 2 [Source:HGNC Symbol;Acc:HGNC:16207]	1.30658	5.32922	1.95889e-09	1.86198e-07	Up-regulated
ENSG00000119899	SLC17A5	solute carrier family 17 member 5 [Source:HGNC Symbol;Acc:HGNC:10933]	1.24383	6.71914	1.97156e-09	1.86421e-07	Up-regulated
ENSG00000107242	PIP5K1B	phosphatidylinositol-4-phosphate 5-kinase type 1 beta [Source:HGNC Symbol;Acc:HGNC:8995]	1.59495	3.95603	1.9858e-09	1.86789e-07	Up-regulated
ENSG00000047230	CTPS2	CTP synthase 2 [Source:HGNC Symbol;Acc:HGNC:2520]	1.14049	5.40599	2.03325e-09	1.9011e-07	Up-regulated
ENSG00000100170	SLC5A1	solute carrier family 5 member 1 [Source:HGNC Symbol;Acc:HGNC:11036]	1.05683	5.89688	2.04216e-09	1.9011e-07	Up-regulated
ENSG00000054965	FAM168A	family with sequence similarity 168 member A [Source:HGNC Symbol;Acc:HGNC:28999]	1.13556	6.62491	2.13873e-09	1.9739e-07	Up-regulated
ENSG00000081913	PHLPP1	PH domain and leucine rich repeat protein phosphatase 1 [Source:HGNC Symbol;Acc:HGNC:20610]	1.14361	4.28525	2.17036e-09	1.98968e-07	Up-regulated
ENSG00000075568	TMEM131	transmembrane protein 131 [Source:HGNC Symbol;Acc:HGNC:30366]	1.13927	6.88674	2.28696e-09	2.07376e-07	Up-regulated
ENSG00000110693	SOX6	SRY-box transcription factor 6 [Source:HGNC Symbol;Acc:HGNC:16421]	1.75113	5.1078	2.29653e-09	2.07376e-07	Up-regulated
ENSG00000196814	MVB12B	multivesicular body subunit 12B [Source:HGNC Symbol;Acc:HGNC:23368]	1.52092	4.34125	2.32093e-09	2.08537e-07	Up-regulated
ENSG00000164404	GDF9	growth differentiation factor 9 [Source:HGNC Symbol;Acc:HGNC:4224]	-2.32689	1.57945	2.34565e-09	2.09715e-07	Down-regulated
ENSG00000155465	SLC7A7	solute carrier family 7 member 7 [Source:HGNC Symbol;Acc:HGNC:11065]	1.06812	9.59747	2.41115e-09	2.1451e-07	Up-regulated
ENSG00000144711	IQSEC1	IQ motif and Sec7 domain ArfGEF 1 [Source:HGNC Symbol;Acc:HGNC:29112]	1.13261	5.10732	2.44573e-09	2.16519e-07	Up-regulated
ENSG00000006704	GTF2IRD1	GTF2I repeat domain containing 1 [Source:HGNC Symbol;Acc:HGNC:4661]	1.42317	4.99642	2.46986e-09	2.17262e-07	Up-regulated
ENSG00000147883	CDKN2B	cyclin dependent kinase inhibitor 2B [Source:HGNC Symbol;Acc:HGNC:1788]	-1.1483	5.56948	2.48785e-09	2.17262e-07	Down-regulated
ENSG00000198130	HIBCH	3-hydroxyisobutyryl-CoA hydrolase [Source:HGNC Symbol;Acc:HGNC:4908]	1.02604	5.4594	2.49021e-09	2.17262e-07	Up-regulated
ENSG00000285933	0	novel transcript	1.28063	3.89875	2.55643e-09	2.21967e-07	Up-regulated
ENSG00000172748	ZNF596	zinc finger protein 596 [Source:HGNC Symbol;Acc:HGNC:27268]	-1.86634	2.25229	2.70361e-09	2.33623e-07	Down-regulated
ENSG00000169906	S100G	S100 calcium binding protein G [Source:HGNC Symbol;Acc:HGNC:1436]	1.60916	5.48606	2.73637e-09	2.35328e-07	Up-regulated
ENSG00000189319	FAM53B	family with sequence similarity 53 member B [Source:HGNC Symbol;Acc:HGNC:28968]	2.08896	4.51045	2.85221e-09	2.43735e-07	Up-regulated
ENSG00000176974	SHMT1	serine hydroxymethyltransferase 1 [Source:HGNC Symbol;Acc:HGNC:10850]	1.09379	5.34306	2.86112e-09	2.43735e-07	Up-regulated
ENSG00000047457	CP	ceruloplasmin [Source:HGNC Symbol;Acc:HGNC:2295]	1.40173	5.18965	2.94043e-09	2.47605e-07	Up-regulated
ENSG00000165475	CRYL1	crystallin lambda 1 [Source:HGNC Symbol;Acc:HGNC:18246]	1.36565	6.68926	2.94768e-09	2.47605e-07	Up-regulated
ENSG00000142197	DOP1B	DOP1 leucine zipper like protein B [Source:HGNC Symbol;Acc:HGNC:1291]	1.07572	5.5887	2.96192e-09	2.47649e-07	Up-regulated
ENSG00000151612	ZNF827	zinc finger protein 827 [Source:HGNC Symbol;Acc:HGNC:27193]	1.34748	4.71879	3.09376e-09	2.5748e-07	Up-regulated
ENSG00000119522	DENND1A	DENN domain containing 1A [Source:HGNC Symbol;Acc:HGNC:29324]	1.35386	5.37145	3.12703e-09	2.59056e-07	Up-regulated
ENSG00000082781	ITGB5	integrin subunit beta 5 [Source:HGNC Symbol;Acc:HGNC:6160]	1.00371	5.84406	3.15629e-09	2.60286e-07	Up-regulated
ENSG00000136478	TEX2	testis expressed 2 [Source:HGNC Symbol;Acc:HGNC:30884]	1.26391	6.01275	3.17912e-09	2.60977e-07	Up-regulated
ENSG00000163536	SERPINI1	serpin family I member 1 [Source:HGNC Symbol;Acc:HGNC:8943]	-1.42804	3.84844	3.25829e-09	2.66266e-07	Down-regulated
ENSG00000068323	TFE3	transcription factor binding to IGHM enhancer 3 [Source:HGNC Symbol;Acc:HGNC:11752]	-1.03313	5.99835	3.3059e-09	2.6894e-07	Down-regulated
ENSG00000073331	ALPK1	alpha kinase 1 [Source:HGNC Symbol;Acc:HGNC:20917]	1.07101	4.24121	3.46131e-09	2.8032e-07	Up-regulated
ENSG00000183508	TENT5C	terminal nucleotidyltransferase 5C [Source:HGNC Symbol;Acc:HGNC:24712]	-1.58834	3.22935	3.5255e-09	2.81728e-07	Down-regulated
ENSG00000173930	SLCO4C1	solute carrier organic anion transporter family member 4C1 [Source:HGNC Symbol;Acc:HGNC:23612]	2.07921	3.45641	3.67884e-09	2.89376e-07	Up-regulated
ENSG00000171914	TLN2	talin 2 [Source:HGNC Symbol;Acc:HGNC:15447]	1.16691	5.28452	3.6853e-09	2.89376e-07	Up-regulated
ENSG00000169439	SDC2	syndecan 2 [Source:HGNC Symbol;Acc:HGNC:10659]	1.18752	4.97661	3.93334e-09	3.07516e-07	Up-regulated
ENSG00000103381	CPPED1	calcineurin like phosphoesterase domain containing 1 [Source:HGNC Symbol;Acc:HGNC:25632]	1.52079	5.13363	3.97154e-09	3.09164e-07	Up-regulated
ENSG00000134508	CABLES1	Cdk5 and Abl enzyme substrate 1 [Source:HGNC Symbol;Acc:HGNC:25097]	1.24155	4.55329	4.03246e-09	3.10959e-07	Up-regulated
ENSG00000033170	FUT8	fucosyltransferase 8 [Source:HGNC Symbol;Acc:HGNC:4019]	1.18793	5.546	4.06378e-09	3.10983e-07	Up-regulated
ENSG00000213047	DENND1B	DENN domain containing 1B [Source:HGNC Symbol;Acc:HGNC:28404]	1.49333	3.79516	4.11915e-09	3.12571e-07	Up-regulated
ENSG00000142751	GPN2	GPN-loop GTPase 2 [Source:HGNC Symbol;Acc:HGNC:25513]	-1.11218	5.80681	4.17084e-09	3.15169e-07	Down-regulated
ENSG00000204472	AIF1	allograft inflammatory factor 1 [Source:HGNC Symbol;Acc:HGNC:352]	1.4626	3.41783	4.24579e-09	3.1817e-07	Up-regulated
ENSG00000285230	RALY-AS1	RALY antisense RNA 1 [Source:HGNC Symbol;Acc:HGNC:50743]	-1.61996	5.4196	4.28159e-09	3.19527e-07	Down-regulated
ENSG00000113070	HBEGF	heparin binding EGF like growth factor [Source:HGNC Symbol;Acc:HGNC:3059]	-2.30406	5.77448	4.3195e-09	3.21029e-07	Down-regulated
ENSG00000068383	INPP5A	inositol polyphosphate-5-phosphatase A [Source:HGNC Symbol;Acc:HGNC:6076]	1.30797	4.89273	4.35482e-09	3.22328e-07	Up-regulated
ENSG00000095637	SORBS1	sorbin and SH3 domain containing 1 [Source:HGNC Symbol;Acc:HGNC:14565]	1.37145	7.41393	4.42155e-09	3.25931e-07	Up-regulated
ENSG00000156011	PSD3	pleckstrin and Sec7 domain containing 3 [Source:HGNC Symbol;Acc:HGNC:19093]	2.57209	4.11886	4.50315e-09	3.28048e-07	Up-regulated
ENSG00000255545	B3GAT1-DT	B3GAT1 divergent transcript [Source:HGNC Symbol;Acc:HGNC:27449]	1.46539	3.87076	4.53528e-09	3.28944e-07	Up-regulated
ENSG00000166268	MYRFL	myelin regulatory factor like [Source:HGNC Symbol;Acc:HGNC:26316]	1.48982	4.1906	4.92684e-09	3.50972e-07	Up-regulated
ENSG00000171843	MLLT3	MLLT3 super elongation complex subunit [Source:HGNC Symbol;Acc:HGNC:7136]	1.33439	4.99443	4.93615e-09	3.50972e-07	Up-regulated
ENSG00000057593	F7	coagulation factor VII [Source:HGNC Symbol;Acc:HGNC:3544]	1.28257	6.6926	5.00286e-09	3.5432e-07	Up-regulated
ENSG00000122574	WIPF3	WAS/WASL interacting protein family member 3 [Source:HGNC Symbol;Acc:HGNC:22004]	1.12535	4.42819	5.04457e-09	3.55597e-07	Up-regulated
ENSG00000178585	CTNNBIP1	catenin beta interacting protein 1 [Source:HGNC Symbol;Acc:HGNC:16913]	1.28635	3.09139	5.06026e-09	3.55597e-07	Up-regulated
ENSG00000189157	FAM47E	family with sequence similarity 47 member E [Source:HGNC Symbol;Acc:HGNC:34343]	1.49362	2.8311	5.12951e-09	3.57749e-07	Up-regulated
ENSG00000101493	ZNF516	zinc finger protein 516 [Source:HGNC Symbol;Acc:HGNC:28990]	1.32485	3.09696	5.13051e-09	3.57749e-07	Up-regulated
ENSG00000117266	CDK18	cyclin dependent kinase 18 [Source:HGNC Symbol;Acc:HGNC:8751]	1.00679	6.5999	5.16955e-09	3.59085e-07	Up-regulated
ENSG00000013583	HEBP1	heme binding protein 1 [Source:HGNC Symbol;Acc:HGNC:17176]	1.02145	7.02728	5.28189e-09	3.63821e-07	Up-regulated
ENSG00000184368	MAP7D2	MAP7 domain containing 2 [Source:HGNC Symbol;Acc:HGNC:25899]	1.18973	4.95586	5.29817e-09	3.63821e-07	Up-regulated
ENSG00000170085	SIMC1	SUMO interacting motifs containing 1 [Source:HGNC Symbol;Acc:HGNC:24779]	1.13958	3.9704	5.41829e-09	3.7066e-07	Up-regulated
ENSG00000168765	GSTM4	glutathione S-transferase mu 4 [Source:HGNC Symbol;Acc:HGNC:4636]	1.44503	5.46568	5.62834e-09	3.83341e-07	Up-regulated
ENSG00000162542	TMCO4	transmembrane and coiled-coil domains 4 [Source:HGNC Symbol;Acc:HGNC:27393]	1.20381	4.29139	5.64611e-09	3.83341e-07	Up-regulated
ENSG00000278195	SSTR3	somatostatin receptor 3 [Source:HGNC Symbol;Acc:HGNC:11332]	1.61492	2.54422	5.71785e-09	3.86758e-07	Up-regulated
ENSG00000099139	PCSK5	proprotein convertase subtilisin/kexin type 5 [Source:HGNC Symbol;Acc:HGNC:8747]	1.24322	4.76755	5.9959e-09	4.01126e-07	Up-regulated
ENSG00000070214	SLC44A1	solute carrier family 44 member 1 [Source:HGNC Symbol;Acc:HGNC:18798]	1.18695	8.2627	5.9969e-09	4.01126e-07	Up-regulated
ENSG00000175183	CSRP2	cysteine and glycine rich protein 2 [Source:HGNC Symbol;Acc:HGNC:2470]	1.13896	4.05593	6.22818e-09	4.15058e-07	Up-regulated
ENSG00000130021	PUDP	pseudouridine 5'-phosphatase [Source:HGNC Symbol;Acc:HGNC:16818]	1.10304	5.79936	6.29771e-09	4.1815e-07	Up-regulated
ENSG00000105967	TFEC	transcription factor EC [Source:HGNC Symbol;Acc:HGNC:11754]	1.36172	7.82693	6.4103e-09	4.24066e-07	Up-regulated
ENSG00000273802	H2BC8	H2B clustered histone 8 [Source:HGNC Symbol;Acc:HGNC:4746]	-2.29553	1.51645	6.43551e-09	4.2418e-07	Down-regulated
ENSG00000136205	TNS3	tensin 3 [Source:HGNC Symbol;Acc:HGNC:21616]	1.12839	6.23228	6.59119e-09	4.32861e-07	Up-regulated
ENSG00000127993	RBM48	RNA binding motif protein 48 [Source:HGNC Symbol;Acc:HGNC:21785]	-1.45579	5.2846	6.73231e-09	4.40527e-07	Down-regulated
ENSG00000186716	BCR	BCR activator of RhoGEF and GTPase [Source:HGNC Symbol;Acc:HGNC:1014]	1.29502	4.71878	6.93476e-09	4.52136e-07	Up-regulated
ENSG00000100605	ITPK1	inositol-tetrakisphosphate 1-kinase [Source:HGNC Symbol;Acc:HGNC:6177]	1.76506	6.03178	7.00509e-09	4.55079e-07	Up-regulated
ENSG00000172183	ISG20	interferon stimulated exonuclease gene 20 [Source:HGNC Symbol;Acc:HGNC:6130]	-1.78271	2.55494	7.06157e-09	4.55589e-07	Down-regulated
ENSG00000139289	PHLDA1	pleckstrin homology like domain family A member 1 [Source:HGNC Symbol;Acc:HGNC:8933]	-1.31556	5.61704	7.13422e-09	4.58519e-07	Down-regulated
ENSG00000171759	PAH	phenylalanine hydroxylase [Source:HGNC Symbol;Acc:HGNC:8582]	1.45751	4.81572	7.26788e-09	4.63809e-07	Up-regulated
ENSG00000166002	SMCO4	single-pass membrane protein with coiled-coil domains 4 [Source:HGNC Symbol;Acc:HGNC:24810]	1.8324	2.82656	7.33165e-09	4.66231e-07	Up-regulated
ENSG00000270681	0	novel transcript, antisense to SH3D19	-1.94992	1.02199	7.63913e-09	4.81528e-07	Down-regulated
ENSG00000162437	RAVER2	ribonucleoprotein, PTB binding 2 [Source:HGNC Symbol;Acc:HGNC:25577]	1.07462	4.70571	7.64101e-09	4.81528e-07	Up-regulated
ENSG00000111731	C2CD5	C2 calcium dependent domain containing 5 [Source:HGNC Symbol;Acc:HGNC:29062]	1.16767	6.65747	7.65218e-09	4.81528e-07	Up-regulated
ENSG00000155792	DEPTOR	DEP domain containing MTOR interacting protein [Source:HGNC Symbol;Acc:HGNC:22953]	2.28414	3.48174	7.82655e-09	4.8852e-07	Up-regulated
ENSG00000145362	ANK2	ankyrin 2 [Source:HGNC Symbol;Acc:HGNC:493]	1.64736	4.58373	7.89403e-09	4.89918e-07	Up-regulated
ENSG00000073711	PPP2R3A	protein phosphatase 2 regulatory subunit B''alpha [Source:HGNC Symbol;Acc:HGNC:9307]	1.57624	5.14821	8.20955e-09	5.06022e-07	Up-regulated
ENSG00000213901	SLC23A3	solute carrier family 23 member 3 [Source:HGNC Symbol;Acc:HGNC:20601]	1.20102	5.6854	8.2455e-09	5.0651e-07	Up-regulated
ENSG00000068650	ATP11A	ATPase phospholipid transporting 11A [Source:HGNC Symbol;Acc:HGNC:13552]	1.03961	7.12946	8.33342e-09	5.10175e-07	Up-regulated
ENSG00000012061	ERCC1	ERCC excision repair 1, endonuclease non-catalytic subunit [Source:HGNC Symbol;Acc:HGNC:3433]	-1.71304	5.3233	8.39948e-09	5.12482e-07	Down-regulated
ENSG00000267898	0	novel transcript	-2.73829	1.94654	8.87203e-09	5.34096e-07	Down-regulated
ENSG00000220323	H2BC19P	H2B clustered histone 19, pseudogene [Source:HGNC Symbol;Acc:HGNC:20517]	-1.54622	5.25083	8.98179e-09	5.38908e-07	Down-regulated
ENSG00000175147	TMEM51-AS1	TMEM51 antisense RNA 1 [Source:HGNC Symbol;Acc:HGNC:26301]	1.07733	4.44346	9.01479e-09	5.39096e-07	Up-regulated
ENSG00000143207	COP1	COP1 E3 ubiquitin ligase [Source:HGNC Symbol;Acc:HGNC:17440]	1.05719	5.24427	9.18708e-09	5.47587e-07	Up-regulated
ENSG00000185432	METTL7A	methyltransferase like 7A [Source:HGNC Symbol;Acc:HGNC:24550]	1.67742	4.83481	9.22035e-09	5.47762e-07	Up-regulated
ENSG00000121671	CRY2	cryptochrome circadian regulator 2 [Source:HGNC Symbol;Acc:HGNC:2385]	-1.48134	6.52484	9.50796e-09	5.60715e-07	Down-regulated
ENSG00000164053	ATRIP	ATR interacting protein [Source:HGNC Symbol;Acc:HGNC:33499]	-1.59936	4.08964	9.53153e-09	5.60715e-07	Down-regulated
ENSG00000124299	PEPD	peptidase D [Source:HGNC Symbol;Acc:HGNC:8840]	2.13235	6.64384	9.61054e-09	5.63527e-07	Up-regulated
ENSG00000187699	C2orf88	chromosome 2 open reading frame 88 [Source:HGNC Symbol;Acc:HGNC:28191]	1.32721	3.69158	9.90957e-09	5.77312e-07	Up-regulated
ENSG00000138413	IDH1	isocitrate dehydrogenase (NADP(+)) 1 [Source:HGNC Symbol;Acc:HGNC:5382]	1.17621	8.3751	9.9632e-09	5.7857e-07	Up-regulated
ENSG00000117280	RAB29	RAB29, member RAS oncogene family [Source:HGNC Symbol;Acc:HGNC:9789]	1.08004	6.79337	1.00078e-08	5.79055e-07	Up-regulated
ENSG00000151150	ANK3	ankyrin 3 [Source:HGNC Symbol;Acc:HGNC:494]	1.35998	7.22093	1.00677e-08	5.79055e-07	Up-regulated
ENSG00000135476	ESPL1	extra spindle pole bodies like 1, separase [Source:HGNC Symbol;Acc:HGNC:16856]	1.39667	5.73783	1.0189e-08	5.83561e-07	Up-regulated
ENSG00000131051	RBM39	RNA binding motif protein 39 [Source:HGNC Symbol;Acc:HGNC:15923]	-1.2772	10.1331	1.02949e-08	5.86514e-07	Down-regulated
ENSG00000140948	ZCCHC14	zinc finger CCHC-type containing 14 [Source:HGNC Symbol;Acc:HGNC:24134]	1.03768	6.40199	1.05899e-08	6.01425e-07	Up-regulated
ENSG00000149179	C11orf49	chromosome 11 open reading frame 49 [Source:HGNC Symbol;Acc:HGNC:28720]	1.25777	4.82525	1.07272e-08	6.07313e-07	Up-regulated
ENSG00000123352	SPATS2	spermatogenesis associated serine rich 2 [Source:HGNC Symbol;Acc:HGNC:18650]	1.07949	5.32062	1.0867e-08	6.11394e-07	Up-regulated
ENSG00000178803	ADORA2A-AS1	ADORA2A antisense RNA 1 [Source:HGNC Symbol;Acc:HGNC:37122]	1.18815	4.68579	1.09508e-08	6.12297e-07	Up-regulated
ENSG00000148942	SLC5A12	solute carrier family 5 member 12 [Source:HGNC Symbol;Acc:HGNC:28750]	1.52648	4.98645	1.10787e-08	6.13897e-07	Up-regulated
ENSG00000157216	SSBP3	single stranded DNA binding protein 3 [Source:HGNC Symbol;Acc:HGNC:15674]	1.04311	4.95787	1.11154e-08	6.13897e-07	Up-regulated
ENSG00000233369	GTF2IP4	general transcription factor IIi pseudogene 4 [Source:HGNC Symbol;Acc:HGNC:51716]	1.07212	4.22925	1.11515e-08	6.1401e-07	Up-regulated
ENSG00000185361	TNFAIP8L1	TNF alpha induced protein 8 like 1 [Source:HGNC Symbol;Acc:HGNC:28279]	1.43765	5.34283	1.12428e-08	6.1716e-07	Up-regulated
ENSG00000145431	PDGFC	platelet derived growth factor C [Source:HGNC Symbol;Acc:HGNC:8801]	1.2457	4.74924	1.14222e-08	6.25108e-07	Up-regulated
ENSG00000173890	GPR160	G protein-coupled receptor 160 [Source:HGNC Symbol;Acc:HGNC:23693]	1.15994	7.31223	1.1579e-08	6.29868e-07	Up-regulated
ENSG00000125257	ABCC4	ATP binding cassette subfamily C member 4 [Source:HGNC Symbol;Acc:HGNC:55]	1.84323	4.30816	1.16446e-08	6.31534e-07	Up-regulated
ENSG00000101361	NOP56	NOP56 ribonucleoprotein [Source:HGNC Symbol;Acc:HGNC:15911]	-1.00757	7.85666	1.17547e-08	6.34479e-07	Down-regulated
ENSG00000230124	ACBD6	acyl-CoA binding domain containing 6 [Source:HGNC Symbol;Acc:HGNC:23339]	1.02002	4.80457	1.17691e-08	6.34479e-07	Up-regulated
ENSG00000150961	SEC24D	SEC24 homolog D, COPII coat complex component [Source:HGNC Symbol;Acc:HGNC:10706]	1.01116	5.19156	1.20191e-08	6.40311e-07	Up-regulated
ENSG00000167378	IRGQ	immunity related GTPase Q [Source:HGNC Symbol;Acc:HGNC:24868]	-1.16562	6.23053	1.20641e-08	6.40818e-07	Down-regulated
ENSG00000182158	CREB3L2	cAMP responsive element binding protein 3 like 2 [Source:HGNC Symbol;Acc:HGNC:23720]	1.15855	6.66219	1.21909e-08	6.4189e-07	Up-regulated
ENSG00000198382	UVRAG	UV radiation resistance associated [Source:HGNC Symbol;Acc:HGNC:12640]	1.1114	5.0566	1.22915e-08	6.45306e-07	Up-regulated
ENSG00000152127	MGAT5	alpha-1,6-mannosylglycoprotein 6-beta-N-acetylglucosaminyltransferase [Source:HGNC Symbol;Acc:HGNC:7049]	1.55701	5.98024	1.26729e-08	6.63398e-07	Up-regulated
ENSG00000140092	FBLN5	fibulin 5 [Source:HGNC Symbol;Acc:HGNC:3602]	1.58099	4.28284	1.29229e-08	6.70018e-07	Up-regulated
ENSG00000165959	CLMN	calmin [Source:HGNC Symbol;Acc:HGNC:19972]	1.49978	5.63571	1.29848e-08	6.70018e-07	Up-regulated
ENSG00000071051	NCK2	NCK adaptor protein 2 [Source:HGNC Symbol;Acc:HGNC:7665]	1.13296	6.24718	1.32682e-08	6.80751e-07	Up-regulated
ENSG00000158406	H4C8	H4 clustered histone 8 [Source:HGNC Symbol;Acc:HGNC:4788]	-2.11437	3.15929	1.40038e-08	7.08427e-07	Down-regulated
ENSG00000229005	HNF4A-AS1	HNF4A antisense RNA 1 [Source:HGNC Symbol;Acc:HGNC:49505]	2.46314	4.08982	1.41743e-08	7.15049e-07	Up-regulated
ENSG00000274750	H3C6	H3 clustered histone 6 [Source:HGNC Symbol;Acc:HGNC:4769]	-1.55673	5.00863	1.44689e-08	7.25858e-07	Down-regulated
ENSG00000184232	OAF	out at first homolog [Source:HGNC Symbol;Acc:HGNC:28752]	1.20505	6.18539	1.49139e-08	7.46109e-07	Up-regulated
ENSG00000136237	RAPGEF5	Rap guanine nucleotide exchange factor 5 [Source:HGNC Symbol;Acc:HGNC:16862]	1.19701	4.6288	1.50085e-08	7.48343e-07	Up-regulated
ENSG00000286656	0	novel transcript	-1.93821	1.01802	1.53869e-08	7.61336e-07	Down-regulated
ENSG00000141198	TOM1L1	target of myb1 like 1 membrane trafficking protein [Source:HGNC Symbol;Acc:HGNC:11983]	1.01408	6.21526	1.55494e-08	7.67272e-07	Up-regulated
ENSG00000071073	MGAT4A	alpha-1,3-mannosyl-glycoprotein 4-beta-N-acetylglucosaminyltransferase A [Source:HGNC Symbol;Acc:HGNC:7047]	1.38854	7.53029	1.59127e-08	7.80932e-07	Up-regulated
ENSG00000280135	0	TEC	1.99266	1.76847	1.61281e-08	7.89361e-07	Up-regulated
ENSG00000258122	0	novel transcript, antisense to CA7	2.77219	1.60159	1.6259e-08	7.93613e-07	Up-regulated
ENSG00000196639	HRH1	histamine receptor H1 [Source:HGNC Symbol;Acc:HGNC:5182]	-1.26054	3.73471	1.67126e-08	8.11368e-07	Down-regulated
ENSG00000160691	SHC1	SHC adaptor protein 1 [Source:HGNC Symbol;Acc:HGNC:10840]	-1.10833	6.55038	1.73773e-08	8.41379e-07	Down-regulated
ENSG00000285278	TFAP2A-AS2	TFAP2A antisense RNA 2 [Source:NCBI gene (formerly Entrezgene);Acc:109729173]	-2.07329	2.95656	1.77223e-08	8.55788e-07	Down-regulated
ENSG00000162104	ADCY9	adenylate cyclase 9 [Source:HGNC Symbol;Acc:HGNC:240]	1.35035	4.53701	1.78574e-08	8.6001e-07	Up-regulated
ENSG00000187210	GCNT1	glucosaminyl (N-acetyl) transferase 1 [Source:HGNC Symbol;Acc:HGNC:4203]	1.18795	5.36319	1.85552e-08	8.88618e-07	Up-regulated
ENSG00000135537	AFG1L	AFG1 like ATPase [Source:HGNC Symbol;Acc:HGNC:16411]	1.61413	3.68733	1.89133e-08	8.98879e-07	Up-regulated
ENSG00000196972	SMIM10L2B	small integral membrane protein 10 like 2B [Source:HGNC Symbol;Acc:HGNC:34500]	1.86968	2.47807	1.94065e-08	9.1749e-07	Up-regulated
ENSG00000114126	TFDP2	transcription factor Dp-2 [Source:HGNC Symbol;Acc:HGNC:11751]	1.08861	5.94027	2.00514e-08	9.36147e-07	Up-regulated
ENSG00000124224	PPP4R1L	protein phosphatase 4 regulatory subunit 1 like (pseudogene) [Source:HGNC Symbol;Acc:HGNC:15755]	-1.5	3.70897	2.00603e-08	9.36147e-07	Down-regulated
ENSG00000125901	MRPS26	mitochondrial ribosomal protein S26 [Source:HGNC Symbol;Acc:HGNC:14045]	1.14059	6.62604	2.04543e-08	9.47194e-07	Up-regulated
ENSG00000122787	AKR1D1	aldo-keto reductase family 1 member D1 [Source:HGNC Symbol;Acc:HGNC:388]	1.42005	4.36069	2.05645e-08	9.47533e-07	Up-regulated
ENSG00000076555	ACACB	acetyl-CoA carboxylase beta [Source:HGNC Symbol;Acc:HGNC:85]	1.33601	3.94772	2.06336e-08	9.48202e-07	Up-regulated
ENSG00000142227	EMP3	epithelial membrane protein 3 [Source:HGNC Symbol;Acc:HGNC:3335]	-1.51984	2.07257	2.0694e-08	9.48515e-07	Down-regulated
ENSG00000168795	ZBTB5	zinc finger and BTB domain containing 5 [Source:HGNC Symbol;Acc:HGNC:23836]	-1.06982	6.04908	2.07455e-08	9.48515e-07	Down-regulated
ENSG00000084110	HAL	histidine ammonia-lyase [Source:HGNC Symbol;Acc:HGNC:4806]	1.38945	4.82994	2.09623e-08	9.5601e-07	Up-regulated
ENSG00000164181	ELOVL7	ELOVL fatty acid elongase 7 [Source:HGNC Symbol;Acc:HGNC:26292]	1.04986	5.51953	2.10273e-08	9.56559e-07	Up-regulated
ENSG00000069535	MAOB	monoamine oxidase B [Source:HGNC Symbol;Acc:HGNC:6834]	1.31214	7.20066	2.11809e-08	9.59767e-07	Up-regulated
ENSG00000148339	SLC25A25	solute carrier family 25 member 25 [Source:HGNC Symbol;Acc:HGNC:20663]	-1.49222	4.92387	2.12042e-08	9.59767e-07	Down-regulated
ENSG00000197081	IGF2R	insulin like growth factor 2 receptor [Source:HGNC Symbol;Acc:HGNC:5467]	1.02322	8.18872	2.15754e-08	9.74129e-07	Up-regulated
ENSG00000152990	ADGRA3	adhesion G protein-coupled receptor A3 [Source:HGNC Symbol;Acc:HGNC:13839]	1.07218	5.37485	2.17664e-08	9.80301e-07	Up-regulated
ENSG00000073060	SCARB1	scavenger receptor class B member 1 [Source:HGNC Symbol;Acc:HGNC:1664]	1.06998	7.28663	2.23462e-08	1.00142e-06	Up-regulated
ENSG00000138449	SLC40A1	solute carrier family 40 member 1 [Source:HGNC Symbol;Acc:HGNC:10909]	1.1495	9.27817	2.24726e-08	1.00403e-06	Up-regulated
ENSG00000146038	DCDC2	doublecortin domain containing 2 [Source:HGNC Symbol;Acc:HGNC:18141]	1.06806	4.65241	2.25456e-08	1.00403e-06	Up-regulated
ENSG00000040341	STAU2	staufen double-stranded RNA binding protein 2 [Source:HGNC Symbol;Acc:HGNC:11371]	1.32446	4.75003	2.26268e-08	1.00403e-06	Up-regulated
ENSG00000162772	ATF3	activating transcription factor 3 [Source:HGNC Symbol;Acc:HGNC:785]	-1.7822	5.7323	2.31691e-08	1.02228e-06	Down-regulated
ENSG00000242028	HYPK	huntingtin interacting protein K [Source:HGNC Symbol;Acc:HGNC:18418]	-2.05964	4.00317	2.32079e-08	1.02228e-06	Down-regulated
ENSG00000198563	DDX39B	DExD-box helicase 39B [Source:HGNC Symbol;Acc:HGNC:13917]	-1.32382	8.13113	2.35402e-08	1.03439e-06	Down-regulated
ENSG00000235663	SAPCD1-AS1	SAPCD1 antisense RNA 1 [Source:HGNC Symbol;Acc:HGNC:39824]	-1.25972	2.73481	2.38054e-08	1.04326e-06	Down-regulated
ENSG00000067208	EVI5	ecotropic viral integration site 5 [Source:HGNC Symbol;Acc:HGNC:3501]	1.2515	4.00767	2.38576e-08	1.04326e-06	Up-regulated
ENSG00000143858	SYT2	synaptotagmin 2 [Source:HGNC Symbol;Acc:HGNC:11510]	2.4002	1.63823	2.40999e-08	1.04979e-06	Up-regulated
ENSG00000278291	0	novel transcript, antisense to IL17D	1.01547	3.18037	2.41231e-08	1.04979e-06	Up-regulated
ENSG00000156968	MPV17L	MPV17 mitochondrial inner membrane protein like [Source:HGNC Symbol;Acc:HGNC:26827]	1.31949	3.04325	2.46485e-08	1.06703e-06	Up-regulated
ENSG00000165895	ARHGAP42	Rho GTPase activating protein 42 [Source:HGNC Symbol;Acc:HGNC:26545]	1.3408	5.46385	2.47555e-08	1.06703e-06	Up-regulated
ENSG00000165494	PCF11	PCF11 cleavage and polyadenylation factor subunit [Source:HGNC Symbol;Acc:HGNC:30097]	-1.2839	8.06206	2.49399e-08	1.0704e-06	Down-regulated
ENSG00000149930	TAOK2	TAO kinase 2 [Source:HGNC Symbol;Acc:HGNC:16835]	-1.01258	6.25916	2.49523e-08	1.0704e-06	Down-regulated
ENSG00000162949	CAPN13	calpain 13 [Source:HGNC Symbol;Acc:HGNC:16663]	1.21551	4.38211	2.52275e-08	1.07964e-06	Up-regulated
ENSG00000068724	TTC7A	tetratricopeptide repeat domain 7A [Source:HGNC Symbol;Acc:HGNC:19750]	1.22046	5.69217	2.53588e-08	1.08086e-06	Up-regulated
ENSG00000135917	SLC19A3	solute carrier family 19 member 3 [Source:HGNC Symbol;Acc:HGNC:16266]	1.1023	7.66786	2.54355e-08	1.08086e-06	Up-regulated
ENSG00000125462	MIR9-1HG	MIR9-1 host gene [Source:HGNC Symbol;Acc:HGNC:30780]	-2.18594	2.2317	2.54682e-08	1.08086e-06	Down-regulated
ENSG00000154978	VOPP1	VOPP1 WW domain binding protein [Source:HGNC Symbol;Acc:HGNC:34518]	1.15055	2.97519	2.54953e-08	1.08086e-06	Up-regulated
ENSG00000111885	MAN1A1	mannosidase alpha class 1A member 1 [Source:HGNC Symbol;Acc:HGNC:6821]	1.39487	7.21219	2.57053e-08	1.08549e-06	Up-regulated
ENSG00000196754	S100A2	S100 calcium binding protein A2 [Source:HGNC Symbol;Acc:HGNC:10492]	-2.82148	0.724329	2.57391e-08	1.08549e-06	Down-regulated
ENSG00000106688	SLC1A1	solute carrier family 1 member 1 [Source:HGNC Symbol;Acc:HGNC:10939]	1.24197	7.17049	2.5785e-08	1.08549e-06	Up-regulated
ENSG00000165046	LETM2	leucine zipper and EF-hand containing transmembrane protein 2 [Source:HGNC Symbol;Acc:HGNC:14648]	-1.77812	1.70568	2.60094e-08	1.0924e-06	Down-regulated
ENSG00000111879	FAM184A	family with sequence similarity 184 member A [Source:HGNC Symbol;Acc:HGNC:20991]	1.44812	3.88448	2.66419e-08	1.11378e-06	Up-regulated
ENSG00000050405	LIMA1	LIM domain and actin binding 1 [Source:HGNC Symbol;Acc:HGNC:24636]	1.095	8.78799	2.69674e-08	1.12003e-06	Up-regulated
ENSG00000167780	SOAT2	sterol O-acyltransferase 2 [Source:HGNC Symbol;Acc:HGNC:11178]	1.32711	6.23902	2.7366e-08	1.13096e-06	Up-regulated
ENSG00000183682	BMP8A	bone morphogenetic protein 8a [Source:HGNC Symbol;Acc:HGNC:21650]	1.45963	2.73523	2.8029e-08	1.15173e-06	Up-regulated
ENSG00000117597	UTP25	UTP25 small subunit processor component [Source:HGNC Symbol;Acc:HGNC:28440]	-1.16503	5.44661	2.83578e-08	1.15867e-06	Down-regulated
ENSG00000173451	THAP2	THAP domain containing 2 [Source:HGNC Symbol;Acc:HGNC:20854]	-1.71172	3.47693	2.86031e-08	1.16345e-06	Down-regulated
ENSG00000273759	0	novel transcript	-1.78633	2.79873	2.96974e-08	1.19986e-06	Down-regulated
ENSG00000113494	PRLR	prolactin receptor [Source:HGNC Symbol;Acc:HGNC:9446]	1.41415	6.30239	3.02181e-08	1.21817e-06	Up-regulated
ENSG00000198373	WWP2	WW domain containing E3 ubiquitin protein ligase 2 [Source:HGNC Symbol;Acc:HGNC:16804]	1.25372	5.20561	3.04334e-08	1.22411e-06	Up-regulated
ENSG00000184619	KRBA2	KRAB-A domain containing 2 [Source:HGNC Symbol;Acc:HGNC:26989]	-1.79132	2.85006	3.06158e-08	1.22871e-06	Down-regulated
ENSG00000198944	SOWAHA	sosondowah ankyrin repeat domain family member A [Source:HGNC Symbol;Acc:HGNC:27033]	1.0148	5.39683	3.11185e-08	1.24255e-06	Up-regulated
ENSG00000135090	TAOK3	TAO kinase 3 [Source:HGNC Symbol;Acc:HGNC:18133]	1.20234	6.10801	3.17354e-08	1.26243e-06	Up-regulated
ENSG00000156958	GALK2	galactokinase 2 [Source:HGNC Symbol;Acc:HGNC:4119]	1.13162	5.12447	3.23583e-08	1.28438e-06	Up-regulated
ENSG00000247315	ZCCHC3	zinc finger CCHC-type containing 3 [Source:HGNC Symbol;Acc:HGNC:16230]	-1.21626	6.08738	3.29349e-08	1.30154e-06	Down-regulated
ENSG00000246695	RASSF8-AS1	RASSF8 antisense RNA 1 [Source:HGNC Symbol;Acc:HGNC:48637]	-1.46562	2.03632	3.3305e-08	1.31329e-06	Down-regulated
ENSG00000120029	ARMH3	armadillo like helical domain containing 3 [Source:HGNC Symbol;Acc:HGNC:25788]	1.04121	4.71584	3.35422e-08	1.31976e-06	Up-regulated
ENSG00000259953	0	novel transcript, overlapping SUSD1	1.15095	4.0091	3.46115e-08	1.353e-06	Up-regulated
ENSG00000183044	ABAT	4-aminobutyrate aminotransferase [Source:HGNC Symbol;Acc:HGNC:23]	1.17476	5.36737	3.60579e-08	1.39744e-06	Up-regulated
ENSG00000109083	IFT20	intraflagellar transport 20 [Source:HGNC Symbol;Acc:HGNC:30989]	-1.0941	5.55637	3.61878e-08	1.39947e-06	Down-regulated
ENSG00000183688	RFLNB	refilin B [Source:HGNC Symbol;Acc:HGNC:28705]	1.17164	5.03011	3.87991e-08	1.48142e-06	Up-regulated
ENSG00000132680	KHDC4	KH domain containing 4, pre-mRNA splicing factor [Source:HGNC Symbol;Acc:HGNC:29145]	-1.17721	6.84573	3.92389e-08	1.49505e-06	Down-regulated
ENSG00000006534	ALDH3B1	aldehyde dehydrogenase 3 family member B1 [Source:HGNC Symbol;Acc:HGNC:410]	1.0684	5.60972	4.03213e-08	1.52984e-06	Up-regulated
ENSG00000135929	CYP27A1	cytochrome P450 family 27 subfamily A member 1 [Source:HGNC Symbol;Acc:HGNC:2605]	1.32347	7.40862	4.0711e-08	1.54138e-06	Up-regulated
ENSG00000186666	BCDIN3D	BCDIN3 domain containing RNA methyltransferase [Source:HGNC Symbol;Acc:HGNC:27050]	-1.41891	5.08857	4.09459e-08	1.54703e-06	Down-regulated
ENSG00000187242	KRT12	keratin 12 [Source:HGNC Symbol;Acc:HGNC:6414]	-2.343	2.33264	4.14667e-08	1.56344e-06	Down-regulated
ENSG00000121380	BCL2L14	BCL2 like 14 [Source:HGNC Symbol;Acc:HGNC:16657]	1.26956	5.38147	4.2549e-08	1.59758e-06	Up-regulated
ENSG00000132437	DDC	dopa decarboxylase [Source:HGNC Symbol;Acc:HGNC:2719]	1.34604	6.81657	4.40101e-08	1.64694e-06	Up-regulated
ENSG00000177119	ANO6	anoctamin 6 [Source:HGNC Symbol;Acc:HGNC:25240]	1.29905	8.66744	4.41704e-08	1.64694e-06	Up-regulated
ENSG00000139190	VAMP1	vesicle associated membrane protein 1 [Source:HGNC Symbol;Acc:HGNC:12642]	-1.42631	4.51214	4.42501e-08	1.64694e-06	Down-regulated
ENSG00000168612	ZSWIM1	zinc finger SWIM-type containing 1 [Source:HGNC Symbol;Acc:HGNC:16155]	-1.22914	5.65487	4.42733e-08	1.64694e-06	Down-regulated
ENSG00000107984	DKK1	dickkopf WNT signaling pathway inhibitor 1 [Source:HGNC Symbol;Acc:HGNC:2891]	-1.79948	4.76792	4.43197e-08	1.64694e-06	Down-regulated
ENSG00000110497	AMBRA1	autophagy and beclin 1 regulator 1 [Source:HGNC Symbol;Acc:HGNC:25990]	1.05035	5.05799	4.53015e-08	1.67848e-06	Up-regulated
ENSG00000170456	DENND5B	DENN domain containing 5B [Source:HGNC Symbol;Acc:HGNC:28338]	1.44475	6.91235	4.55009e-08	1.68029e-06	Up-regulated
ENSG00000205476	CCDC85C	coiled-coil domain containing 85C [Source:HGNC Symbol;Acc:HGNC:35459]	1.13892	6.02941	4.55891e-08	1.68029e-06	Up-regulated
ENSG00000197063	MAFG	MAF bZIP transcription factor G [Source:HGNC Symbol;Acc:HGNC:6781]	-1.50568	6.00042	4.59711e-08	1.68171e-06	Down-regulated
ENSG00000078043	PIAS2	protein inhibitor of activated STAT 2 [Source:HGNC Symbol;Acc:HGNC:17311]	1.1579	4.32771	4.61857e-08	1.68171e-06	Up-regulated
ENSG00000069424	KCNAB2	potassium voltage-gated channel subfamily A regulatory beta subunit 2 [Source:HGNC Symbol;Acc:HGNC:6229]	1.3445	4.16317	4.61865e-08	1.68171e-06	Up-regulated
ENSG00000123975	CKS2	CDC28 protein kinase regulatory subunit 2 [Source:HGNC Symbol;Acc:HGNC:2000]	-1.18616	3.83203	4.72453e-08	1.7168e-06	Down-regulated
ENSG00000103043	VAC14	VAC14 component of PIKFYVE complex [Source:HGNC Symbol;Acc:HGNC:25507]	1.14788	5.19846	4.7552e-08	1.72448e-06	Up-regulated
ENSG00000272008	0	novel transcript, antisense to ZNF292	-2.02969	1.54108	4.78448e-08	1.73162e-06	Down-regulated
ENSG00000118507	AKAP7	A-kinase anchoring protein 7 [Source:HGNC Symbol;Acc:HGNC:377]	1.41512	7.43319	4.91006e-08	1.76058e-06	Up-regulated
ENSG00000106780	MEGF9	multiple EGF like domains 9 [Source:HGNC Symbol;Acc:HGNC:3234]	1.46506	4.27643	4.91049e-08	1.76058e-06	Up-regulated
ENSG00000021826	CPS1	carbamoyl-phosphate synthase 1 [Source:HGNC Symbol;Acc:HGNC:2323]	1.55396	6.65991	4.9241e-08	1.76058e-06	Up-regulated
ENSG00000108733	PEX12	peroxisomal biogenesis factor 12 [Source:HGNC Symbol;Acc:HGNC:8854]	-1.35835	4.16671	4.98503e-08	1.77224e-06	Down-regulated
ENSG00000197892	KIF13B	kinesin family member 13B [Source:HGNC Symbol;Acc:HGNC:14405]	1.18263	6.37616	5.00752e-08	1.77491e-06	Up-regulated
ENSG00000146826	TRAPPC14	trafficking protein particle complex subunit 14 [Source:HGNC Symbol;Acc:HGNC:25604]	-1.5238	4.2343	5.05037e-08	1.78254e-06	Down-regulated
ENSG00000146285	SCML4	Scm polycomb group protein like 4 [Source:HGNC Symbol;Acc:HGNC:21397]	1.96556	4.27092	5.05348e-08	1.78254e-06	Up-regulated
ENSG00000108515	ENO3	enolase 3 [Source:HGNC Symbol;Acc:HGNC:3354]	-1.86019	3.60033	5.21759e-08	1.83326e-06	Down-regulated
ENSG00000164237	CMBL	carboxymethylenebutenolidase homolog [Source:HGNC Symbol;Acc:HGNC:25090]	1.17385	4.23471	5.32679e-08	1.86438e-06	Up-regulated
ENSG00000079974	RABL2B	RAB, member of RAS oncogene family like 2B [Source:HGNC Symbol;Acc:HGNC:9800]	-1.077	3.9314	5.40524e-08	1.88453e-06	Down-regulated
ENSG00000165140	FBP1	fructose-bisphosphatase 1 [Source:HGNC Symbol;Acc:HGNC:3606]	1.96821	5.19461	5.61823e-08	1.94751e-06	Up-regulated
ENSG00000054611	TBC1D22A	TBC1 domain family member 22A [Source:HGNC Symbol;Acc:HGNC:1309]	1.11917	4.50562	5.69254e-08	1.96828e-06	Up-regulated
ENSG00000186074	CD300LF	CD300 molecule like family member f [Source:HGNC Symbol;Acc:HGNC:29883]	1.38393	2.12555	5.70509e-08	1.96828e-06	Up-regulated
ENSG00000122257	RBBP6	RB binding protein 6, ubiquitin ligase [Source:HGNC Symbol;Acc:HGNC:9889]	-1.32845	7.55972	5.71086e-08	1.96828e-06	Down-regulated
ENSG00000289352	0	novel transcript, antisense to IQCE	1.46746	3.64005	5.7612e-08	1.97571e-06	Up-regulated
ENSG00000152078	TLCD4	TLC domain containing 4 [Source:HGNC Symbol;Acc:HGNC:26477]	1.06648	4.2769	5.76524e-08	1.97571e-06	Up-regulated
ENSG00000169902	TPST1	tyrosylprotein sulfotransferase 1 [Source:HGNC Symbol;Acc:HGNC:12020]	1.12548	3.99743	5.79204e-08	1.98114e-06	Up-regulated
ENSG00000204316	MRPL38	mitochondrial ribosomal protein L38 [Source:HGNC Symbol;Acc:HGNC:14033]	-1.99036	2.77188	5.82739e-08	1.98946e-06	Down-regulated
ENSG00000184992	BRI3BP	BRI3 binding protein [Source:HGNC Symbol;Acc:HGNC:14251]	1.10008	6.2706	5.9066e-08	2.00944e-06	Up-regulated
ENSG00000088386	SLC15A1	solute carrier family 15 member 1 [Source:HGNC Symbol;Acc:HGNC:10920]	1.00704	8.50561	6.06013e-08	2.04955e-06	Up-regulated
ENSG00000172728	FUT10	fucosyltransferase 10 [Source:HGNC Symbol;Acc:HGNC:19234]	1.20087	4.08649	6.12178e-08	2.06267e-06	Up-regulated
ENSG00000272734	ADIRF-AS1	ADIRF antisense RNA 1 [Source:HGNC Symbol;Acc:HGNC:45127]	-1.09919	5.5607	6.14411e-08	2.06292e-06	Down-regulated
ENSG00000198517	MAFK	MAF bZIP transcription factor K [Source:HGNC Symbol;Acc:HGNC:6782]	-1.21562	5.20901	6.19357e-08	2.07525e-06	Down-regulated
ENSG00000142583	SLC2A5	solute carrier family 2 member 5 [Source:HGNC Symbol;Acc:HGNC:11010]	1.08383	8.76232	6.27681e-08	2.09855e-06	Up-regulated
ENSG00000236130	PTCSC2	papillary thyroid carcinoma susceptibility candidate 2 [Source:HGNC Symbol;Acc:HGNC:44086]	1.30444	3.25914	6.39857e-08	2.12033e-06	Up-regulated
ENSG00000137642	SORL1	sortilin related receptor 1 [Source:HGNC Symbol;Acc:HGNC:11185]	1.15174	10.2999	6.41556e-08	2.12207e-06	Up-regulated
ENSG00000135083	CCNJL	cyclin J like [Source:HGNC Symbol;Acc:HGNC:25876]	1.39031	5.64208	6.50487e-08	2.14675e-06	Up-regulated
ENSG00000120162	MOB3B	MOB kinase activator 3B [Source:HGNC Symbol;Acc:HGNC:23825]	1.41677	3.32065	6.51817e-08	2.14675e-06	Up-regulated
ENSG00000115841	RMDN2	regulator of microtubule dynamics 2 [Source:HGNC Symbol;Acc:HGNC:26567]	1.31129	2.45053	6.57003e-08	2.15736e-06	Up-regulated
ENSG00000224152	0	novel transcript, antisense to BAZ2B	-1.12747	3.86856	6.59956e-08	2.1592e-06	Down-regulated
ENSG00000175772	LINC01106	long intergenic non-protein coding RNA 1106 [Source:HGNC Symbol;Acc:HGNC:26769]	1.19901	3.69495	6.65623e-08	2.17381e-06	Up-regulated
ENSG00000153551	CMTM7	CKLF like MARVEL transmembrane domain containing 7 [Source:HGNC Symbol;Acc:HGNC:19178]	1.15327	3.7253	6.67381e-08	2.17561e-06	Up-regulated
ENSG00000166444	DENND2B	DENN domain containing 2B [Source:HGNC Symbol;Acc:HGNC:11350]	1.33048	3.92882	6.74346e-08	2.19041e-06	Up-regulated
ENSG00000124145	SDC4	syndecan 4 [Source:HGNC Symbol;Acc:HGNC:10661]	-1.03684	8.67198	6.79021e-08	2.19516e-06	Down-regulated
ENSG00000253736	0	novel transcript, antisense to DUSP1	-1.48014	1.962	6.79454e-08	2.19516e-06	Down-regulated
ENSG00000115919	KYNU	kynureninase [Source:HGNC Symbol;Acc:HGNC:6469]	1.83984	2.99835	6.8492e-08	2.20887e-06	Up-regulated
ENSG00000277895	0	novel transcript, antisense to TBK1	-2.69181	0.0570687	6.9995e-08	2.24531e-06	Down-regulated
ENSG00000075643	MOCOS	molybdenum cofactor sulfurase [Source:HGNC Symbol;Acc:HGNC:18234]	1.1912	2.75498	7.045e-08	2.2559e-06	Up-regulated
ENSG00000233937	CTC-338M12.4	uncharacterized LOC101928649 [Source:NCBI gene (formerly Entrezgene);Acc:101928649]	-1.03731	4.25607	7.26932e-08	2.31054e-06	Down-regulated
ENSG00000204588	LINC01123	long intergenic non-protein coding RNA 1123 [Source:HGNC Symbol;Acc:HGNC:49269]	1.19776	4.12167	7.45178e-08	2.3569e-06	Up-regulated
ENSG00000124212	PTGIS	prostaglandin I2 synthase [Source:HGNC Symbol;Acc:HGNC:9603]	1.75419	2.15648	7.77468e-08	2.43346e-06	Up-regulated
ENSG00000247699	FABP6-AS1	FABP6 antisense RNA 1 [Source:HGNC Symbol;Acc:HGNC:40226]	1.09695	5.01772	7.82183e-08	2.44174e-06	Up-regulated
ENSG00000178425	NT5DC1	5'-nucleotidase domain containing 1 [Source:HGNC Symbol;Acc:HGNC:21556]	1.02537	6.6844	7.96473e-08	2.48005e-06	Up-regulated
ENSG00000261094	0	novel transcript	-1.50913	3.54782	8.29299e-08	2.55583e-06	Down-regulated
ENSG00000188266	HYKK	hydroxylysine kinase [Source:HGNC Symbol;Acc:HGNC:34403]	1.02812	3.59571	8.37684e-08	2.57407e-06	Up-regulated
ENSG00000131480	AOC2	amine oxidase copper containing 2 [Source:HGNC Symbol;Acc:HGNC:549]	-1.5587	2.91928	8.39333e-08	2.57407e-06	Down-regulated
ENSG00000108187	PBLD	phenazine biosynthesis like protein domain containing [Source:HGNC Symbol;Acc:HGNC:23301]	1.11077	9.31742	8.82143e-08	2.68207e-06	Up-regulated
ENSG00000163581	SLC2A2	solute carrier family 2 member 2 [Source:HGNC Symbol;Acc:HGNC:11006]	1.59294	4.86056	9.12714e-08	2.76107e-06	Up-regulated
ENSG00000012504	NR1H4	nuclear receptor subfamily 1 group H member 4 [Source:HGNC Symbol;Acc:HGNC:7967]	1.33646	5.13823	9.26942e-08	2.79009e-06	Up-regulated
ENSG00000110002	VWA5A	von Willebrand factor A domain containing 5A [Source:HGNC Symbol;Acc:HGNC:6658]	-1.6017	2.64056	9.40613e-08	2.82653e-06	Down-regulated
ENSG00000122870	BICC1	BicC family RNA binding protein 1 [Source:HGNC Symbol;Acc:HGNC:19351]	1.28057	5.91338	9.55074e-08	2.85573e-06	Up-regulated
ENSG00000246130	0	novel transcript	-2.92161	0.61259	9.68595e-08	2.88857e-06	Down-regulated
ENSG00000125772	GPCPD1	glycerophosphocholine phosphodiesterase 1 [Source:HGNC Symbol;Acc:HGNC:26957]	-1.03066	3.54488	9.69256e-08	2.88857e-06	Down-regulated
ENSG00000186834	HEXIM1	HEXIM P-TEFb complex subunit 1 [Source:HGNC Symbol;Acc:HGNC:24953]	-1.1603	7.54921	9.92219e-08	2.93917e-06	Down-regulated
ENSG00000137434	C6orf52	chromosome 6 open reading frame 52 [Source:HGNC Symbol;Acc:HGNC:20881]	-1.88875	1.38703	1.00945e-07	2.97879e-06	Down-regulated
ENSG00000146376	ARHGAP18	Rho GTPase activating protein 18 [Source:HGNC Symbol;Acc:HGNC:21035]	1.15359	6.74163	1.0393e-07	3.05199e-06	Up-regulated
ENSG00000125650	PSPN	persephin [Source:HGNC Symbol;Acc:HGNC:9579]	-1.75639	2.96136	1.04169e-07	3.05405e-06	Down-regulated
ENSG00000133135	RNF128	ring finger protein 128 [Source:HGNC Symbol;Acc:HGNC:21153]	1.04712	7.76812	1.04958e-07	3.07025e-06	Up-regulated
ENSG00000089199	CHGB	chromogranin B [Source:HGNC Symbol;Acc:HGNC:1930]	-1.53354	2.08044	1.0509e-07	3.07025e-06	Down-regulated
ENSG00000068976	PYGM	glycogen phosphorylase, muscle associated [Source:HGNC Symbol;Acc:HGNC:9726]	-1.92138	3.32504	1.05232e-07	3.07025e-06	Down-regulated
ENSG00000112599	GUCA1B	guanylate cyclase activator 1B [Source:HGNC Symbol;Acc:HGNC:4679]	-1.38669	3.11956	1.05823e-07	3.07756e-06	Down-regulated
ENSG00000153936	HS2ST1	heparan sulfate 2-O-sulfotransferase 1 [Source:HGNC Symbol;Acc:HGNC:5193]	1.14276	5.86897	1.06485e-07	3.09184e-06	Up-regulated
ENSG00000172731	LRRC20	leucine rich repeat containing 20 [Source:HGNC Symbol;Acc:HGNC:23421]	1.23663	4.20185	1.06694e-07	3.09292e-06	Up-regulated
ENSG00000152270	PDE3B	phosphodiesterase 3B [Source:HGNC Symbol;Acc:HGNC:8779]	1.29933	4.3394	1.0786e-07	3.11447e-06	Up-regulated
ENSG00000243279	PRAF2	PRA1 domain family member 2 [Source:HGNC Symbol;Acc:HGNC:28911]	-1.69694	1.46987	1.12348e-07	3.22578e-06	Down-regulated
ENSG00000107779	BMPR1A	bone morphogenetic protein receptor type 1A [Source:HGNC Symbol;Acc:HGNC:1076]	1.09761	4.2987	1.14873e-07	3.27779e-06	Up-regulated
ENSG00000166974	MAPRE2	microtubule associated protein RP/EB family member 2 [Source:HGNC Symbol;Acc:HGNC:6891]	1.01684	4.42541	1.17951e-07	3.34936e-06	Up-regulated
ENSG00000164182	NDUFAF2	NADH:ubiquinone oxidoreductase complex assembly factor 2 [Source:HGNC Symbol;Acc:HGNC:28086]	1.10224	3.80142	1.26163e-07	3.55461e-06	Up-regulated
ENSG00000184640	SEPTIN9	septin 9 [Source:HGNC Symbol;Acc:HGNC:7323]	1.09051	6.83575	1.2701e-07	3.57289e-06	Up-regulated
ENSG00000138623	SEMA7A	semaphorin 7A (John Milton Hagen blood group) [Source:HGNC Symbol;Acc:HGNC:10741]	-1.25386	2.90015	1.28699e-07	3.61477e-06	Down-regulated
ENSG00000268635	0	novel transcript, antisense to PAK1	-2.59776	0.411717	1.29652e-07	3.6359e-06	Down-regulated
ENSG00000186812	ZNF397	zinc finger protein 397 [Source:HGNC Symbol;Acc:HGNC:18818]	-1.0477	4.35153	1.31644e-07	3.68603e-06	Down-regulated
ENSG00000183840	GPR39	G protein-coupled receptor 39 [Source:HGNC Symbol;Acc:HGNC:4496]	1.63324	3.71755	1.351e-07	3.75371e-06	Up-regulated
ENSG00000108984	MAP2K6	mitogen-activated protein kinase kinase 6 [Source:HGNC Symbol;Acc:HGNC:6846]	1.03523	4.52354	1.39376e-07	3.86063e-06	Up-regulated
ENSG00000163625	WDFY3	WD repeat and FYVE domain containing 3 [Source:HGNC Symbol;Acc:HGNC:20751]	1.06941	5.17609	1.40768e-07	3.87728e-06	Up-regulated
ENSG00000198513	ATL1	atlastin GTPase 1 [Source:HGNC Symbol;Acc:HGNC:11231]	2.2696	2.54461	1.43845e-07	3.94208e-06	Up-regulated
ENSG00000260708	TBC1D22A-DT	TBC1D22A divergent transcript [Source:HGNC Symbol;Acc:HGNC:55388]	-1.90479	4.28223	1.45875e-07	3.98564e-06	Down-regulated
ENSG00000276900	0	novel transcript, antisense to AMN1	-1.00166	4.1208	1.47333e-07	4.01885e-06	Down-regulated
ENSG00000126858	RHOT1	ras homolog family member T1 [Source:HGNC Symbol;Acc:HGNC:21168]	1.00569	5.77181	1.48677e-07	4.04384e-06	Up-regulated
ENSG00000286733	LINC02348	long intergenic non-protein coding RNA 2348 [Source:NCBI gene (formerly Entrezgene);Acc:101927505]	1.25532	5.66337	1.49363e-07	4.05639e-06	Up-regulated
ENSG00000116667	C1orf21	chromosome 1 open reading frame 21 [Source:HGNC Symbol;Acc:HGNC:15494]	1.13457	4.82305	1.52316e-07	4.12174e-06	Up-regulated
ENSG00000013441	CLK1	CDC like kinase 1 [Source:HGNC Symbol;Acc:HGNC:2068]	-1.1454	7.19584	1.53464e-07	4.14285e-06	Down-regulated
ENSG00000164124	TMEM144	transmembrane protein 144 [Source:HGNC Symbol;Acc:HGNC:25633]	1.18516	6.29851	1.57102e-07	4.2284e-06	Up-regulated
ENSG00000151834	GABRA2	gamma-aminobutyric acid type A receptor subunit alpha2 [Source:HGNC Symbol;Acc:HGNC:4076]	1.11325	7.55984	1.60769e-07	4.30147e-06	Up-regulated
ENSG00000158467	AHCYL2	adenosylhomocysteinase like 2 [Source:HGNC Symbol;Acc:HGNC:22204]	1.06182	5.23156	1.64333e-07	4.38383e-06	Up-regulated
ENSG00000111424	VDR	vitamin D receptor [Source:HGNC Symbol;Acc:HGNC:12679]	1.75676	5.06494	1.70648e-07	4.53889e-06	Up-regulated
ENSG00000005238	FAM214B	family with sequence similarity 214 member B [Source:HGNC Symbol;Acc:HGNC:25666]	-1.24069	5.05405	1.71366e-07	4.55127e-06	Down-regulated
ENSG00000198353	HOXC4	homeobox C4 [Source:HGNC Symbol;Acc:HGNC:5126]	1.49739	3.75349	1.72371e-07	4.56455e-06	Up-regulated
ENSG00000158966	CACHD1	cache domain containing 1 [Source:HGNC Symbol;Acc:HGNC:29314]	1.20973	4.45915	1.75042e-07	4.62173e-06	Up-regulated
ENSG00000107742	SPOCK2	SPARC (osteonectin), cwcv and kazal like domains proteoglycan 2 [Source:HGNC Symbol;Acc:HGNC:13564]	-2.18544	1.79865	1.77081e-07	4.66724e-06	Down-regulated
ENSG00000169507	SLC38A11	solute carrier family 38 member 11 [Source:HGNC Symbol;Acc:HGNC:26836]	1.29082	3.50103	1.79594e-07	4.70916e-06	Up-regulated
ENSG00000005469	CROT	carnitine O-octanoyltransferase [Source:HGNC Symbol;Acc:HGNC:2366]	1.07725	5.5516	1.79918e-07	4.70916e-06	Up-regulated
ENSG00000169562	GJB1	gap junction protein beta 1 [Source:HGNC Symbol;Acc:HGNC:4283]	1.14629	6.16042	1.83358e-07	4.77083e-06	Up-regulated
ENSG00000144040	SFXN5	sideroflexin 5 [Source:HGNC Symbol;Acc:HGNC:16073]	1.09748	5.14344	1.84529e-07	4.7882e-06	Up-regulated
ENSG00000156026	MCU	mitochondrial calcium uniporter [Source:HGNC Symbol;Acc:HGNC:23526]	1.01024	5.42678	1.95402e-07	5.027e-06	Up-regulated
ENSG00000117036	ETV3	ETS variant transcription factor 3 [Source:HGNC Symbol;Acc:HGNC:3492]	-1.20579	6.07021	1.96563e-07	5.02824e-06	Down-regulated
ENSG00000166840	GLYATL1	glycine-N-acyltransferase like 1 [Source:HGNC Symbol;Acc:HGNC:30519]	1.10648	3.85396	2.00448e-07	5.11313e-06	Up-regulated
ENSG00000213937	CLDN9	claudin 9 [Source:HGNC Symbol;Acc:HGNC:2051]	-2.14071	1.45518	2.06018e-07	5.23133e-06	Down-regulated
ENSG00000104299	INTS9	integrator complex subunit 9 [Source:HGNC Symbol;Acc:HGNC:25592]	1.00124	3.84774	2.06275e-07	5.23133e-06	Up-regulated
ENSG00000162337	LRP5	LDL receptor related protein 5 [Source:HGNC Symbol;Acc:HGNC:6697]	1.29628	6.04814	2.0653e-07	5.23133e-06	Up-regulated
ENSG00000137819	PAQR5	progestin and adipoQ receptor family member 5 [Source:HGNC Symbol;Acc:HGNC:29645]	1.06619	3.9529	2.089e-07	5.2734e-06	Up-regulated
ENSG00000279088	0	TEC	-1.28612	4.22852	2.12851e-07	5.3302e-06	Down-regulated
ENSG00000172572	PDE3A	phosphodiesterase 3A [Source:HGNC Symbol;Acc:HGNC:8778]	1.70401	4.33126	2.1309e-07	5.3302e-06	Up-regulated
ENSG00000121101	TEX14	testis expressed 14, intercellular bridge forming factor [Source:HGNC Symbol;Acc:HGNC:11737]	-1.77079	3.4355	2.14166e-07	5.34971e-06	Down-regulated
ENSG00000181026	AEN	apoptosis enhancing nuclease [Source:HGNC Symbol;Acc:HGNC:25722]	-1.40451	3.69467	2.16919e-07	5.38866e-06	Down-regulated
ENSG00000154511	DIPK1A	divergent protein kinase domain 1A [Source:HGNC Symbol;Acc:HGNC:32213]	1.39616	3.19141	2.18807e-07	5.42065e-06	Up-regulated
ENSG00000286585	0	novel transcript	-1.56939	1.58672	2.21279e-07	5.47438e-06	Down-regulated
ENSG00000155846	PPARGC1B	PPARG coactivator 1 beta [Source:HGNC Symbol;Acc:HGNC:30022]	1.1091	4.78764	2.23667e-07	5.52195e-06	Up-regulated
ENSG00000106772	PRUNE2	prune homolog 2 with BCH domain [Source:HGNC Symbol;Acc:HGNC:25209]	1.66945	1.9166	2.23813e-07	5.52195e-06	Up-regulated
ENSG00000137221	TJAP1	tight junction associated protein 1 [Source:HGNC Symbol;Acc:HGNC:17949]	-1.23788	5.19785	2.24279e-07	5.52588e-06	Down-regulated
ENSG00000104537	ANXA13	annexin A13 [Source:HGNC Symbol;Acc:HGNC:536]	1.44574	6.07873	2.24877e-07	5.53158e-06	Up-regulated
ENSG00000288559	0	novel transcript	-1.69783	2.98952	2.28609e-07	5.602e-06	Down-regulated
ENSG00000260233	ZNRD2-DT	ZNRD2 divergent transcript [Source:HGNC Symbol;Acc:HGNC:27384]	-1.71794	2.63797	2.36329e-07	5.729e-06	Down-regulated
ENSG00000174132	FAM174A	family with sequence similarity 174 member A [Source:HGNC Symbol;Acc:HGNC:24943]	1.22954	2.64431	2.41785e-07	5.82219e-06	Up-regulated
ENSG00000184281	TSSC4	tumor suppressing subtransferable candidate 4 [Source:HGNC Symbol;Acc:HGNC:12386]	-1.87141	4.00907	2.43102e-07	5.84611e-06	Down-regulated
ENSG00000130165	ELOF1	elongation factor 1 homolog [Source:HGNC Symbol;Acc:HGNC:28691]	-1.2251	5.0836	2.46516e-07	5.91245e-06	Down-regulated
ENSG00000287620	0	novel transcript	-2.27331	0.913749	2.49079e-07	5.96599e-06	Down-regulated
ENSG00000090565	RAB11FIP3	RAB11 family interacting protein 3 [Source:HGNC Symbol;Acc:HGNC:17224]	1.12627	5.48859	2.50223e-07	5.98547e-06	Up-regulated
ENSG00000134815	DHX34	DExH-box helicase 34 [Source:HGNC Symbol;Acc:HGNC:16719]	-1.10514	4.52554	2.50604e-07	5.98665e-06	Down-regulated
ENSG00000240053	LY6G5B	lymphocyte antigen 6 family member G5B [Source:HGNC Symbol;Acc:HGNC:13931]	-1.39761	3.71608	2.53455e-07	6.00927e-06	Down-regulated
ENSG00000104205	SGK3	serum/glucocorticoid regulated kinase family member 3 [Source:HGNC Symbol;Acc:HGNC:10812]	1.39595	3.66679	2.54153e-07	6.00927e-06	Up-regulated
ENSG00000278995	0	TEC	-2.69278	-0.503495	2.54205e-07	6.00927e-06	Down-regulated
ENSG00000181029	TRAPPC5	trafficking protein particle complex subunit 5 [Source:HGNC Symbol;Acc:HGNC:23067]	-2.76757	1.66505	2.54213e-07	6.00927e-06	Down-regulated
ENSG00000185305	ARL15	ADP ribosylation factor like GTPase 15 [Source:HGNC Symbol;Acc:HGNC:25945]	1.10493	5.4654	2.55534e-07	6.03261e-06	Up-regulated
ENSG00000268996	MAN1B1-DT	MAN1B1 divergent transcript [Source:HGNC Symbol;Acc:HGNC:48715]	-1.13828	3.49623	2.62963e-07	6.16768e-06	Down-regulated
ENSG00000131471	AOC3	amine oxidase copper containing 3 [Source:HGNC Symbol;Acc:HGNC:550]	-1.57826	3.68644	2.63921e-07	6.18213e-06	Down-regulated
ENSG00000261716	H2BC20P	H2B clustered histone 20, pseudogene [Source:HGNC Symbol;Acc:HGNC:20516]	-1.49375	5.47683	2.66732e-07	6.223e-06	Down-regulated
ENSG00000258413	FBXO34-AS1	FBXO34 antisense RNA 1 [Source:HGNC Symbol;Acc:HGNC:55450]	-1.96945	1.15903	2.80768e-07	6.50747e-06	Down-regulated
ENSG00000172954	LCLAT1	lysocardiolipin acyltransferase 1 [Source:HGNC Symbol;Acc:HGNC:26756]	1.07232	4.05772	2.83794e-07	6.55413e-06	Up-regulated
ENSG00000106012	IQCE	IQ motif containing E [Source:HGNC Symbol;Acc:HGNC:29171]	1.02021	4.09795	2.88953e-07	6.60232e-06	Up-regulated
ENSG00000184047	DIABLO	diablo IAP-binding mitochondrial protein [Source:HGNC Symbol;Acc:HGNC:21528]	-1.48908	2.84525	2.89531e-07	6.60232e-06	Down-regulated
ENSG00000228293	0	novel transcript	-3.13833	0.210718	2.92035e-07	6.64251e-06	Down-regulated
ENSG00000186364	NUDT17	nudix hydrolase 17 [Source:HGNC Symbol;Acc:HGNC:26618]	-1.67361	3.22301	3.02798e-07	6.8528e-06	Down-regulated
ENSG00000198964	SGMS1	sphingomyelin synthase 1 [Source:HGNC Symbol;Acc:HGNC:29799]	1.04233	5.59901	3.06734e-07	6.90725e-06	Up-regulated
ENSG00000070495	JMJD6	jumonji domain containing 6, arginine demethylase and lysine hydroxylase [Source:HGNC Symbol;Acc:HGNC:19355]	-1.34279	5.89055	3.10456e-07	6.97368e-06	Down-regulated
ENSG00000272688	0	novel transcript	-1.15079	2.90034	3.24147e-07	7.2362e-06	Down-regulated
ENSG00000143776	CDC42BPA	CDC42 binding protein kinase alpha [Source:HGNC Symbol;Acc:HGNC:1737]	1.04953	6.64967	3.2565e-07	7.26079e-06	Up-regulated
ENSG00000146950	SHROOM2	shroom family member 2 [Source:HGNC Symbol;Acc:HGNC:630]	1.05199	3.58298	3.3023e-07	7.34477e-06	Up-regulated
ENSG00000225357	RPF2P1	ribosome production factor 2 homolog pseudogene 1 [Source:HGNC Symbol;Acc:HGNC:16186]	-3.31748	-0.139298	3.3162e-07	7.36661e-06	Down-regulated
ENSG00000241399	CD302	CD302 molecule [Source:HGNC Symbol;Acc:HGNC:30843]	1.3465	6.0704	3.34639e-07	7.41544e-06	Up-regulated
ENSG00000213433	RPLP1P6	ribosomal protein lateral stalk subunit P1 pseudogene 6 [Source:HGNC Symbol;Acc:HGNC:35809]	-1.33213	3.13541	3.39305e-07	7.48212e-06	Down-regulated
ENSG00000279602	0	TEC	-1.76093	1.5694	3.40787e-07	7.50563e-06	Down-regulated
ENSG00000174365	SNHG11	small nucleolar RNA host gene 11 [Source:HGNC Symbol;Acc:HGNC:25046]	-1.38572	5.71682	3.42578e-07	7.53587e-06	Down-regulated
ENSG00000204217	BMPR2	bone morphogenetic protein receptor type 2 [Source:HGNC Symbol;Acc:HGNC:1078]	1.02159	5.63183	3.44686e-07	7.56378e-06	Up-regulated
ENSG00000110925	CSRNP2	cysteine and serine rich nuclear protein 2 [Source:HGNC Symbol;Acc:HGNC:16006]	-1.2341	6.73029	3.48324e-07	7.62513e-06	Down-regulated
ENSG00000221955	SLC12A8	solute carrier family 12 member 8 [Source:HGNC Symbol;Acc:HGNC:15595]	1.40209	3.11876	3.55416e-07	7.77096e-06	Up-regulated
ENSG00000261556	SMG1P7	SMG1 pseudogene 7 [Source:HGNC Symbol;Acc:HGNC:49864]	-1.50789	2.16388	3.60508e-07	7.8443e-06	Down-regulated
ENSG00000260339	HEXA-AS1	HEXA antisense RNA 1 [Source:HGNC Symbol;Acc:HGNC:25810]	-1.62977	1.70286	3.64699e-07	7.92595e-06	Down-regulated
ENSG00000140262	TCF12	transcription factor 12 [Source:HGNC Symbol;Acc:HGNC:11623]	1.01461	5.48974	3.6533e-07	7.93011e-06	Up-regulated
ENSG00000185022	MAFF	MAF bZIP transcription factor F [Source:HGNC Symbol;Acc:HGNC:6780]	-1.68184	5.28361	3.77218e-07	8.149e-06	Down-regulated
ENSG00000254416	LINC02732	long intergenic non-protein coding RNA 2732 [Source:HGNC Symbol;Acc:HGNC:54249]	1.18298	3.86901	3.78883e-07	8.17519e-06	Up-regulated
ENSG00000169174	PCSK9	proprotein convertase subtilisin/kexin type 9 [Source:HGNC Symbol;Acc:HGNC:20001]	1.10259	4.26339	3.92138e-07	8.42094e-06	Up-regulated
ENSG00000289092	0	novel transcript, antisense to NCOA4	-1.47327	2.22605	3.92656e-07	8.42204e-06	Down-regulated
ENSG00000051382	PIK3CB	phosphatidylinositol-4,5-bisphosphate 3-kinase catalytic subunit beta [Source:HGNC Symbol;Acc:HGNC:8976]	1.13568	6.01599	3.94447e-07	8.44043e-06	Up-regulated
ENSG00000154556	SORBS2	sorbin and SH3 domain containing 2 [Source:HGNC Symbol;Acc:HGNC:24098]	1.77365	4.39082	4.00976e-07	8.55984e-06	Up-regulated
ENSG00000225828	FAM229A	family with sequence similarity 229 member A [Source:HGNC Symbol;Acc:HGNC:44652]	-1.64503	3.39533	4.10094e-07	8.71329e-06	Down-regulated
ENSG00000236383	CCDC200	coiled-coil domain containing 200 [Source:HGNC Symbol;Acc:HGNC:43658]	-2.20596	1.45719	4.21764e-07	8.9195e-06	Down-regulated
ENSG00000164776	PHKG1	phosphorylase kinase catalytic subunit gamma 1 [Source:HGNC Symbol;Acc:HGNC:8930]	-2.02536	1.28393	4.21775e-07	8.9195e-06	Down-regulated
ENSG00000257093	DENND11	DENN domain containing 11 [Source:HGNC Symbol;Acc:HGNC:29472]	1.02022	7.1214	4.26058e-07	8.98971e-06	Up-regulated
ENSG00000248485	PCP4L1	Purkinje cell protein 4 like 1 [Source:HGNC Symbol;Acc:HGNC:20448]	1.05387	4.86143	4.2609e-07	8.98971e-06	Up-regulated
ENSG00000178772	CPN2	carboxypeptidase N subunit 2 [Source:HGNC Symbol;Acc:HGNC:2313]	2.18489	-0.144259	4.28081e-07	9.00734e-06	Up-regulated
ENSG00000170271	FAXDC2	fatty acid hydroxylase domain containing 2 [Source:HGNC Symbol;Acc:HGNC:1334]	1.11531	5.33972	4.31787e-07	9.06754e-06	Up-regulated
ENSG00000111678	C12orf57	chromosome 12 open reading frame 57 [Source:HGNC Symbol;Acc:HGNC:29521]	-1.39474	5.18884	4.38651e-07	9.17077e-06	Down-regulated
ENSG00000183723	CMTM4	CKLF like MARVEL transmembrane domain containing 4 [Source:HGNC Symbol;Acc:HGNC:19175]	1.00731	7.35885	4.38735e-07	9.17077e-06	Up-regulated
ENSG00000085552	IGSF9	immunoglobulin superfamily member 9 [Source:HGNC Symbol;Acc:HGNC:18132]	1.11724	5.49508	4.42081e-07	9.21937e-06	Up-regulated
ENSG00000275713	H2BC9	H2B clustered histone 9 [Source:HGNC Symbol;Acc:HGNC:4755]	-2.20799	1.00672	4.4456e-07	9.26038e-06	Down-regulated
ENSG00000131652	THOC6	THO complex 6 [Source:HGNC Symbol;Acc:HGNC:28369]	-1.72345	4.64785	4.4674e-07	9.27703e-06	Down-regulated
ENSG00000198121	LPAR1	lysophosphatidic acid receptor 1 [Source:HGNC Symbol;Acc:HGNC:3166]	1.31222	3.68447	4.53566e-07	9.37335e-06	Up-regulated
ENSG00000198910	L1CAM	L1 cell adhesion molecule [Source:HGNC Symbol;Acc:HGNC:6470]	-1.06542	2.9543	4.54654e-07	9.37335e-06	Down-regulated
ENSG00000165675	ENOX2	ecto-NOX disulfide-thiol exchanger 2 [Source:HGNC Symbol;Acc:HGNC:2259]	1.28949	3.12516	4.62912e-07	9.52721e-06	Up-regulated
ENSG00000243955	GSTA1	glutathione S-transferase alpha 1 [Source:HGNC Symbol;Acc:HGNC:4626]	1.74131	8.56396	4.68373e-07	9.59049e-06	Up-regulated
ENSG00000113108	APBB3	amyloid beta precursor protein binding family B member 3 [Source:HGNC Symbol;Acc:HGNC:20708]	-1.32233	4.05162	4.74645e-07	9.68597e-06	Down-regulated
ENSG00000132915	PDE6A	phosphodiesterase 6A [Source:HGNC Symbol;Acc:HGNC:8785]	1.15238	2.69185	4.77728e-07	9.72691e-06	Up-regulated
ENSG00000141499	WRAP53	WD repeat containing antisense to TP53 [Source:HGNC Symbol;Acc:HGNC:25522]	-1.08723	2.88556	4.91995e-07	9.95009e-06	Down-regulated
ENSG00000198682	PAPSS2	3'-phosphoadenosine 5'-phosphosulfate synthase 2 [Source:HGNC Symbol;Acc:HGNC:8604]	1.15695	6.10627	4.95139e-07	9.9913e-06	Up-regulated
ENSG00000140396	NCOA2	nuclear receptor coactivator 2 [Source:HGNC Symbol;Acc:HGNC:7669]	1.1733	5.28197	4.99666e-07	1.00657e-05	Up-regulated
ENSG00000148488	ST8SIA6	ST8 alpha-N-acetyl-neuraminide alpha-2,8-sialyltransferase 6 [Source:HGNC Symbol;Acc:HGNC:23317]	1.14783	4.37105	4.9994e-07	1.00657e-05	Up-regulated
ENSG00000185973	TMLHE	trimethyllysine hydroxylase, epsilon [Source:HGNC Symbol;Acc:HGNC:18308]	1.04622	3.26976	5.03746e-07	1.01197e-05	Up-regulated
ENSG00000188611	ASAH2	N-acylsphingosine amidohydrolase 2 [Source:HGNC Symbol;Acc:HGNC:18860]	1.76159	4.20822	5.2109e-07	1.04103e-05	Up-regulated
ENSG00000272994	C2orf49-DT	C2orf49 divergent transcript [Source:HGNC Symbol;Acc:HGNC:55178]	-1.39566	3.75758	5.42389e-07	1.07971e-05	Down-regulated
ENSG00000189410	SH2D5	SH2 domain containing 5 [Source:HGNC Symbol;Acc:HGNC:28819]	-1.55463	0.738555	5.42845e-07	1.07971e-05	Down-regulated
ENSG00000119508	NR4A3	nuclear receptor subfamily 4 group A member 3 [Source:HGNC Symbol;Acc:HGNC:7982]	-2.45277	-0.289795	5.54151e-07	1.09616e-05	Down-regulated
ENSG00000287534	0	novel transcript, sense intronic to RP11-231C18.3	-2.74805	0.102912	5.60846e-07	1.10819e-05	Down-regulated
ENSG00000260563	0	novel transcript	-1.29777	4.35064	5.64724e-07	1.11342e-05	Down-regulated
ENSG00000020426	MNAT1	MNAT1 component of CDK activating kinase [Source:HGNC Symbol;Acc:HGNC:7181]	1.02395	3.68109	5.79698e-07	1.13797e-05	Up-regulated
ENSG00000196449	YRDC	yrdC N6-threonylcarbamoyltransferase domain containing [Source:HGNC Symbol;Acc:HGNC:28905]	-1.06792	4.37623	6.01984e-07	1.17027e-05	Down-regulated
ENSG00000168903	BTNL3	butyrophilin like 3 [Source:HGNC Symbol;Acc:HGNC:1143]	1.29196	5.51304	6.10623e-07	1.18325e-05	Up-regulated
ENSG00000178171	AMER3	APC membrane recruitment protein 3 [Source:HGNC Symbol;Acc:HGNC:26771]	2.08516	1.69596	6.1359e-07	1.18724e-05	Up-regulated
ENSG00000112685	EXOC2	exocyst complex component 2 [Source:HGNC Symbol;Acc:HGNC:24968]	1.00271	4.46512	6.25085e-07	1.20352e-05	Up-regulated
ENSG00000176809	LRRC37A3	leucine rich repeat containing 37 member A3 [Source:HGNC Symbol;Acc:HGNC:32427]	-2.3739	-0.279546	6.29223e-07	1.2084e-05	Down-regulated
ENSG00000226979	LTA	lymphotoxin alpha [Source:HGNC Symbol;Acc:HGNC:6709]	-2.59279	-0.517656	6.31283e-07	1.20901e-05	Down-regulated
ENSG00000141447	OSBPL1A	oxysterol binding protein like 1A [Source:HGNC Symbol;Acc:HGNC:16398]	1.05228	5.0088	6.34736e-07	1.21418e-05	Up-regulated
ENSG00000125255	SLC10A2	solute carrier family 10 member 2 [Source:HGNC Symbol;Acc:HGNC:10906]	1.49986	6.09444	6.46375e-07	1.23399e-05	Up-regulated
ENSG00000280138	0	novel transcript	-2.14345	1.64915	6.53137e-07	1.24034e-05	Down-regulated
ENSG00000153246	PLA2R1	phospholipase A2 receptor 1 [Source:HGNC Symbol;Acc:HGNC:9042]	1.02452	3.28272	6.56385e-07	1.2452e-05	Up-regulated
ENSG00000151422	FER	FER tyrosine kinase [Source:HGNC Symbol;Acc:HGNC:3655]	1.23216	4.2591	6.62813e-07	1.2522e-05	Up-regulated
ENSG00000288827	0	novel transcript, sense intronic to DHX34	-1.44445	2.08003	6.62845e-07	1.2522e-05	Down-regulated
ENSG00000165730	STOX1	storkhead box 1 [Source:HGNC Symbol;Acc:HGNC:23508]	1.14184	3.08513	6.72154e-07	1.26713e-05	Up-regulated
ENSG00000169570	DTWD2	DTW domain containing 2 [Source:HGNC Symbol;Acc:HGNC:19334]	2.0315	2.2806	6.75899e-07	1.26866e-05	Up-regulated
ENSG00000124216	SNAI1	snail family transcriptional repressor 1 [Source:HGNC Symbol;Acc:HGNC:11128]	-1.85668	4.25758	6.75972e-07	1.26866e-05	Down-regulated
ENSG00000203739	PRDX6-AS1	PRDX6 antisense RNA 1 [Source:HGNC Symbol;Acc:HGNC:54870]	1.41702	3.6013	6.77254e-07	1.2688e-05	Up-regulated
ENSG00000164076	CAMKV	CaM kinase like vesicle associated [Source:HGNC Symbol;Acc:HGNC:28788]	1.16189	3.88761	6.87828e-07	1.28594e-05	Up-regulated
ENSG00000180953	ST20	suppressor of tumorigenicity 20 [Source:HGNC Symbol;Acc:HGNC:33520]	-1.75769	1.1424	6.89621e-07	1.28611e-05	Down-regulated
ENSG00000215120	SOCS6P1	SOCS6 pseudogene 1 [Source:HGNC Symbol;Acc:HGNC:54990]	-3.82755	-1.1313	6.97314e-07	1.29696e-05	Down-regulated
ENSG00000069018	TRPC7	transient receptor potential cation channel subfamily C member 7 [Source:HGNC Symbol;Acc:HGNC:20754]	2.03037	0.96899	6.99518e-07	1.29717e-05	Up-regulated
ENSG00000143107	FNDC7	fibronectin type III domain containing 7 [Source:HGNC Symbol;Acc:HGNC:26668]	-2.65787	-0.702713	7.00649e-07	1.29782e-05	Down-regulated
ENSG00000219200	RNASEK	ribonuclease K [Source:HGNC Symbol;Acc:HGNC:33911]	-1.54138	2.18371	7.12141e-07	1.3164e-05	Down-regulated
ENSG00000109654	TRIM2	tripartite motif containing 2 [Source:HGNC Symbol;Acc:HGNC:15974]	1.16277	5.48005	7.21843e-07	1.33025e-05	Up-regulated
ENSG00000169155	ZBTB43	zinc finger and BTB domain containing 43 [Source:HGNC Symbol;Acc:HGNC:17908]	-1.23255	5.57595	7.27175e-07	1.33857e-05	Down-regulated
ENSG00000166165	CKB	creatine kinase B [Source:HGNC Symbol;Acc:HGNC:1991]	1.11503	8.94302	7.37206e-07	1.35304e-05	Up-regulated
ENSG00000111452	ADGRD1	adhesion G protein-coupled receptor D1 [Source:HGNC Symbol;Acc:HGNC:19893]	1.53129	4.95695	7.41122e-07	1.35683e-05	Up-regulated
ENSG00000119725	ZNF410	zinc finger protein 410 [Source:HGNC Symbol;Acc:HGNC:20144]	-1.87394	0.816421	7.49452e-07	1.36995e-05	Down-regulated
ENSG00000272899	ATP6V1FNB	ATP6V1F neighbor [Source:HGNC Symbol;Acc:HGNC:52392]	-2.41581	1.30164	7.53857e-07	1.37661e-05	Down-regulated
ENSG00000139508	SLC46A3	solute carrier family 46 member 3 [Source:HGNC Symbol;Acc:HGNC:27501]	1.19517	6.14057	7.63077e-07	1.39063e-05	Up-regulated
ENSG00000172296	SPTLC3	serine palmitoyltransferase long chain base subunit 3 [Source:HGNC Symbol;Acc:HGNC:16253]	1.62887	6.55153	7.72249e-07	1.40112e-05	Up-regulated
ENSG00000204396	VWA7	von Willebrand factor A domain containing 7 [Source:HGNC Symbol;Acc:HGNC:13939]	-1.08782	3.70358	7.7271e-07	1.40112e-05	Down-regulated
ENSG00000255717	SNHG1	small nucleolar RNA host gene 1 [Source:HGNC Symbol;Acc:HGNC:32688]	-1.43144	7.37024	7.77846e-07	1.40902e-05	Down-regulated
ENSG00000170293	CMTM8	CKLF like MARVEL transmembrane domain containing 8 [Source:HGNC Symbol;Acc:HGNC:19179]	1.3671	2.96968	7.81111e-07	1.41351e-05	Up-regulated
ENSG00000272145	NFYC-AS1	NFYC antisense RNA 1 [Source:HGNC Symbol;Acc:HGNC:49451]	-1.99551	1.04908	7.86977e-07	1.41986e-05	Down-regulated
ENSG00000213903	LTB4R	leukotriene B4 receptor [Source:HGNC Symbol;Acc:HGNC:6713]	-1.21436	5.39228	7.89711e-07	1.42337e-05	Down-regulated
ENSG00000203875	SNHG5	small nucleolar RNA host gene 5 [Source:HGNC Symbol;Acc:HGNC:21026]	-1.35716	3.79097	7.92593e-07	1.42572e-05	Down-regulated
ENSG00000155158	TTC39B	tetratricopeptide repeat domain 39B [Source:HGNC Symbol;Acc:HGNC:23704]	1.04797	5.28659	7.96342e-07	1.4282e-05	Up-regulated
ENSG00000153233	PTPRR	protein tyrosine phosphatase receptor type R [Source:HGNC Symbol;Acc:HGNC:9680]	1.03415	5.25023	8.17882e-07	1.45958e-05	Up-regulated
ENSG00000115756	HPCAL1	hippocalcin like 1 [Source:HGNC Symbol;Acc:HGNC:5145]	1.139	3.51503	8.2157e-07	1.46283e-05	Up-regulated
ENSG00000103316	CRYM	crystallin mu [Source:HGNC Symbol;Acc:HGNC:2418]	1.09121	2.18421	8.2877e-07	1.47319e-05	Up-regulated
ENSG00000243176	0	novel transcript	-1.46327	1.27424	8.38286e-07	1.48739e-05	Down-regulated
ENSG00000180806	HOXC9	homeobox C9 [Source:HGNC Symbol;Acc:HGNC:5130]	-1.62176	1.92955	8.40509e-07	1.48966e-05	Down-regulated
ENSG00000065534	MYLK	myosin light chain kinase [Source:HGNC Symbol;Acc:HGNC:7590]	1.02143	5.65865	8.41898e-07	1.49065e-05	Up-regulated
ENSG00000237070	0	novel transcript, antisense to MEOX2	1.22422	4.42502	8.52135e-07	1.50289e-05	Up-regulated
ENSG00000136040	PLXNC1	plexin C1 [Source:HGNC Symbol;Acc:HGNC:9106]	2.09009	3.9936	8.57158e-07	1.5088e-05	Up-regulated
ENSG00000162783	IER5	immediate early response 5 [Source:HGNC Symbol;Acc:HGNC:5393]	-1.22928	4.38279	8.60698e-07	1.51356e-05	Down-regulated
ENSG00000256195	0	novel transcript	-2.61301	0.430327	8.92306e-07	1.56154e-05	Down-regulated
ENSG00000215014	0	novel transcript	-1.83138	1.76395	8.95541e-07	1.56568e-05	Down-regulated
ENSG00000167972	ABCA3	ATP binding cassette subfamily A member 3 [Source:HGNC Symbol;Acc:HGNC:33]	1.04384	3.94751	9.15311e-07	1.591e-05	Up-regulated
ENSG00000105662	CRTC1	CREB regulated transcription coactivator 1 [Source:HGNC Symbol;Acc:HGNC:16062]	1.55937	3.13109	9.29999e-07	1.61033e-05	Up-regulated
ENSG00000260942	CAPN10-DT	CAPN10 divergent transcript [Source:HGNC Symbol;Acc:HGNC:48839]	-1.4194	2.32054	9.32509e-07	1.61313e-05	Down-regulated
ENSG00000137331	IER3	immediate early response 3 [Source:HGNC Symbol;Acc:HGNC:5392]	-1.82386	4.31297	9.37949e-07	1.62099e-05	Down-regulated
ENSG00000170873	MTSS1	MTSS I-BAR domain containing 1 [Source:HGNC Symbol;Acc:HGNC:20443]	1.17268	3.84904	9.58525e-07	1.64866e-05	Up-regulated
ENSG00000135919	SERPINE2	serpin family E member 2 [Source:HGNC Symbol;Acc:HGNC:8951]	-1.5517	3.46235	9.78094e-07	1.67543e-05	Down-regulated
ENSG00000288996	0	novel transcript	-2.34471	0.256286	9.78724e-07	1.67543e-05	Down-regulated
ENSG00000274292	0	novel transcript	-2.0437	0.835088	9.81975e-07	1.67781e-05	Down-regulated
ENSG00000047579	DTNBP1	dystrobrevin binding protein 1 [Source:HGNC Symbol;Acc:HGNC:17328]	1.10648	3.69101	9.86991e-07	1.6832e-05	Up-regulated
ENSG00000103187	COTL1	coactosin like F-actin binding protein 1 [Source:HGNC Symbol;Acc:HGNC:18304]	-1.15677	3.75393	9.89521e-07	1.68328e-05	Down-regulated
ENSG00000115844	DLX2	distal-less homeobox 2 [Source:HGNC Symbol;Acc:HGNC:2915]	-2.02809	0.593028	9.99672e-07	1.69841e-05	Down-regulated
ENSG00000159733	ZFYVE28	zinc finger FYVE-type containing 28 [Source:HGNC Symbol;Acc:HGNC:29334]	1.89006	2.29236	1.00197e-06	1.70071e-05	Up-regulated
ENSG00000184786	DYNLT2	dynein light chain Tctex-type 2 [Source:HGNC Symbol;Acc:HGNC:11695]	-1.74789	3.82469	1.00907e-06	1.70968e-05	Down-regulated
ENSG00000107249	GLIS3	GLIS family zinc finger 3 [Source:HGNC Symbol;Acc:HGNC:28510]	1.24745	3.49296	1.01897e-06	1.7247e-05	Up-regulated
ENSG00000189120	SP6	Sp6 transcription factor [Source:HGNC Symbol;Acc:HGNC:14530]	-1.13936	7.14257	1.04257e-06	1.75643e-05	Down-regulated
ENSG00000281376	ABALON	apoptotic BCL2L1-antisense long non-coding RNA [Source:HGNC Symbol;Acc:HGNC:49667]	-2.66242	-1.12593	1.07145e-06	1.79337e-05	Down-regulated
ENSG00000245498	0	novel transcript, antisense to C11orf61	-1.05976	5.02686	1.09184e-06	1.81906e-05	Down-regulated
ENSG00000152433	ZNF547	zinc finger protein 547 [Source:HGNC Symbol;Acc:HGNC:26432]	-1.90956	1.55645	1.09945e-06	1.82836e-05	Down-regulated
ENSG00000102096	PIM2	Pim-2 proto-oncogene, serine/threonine kinase [Source:HGNC Symbol;Acc:HGNC:8987]	-1.37877	4.45242	1.11065e-06	1.8419e-05	Down-regulated
ENSG00000272630	0	novel transcript	-2.04977	1.61046	1.15293e-06	1.89981e-05	Down-regulated
ENSG00000139865	TTC6	tetratricopeptide repeat domain 6 [Source:HGNC Symbol;Acc:HGNC:19739]	1.35337	3.20322	1.15909e-06	1.90823e-05	Up-regulated
ENSG00000113269	RNF130	ring finger protein 130 [Source:HGNC Symbol;Acc:HGNC:18280]	1.20252	4.64562	1.16026e-06	1.9084e-05	Up-regulated
ENSG00000227896	0	novel transcript	-1.81518	1.50032	1.19325e-06	1.95377e-05	Down-regulated
ENSG00000171786	NHLH1	nescient helix-loop-helix 1 [Source:HGNC Symbol;Acc:HGNC:7817]	-2.31454	1.49496	1.20698e-06	1.97267e-05	Down-regulated
ENSG00000111701	APOBEC1	apolipoprotein B mRNA editing enzyme catalytic subunit 1 [Source:HGNC Symbol;Acc:HGNC:604]	1.0442	4.1405	1.22031e-06	1.98585e-05	Up-regulated
ENSG00000136881	BAAT	bile acid-CoA:amino acid N-acyltransferase [Source:HGNC Symbol;Acc:HGNC:932]	-1.13541	2.60203	1.23348e-06	2.00329e-05	Down-regulated
ENSG00000161653	NAGS	N-acetylglutamate synthase [Source:HGNC Symbol;Acc:HGNC:17996]	1.18721	4.38267	1.2348e-06	2.00364e-05	Up-regulated
ENSG00000263826	0	novel transcript, antisense to eukaryotic translation initiation factor 4A, isoform 2 EIF4A2	-1.95437	2.00286	1.24295e-06	2.01119e-05	Down-regulated
ENSG00000227908	FLJ31104	uncharacterized LOC441072 [Source:NCBI gene (formerly Entrezgene);Acc:441072]	-1.73812	2.44626	1.2449e-06	2.01119e-05	Down-regulated
ENSG00000254473	UBQLN1-AS1	UBQLN1 antisense RNA 1 [Source:HGNC Symbol;Acc:HGNC:55518]	-1.44785	1.23802	1.24502e-06	2.01119e-05	Down-regulated
ENSG00000176678	FOXL1	forkhead box L1 [Source:HGNC Symbol;Acc:HGNC:3817]	-2.26696	-0.373843	1.26816e-06	2.0449e-05	Down-regulated
ENSG00000289554	0	novel transcript, sense intronic to GPN2	-1.809	1.31918	1.28056e-06	2.05939e-05	Down-regulated
ENSG00000158019	BABAM2	BRISC and BRCA1 A complex member 2 [Source:HGNC Symbol;Acc:HGNC:1106]	1.05597	4.66934	1.2932e-06	2.07786e-05	Up-regulated
ENSG00000138336	TET1	tet methylcytosine dioxygenase 1 [Source:HGNC Symbol;Acc:HGNC:29484]	1.34714	4.19885	1.31259e-06	2.10714e-05	Up-regulated
ENSG00000166851	PLK1	polo like kinase 1 [Source:HGNC Symbol;Acc:HGNC:9077]	-1.19747	3.75689	1.32135e-06	2.11933e-05	Down-regulated
ENSG00000155629	PIK3AP1	phosphoinositide-3-kinase adaptor protein 1 [Source:HGNC Symbol;Acc:HGNC:30034]	1.1261	2.85415	1.32618e-06	2.12437e-05	Up-regulated
ENSG00000001626	CFTR	CF transmembrane conductance regulator [Source:HGNC Symbol;Acc:HGNC:1884]	1.19391	5.41449	1.33191e-06	2.12869e-05	Up-regulated
ENSG00000283078	0	novel transcript	-1.38689	2.37313	1.3383e-06	2.13572e-05	Down-regulated
ENSG00000172602	RND1	Rho family GTPase 1 [Source:HGNC Symbol;Acc:HGNC:18314]	-1.63198	2.29603	1.34501e-06	2.14205e-05	Down-regulated
ENSG00000274925	ZKSCAN2-DT	ZKSCAN2 divergent transcript [Source:HGNC Symbol;Acc:HGNC:53912]	-1.13563	3.00323	1.36279e-06	2.16654e-05	Down-regulated
ENSG00000119121	TRPM6	transient receptor potential cation channel subfamily M member 6 [Source:HGNC Symbol;Acc:HGNC:17995]	1.12662	4.14356	1.3723e-06	2.17975e-05	Up-regulated
ENSG00000242125	SNHG3	small nucleolar RNA host gene 3 [Source:HGNC Symbol;Acc:HGNC:10118]	-1.27258	4.05068	1.37655e-06	2.18458e-05	Down-regulated
ENSG00000109063	MYH3	myosin heavy chain 3 [Source:HGNC Symbol;Acc:HGNC:7573]	-1.03093	2.3556	1.37779e-06	2.18463e-05	Down-regulated
ENSG00000073849	ST6GAL1	ST6 beta-galactoside alpha-2,6-sialyltransferase 1 [Source:HGNC Symbol;Acc:HGNC:10860]	1.53834	7.47956	1.37909e-06	2.18476e-05	Up-regulated
ENSG00000140471	LINS1	lines homolog 1 [Source:HGNC Symbol;Acc:HGNC:30922]	-1.18466	4.53659	1.3911e-06	2.19801e-05	Down-regulated
ENSG00000257743	MGAM2	maltase-glucoamylase 2 (putative) [Source:HGNC Symbol;Acc:HGNC:28101]	1.04647	6.80178	1.39233e-06	2.19803e-05	Up-regulated
ENSG00000229320	KRT8P12	keratin 8 pseudogene 12 [Source:HGNC Symbol;Acc:HGNC:28057]	-1.18644	3.30059	1.39494e-06	2.20023e-05	Down-regulated
ENSG00000196923	PDLIM7	PDZ and LIM domain 7 [Source:HGNC Symbol;Acc:HGNC:22958]	-1.62112	3.16255	1.40474e-06	2.20989e-05	Down-regulated
ENSG00000285589	0	novel transcript	-1.67946	3.39805	1.4213e-06	2.234e-05	Down-regulated
ENSG00000109193	SULT1E1	sulfotransferase family 1E member 1 [Source:HGNC Symbol;Acc:HGNC:11377]	1.76288	3.24995	1.4397e-06	2.26096e-05	Up-regulated
ENSG00000214021	TTLL3	tubulin tyrosine ligase like 3 [Source:HGNC Symbol;Acc:HGNC:24483]	-1.05955	5.13668	1.44601e-06	2.26889e-05	Down-regulated
ENSG00000062282	DGAT2	diacylglycerol O-acyltransferase 2 [Source:HGNC Symbol;Acc:HGNC:16940]	1.26367	5.80615	1.4547e-06	2.27461e-05	Up-regulated
ENSG00000261526	0	novel transcript	-1.49543	1.77664	1.48863e-06	2.3077e-05	Down-regulated
ENSG00000249395	CASC9	cancer susceptibility 9 [Source:HGNC Symbol;Acc:HGNC:48906]	1.33614	3.17655	1.50603e-06	2.32867e-05	Up-regulated
ENSG00000279649	0	novel transcript	-2.3396	-0.370349	1.57489e-06	2.41447e-05	Down-regulated
ENSG00000142871	CCN1	cellular communication network factor 1 [Source:HGNC Symbol;Acc:HGNC:2654]	-1.34111	4.73754	1.60029e-06	2.44718e-05	Down-regulated
ENSG00000279048	0	tec	-1.7672	2.69228	1.60364e-06	2.45024e-05	Down-regulated
ENSG00000238755	LINC02006	long intergenic non-protein coding RNA 2006 [Source:HGNC Symbol;Acc:HGNC:52842]	2.35608	1.64493	1.63961e-06	2.49464e-05	Up-regulated
ENSG00000287110	0	novel transcript	-1.7266	1.05905	1.64539e-06	2.49921e-05	Down-regulated
ENSG00000228393	LINC01004	long intergenic non-protein coding RNA 1004 [Source:HGNC Symbol;Acc:HGNC:48961]	-1.32417	3.32339	1.70933e-06	2.57852e-05	Down-regulated
ENSG00000107130	NCS1	neuronal calcium sensor 1 [Source:HGNC Symbol;Acc:HGNC:3953]	1.04407	2.13829	1.71342e-06	2.58085e-05	Up-regulated
ENSG00000169914	OTUD3	OTU deubiquitinase 3 [Source:HGNC Symbol;Acc:HGNC:29038]	-1.0255	4.83869	1.72675e-06	2.59013e-05	Down-regulated
ENSG00000117115	PADI2	peptidyl arginine deiminase 2 [Source:HGNC Symbol;Acc:HGNC:18341]	1.09282	4.21706	1.7517e-06	2.61605e-05	Up-regulated
ENSG00000153029	MR1	major histocompatibility complex, class I-related [Source:HGNC Symbol;Acc:HGNC:4975]	1.14191	4.5537	1.75467e-06	2.6168e-05	Up-regulated
ENSG00000111846	GCNT2	glucosaminyl (N-acetyl) transferase 2 (I blood group) [Source:HGNC Symbol;Acc:HGNC:4204]	1.0502	5.81834	1.84491e-06	2.73107e-05	Up-regulated
ENSG00000288663	0	novel protein, readthrough PFDN5-C12orf10	-1.37743	1.61207	1.85539e-06	2.74209e-05	Down-regulated
ENSG00000124659	TBCC	tubulin folding cofactor C [Source:HGNC Symbol;Acc:HGNC:11580]	-1.04736	4.68091	1.85784e-06	2.74229e-05	Down-regulated
ENSG00000186088	GSAP	gamma-secretase activating protein [Source:HGNC Symbol;Acc:HGNC:28042]	1.05504	3.79356	1.87423e-06	2.75713e-05	Up-regulated
ENSG00000256667	KLRA1P	killer cell lectin like receptor A1, pseudogene [Source:HGNC Symbol;Acc:HGNC:6372]	-1.07058	3.03873	1.87615e-06	2.75713e-05	Down-regulated
ENSG00000246308	0	novel transcript, antisense to ZBED5	-2.55457	-0.348549	1.90602e-06	2.78613e-05	Down-regulated
ENSG00000184434	LRRC19	leucine rich repeat containing 19 [Source:HGNC Symbol;Acc:HGNC:23379]	1.04585	5.0611	1.91119e-06	2.78932e-05	Up-regulated
ENSG00000214102	WEE2	WEE2 oocyte meiosis inhibiting kinase [Source:HGNC Symbol;Acc:HGNC:19684]	1.9602	2.52696	1.91248e-06	2.78932e-05	Up-regulated
ENSG00000113946	CLDN16	claudin 16 [Source:HGNC Symbol;Acc:HGNC:2037]	1.53148	1.88286	1.93815e-06	2.816e-05	Up-regulated
ENSG00000276966	H4C5	H4 clustered histone 5 [Source:HGNC Symbol;Acc:HGNC:4790]	-2.28597	0.455344	1.95116e-06	2.82808e-05	Down-regulated
ENSG00000198814	GK	glycerol kinase [Source:HGNC Symbol;Acc:HGNC:4289]	1.0437	5.26555	1.97177e-06	2.85073e-05	Up-regulated
ENSG00000231826	LINC01819	long intergenic non-protein coding RNA 1819 [Source:HGNC Symbol;Acc:HGNC:52624]	-1.40575	2.50837	1.97626e-06	2.85073e-05	Down-regulated
ENSG00000207357	RNU6-2	RNA, U6 small nuclear 2 [Source:HGNC Symbol;Acc:HGNC:34270]	-2.89166	-0.257935	2.02979e-06	2.92562e-05	Down-regulated
ENSG00000145681	HAPLN1	hyaluronan and proteoglycan link protein 1 [Source:HGNC Symbol;Acc:HGNC:2380]	-1.62727	2.63774	2.10162e-06	3.01952e-05	Down-regulated
ENSG00000232656	IDI2-AS1	IDI2 antisense RNA 1 [Source:HGNC Symbol;Acc:HGNC:30885]	-1.98523	0.777601	2.10639e-06	3.02156e-05	Down-regulated
ENSG00000107186	MPDZ	multiple PDZ domain crumbs cell polarity complex component [Source:HGNC Symbol;Acc:HGNC:7208]	1.60618	1.89677	2.11879e-06	3.03452e-05	Up-regulated
ENSG00000149016	TUT1	terminal uridylyl transferase 1, U6 snRNA-specific [Source:HGNC Symbol;Acc:HGNC:26184]	-1.02671	4.32496	2.14489e-06	3.06947e-05	Down-regulated
ENSG00000269821	KCNQ1OT1	KCNQ1 opposite strand/antisense transcript 1 [Source:HGNC Symbol;Acc:HGNC:6295]	-1.27659	5.01306	2.16785e-06	3.09252e-05	Down-regulated
ENSG00000135638	EMX1	empty spiracles homeobox 1 [Source:HGNC Symbol;Acc:HGNC:3340]	1.12106	3.33366	2.1756e-06	3.09915e-05	Up-regulated
ENSG00000177706	FAM20C	FAM20C golgi associated secretory pathway kinase [Source:HGNC Symbol;Acc:HGNC:22140]	1.32097	4.44936	2.17788e-06	3.09915e-05	Up-regulated
ENSG00000258682	0	novel transcript, sense overlapping PSMA3	-1.9624	0.935473	2.18107e-06	3.09915e-05	Down-regulated
ENSG00000289154	0	novel transcript, sense intronic to CBX5	-2.05252	1.66739	2.20868e-06	3.12853e-05	Down-regulated
ENSG00000229656	ITGB1-DT	ITGB1 divergent transcript [Source:HGNC Symbol;Acc:HGNC:53718]	-2.32684	-0.123725	2.21653e-06	3.13714e-05	Down-regulated
ENSG00000275479	0	novel transcript	-2.03659	-0.0881253	2.24979e-06	3.16196e-05	Down-regulated
ENSG00000151376	ME3	malic enzyme 3 [Source:HGNC Symbol;Acc:HGNC:6985]	-1.02033	3.4742	2.25436e-06	3.16347e-05	Down-regulated
ENSG00000105388	CEACAM5	CEA cell adhesion molecule 5 [Source:HGNC Symbol;Acc:HGNC:1817]	-1.00802	6.41127	2.27495e-06	3.18493e-05	Down-regulated
ENSG00000204237	OXLD1	oxidoreductase like domain containing 1 [Source:HGNC Symbol;Acc:HGNC:27901]	-1.34769	3.922	2.31521e-06	3.23128e-05	Down-regulated
ENSG00000288530	0	novel transcript, antisense to LGR5	-3.23014	-0.820504	2.3196e-06	3.2349e-05	Down-regulated
ENSG00000233217	MROH3P	maestro heat like repeat family member 3, pseudogene [Source:HGNC Symbol;Acc:HGNC:33122]	-1.79318	1.74582	2.39426e-06	3.32874e-05	Down-regulated
ENSG00000239779	WBP1	WW domain binding protein 1 [Source:HGNC Symbol;Acc:HGNC:12737]	-1.29326	4.0693	2.40613e-06	3.33497e-05	Down-regulated
ENSG00000126106	TMEM53	transmembrane protein 53 [Source:HGNC Symbol;Acc:HGNC:26186]	1.12803	2.65515	2.40966e-06	3.33681e-05	Up-regulated
ENSG00000289015	0	novel transcript	-1.87434	0.246484	2.42005e-06	3.344e-05	Down-regulated
ENSG00000213694	S1PR3	sphingosine-1-phosphate receptor 3 [Source:HGNC Symbol;Acc:HGNC:3167]	-1.83235	-0.0216426	2.42473e-06	3.34534e-05	Down-regulated
ENSG00000240731	0	novel transcript	-1.54579	1.33206	2.42701e-06	3.34595e-05	Down-regulated
ENSG00000261189	0	novel transcript, antisense to DSP	-1.09586	2.91006	2.44374e-06	3.36387e-05	Down-regulated
ENSG00000121577	POPDC2	popeye domain containing 2 [Source:HGNC Symbol;Acc:HGNC:17648]	-1.88339	0.215347	2.49981e-06	3.43059e-05	Down-regulated
ENSG00000103044	HAS3	hyaluronan synthase 3 [Source:HGNC Symbol;Acc:HGNC:4820]	-1.42179	2.7802	2.50638e-06	3.43178e-05	Down-regulated
ENSG00000187867	PALM3	paralemmin 3 [Source:HGNC Symbol;Acc:HGNC:33274]	1.11839	3.93869	2.52194e-06	3.45047e-05	Up-regulated
ENSG00000285715	0	novel transcript, antisense to TACC2	1.08508	3.66267	2.57532e-06	3.51551e-05	Up-regulated
ENSG00000275902	0	novel transcript, antisense to HGS	-1.90691	1.09842	2.60914e-06	3.55362e-05	Down-regulated
ENSG00000136717	BIN1	bridging integrator 1 [Source:HGNC Symbol;Acc:HGNC:1052]	1.27762	4.72615	2.61712e-06	3.56181e-05	Up-regulated
ENSG00000143344	RGL1	ral guanine nucleotide dissociation stimulator like 1 [Source:HGNC Symbol;Acc:HGNC:30281]	1.13244	5.23499	2.64649e-06	3.59635e-05	Up-regulated
ENSG00000166897	ELFN2	extracellular leucine rich repeat and fibronectin type III domain containing 2 [Source:HGNC Symbol;Acc:HGNC:29396]	1.73188	1.62496	2.70939e-06	3.67275e-05	Up-regulated
ENSG00000254505	CHMP4A	charged multivesicular body protein 4A [Source:HGNC Symbol;Acc:HGNC:20274]	-1.30074	2.02069	2.71755e-06	3.67683e-05	Down-regulated
ENSG00000261159	0	novel transcript	-1.50385	0.699647	2.71792e-06	3.67683e-05	Down-regulated
ENSG00000272030	0	novel transcript, antisense to S100A1 and CHTOP	-1.90219	1.56031	2.73579e-06	3.6927e-05	Down-regulated
ENSG00000188959	C9orf152	chromosome 9 open reading frame 152 [Source:HGNC Symbol;Acc:HGNC:31455]	-2.20737	-0.0125576	2.74458e-06	3.7018e-05	Down-regulated
ENSG00000152217	SETBP1	SET binding protein 1 [Source:HGNC Symbol;Acc:HGNC:15573]	1.79643	3.75043	2.77269e-06	3.72858e-05	Up-regulated
ENSG00000069869	NEDD4	NEDD4 E3 ubiquitin protein ligase [Source:HGNC Symbol;Acc:HGNC:7727]	1.0189	6.93404	2.79305e-06	3.75037e-05	Up-regulated
ENSG00000153234	NR4A2	nuclear receptor subfamily 4 group A member 2 [Source:HGNC Symbol;Acc:HGNC:7981]	-1.62807	2.77614	2.83053e-06	3.79224e-05	Down-regulated
ENSG00000108950	FAM20A	FAM20A golgi associated secretory pathway pseudokinase [Source:HGNC Symbol;Acc:HGNC:23015]	1.2806	2.99005	2.86623e-06	3.8287e-05	Up-regulated
ENSG00000288007	0	novel transcript	-2.04265	0.293656	2.90356e-06	3.86713e-05	Down-regulated
ENSG00000143570	SLC39A1	solute carrier family 39 member 1 [Source:HGNC Symbol;Acc:HGNC:12876]	-1.65884	1.16073	2.906e-06	3.86752e-05	Down-regulated
ENSG00000199488	RNU1-70P	RNA, U1 small nuclear 70, pseudogene [Source:HGNC Symbol;Acc:HGNC:48412]	2.2765	0.541544	2.94607e-06	3.9082e-05	Up-regulated
ENSG00000254248	0	novel transcript, antisense to NDUFAF6	1.90533	0.393071	2.94955e-06	3.9082e-05	Up-regulated
ENSG00000112893	MAN2A1	mannosidase alpha class 2A member 1 [Source:HGNC Symbol;Acc:HGNC:6824]	1.04751	7.66017	2.97724e-06	3.93335e-05	Up-regulated
ENSG00000266921	ZNF230-DT	ZNF230 divergent transcript [Source:HGNC Symbol;Acc:HGNC:55316]	-1.25347	2.24144	2.99692e-06	3.95647e-05	Down-regulated
ENSG00000179954	SSC5D	scavenger receptor cysteine rich family member with 5 domains [Source:HGNC Symbol;Acc:HGNC:26641]	-2.20115	-0.198432	3.00098e-06	3.95893e-05	Down-regulated
ENSG00000156966	B3GNT7	UDP-GlcNAc:betaGal beta-1,3-N-acetylglucosaminyltransferase 7 [Source:HGNC Symbol;Acc:HGNC:18811]	1.23419	3.49248	3.06178e-06	4.0303e-05	Up-regulated
ENSG00000272501	0	novel transcript, antisense to HCG27	-1.39202	2.42938	3.23782e-06	4.23425e-05	Down-regulated
ENSG00000120756	PLS1	plastin 1 [Source:HGNC Symbol;Acc:HGNC:9090]	1.05249	6.15141	3.24871e-06	4.24542e-05	Up-regulated
ENSG00000138030	KHK	ketohexokinase [Source:HGNC Symbol;Acc:HGNC:6315]	1.3178	4.2689	3.26492e-06	4.26043e-05	Up-regulated
ENSG00000105398	SULT2A1	sulfotransferase family 2A member 1 [Source:HGNC Symbol;Acc:HGNC:11458]	1.10764	5.55952	3.28937e-06	4.27998e-05	Up-regulated
ENSG00000124313	IQSEC2	IQ motif and Sec7 domain ArfGEF 2 [Source:HGNC Symbol;Acc:HGNC:29059]	1.085	3.09818	3.2998e-06	4.28652e-05	Up-regulated
ENSG00000273702	0	novel transcript	-1.30167	3.04698	3.30152e-06	4.28652e-05	Down-regulated
ENSG00000165029	ABCA1	ATP binding cassette subfamily A member 1 [Source:HGNC Symbol;Acc:HGNC:29]	1.54988	4.40369	3.30689e-06	4.2904e-05	Up-regulated
ENSG00000183486	MX2	MX dynamin like GTPase 2 [Source:HGNC Symbol;Acc:HGNC:7533]	1.48914	1.64311	3.31332e-06	4.29566e-05	Up-regulated
ENSG00000157077	ZFYVE9	zinc finger FYVE-type containing 9 [Source:HGNC Symbol;Acc:HGNC:6775]	1.05358	4.49438	3.37826e-06	4.36731e-05	Up-regulated
ENSG00000135220	UGT2A3	UDP glucuronosyltransferase family 2 member A3 [Source:HGNC Symbol;Acc:HGNC:28528]	1.01775	7.39622	3.39095e-06	4.38059e-05	Up-regulated
ENSG00000288919	0	novel transcript	-1.60544	1.41109	3.40086e-06	4.39004e-05	Down-regulated
ENSG00000159618	ADGRG5	adhesion G protein-coupled receptor G5 [Source:HGNC Symbol;Acc:HGNC:19010]	1.42361	2.07543	3.42561e-06	4.41588e-05	Up-regulated
ENSG00000106366	SERPINE1	serpin family E member 1 [Source:HGNC Symbol;Acc:HGNC:8583]	-2.23361	0.517753	3.44316e-06	4.43218e-05	Down-regulated
ENSG00000288814	0	novel transcript	-2.20368	-0.897974	3.46319e-06	4.45478e-05	Down-regulated
ENSG00000179921	GPBAR1	G protein-coupled bile acid receptor 1 [Source:HGNC Symbol;Acc:HGNC:19680]	-2.43562	0.592343	3.47251e-06	4.46043e-05	Down-regulated
ENSG00000245149	RNF139-DT	RNF139 divergent transcript [Source:HGNC Symbol;Acc:HGNC:48940]	-1.21013	2.56679	3.53322e-06	4.52232e-05	Down-regulated
ENSG00000253716	MINCR	MYC-induced long non-coding RNA [Source:HGNC Symbol;Acc:HGNC:51653]	-1.10745	2.49891	3.55352e-06	4.54509e-05	Down-regulated
ENSG00000181649	PHLDA2	pleckstrin homology like domain family A member 2 [Source:HGNC Symbol;Acc:HGNC:12385]	-1.63087	1.25234	3.57164e-06	4.56179e-05	Down-regulated
ENSG00000273045	C2orf15	chromosome 2 open reading frame 15 [Source:HGNC Symbol;Acc:HGNC:28436]	1.0155	3.31438	3.58851e-06	4.5801e-05	Up-regulated
ENSG00000164411	GJB7	gap junction protein beta 7 [Source:HGNC Symbol;Acc:HGNC:16690]	1.88734	1.00002	3.60684e-06	4.60025e-05	Up-regulated
ENSG00000289115	0	novel transcript, antisense to ZNF574	-3.8413	-0.753372	3.62968e-06	4.62611e-05	Down-regulated
ENSG00000113369	ARRDC3	arrestin domain containing 3 [Source:HGNC Symbol;Acc:HGNC:29263]	-1.43016	5.62645	3.67133e-06	4.66274e-05	Down-regulated
ENSG00000182253	SYNM	synemin [Source:HGNC Symbol;Acc:HGNC:24466]	-1.51994	1.63987	3.74337e-06	4.73427e-05	Down-regulated
ENSG00000289009	0	novel transcript, antisense to ITGB2	-1.03053	2.91118	3.7528e-06	4.73955e-05	Down-regulated
ENSG00000288095	0	novel transcript	-1.25924	2.26655	3.76319e-06	4.74603e-05	Down-regulated
ENSG00000260441	0	novel transcript, antisense to PLA2G15	-2.92866	-0.590815	3.80496e-06	4.78299e-05	Down-regulated
ENSG00000261167	0	novel transcript, overlapping to MRPL3	1.0151	2.12537	3.80574e-06	4.78299e-05	Up-regulated
ENSG00000268403	0	novel transcript, antisense to ZNF143	-2.07752	3.72345	3.82851e-06	4.80159e-05	Down-regulated
ENSG00000096872	IFT74	intraflagellar transport 74 [Source:HGNC Symbol;Acc:HGNC:21424]	1.16295	2.59088	3.84722e-06	4.82171e-05	Up-regulated
ENSG00000100836	PABPN1	poly(A) binding protein nuclear 1 [Source:HGNC Symbol;Acc:HGNC:8565]	-1.02239	5.86342	3.88558e-06	4.86042e-05	Down-regulated
ENSG00000244067	GSTA2	glutathione S-transferase alpha 2 [Source:HGNC Symbol;Acc:HGNC:4627]	1.10413	7.7051	3.88887e-06	4.86042e-05	Up-regulated
ENSG00000285517	0	long intergenic non-protein coding RNA 941	-2.7921	-1.39477	3.92871e-06	4.88794e-05	Down-regulated
ENSG00000241458	RPL7P19	ribosomal protein L7 pseudogene 19 [Source:HGNC Symbol;Acc:HGNC:36268]	-3.54087	-0.626569	3.94642e-06	4.90137e-05	Down-regulated
ENSG00000082397	EPB41L3	erythrocyte membrane protein band 4.1 like 3 [Source:HGNC Symbol;Acc:HGNC:3380]	1.97851	3.30479	3.9477e-06	4.90137e-05	Up-regulated
ENSG00000197019	SERTAD1	SERTA domain containing 1 [Source:HGNC Symbol;Acc:HGNC:17932]	-1.20936	3.70642	4.06538e-06	5.01508e-05	Down-regulated
ENSG00000203497	PDCD4-AS1	PDCD4 antisense RNA 1 [Source:HGNC Symbol;Acc:HGNC:27425]	-1.11799	2.50028	4.08576e-06	5.03278e-05	Down-regulated
ENSG00000173805	HAP1	huntingtin associated protein 1 [Source:HGNC Symbol;Acc:HGNC:4812]	-1.27004	3.74265	4.11046e-06	5.0473e-05	Down-regulated
ENSG00000160808	MYL3	myosin light chain 3 [Source:HGNC Symbol;Acc:HGNC:7584]	1.00395	3.53544	4.14337e-06	5.08351e-05	Up-regulated
ENSG00000227354	RBM26-AS1	RBM26 antisense RNA 1 [Source:HGNC Symbol;Acc:HGNC:39805]	-1.34089	2.33898	4.14698e-06	5.08448e-05	Down-regulated
ENSG00000285244	DINOL	damage induced long noncoding RNA [Source:HGNC Symbol;Acc:HGNC:53146]	-1.66547	-0.0377821	4.17136e-06	5.10744e-05	Down-regulated
ENSG00000278828	H3C10	H3 clustered histone 10 [Source:HGNC Symbol;Acc:HGNC:4775]	-1.35817	2.49636	4.18907e-06	5.12218e-05	Down-regulated
ENSG00000278963	0	TEC	-2.97314	0.21343	4.20962e-06	5.13687e-05	Down-regulated
ENSG00000114124	GRK7	G protein-coupled receptor kinase 7 [Source:HGNC Symbol;Acc:HGNC:17031]	-2.08988	-0.401295	4.37127e-06	5.32693e-05	Down-regulated
ENSG00000115221	ITGB6	integrin subunit beta 6 [Source:HGNC Symbol;Acc:HGNC:6161]	1.47984	3.67546	4.38219e-06	5.33003e-05	Up-regulated
ENSG00000205740	0	novel transcript, antisense to GTPBP4	-1.77027	0.333708	4.38266e-06	5.33003e-05	Down-regulated
ENSG00000124126	PREX1	phosphatidylinositol-3,4,5-trisphosphate dependent Rac exchange factor 1 [Source:HGNC Symbol;Acc:HGNC:32594]	1.78725	1.29896	4.39829e-06	5.34544e-05	Up-regulated
ENSG00000283635	0	novel transcript, antisense to PER2	-2.91108	-0.920116	4.40904e-06	5.3549e-05	Down-regulated
ENSG00000260633	0	novel transcript	-1.33773	1.68726	4.55314e-06	5.49664e-05	Down-regulated
ENSG00000265683	SYPL1P2	synaptophysin like 1 pseudogene 2 [Source:HGNC Symbol;Acc:HGNC:53547]	-2.37701	0.360053	4.56962e-06	5.50549e-05	Down-regulated
ENSG00000131781	FMO5	flavin containing dimethylaniline monoxygenase 5 [Source:HGNC Symbol;Acc:HGNC:3773]	1.02181	5.58791	4.58877e-06	5.51752e-05	Up-regulated
ENSG00000273320	0	novel transcript, antisense to NAMPT	-1.05631	2.28568	4.5976e-06	5.52446e-05	Down-regulated
ENSG00000289038	0	novel transcript, antisense to YIPF6	-2.07167	-1.09719	4.60851e-06	5.53022e-05	Down-regulated
ENSG00000105737	GRIK5	glutamate ionotropic receptor kainate type subunit 5 [Source:HGNC Symbol;Acc:HGNC:4583]	-2.71937	-0.401282	4.61173e-06	5.5304e-05	Down-regulated
ENSG00000233223	0	novel transcript, antisense to MPDU1 and CD68	-1.36263	2.01731	4.61551e-06	5.53126e-05	Down-regulated
ENSG00000109265	CRACD	capping protein inhibiting regulator of actin dynamics [Source:HGNC Symbol;Acc:HGNC:29219]	1.40637	2.69118	4.68683e-06	5.60186e-05	Up-regulated
ENSG00000080603	SRCAP	Snf2 related CREBBP activator protein [Source:HGNC Symbol;Acc:HGNC:16974]	-1.18674	2.02687	4.75554e-06	5.66151e-05	Down-regulated
ENSG00000260088	DDX59-AS1	DDX59 antisense RNA 1 [Source:HGNC Symbol;Acc:HGNC:41094]	-2.41767	-0.673824	4.78571e-06	5.68618e-05	Down-regulated
ENSG00000158125	XDH	xanthine dehydrogenase [Source:HGNC Symbol;Acc:HGNC:12805]	1.6461	2.2674	4.84213e-06	5.74566e-05	Up-regulated
ENSG00000173200	PARP15	poly(ADP-ribose) polymerase family member 15 [Source:HGNC Symbol;Acc:HGNC:26876]	1.86107	1.31261	4.89766e-06	5.79631e-05	Up-regulated
ENSG00000137825	ITPKA	inositol-trisphosphate 3-kinase A [Source:HGNC Symbol;Acc:HGNC:6178]	1.19841	3.22433	4.91493e-06	5.80972e-05	Up-regulated
ENSG00000215154	0	potassium channel tetramerisation domain containing 5 (KCTD5) pseudogene	-1.14875	1.43452	4.93546e-06	5.82197e-05	Down-regulated
ENSG00000245694	CRNDE	colorectal neoplasia differentially expressed [Source:HGNC Symbol;Acc:HGNC:37078]	-1.20063	1.98852	4.98128e-06	5.86836e-05	Down-regulated
ENSG00000166106	ADAMTS15	ADAM metallopeptidase with thrombospondin type 1 motif 15 [Source:HGNC Symbol;Acc:HGNC:16305]	1.47133	5.07339	5.02288e-06	5.90015e-05	Up-regulated
ENSG00000074964	ARHGEF10L	Rho guanine nucleotide exchange factor 10 like [Source:HGNC Symbol;Acc:HGNC:25540]	1.18334	4.23664	5.11144e-06	5.99433e-05	Up-regulated
ENSG00000285672	0	novel transcript	-3.54251	-1.96658	5.1398e-06	6.01587e-05	Down-regulated
ENSG00000229931	ATXN1-AS1	ATXN1 antisense RNA 1 [Source:HGNC Symbol;Acc:HGNC:40515]	-1.00604	3.30628	5.26832e-06	6.13083e-05	Down-regulated
ENSG00000289519	0	novel transcript	1.08011	3.66205	5.28185e-06	6.14232e-05	Up-regulated
ENSG00000184574	LPAR5	lysophosphatidic acid receptor 5 [Source:HGNC Symbol;Acc:HGNC:13307]	1.18646	2.04908	5.31913e-06	6.17772e-05	Up-regulated
ENSG00000159409	CELF3	CUGBP Elav-like family member 3 [Source:HGNC Symbol;Acc:HGNC:11967]	1.59317	2.90819	5.40374e-06	6.25587e-05	Up-regulated
ENSG00000187066	TMEM262	transmembrane protein 262 [Source:HGNC Symbol;Acc:HGNC:49389]	-3.04915	-1.44776	5.44664e-06	6.27745e-05	Down-regulated
ENSG00000279865	0	TEC	-1.42215	2.21616	5.50801e-06	6.33597e-05	Down-regulated
ENSG00000151276	MAGI1	membrane associated guanylate kinase, WW and PDZ domain containing 1 [Source:HGNC Symbol;Acc:HGNC:946]	1.15555	5.67658	5.55684e-06	6.37995e-05	Up-regulated
ENSG00000184774	MGAT4EP	MGAT4 family member E, pseudogene [Source:HGNC Symbol;Acc:HGNC:49418]	-1.50589	0.516215	5.58414e-06	6.39909e-05	Down-regulated
ENSG00000272031	ANKRD34A	ankyrin repeat domain 34A [Source:HGNC Symbol;Acc:HGNC:27639]	-1.61138	0.872513	5.6298e-06	6.43915e-05	Down-regulated
ENSG00000279696	0	novel transcript	-1.66404	3.17748	5.66712e-06	6.46546e-05	Down-regulated
ENSG00000255236	CHKA-DT	CHKA divergent transcript [Source:HGNC Symbol;Acc:HGNC:55504]	-1.57227	2.32767	5.69152e-06	6.48101e-05	Down-regulated
ENSG00000273275	0	novel transcript	-1.99932	0.388939	5.69912e-06	6.48187e-05	Down-regulated
ENSG00000172361	CFAP53	cilia and flagella associated protein 53 [Source:HGNC Symbol;Acc:HGNC:26530]	-1.72588	0.184733	5.75618e-06	6.52582e-05	Down-regulated
ENSG00000120875	DUSP4	dual specificity phosphatase 4 [Source:HGNC Symbol;Acc:HGNC:3070]	-1.72847	2.34469	5.8054e-06	6.56333e-05	Down-regulated
ENSG00000196482	ESRRG	estrogen related receptor gamma [Source:HGNC Symbol;Acc:HGNC:3474]	4.12933	1.0975	5.87811e-06	6.62664e-05	Up-regulated
ENSG00000260400	0	novel transcript, overlapping to TET1	1.19617	2.53759	5.9783e-06	6.71861e-05	Up-regulated
ENSG00000189233	NUGGC	nuclear GTPase, germinal center associated [Source:HGNC Symbol;Acc:HGNC:33550]	1.69019	2.018	6.00035e-06	6.7392e-05	Up-regulated
ENSG00000134954	ETS1	ETS proto-oncogene 1, transcription factor [Source:HGNC Symbol;Acc:HGNC:3488]	-1.34668	2.32849	6.34425e-06	7.05524e-05	Down-regulated
ENSG00000137699	TRIM29	tripartite motif containing 29 [Source:HGNC Symbol;Acc:HGNC:17274]	-1.28273	2.25632	6.51807e-06	7.23073e-05	Down-regulated
ENSG00000135407	AVIL	advillin [Source:HGNC Symbol;Acc:HGNC:14188]	-1.30653	0.989113	6.54115e-06	7.24744e-05	Down-regulated
ENSG00000165125	TRPV6	transient receptor potential cation channel subfamily V member 6 [Source:HGNC Symbol;Acc:HGNC:14006]	-1.92681	0.929451	6.60768e-06	7.31666e-05	Down-regulated
ENSG00000077782	FGFR1	fibroblast growth factor receptor 1 [Source:HGNC Symbol;Acc:HGNC:3688]	-1.62551	1.29281	6.66599e-06	7.36317e-05	Down-regulated
ENSG00000244607	CCDC13	coiled-coil domain containing 13 [Source:HGNC Symbol;Acc:HGNC:26358]	-2.07254	0.439467	6.71177e-06	7.39564e-05	Down-regulated
ENSG00000106328	FSCN3	fascin actin-bundling protein 3 [Source:HGNC Symbol;Acc:HGNC:3961]	-2.19799	1.05531	6.80194e-06	7.45859e-05	Down-regulated
ENSG00000285867	0	Novel transcript	-1.97894	-0.256598	6.88538e-06	7.5455e-05	Down-regulated
ENSG00000138792	ENPEP	glutamyl aminopeptidase [Source:HGNC Symbol;Acc:HGNC:3355]	-1.15678	3.30916	6.92369e-06	7.5783e-05	Down-regulated
ENSG00000143627	PKLR	pyruvate kinase L/R [Source:HGNC Symbol;Acc:HGNC:9020]	1.32487	3.68638	6.99629e-06	7.63924e-05	Up-regulated
ENSG00000172159	FRMD3	FERM domain containing 3 [Source:HGNC Symbol;Acc:HGNC:24125]	1.84671	2.69275	7.04539e-06	7.68787e-05	Up-regulated
ENSG00000257354	MIRLET7IHG	MIRLET7I host gene [Source:HGNC Symbol;Acc:HGNC:55478]	-1.11118	3.10289	7.24388e-06	7.87624e-05	Down-regulated
ENSG00000231663	COA6-AS1	COA6 antisense RNA 1 [Source:HGNC Symbol;Acc:HGNC:40825]	-1.38383	1.68751	7.28766e-06	7.90956e-05	Down-regulated
ENSG00000148377	IDI2	isopentenyl-diphosphate delta isomerase 2 [Source:HGNC Symbol;Acc:HGNC:23487]	-2.3081	-0.0310304	7.30586e-06	7.92456e-05	Down-regulated
ENSG00000169372	CRADD	CASP2 and RIPK1 domain containing adaptor with death domain [Source:HGNC Symbol;Acc:HGNC:2340]	1.11744	2.89589	7.57131e-06	8.15858e-05	Up-regulated
ENSG00000287510	0	novel transcript, antisense to LAPTM5	-2.14011	-0.67924	7.59246e-06	8.17101e-05	Down-regulated
ENSG00000158825	CDA	cytidine deaminase [Source:HGNC Symbol;Acc:HGNC:1712]	1.12578	3.27708	7.61548e-06	8.18193e-05	Up-regulated
ENSG00000183696	UPP1	uridine phosphorylase 1 [Source:HGNC Symbol;Acc:HGNC:12576]	-1.03249	2.38602	7.73711e-06	8.29311e-05	Down-regulated
ENSG00000266677	0	novel transcript	-2.56078	-1.14317	7.81285e-06	8.3496e-05	Down-regulated
ENSG00000143110	C1orf162	chromosome 1 open reading frame 162 [Source:HGNC Symbol;Acc:HGNC:28344]	-1.65953	3.02699	7.8133e-06	8.3496e-05	Down-regulated
ENSG00000287089	0	novel transcript, antisense to MLN	-2.58753	-0.0525679	7.97085e-06	8.50287e-05	Down-regulated
ENSG00000139890	REM2	RRAD and GEM like GTPase 2 [Source:HGNC Symbol;Acc:HGNC:20248]	-1.88034	0.720141	8.04581e-06	8.56285e-05	Down-regulated
ENSG00000245293	CYP2U1-AS1	CYP2U1 and SGMS2 antisense RNA 1 [Source:HGNC Symbol;Acc:HGNC:54817]	1.75441	1.60857	8.05897e-06	8.57155e-05	Up-regulated
ENSG00000072195	SPEG	striated muscle enriched protein kinase [Source:HGNC Symbol;Acc:HGNC:16901]	1.05963	2.77028	8.10649e-06	8.61195e-05	Up-regulated
ENSG00000204420	MPIG6B	megakaryocyte and platelet inhibitory receptor G6b [Source:HGNC Symbol;Acc:HGNC:13937]	-1.92372	-0.710666	8.19512e-06	8.68271e-05	Down-regulated
ENSG00000172638	EFEMP2	EGF containing fibulin extracellular matrix protein 2 [Source:HGNC Symbol;Acc:HGNC:3219]	-1.3933	2.40898	8.34029e-06	8.81367e-05	Down-regulated
ENSG00000206344	HCG27	HLA complex group 27 [Source:HGNC Symbol;Acc:HGNC:27366]	-1.61891	1.62451	8.43355e-06	8.90701e-05	Down-regulated
ENSG00000184716	SERINC4	serine incorporator 4 [Source:HGNC Symbol;Acc:HGNC:32237]	-2.93722	-0.267061	8.4814e-06	8.93982e-05	Down-regulated
ENSG00000167080	B4GALNT2	beta-1,4-N-acetyl-galactosaminyltransferase 2 [Source:HGNC Symbol;Acc:HGNC:24136]	1.21104	3.78643	8.48441e-06	8.93982e-05	Up-regulated
ENSG00000146112	PPP1R18	protein phosphatase 1 regulatory subunit 18 [Source:HGNC Symbol;Acc:HGNC:29413]	-1.03155	3.06611	8.58477e-06	9.03502e-05	Down-regulated
ENSG00000205269	TMEM170B	transmembrane protein 170B [Source:HGNC Symbol;Acc:HGNC:34244]	1.0579	2.69577	8.64086e-06	9.08346e-05	Up-regulated
ENSG00000236830	CBR3-AS1	CBR3 antisense RNA 1 [Source:HGNC Symbol;Acc:HGNC:43664]	-1.00391	3.95521	8.69052e-06	9.13036e-05	Down-regulated
ENSG00000261884	0	novel transcript	-1.20023	1.10364	8.94615e-06	9.3343e-05	Down-regulated
ENSG00000289410	0	novel transcript	-1.78494	0.494875	9.01233e-06	9.37033e-05	Down-regulated
ENSG00000099860	GADD45B	growth arrest and DNA damage inducible beta [Source:HGNC Symbol;Acc:HGNC:4096]	-1.45762	3.44054	9.05132e-06	9.40546e-05	Down-regulated
ENSG00000260619	0	novel transcript	-2.48136	-0.273157	9.31681e-06	9.63146e-05	Down-regulated
ENSG00000269961	ERBIN-DT	ERBIN divergent transcript [Source:HGNC Symbol;Acc:HGNC:55270]	-1.34691	0.689372	9.38611e-06	9.69201e-05	Down-regulated
ENSG00000227359	0	novel transcript	-1.13202	0.640179	9.48106e-06	9.78445e-05	Down-regulated
ENSG00000287737	0	novel transcript	-1.63723	1.97884	9.54421e-06	9.82157e-05	Down-regulated
ENSG00000256525	POLG2	DNA polymerase gamma 2, accessory subunit [Source:HGNC Symbol;Acc:HGNC:9180]	-1.00734	4.29429	9.63078e-06	9.88811e-05	Down-regulated
ENSG00000100908	EMC9	ER membrane protein complex subunit 9 [Source:HGNC Symbol;Acc:HGNC:20273]	-1.35217	2.62545	9.65047e-06	9.89708e-05	Down-regulated
ENSG00000187045	TMPRSS6	transmembrane serine protease 6 [Source:HGNC Symbol;Acc:HGNC:16517]	1.11914	5.75133	9.66404e-06	9.90537e-05	Up-regulated
ENSG00000115255	REEP6	receptor accessory protein 6 [Source:HGNC Symbol;Acc:HGNC:30078]	1.34631	5.37423	9.69958e-06	9.93154e-05	Up-regulated
ENSG00000197702	PARVA	parvin alpha [Source:HGNC Symbol;Acc:HGNC:14652]	-1.01956	2.66647	9.77331e-06	0.000100003	Down-regulated
ENSG00000272103	0	novel transcript	-2.0125	0.480465	9.93155e-06	0.000101507	Down-regulated
ENSG00000163874	ZC3H12A	zinc finger CCCH-type containing 12A [Source:HGNC Symbol;Acc:HGNC:26259]	-1.2459	3.46933	1.00952e-05	0.000102831	Down-regulated
ENSG00000169519	METTL15	methyltransferase like 15 [Source:HGNC Symbol;Acc:HGNC:26606]	1.0451	2.98372	1.02047e-05	0.000103829	Up-regulated
ENSG00000105926	PALS2	protein associated with LIN7 2, MAGUK family member [Source:HGNC Symbol;Acc:HGNC:18167]	1.05082	4.75693	1.03284e-05	0.000104852	Up-regulated
ENSG00000251602	0	novel transcript, antisense to MTA1	1.01737	2.78676	1.05115e-05	0.000106411	Up-regulated
ENSG00000165591	FAAH2	fatty acid amide hydrolase 2 [Source:HGNC Symbol;Acc:HGNC:26440]	1.09373	2.94504	1.07032e-05	0.00010811	Up-regulated
ENSG00000205678	TECRL	trans-2,3-enoyl-CoA reductase like [Source:HGNC Symbol;Acc:HGNC:27365]	1.59698	1.90946	1.07093e-05	0.00010811	Up-regulated
ENSG00000152527	PLEKHH2	pleckstrin homology, MyTH4 and FERM domain containing H2 [Source:HGNC Symbol;Acc:HGNC:30506]	-2.0397	1.2009	1.08831e-05	0.00010962	Down-regulated
ENSG00000279641	0	TEC	-3.50434	-1.81727	1.0903e-05	0.000109759	Down-regulated
ENSG00000204758	0	novel transcript, antisense to RPL26L1	-1.00482	1.62352	1.09095e-05	0.000109763	Down-regulated
ENSG00000286532	PARTICL	promoter of MAT2A antisense radiation-induced circulating long non-coding RNA [Source:HGNC Symbol;Acc:HGNC:50886]	-1.22051	2.48885	1.09221e-05	0.000109804	Down-regulated
ENSG00000122035	RASL11A	RAS like family 11 member A [Source:HGNC Symbol;Acc:HGNC:23802]	-1.18284	3.68893	1.09872e-05	0.0001103	Down-regulated
ENSG00000202337	RNU6-8	RNA, U6 small nuclear 8 [Source:HGNC Symbol;Acc:HGNC:34285]	-2.15055	0.416266	1.10002e-05	0.000110359	Down-regulated
ENSG00000159164	SV2A	synaptic vesicle glycoprotein 2A [Source:HGNC Symbol;Acc:HGNC:20566]	-1.16437	1.87932	1.10404e-05	0.000110584	Down-regulated
ENSG00000168843	FSTL5	follistatin like 5 [Source:HGNC Symbol;Acc:HGNC:21386]	1.30141	1.53248	1.10851e-05	0.000110851	Up-regulated
ENSG00000167011	NAT16	N-acetyltransferase 16 (putative) [Source:HGNC Symbol;Acc:HGNC:22030]	-1.66229	-0.0497596	1.11247e-05	0.000111124	Down-regulated
ENSG00000132259	CNGA4	cyclic nucleotide gated channel subunit alpha 4 [Source:HGNC Symbol;Acc:HGNC:2152]	-1.86282	-0.577289	1.128e-05	0.000112364	Down-regulated
ENSG00000262874	C19orf84	chromosome 19 open reading frame 84 [Source:HGNC Symbol;Acc:HGNC:27112]	-3.54944	-2.18248	1.13557e-05	0.000112993	Down-regulated
ENSG00000167302	TEPSIN	TEPSIN adaptor related protein complex 4 accessory protein [Source:HGNC Symbol;Acc:HGNC:26458]	-1.10043	4.42321	1.14429e-05	0.00011377	Down-regulated
ENSG00000155016	CYP2U1	cytochrome P450 family 2 subfamily U member 1 [Source:HGNC Symbol;Acc:HGNC:20582]	1.03293	3.5187	1.1467e-05	0.000113913	Up-regulated
ENSG00000155926	SLA	Src like adaptor [Source:HGNC Symbol;Acc:HGNC:10902]	1.41826	2.17051	1.15317e-05	0.000114304	Up-regulated
ENSG00000259826	CDK13-DT	CDK13 divergent transcript [Source:HGNC Symbol;Acc:HGNC:55407]	-1.55689	1.77401	1.1552e-05	0.000114443	Down-regulated
ENSG00000277459	0	novel transcript	-2.37837	-0.61596	1.18275e-05	0.000116852	Down-regulated
ENSG00000167034	NKX3-1	NK3 homeobox 1 [Source:HGNC Symbol;Acc:HGNC:7838]	-1.07854	1.36182	1.1915e-05	0.000117395	Down-regulated
ENSG00000288103	0	novel transcript	-2.92269	-0.646813	1.20421e-05	0.000118481	Down-regulated
ENSG00000211459	MT-RNR1	mitochondrially encoded 12S rRNA [Source:HGNC Symbol;Acc:HGNC:7470]	-1.58245	12.0998	1.21385e-05	0.000119013	Down-regulated
ENSG00000252690	0	TEC	-1.53994	1.12703	1.22749e-05	0.000120154	Down-regulated
ENSG00000181378	CFAP65	cilia and flagella associated protein 65 [Source:HGNC Symbol;Acc:HGNC:25325]	1.01357	2.52183	1.23102e-05	0.000120239	Up-regulated
ENSG00000106351	AGFG2	ArfGAP with FG repeats 2 [Source:HGNC Symbol;Acc:HGNC:5177]	1.17341	4.62551	1.2328e-05	0.000120348	Up-regulated
ENSG00000280157	0	TEC	-1.99876	0.474855	1.24663e-05	0.00012137	Down-regulated
ENSG00000272056	0	novel transcript, antisense to AGBL5	-2.31186	0.463723	1.25053e-05	0.000121684	Down-regulated
ENSG00000166825	ANPEP	alanyl aminopeptidase, membrane [Source:HGNC Symbol;Acc:HGNC:500]	1.0472	7.55393	1.26493e-05	0.000122947	Up-regulated
ENSG00000285829	0	novel transcript	-2.76696	-1.59154	1.26692e-05	0.000122947	Down-regulated
ENSG00000107902	LHPP	phospholysine phosphohistidine inorganic pyrophosphate phosphatase [Source:HGNC Symbol;Acc:HGNC:30042]	1.72397	4.85071	1.26942e-05	0.000123124	Up-regulated
ENSG00000254827	SLC22A18AS	solute carrier family 22 member 18 antisense [Source:HGNC Symbol;Acc:HGNC:10965]	1.4747	1.28591	1.28028e-05	0.000124043	Up-regulated
ENSG00000179588	ZFPM1	zinc finger protein, FOG family member 1 [Source:HGNC Symbol;Acc:HGNC:19762]	1.48037	2.27559	1.28096e-05	0.000124043	Up-regulated
ENSG00000152642	GPD1L	glycerol-3-phosphate dehydrogenase 1 like [Source:HGNC Symbol;Acc:HGNC:28956]	1.14639	3.32005	1.29028e-05	0.000124879	Up-regulated
ENSG00000274184	0	novel transcript, antisense to ZSCAN30	-1.89176	-0.425409	1.30094e-05	0.000125709	Down-regulated
ENSG00000145632	PLK2	polo like kinase 2 [Source:HGNC Symbol;Acc:HGNC:19699]	-1.50071	5.90237	1.31264e-05	0.000126636	Down-regulated
ENSG00000214595	EML6	EMAP like 6 [Source:HGNC Symbol;Acc:HGNC:35412]	-1.13148	3.67599	1.32792e-05	0.000127633	Down-regulated
ENSG00000176749	CDK5R1	cyclin dependent kinase 5 regulatory subunit 1 [Source:HGNC Symbol;Acc:HGNC:1775]	-1.46344	2.13743	1.33521e-05	0.00012824	Down-regulated
ENSG00000285646	0	novel transcript	-1.8438	0.130064	1.33686e-05	0.000128287	Down-regulated
ENSG00000076864	RAP1GAP	RAP1 GTPase activating protein [Source:HGNC Symbol;Acc:HGNC:9858]	1.19338	2.9416	1.34384e-05	0.000128691	Up-regulated
ENSG00000025708	TYMP	thymidine phosphorylase [Source:HGNC Symbol;Acc:HGNC:3148]	-1.51748	-0.2063	1.34988e-05	0.000129072	Down-regulated
ENSG00000231305	0	novel transcript	-1.5312	0.661984	1.35003e-05	0.000129072	Down-regulated
ENSG00000247679	0	novel transcript	-1.02099	2.29904	1.35415e-05	0.000129328	Down-regulated
ENSG00000183087	GAS6	growth arrest specific 6 [Source:HGNC Symbol;Acc:HGNC:4168]	1.2891	3.01697	1.36499e-05	0.000130157	Up-regulated
ENSG00000257497	0	novel transcript, antisense to GLIPR1	-1.02976	2.72479	1.3768e-05	0.000131144	Down-regulated
ENSG00000275703	0	novel transcript	-2.13243	0.064549	1.38046e-05	0.000131424	Down-regulated
ENSG00000234160	0	novel transcript	-1.23546	0.581657	1.40031e-05	0.000133103	Down-regulated
ENSG00000204421	LY6G6C	lymphocyte antigen 6 family member G6C [Source:HGNC Symbol;Acc:HGNC:13936]	-2.32271	1.76547	1.41314e-05	0.00013397	Down-regulated
ENSG00000268655	0	novel protein	-1.43166	1.50092	1.41404e-05	0.000133985	Down-regulated
ENSG00000228065	LINC01515	long intergenic non-protein coding RNA 1515 [Source:HGNC Symbol;Acc:HGNC:51210]	1.47658	1.88634	1.4175e-05	0.000134243	Up-regulated
ENSG00000059728	MXD1	MAX dimerization protein 1 [Source:HGNC Symbol;Acc:HGNC:6761]	-1.22538	5.15175	1.42081e-05	0.000134415	Down-regulated
ENSG00000167525	PROCA1	protein interacting with cyclin A1 [Source:HGNC Symbol;Acc:HGNC:28600]	-1.19455	3.25519	1.43273e-05	0.000135237	Down-regulated
ENSG00000132965	ALOX5AP	arachidonate 5-lipoxygenase activating protein [Source:HGNC Symbol;Acc:HGNC:436]	1.33555	2.52986	1.43325e-05	0.000135237	Up-regulated
ENSG00000235122	0	novel transcript	1.69813	1.84703	1.43434e-05	0.00013527	Up-regulated
ENSG00000204311	PJVK	pejvakin [Source:HGNC Symbol;Acc:HGNC:29502]	-1.2126	1.35275	1.442e-05	0.000135709	Down-regulated
ENSG00000085465	OVGP1	oviductal glycoprotein 1 [Source:HGNC Symbol;Acc:HGNC:8524]	-1.23034	2.91898	1.45574e-05	0.000136638	Down-regulated
ENSG00000185522	LMNTD2	lamin tail domain containing 2 [Source:HGNC Symbol;Acc:HGNC:28561]	-1.21553	3.67366	1.46924e-05	0.000137556	Down-regulated
ENSG00000177398	UMODL1	uromodulin like 1 [Source:HGNC Symbol;Acc:HGNC:12560]	1.77752	0.712004	1.48087e-05	0.000138358	Up-regulated
ENSG00000113525	IL5	interleukin 5 [Source:HGNC Symbol;Acc:HGNC:6016]	-2.03543	-0.354911	1.49153e-05	0.00013921	Down-regulated
ENSG00000254812	0	novel transcript	-2.16057	-0.792706	1.49694e-05	0.000139565	Down-regulated
ENSG00000086730	LAT2	linker for activation of T cells family member 2 [Source:HGNC Symbol;Acc:HGNC:12749]	-2.58139	-0.706625	1.49921e-05	0.000139565	Down-regulated
ENSG00000278611	ZNF426-DT	ZNF426 divergent transcript [Source:HGNC Symbol;Acc:HGNC:53777]	-1.31617	1.20659	1.50315e-05	0.000139789	Down-regulated
ENSG00000110944	IL23A	interleukin 23 subunit alpha [Source:HGNC Symbol;Acc:HGNC:15488]	-2.20013	0.095187	1.50854e-05	0.000140145	Down-regulated
ENSG00000288926	0	novel transcript	-1.13688	1.26712	1.53377e-05	0.000142051	Down-regulated
ENSG00000138738	PRDM5	PR/SET domain 5 [Source:HGNC Symbol;Acc:HGNC:9349]	1.08457	3.00662	1.53758e-05	0.000142294	Up-regulated
ENSG00000279689	0	TEC	-1.19943	2.93846	1.5435e-05	0.000142659	Down-regulated
ENSG00000140044	JDP2	Jun dimerization protein 2 [Source:HGNC Symbol;Acc:HGNC:17546]	1.10077	2.64324	1.55862e-05	0.000143836	Up-regulated
ENSG00000198515	CNGA1	cyclic nucleotide gated channel subunit alpha 1 [Source:HGNC Symbol;Acc:HGNC:2148]	1.07049	2.89909	1.56791e-05	0.000144545	Up-regulated
ENSG00000197061	H4C3	H4 clustered histone 3 [Source:HGNC Symbol;Acc:HGNC:4787]	-4.23131	-1.82319	1.59739e-05	0.000146963	Down-regulated
ENSG00000220201	ZGLP1	zinc finger GATA like protein 1 [Source:HGNC Symbol;Acc:HGNC:37245]	-1.96052	0.561209	1.6061e-05	0.000147539	Down-regulated
ENSG00000129151	BBOX1	gamma-butyrobetaine hydroxylase 1 [Source:HGNC Symbol;Acc:HGNC:964]	1.20102	2.87672	1.61092e-05	0.000147757	Up-regulated
ENSG00000113249	HAVCR1	hepatitis A virus cellular receptor 1 [Source:HGNC Symbol;Acc:HGNC:17866]	1.29427	8.12745	1.61791e-05	0.000148171	Up-regulated
ENSG00000186019	0	novel transcript, antisense to ZNF225 and ZNF224	-1.50499	-0.124943	1.69955e-05	0.000154863	Down-regulated
ENSG00000081026	MAGI3	membrane associated guanylate kinase, WW and PDZ domain containing 3 [Source:HGNC Symbol;Acc:HGNC:29647]	1.04339	4.58383	1.74947e-05	0.000158464	Up-regulated
ENSG00000229847	EMX2OS	EMX2 opposite strand/antisense RNA [Source:HGNC Symbol;Acc:HGNC:18511]	-2.50598	-1.11765	1.76045e-05	0.000159367	Down-regulated
ENSG00000182405	PGBD4	piggyBac transposable element derived 4 [Source:HGNC Symbol;Acc:HGNC:19401]	-1.05029	3.92294	1.76275e-05	0.000159416	Down-regulated
ENSG00000286048	0	novel transcript, antisense to ITGA2	-2.35831	-1.30331	1.77209e-05	0.00016018	Down-regulated
ENSG00000151224	MAT1A	methionine adenosyltransferase 1A [Source:HGNC Symbol;Acc:HGNC:6903]	1.44784	3.33115	1.77464e-05	0.00016033	Up-regulated
ENSG00000264112	0	novel transcript	-1.30473	5.09206	1.7899e-05	0.000161547	Down-regulated
ENSG00000279977	0	TEC	-3.54621	-1.76086	1.79652e-05	0.000162064	Down-regulated
ENSG00000267308	LINC01764	long intergenic non-protein coding RNA 1764 [Source:HGNC Symbol;Acc:HGNC:52553]	-2.35556	-0.341332	1.82162e-05	0.000164001	Down-regulated
ENSG00000167914	GSDMA	gasdermin A [Source:HGNC Symbol;Acc:HGNC:13311]	2.41008	-0.01457	1.8281e-05	0.00016442	Up-regulated
ENSG00000148735	PLEKHS1	pleckstrin homology domain containing S1 [Source:HGNC Symbol;Acc:HGNC:26285]	1.34423	1.71743	1.84435e-05	0.000165634	Up-regulated
ENSG00000084453	SLCO1A2	solute carrier organic anion transporter family member 1A2 [Source:HGNC Symbol;Acc:HGNC:10956]	1.31804	3.04772	1.87771e-05	0.00016763	Up-regulated
ENSG00000204103	MAFB	MAF bZIP transcription factor B [Source:HGNC Symbol;Acc:HGNC:6408]	-1.98483	0.590946	1.89153e-05	0.000168623	Down-regulated
ENSG00000218631	0	novel pseudogene	-1.75352	0.429592	1.89163e-05	0.000168623	Down-regulated
ENSG00000109452	INPP4B	inositol polyphosphate-4-phosphatase type II B [Source:HGNC Symbol;Acc:HGNC:6075]	1.93061	3.75956	1.90528e-05	0.00016942	Up-regulated
ENSG00000187686	KRT18P59	keratin 18 pseudogene 59 [Source:HGNC Symbol;Acc:HGNC:48886]	-1.25612	0.149062	1.9099e-05	0.000169664	Down-regulated
ENSG00000105146	AURKC	aurora kinase C [Source:HGNC Symbol;Acc:HGNC:11391]	-1.08937	1.95462	1.91483e-05	0.000169936	Down-regulated
ENSG00000230532	0	novel transcript	-1.15792	2.88964	1.94395e-05	0.00017176	Down-regulated
ENSG00000019505	SYT13	synaptotagmin 13 [Source:HGNC Symbol;Acc:HGNC:14962]	1.49173	2.25131	1.95054e-05	0.000172258	Up-regulated
ENSG00000273335	0	novel transcript	-1.51148	1.20624	1.95234e-05	0.000172294	Down-regulated
ENSG00000279199	0	novel transcript	-1.59276	1.19693	1.95426e-05	0.000172333	Down-regulated
ENSG00000232133	IMPDH1P10	inosine monophosphate dehydrogenase 1 pseudogene 10 [Source:HGNC Symbol;Acc:HGNC:33965]	-1.44424	0.26164	1.95521e-05	0.000172333	Down-regulated
ENSG00000238164	TNFRSF14-AS1	TNFRSF14 antisense RNA 1 [Source:HGNC Symbol;Acc:HGNC:26966]	1.57084	1.22086	1.96192e-05	0.00017259	Up-regulated
ENSG00000280088	0	TEC	1.098	3.81858	1.99923e-05	0.000175187	Up-regulated
ENSG00000187672	ERC2	ELKS/RAB6-interacting/CAST family member 2 [Source:HGNC Symbol;Acc:HGNC:31922]	1.51456	1.01381	2.00893e-05	0.000175867	Up-regulated
ENSG00000134548	SPX	spexin hormone [Source:HGNC Symbol;Acc:HGNC:28139]	-1.76492	-0.129449	2.02617e-05	0.000177033	Down-regulated
ENSG00000131470	PSMC3IP	PSMC3 interacting protein [Source:HGNC Symbol;Acc:HGNC:17928]	-1.30259	2.77369	2.03512e-05	0.000177643	Down-regulated
ENSG00000289043	0	novel transcript, antisense to NME6	-1.69114	1.91596	2.04068e-05	0.000177956	Down-regulated
ENSG00000280278	FLJ30679	uncharacterized protein FLJ30679 [Source:NCBI gene (formerly Entrezgene);Acc:146512]	-1.84144	0.266735	2.04267e-05	0.000177957	Down-regulated
ENSG00000212694	LINC01089	long intergenic non-protein coding RNA 1089 [Source:HGNC Symbol;Acc:HGNC:27886]	-1.1267	3.93126	2.05147e-05	0.00017855	Down-regulated
ENSG00000226312	CFLAR-AS1	CFLAR antisense RNA 1 [Source:HGNC Symbol;Acc:HGNC:14437]	-1.34553	1.27362	2.05244e-05	0.00017855	Down-regulated
ENSG00000287539	0	novel transcript	-1.2629	0.903548	2.06313e-05	0.000179394	Down-regulated
ENSG00000109771	LRP2BP	LRP2 binding protein [Source:HGNC Symbol;Acc:HGNC:25434]	-1.7068	0.960386	2.07641e-05	0.000180201	Down-regulated
ENSG00000270441	LAMB2P1	laminin subunit beta 2 pseudogene 1 [Source:HGNC Symbol;Acc:HGNC:6488]	-1.30736	1.61199	2.08407e-05	0.00018078	Down-regulated
ENSG00000203727	SAMD5	sterile alpha motif domain containing 5 [Source:HGNC Symbol;Acc:HGNC:21180]	-1.04245	3.52528	2.09417e-05	0.000181307	Down-regulated
ENSG00000104267	CA2	carbonic anhydrase 2 [Source:HGNC Symbol;Acc:HGNC:1373]	-1.05693	2.1095	2.09609e-05	0.000181386	Down-regulated
ENSG00000178882	RFLNA	refilin A [Source:HGNC Symbol;Acc:HGNC:27051]	1.14109	4.77256	2.09918e-05	0.00018148	Up-regulated
ENSG00000233558	0	RPS5 (40S Ribosomal Protein S5) pseudogene	-2.24226	-1.15641	2.14008e-05	0.00018475	Down-regulated
ENSG00000130305	NSUN5	NOP2/Sun RNA methyltransferase 5 [Source:HGNC Symbol;Acc:HGNC:16385]	-1.05797	4.25604	2.14492e-05	0.00018508	Down-regulated
ENSG00000288937	0	novel transcript	-1.40336	1.22165	2.1932e-05	0.000188255	Down-regulated
ENSG00000204681	GABBR1	gamma-aminobutyric acid type B receptor subunit 1 [Source:HGNC Symbol;Acc:HGNC:4070]	-1.27129	2.58513	2.20829e-05	0.000189192	Down-regulated
ENSG00000151229	SLC2A13	solute carrier family 2 member 13 [Source:HGNC Symbol;Acc:HGNC:15956]	1.44918	3.38794	2.21769e-05	0.000189818	Up-regulated
ENSG00000279259	0	TEC	-1.76489	0.145269	2.22378e-05	0.000190249	Down-regulated
ENSG00000289537	0	novel transcript, antisense to SS18L1	-1.72441	0.279828	2.22748e-05	0.000190475	Down-regulated
ENSG00000233554	B4GALT1-AS1	B4GALT1 antisense RNA 1 [Source:HGNC Symbol;Acc:HGNC:49910]	-1.2674	0.85119	2.2287e-05	0.000190489	Down-regulated
ENSG00000167037	SGSM1	small G protein signaling modulator 1 [Source:HGNC Symbol;Acc:HGNC:29410]	1.56343	1.0693	2.23794e-05	0.00019099	Up-regulated
ENSG00000184454	NCMAP	non-compact myelin associated protein [Source:HGNC Symbol;Acc:HGNC:29332]	1.1528	1.70024	2.28972e-05	0.000194802	Up-regulated
ENSG00000251393	0	novel transcript, antisense to NUMB and HEATR4	1.34195	1.98445	2.3163e-05	0.000196212	Up-regulated
ENSG00000205795	CYS1	cystin 1 [Source:HGNC Symbol;Acc:HGNC:18525]	1.03362	2.93895	2.37806e-05	0.000200701	Up-regulated
ENSG00000203857	HSD3B1	hydroxy-delta-5-steroid dehydrogenase, 3 beta- and steroid delta-isomerase 1 [Source:HGNC Symbol;Acc:HGNC:5217]	1.37909	5.24859	2.37818e-05	0.000200701	Up-regulated
ENSG00000129355	CDKN2D	cyclin dependent kinase inhibitor 2D [Source:HGNC Symbol;Acc:HGNC:1790]	-1.26538	1.22929	2.39939e-05	0.000201924	Down-regulated
ENSG00000164418	GRIK2	glutamate ionotropic receptor kainate type subunit 2 [Source:HGNC Symbol;Acc:HGNC:4580]	1.01253	4.82133	2.40371e-05	0.000202194	Up-regulated
ENSG00000253549	CA3-AS1	CA3 antisense RNA 1 [Source:HGNC Symbol;Acc:HGNC:51657]	-2.1672	-1.19064	2.41355e-05	0.000202738	Down-regulated
ENSG00000216901	ZNF603P	zinc finger protein 603, pseudogene [Source:HGNC Symbol;Acc:HGNC:23322]	-2.06436	-0.054404	2.4212e-05	0.000203286	Down-regulated
ENSG00000135480	KRT7	keratin 7 [Source:HGNC Symbol;Acc:HGNC:6445]	-1.52671	2.01504	2.47429e-05	0.00020707	Down-regulated
ENSG00000105371	ICAM4	intercellular adhesion molecule 4 (Landsteiner-Wiener blood group) [Source:HGNC Symbol;Acc:HGNC:5347]	1.42985	0.619229	2.48233e-05	0.000207551	Up-regulated
ENSG00000253476	0	novel transcript	-2.20716	0.209814	2.50103e-05	0.000208727	Down-regulated
ENSG00000180767	CHST13	carbohydrate sulfotransferase 13 [Source:HGNC Symbol;Acc:HGNC:21755]	1.40307	2.1955	2.5268e-05	0.000210586	Up-regulated
ENSG00000213394	RPSAP46	ribosomal protein SA pseudogene 46 [Source:HGNC Symbol;Acc:HGNC:36082]	-2.06893	-1.51881	2.52841e-05	0.000210623	Down-regulated
ENSG00000248027	ARHGAP42-AS1	ARHGAP42 antisense RNA 1 [Source:HGNC Symbol;Acc:HGNC:54801]	-1.56095	0.0453655	2.61435e-05	0.000215594	Down-regulated
ENSG00000124249	KCNK15	potassium two pore domain channel subfamily K member 15 [Source:HGNC Symbol;Acc:HGNC:13814]	1.04571	1.93649	2.6249e-05	0.000216267	Up-regulated
ENSG00000243629	LINC00880	long intergenic non-protein coding RNA 880 [Source:HGNC Symbol;Acc:HGNC:27948]	-1.94266	-0.143176	2.62754e-05	0.000216386	Down-regulated
ENSG00000109113	RAB34	RAB34, member RAS oncogene family [Source:HGNC Symbol;Acc:HGNC:16519]	-1.31324	1.87415	2.6449e-05	0.000217617	Down-regulated
ENSG00000187546	AGMO	alkylglycerol monooxygenase [Source:HGNC Symbol;Acc:HGNC:33784]	2.15724	3.34869	2.65741e-05	0.000218547	Up-regulated
ENSG00000224635	0	novel transcript	-1.55798	1.55259	2.68629e-05	0.00022042	Down-regulated
ENSG00000182308	DCAF4L1	DDB1 and CUL4 associated factor 4 like 1 [Source:HGNC Symbol;Acc:HGNC:27723]	-1.78191	-0.0817915	2.72467e-05	0.000223366	Down-regulated
ENSG00000213398	LCAT	lecithin-cholesterol acyltransferase [Source:HGNC Symbol;Acc:HGNC:6522]	-1.38428	2.65542	2.77611e-05	0.000226965	Down-regulated
ENSG00000272631	0	novel transcript, antisense to BMPR1A	-1.10874	2.21981	2.81794e-05	0.00022945	Down-regulated
ENSG00000116285	ERRFI1	ERBB receptor feedback inhibitor 1 [Source:HGNC Symbol;Acc:HGNC:18185]	-1.09198	5.40634	2.85925e-05	0.000232234	Down-regulated
ENSG00000287185	0	novel transcript	-1.30788	-0.122285	2.88279e-05	0.000233467	Down-regulated
ENSG00000181652	ATG9B	autophagy related 9B [Source:HGNC Symbol;Acc:HGNC:21899]	-1.37797	3.38937	2.89091e-05	0.00023402	Down-regulated
ENSG00000273542	H4C12	H4 clustered histone 12 [Source:HGNC Symbol;Acc:HGNC:4784]	-2.59672	-0.860356	2.8986e-05	0.000234491	Down-regulated
ENSG00000228363	0	novel transcript	-3.14098	-1.45247	2.89933e-05	0.000234491	Down-regulated
ENSG00000260806	PAPOLA-DT	PAPOLA divergent transcript [Source:HGNC Symbol;Acc:HGNC:55380]	-1.50536	0.789845	2.92249e-05	0.000236047	Down-regulated
ENSG00000273008	CSGALNACT2-DT	CSGALNACT2 divergent transcript [Source:HGNC Symbol;Acc:HGNC:55174]	-2.03133	-0.228816	2.96335e-05	0.000238814	Down-regulated
ENSG00000131910	NR0B2	nuclear receptor subfamily 0 group B member 2 [Source:HGNC Symbol;Acc:HGNC:7961]	1.89489	-0.205507	2.97181e-05	0.000239388	Up-regulated
ENSG00000259417	CTXND1	cortexin domain containing 1 [Source:HGNC Symbol;Acc:HGNC:50507]	1.04266	2.61698	2.97687e-05	0.000239476	Up-regulated
ENSG00000064300	NGFR	nerve growth factor receptor [Source:HGNC Symbol;Acc:HGNC:7809]	-1.50739	0.49436	3.02338e-05	0.00024185	Down-regulated
ENSG00000203804	ADAMTSL4-AS1	ADAMTSL4 antisense RNA 1 [Source:HGNC Symbol;Acc:HGNC:32041]	-3.01226	-0.979843	3.12111e-05	0.000248752	Down-regulated
ENSG00000254219	0	novel transcript	-3.3816	-2.16858	3.1276e-05	0.000249159	Down-regulated
ENSG00000252759	Y_RNA	Y RNA [Source:RFAM;Acc:RF00019]	-2.82999	-1.7224	3.15418e-05	0.000250613	Down-regulated
ENSG00000111490	TBC1D30	TBC1 domain family member 30 [Source:HGNC Symbol;Acc:HGNC:29164]	1.65655	1.88129	3.16784e-05	0.000251275	Up-regulated
ENSG00000225313	0	novel transcript	-3.73019	-2.18254	3.20523e-05	0.00025366	Down-regulated
ENSG00000232810	TNF	tumor necrosis factor [Source:HGNC Symbol;Acc:HGNC:11892]	-2.6776	-2.07577	3.22989e-05	0.00025517	Down-regulated
ENSG00000249459	ZNF286B	zinc finger protein 286B (pseudogene) [Source:HGNC Symbol;Acc:HGNC:33241]	-1.33078	0.825114	3.23627e-05	0.000255562	Down-regulated
ENSG00000247735	KCTD13-DT	KCTD13 divergent transcript [Source:HGNC Symbol;Acc:HGNC:55585]	-1.03575	2.09106	3.29046e-05	0.000259049	Down-regulated
ENSG00000233680	HNRNPA1P27	heterogeneous nuclear ribonucleoprotein A1 pseudogene 27 [Source:HGNC Symbol;Acc:HGNC:39545]	1.26865	0.545899	3.33779e-05	0.000262203	Up-regulated
ENSG00000172543	CTSW	cathepsin W [Source:HGNC Symbol;Acc:HGNC:2546]	-2.67327	-0.829364	3.38961e-05	0.000265581	Down-regulated
ENSG00000217648	0	pseudogene similar to presenilin associated, rhomboid-like PARL	1.88614	1.06414	3.39309e-05	0.000265738	Up-regulated
ENSG00000102174	PHEX	phosphate regulating endopeptidase homolog X-linked [Source:HGNC Symbol;Acc:HGNC:8918]	1.84279	2.07758	3.40207e-05	0.000266326	Up-regulated
ENSG00000105875	WDR91	WD repeat domain 91 [Source:HGNC Symbol;Acc:HGNC:24997]	-1.17001	2.51001	3.4236e-05	0.000267432	Down-regulated
ENSG00000251168	0	novel transcript	-3.51852	-2.08914	3.43593e-05	0.000268271	Down-regulated
ENSG00000158022	TRIM63	tripartite motif containing 63 [Source:HGNC Symbol;Acc:HGNC:16007]	1.11853	1.69261	3.47332e-05	0.00027073	Up-regulated
ENSG00000246863	GPR176-DT	GPR176 divergent transcript [Source:HGNC Symbol;Acc:HGNC:54389]	-2.2368	-0.488682	3.49546e-05	0.000272104	Down-regulated
ENSG00000229399	0	prefoldin 5 (PFDN5) pseudogene	-3.58539	-1.75036	3.55969e-05	0.000276033	Down-regulated
ENSG00000257761	0	novel transcript, antisense to LGR5	-2.73522	-1.37665	3.6934e-05	0.000284811	Down-regulated
ENSG00000288752	0	novel transcript, antisense to RPL30	-1.17101	2.17413	3.71985e-05	0.000286118	Down-regulated
ENSG00000228889	UBAC2-AS1	UBAC2 antisense RNA 1 [Source:HGNC Symbol;Acc:HGNC:42502]	-1.02986	2.0107	3.72401e-05	0.000286316	Down-regulated
ENSG00000288755	0	novel transcript	-2.88922	-1.30956	3.74648e-05	0.000286944	Down-regulated
ENSG00000108551	RASD1	ras related dexamethasone induced 1 [Source:HGNC Symbol;Acc:HGNC:15828]	-1.66073	0.865854	3.76669e-05	0.000288003	Down-regulated
ENSG00000143217	NECTIN4	nectin cell adhesion molecule 4 [Source:HGNC Symbol;Acc:HGNC:19688]	-1.52716	1.30341	3.78112e-05	0.000288862	Down-regulated
ENSG00000288906	0	novel transcript	-1.76076	0.80839	3.79198e-05	0.000289569	Down-regulated
ENSG00000260589	STAM-DT	STAM divergent transcript [Source:HGNC Symbol;Acc:HGNC:49568]	-1.66422	2.3125	3.79397e-05	0.000289599	Down-regulated
ENSG00000176641	RNF152	ring finger protein 152 [Source:HGNC Symbol;Acc:HGNC:26811]	1.00276	2.0043	3.84148e-05	0.000292237	Up-regulated
ENSG00000236754	0	novel transcript	-3.16035	-1.38566	3.85642e-05	0.000293003	Down-regulated
ENSG00000125657	TNFSF9	TNF superfamily member 9 [Source:HGNC Symbol;Acc:HGNC:11939]	-1.11041	1.12357	3.93831e-05	0.000297972	Down-regulated
ENSG00000274528	0	novel transcript	-1.88099	0.973713	4.0348e-05	0.000303619	Down-regulated
ENSG00000088340	FER1L4	fer-1 like family member 4 (pseudogene) [Source:HGNC Symbol;Acc:HGNC:15801]	-1.3261	5.39541	4.09505e-05	0.000307384	Down-regulated
ENSG00000263412	NFE2L1-DT	NFE2L1 divergent transcript [Source:HGNC Symbol;Acc:HGNC:54812]	-1.70697	2.72284	4.09778e-05	0.000307461	Down-regulated
ENSG00000279608	0	TEC	-1.94492	-0.756824	4.12537e-05	0.00030889	Down-regulated
ENSG00000170006	TMEM154	transmembrane protein 154 [Source:HGNC Symbol;Acc:HGNC:26489]	-1.29299	1.77565	4.13819e-05	0.000309593	Down-regulated
ENSG00000159885	ZNF222	zinc finger protein 222 [Source:HGNC Symbol;Acc:HGNC:13015]	-1.02899	2.88819	4.14324e-05	0.000309843	Down-regulated
ENSG00000143127	ITGA10	integrin subunit alpha 10 [Source:HGNC Symbol;Acc:HGNC:6135]	-2.07523	-1.08588	4.16927e-05	0.000311531	Down-regulated
ENSG00000132522	GPS2	G protein pathway suppressor 2 [Source:HGNC Symbol;Acc:HGNC:4550]	-1.19774	2.19096	4.18716e-05	0.000312609	Down-regulated
ENSG00000257878	0	novel transcript, antisense to LTA4H	1.60255	1.43896	4.22869e-05	0.000314928	Up-regulated
ENSG00000179528	LBX2	ladybird homeobox 2 [Source:HGNC Symbol;Acc:HGNC:15525]	-1.45019	1.664	4.23259e-05	0.000315089	Down-regulated
ENSG00000100628	ASB2	ankyrin repeat and SOCS box containing 2 [Source:HGNC Symbol;Acc:HGNC:16012]	-3.31518	-2.18548	4.25538e-05	0.000316073	Down-regulated
ENSG00000159403	C1R	complement C1r [Source:HGNC Symbol;Acc:HGNC:1246]	-1.051	2.93338	4.29153e-05	0.000318165	Down-regulated
ENSG00000239911	PRKAG2-AS1	PRKAG2 antisense RNA 1 [Source:HGNC Symbol;Acc:HGNC:40468]	1.02929	1.31439	4.30822e-05	0.000319009	Up-regulated
ENSG00000171246	NPTX1	neuronal pentraxin 1 [Source:HGNC Symbol;Acc:HGNC:7952]	-2.65763	-1.03962	4.33564e-05	0.000320646	Down-regulated
ENSG00000179431	FJX1	four-jointed box kinase 1 [Source:HGNC Symbol;Acc:HGNC:17166]	-1.40964	0.329391	4.36016e-05	0.000322232	Down-regulated
ENSG00000279762	0	novel transcript, antisense to PSMD11	-3.69396	-2.19624	4.36899e-05	0.000322452	Down-regulated
ENSG00000267905	VSIG10L-AS1	VSIG10L antisense RNA 1 [Source:HGNC Symbol;Acc:HGNC:55282]	-1.14204	0.350704	4.39708e-05	0.000324127	Down-regulated
ENSG00000006747	SCIN	scinderin [Source:HGNC Symbol;Acc:HGNC:21695]	1.55034	2.29723	4.42549e-05	0.000325823	Up-regulated
ENSG00000234912	SNHG20	small nucleolar RNA host gene 20 [Source:HGNC Symbol;Acc:HGNC:33099]	-1.14118	2.93923	4.45578e-05	0.000327669	Down-regulated
ENSG00000106560	GIMAP2	GTPase, IMAP family member 2 [Source:HGNC Symbol;Acc:HGNC:21789]	1.49334	0.818626	4.4629e-05	0.000327908	Up-regulated
ENSG00000176472	ZNF575	zinc finger protein 575 [Source:HGNC Symbol;Acc:HGNC:27606]	1.00289	2.91089	4.5204e-05	0.000331191	Up-regulated
ENSG00000161944	ASGR2	asialoglycoprotein receptor 2 [Source:HGNC Symbol;Acc:HGNC:743]	1.01151	2.45014	4.64798e-05	0.000338751	Up-regulated
ENSG00000077463	SIRT6	sirtuin 6 [Source:HGNC Symbol;Acc:HGNC:14934]	-1.2018	3.03804	4.67813e-05	0.000340461	Down-regulated
ENSG00000117016	RIMS3	regulating synaptic membrane exocytosis 3 [Source:HGNC Symbol;Acc:HGNC:21292]	1.08456	1.47977	4.69639e-05	0.000341223	Up-regulated
ENSG00000234222	LIX1L-AS1	LIX1L antisense RNA 1 [Source:HGNC Symbol;Acc:HGNC:41210]	-1.80129	-0.319497	4.71423e-05	0.000342005	Down-regulated
ENSG00000181418	DDN	dendrin [Source:HGNC Symbol;Acc:HGNC:24458]	-1.02868	2.55928	4.71535e-05	0.000342005	Down-regulated
ENSG00000261338	0	novel transcript, overlapping to ARPC2 and GPBAR1	-1.14783	0.986408	4.73579e-05	0.000343074	Down-regulated
ENSG00000168490	PHYHIP	phytanoyl-CoA 2-hydroxylase interacting protein [Source:HGNC Symbol;Acc:HGNC:16865]	-2.83479	-1.4963	4.74009e-05	0.000343248	Down-regulated
ENSG00000161912	ADCY10P1	ADCY10 pseudogene 1 [Source:HGNC Symbol;Acc:HGNC:44143]	-1.28429	1.59355	4.7475e-05	0.000343647	Down-regulated
ENSG00000203761	MSTO2P	misato family member 2, pseudogene [Source:HGNC Symbol;Acc:HGNC:26329]	-1.10479	2.11359	4.86931e-05	0.000351218	Down-regulated
ENSG00000237605	DYRK3-AS1	DYRK3 antisense RNA 1 [Source:HGNC Symbol;Acc:HGNC:40199]	-4.02155	-2.56329	4.8696e-05	0.000351218	Down-regulated
ENSG00000184678	H2BC21	H2B clustered histone 21 [Source:HGNC Symbol;Acc:HGNC:4760]	-1.38567	4.17602	4.90209e-05	0.000352576	Down-regulated
ENSG00000273175	0	novel transcript	-2.16219	-0.824543	4.91626e-05	0.000353314	Down-regulated
ENSG00000261118	0	novel transcript, antisense to SPG7	-1.42361	0.789556	4.9387e-05	0.000354222	Down-regulated
ENSG00000107864	CPEB3	cytoplasmic polyadenylation element binding protein 3 [Source:HGNC Symbol;Acc:HGNC:21746]	1.7146	1.71437	4.9673e-05	0.00035599	Up-regulated
ENSG00000177576	C18orf32	chromosome 18 open reading frame 32 [Source:HGNC Symbol;Acc:HGNC:31690]	-1.10581	2.33541	4.96997e-05	0.00035604	Down-regulated
ENSG00000272217	0	novel transcript	-1.65773	0.659241	5.04912e-05	0.000360423	Down-regulated
ENSG00000261187	0	novel transcript	-1.63686	-0.531845	5.06801e-05	0.000361058	Down-regulated
ENSG00000138185	ENTPD1	ectonucleoside triphosphate diphosphohydrolase 1 [Source:HGNC Symbol;Acc:HGNC:3363]	1.14777	2.57687	5.10791e-05	0.000363471	Up-regulated
ENSG00000184937	WT1	WT1 transcription factor [Source:HGNC Symbol;Acc:HGNC:12796]	1.12506	1.46446	5.13285e-05	0.000364814	Up-regulated
ENSG00000261485	PAN3-AS1	PAN3 antisense RNA 1 [Source:HGNC Symbol;Acc:HGNC:39932]	-1.30417	2.31799	5.1658e-05	0.000366579	Down-regulated
ENSG00000200795	RNU4-1	RNA, U4 small nuclear 1 [Source:HGNC Symbol;Acc:HGNC:10192]	-1.7473	-0.736037	5.29423e-05	0.000374515	Down-regulated
ENSG00000275329	0	novel transcript	-1.73637	-0.0710696	5.30116e-05	0.000374859	Down-regulated
ENSG00000267024	0	novel transcript, antisense to PDCD2	-2.64557	-2.11446	5.32747e-05	0.000376277	Down-regulated
ENSG00000103723	AP3B2	adaptor related protein complex 3 subunit beta 2 [Source:HGNC Symbol;Acc:HGNC:567]	-2.41379	-1.78796	5.42268e-05	0.00038062	Down-regulated
ENSG00000222043	0	novel transcript	-1.17669	0.130581	5.44041e-05	0.000381568	Down-regulated
ENSG00000271882	0	novel transcript	-2.38756	-0.607564	5.47465e-05	0.000383672	Down-regulated
ENSG00000113448	PDE4D	phosphodiesterase 4D [Source:HGNC Symbol;Acc:HGNC:8783]	-1.06026	4.16555	5.48852e-05	0.000384345	Down-regulated
ENSG00000272799	0	novel transcript	-2.05902	-0.247382	5.50127e-05	0.000385089	Down-regulated
ENSG00000128849	CGNL1	cingulin like 1 [Source:HGNC Symbol;Acc:HGNC:25931]	1.17369	3.45102	5.50581e-05	0.000385161	Up-regulated
ENSG00000224699	LAMTOR5-AS1	LAMTOR5 antisense RNA 1 [Source:HGNC Symbol;Acc:HGNC:40823]	-1.08608	1.3839	5.60226e-05	0.000390494	Down-regulated
ENSG00000270083	0	novel transcript, sense intronic to NDUFA6	-1.83549	-0.0521791	5.61382e-05	0.000390997	Down-regulated
ENSG00000288880	0	novel transcript	-1.24337	1.09973	5.67577e-05	0.00039516	Down-regulated
ENSG00000103310	ZP2	zona pellucida glycoprotein 2 [Source:HGNC Symbol;Acc:HGNC:13188]	1.15378	2.88473	5.79235e-05	0.000401419	Up-regulated
ENSG00000100767	PAPLN	papilin, proteoglycan like sulfated glycoprotein [Source:HGNC Symbol;Acc:HGNC:19262]	1.3736	2.62207	5.81774e-05	0.000402715	Up-regulated
ENSG00000164879	CA3	carbonic anhydrase 3 [Source:HGNC Symbol;Acc:HGNC:1374]	1.16599	1.8412	5.84623e-05	0.000404222	Up-regulated
ENSG00000224934	0	novel transcript	-1.20286	3.07069	5.85707e-05	0.000404817	Down-regulated
ENSG00000104998	IL27RA	interleukin 27 receptor subunit alpha [Source:HGNC Symbol;Acc:HGNC:17290]	1.11834	2.08864	5.89215e-05	0.00040675	Up-regulated
ENSG00000203814	H2BC18	H2B clustered histone 18 [Source:HGNC Symbol;Acc:HGNC:24700]	-2.20813	-0.931122	5.98228e-05	0.000412524	Down-regulated
ENSG00000261654	0	novel transcript, sense overlapping C1orf103	-1.60692	-0.498186	6.10008e-05	0.000418729	Down-regulated
ENSG00000150764	DIXDC1	DIX domain containing 1 [Source:HGNC Symbol;Acc:HGNC:23695]	-1.17642	2.02202	6.14056e-05	0.000421187	Down-regulated
ENSG00000287809	0	novel transcript	-2.6663	-1.64936	6.15764e-05	0.000422038	Down-regulated
ENSG00000134780	DAGLA	diacylglycerol lipase alpha [Source:HGNC Symbol;Acc:HGNC:1165]	1.08124	2.5466	6.18165e-05	0.000423239	Up-regulated
ENSG00000254551	0	novel transcript	-2.18289	-1.38667	6.34353e-05	0.00043224	Down-regulated
ENSG00000260285	0	novel transcript, antisense to TRMT61A	-1.31548	1.84477	6.41489e-05	0.000436674	Down-regulated
ENSG00000272735	0	novel transcript	-2.1546	-0.196999	6.56016e-05	0.000444231	Down-regulated
ENSG00000120049	KCNIP2	potassium voltage-gated channel interacting protein 2 [Source:HGNC Symbol;Acc:HGNC:15522]	1.08045	3.21076	6.5762e-05	0.000444817	Up-regulated
ENSG00000273437	0	novel transcript	-1.99627	0.539345	6.65404e-05	0.000448905	Down-regulated
ENSG00000132744	ACY3	aminoacylase 3 [Source:HGNC Symbol;Acc:HGNC:24104]	1.28865	2.38656	6.69472e-05	0.000451312	Up-regulated
ENSG00000129993	CBFA2T3	CBFA2/RUNX1 partner transcriptional co-repressor 3 [Source:HGNC Symbol;Acc:HGNC:1537]	1.17238	1.18838	6.75367e-05	0.00045434	Up-regulated
ENSG00000275457	0	novel transcript, antisense to XRN2	-1.91655	-0.654319	6.77219e-05	0.000455345	Down-regulated
ENSG00000139292	LGR5	leucine rich repeat containing G protein-coupled receptor 5 [Source:HGNC Symbol;Acc:HGNC:4504]	-1.51945	1.24754	6.87934e-05	0.000461519	Down-regulated
ENSG00000289155	0	novel transcript	-1.35775	0.812829	6.91476e-05	0.000463379	Down-regulated
ENSG00000232934	0	novel transcript, antisense to ACSL5	-1.96878	-0.0934145	6.97115e-05	0.000466689	Down-regulated
ENSG00000113361	CDH6	cadherin 6 [Source:HGNC Symbol;Acc:HGNC:1765]	2.67243	2.07941	6.97443e-05	0.000466689	Up-regulated
ENSG00000229337	0	novel transcript	-1.41231	0.673904	7.00272e-05	0.000468057	Down-regulated
ENSG00000265345	MIR5188	microRNA 5188 [Source:HGNC Symbol;Acc:HGNC:43502]	-1.89977	-0.563422	7.06199e-05	0.000471496	Down-regulated
ENSG00000272148	0	novel transcript, antisense to AGBL5	-1.63372	0.732703	7.09205e-05	0.000473328	Down-regulated
ENSG00000185507	IRF7	interferon regulatory factor 7 [Source:HGNC Symbol;Acc:HGNC:6122]	-1.20881	2.38483	7.1327e-05	0.000475273	Down-regulated
ENSG00000108106	UBE2S	ubiquitin conjugating enzyme E2 S [Source:HGNC Symbol;Acc:HGNC:17895]	-1.18089	1.35177	7.14525e-05	0.000475297	Down-regulated
ENSG00000135046	ANXA1	annexin A1 [Source:HGNC Symbol;Acc:HGNC:533]	-1.19897	4.47737	7.19181e-05	0.000477515	Down-regulated
ENSG00000260259	LINC02166	long intergenic non-protein coding RNA 2166 [Source:HGNC Symbol;Acc:HGNC:53027]	-1.15905	1.08143	7.21293e-05	0.00047839	Down-regulated
ENSG00000226314	ZKSCAN8P1	ZKSCAN8 pseudogene 1 [Source:HGNC Symbol;Acc:HGNC:18777]	-1.66195	0.0259044	7.23955e-05	0.000479803	Down-regulated
ENSG00000155093	PTPRN2	protein tyrosine phosphatase receptor type N2 [Source:HGNC Symbol;Acc:HGNC:9677]	-1.50986	1.27358	7.24345e-05	0.000479885	Down-regulated
ENSG00000224945	0	novel transcript	1.38273	1.57969	7.29911e-05	0.000482688	Up-regulated
ENSG00000289523	0	novel transcript, sense intronic to MAPK1IP1L	-1.44013	0.194235	7.32204e-05	0.000483849	Down-regulated
ENSG00000188483	IER5L	immediate early response 5 like [Source:HGNC Symbol;Acc:HGNC:23679]	-1.17206	0.446662	7.34766e-05	0.000485365	Down-regulated
ENSG00000172965	MIR4435-2HG	MIR4435-2 host gene [Source:HGNC Symbol;Acc:HGNC:35163]	-1.56075	0.475121	7.53579e-05	0.000495798	Down-regulated
ENSG00000272338	0	novel transcript	1.50012	1.23969	7.65635e-05	0.000502813	Up-regulated
ENSG00000167588	GPD1	glycerol-3-phosphate dehydrogenase 1 [Source:HGNC Symbol;Acc:HGNC:4455]	1.07575	5.98973	7.66466e-05	0.000502993	Up-regulated
ENSG00000184005	ST6GALNAC3	ST6 N-acetylgalactosaminide alpha-2,6-sialyltransferase 3 [Source:HGNC Symbol;Acc:HGNC:19343]	1.45875	4.4171	7.68611e-05	0.000504218	Up-regulated
ENSG00000265287	0	novel transcript, antisense to novel protein	-2.82894	-1.4871	7.71748e-05	0.000505541	Down-regulated
ENSG00000226125	LINC01907	long intergenic non-protein coding RNA 1907 [Source:HGNC Symbol;Acc:HGNC:52726]	-1.40797	-0.180312	7.79778e-05	0.000509876	Down-regulated
ENSG00000233718	MYCNOS	MYCN opposite strand [Source:HGNC Symbol;Acc:HGNC:16911]	-1.88419	-0.883856	7.86196e-05	0.000513144	Down-regulated
ENSG00000227543	SPAG5-AS1	SPAG5 antisense RNA 1 [Source:HGNC Symbol;Acc:HGNC:41140]	-1.08242	2.077	7.87457e-05	0.000513782	Down-regulated
ENSG00000288988	0	novel transcript, antisense to DOCK3	-1.52367	0.854934	7.87982e-05	0.000513939	Down-regulated
ENSG00000286403	0	novel transcript	-1.79741	-0.468983	7.8988e-05	0.000514805	Down-regulated
ENSG00000125850	OVOL2	ovo like zinc finger 2 [Source:HGNC Symbol;Acc:HGNC:15804]	1.05359	1.67112	7.94682e-05	0.00051756	Up-regulated
ENSG00000124103	FAM209A	family with sequence similarity 209 member A [Source:HGNC Symbol;Acc:HGNC:16100]	-1.54656	0.559608	7.95274e-05	0.000517759	Down-regulated
ENSG00000175352	NRIP3	nuclear receptor interacting protein 3 [Source:HGNC Symbol;Acc:HGNC:1167]	-1.39801	0.754592	8.09128e-05	0.000525453	Down-regulated
ENSG00000082497	SERTAD4	SERTA domain containing 4 [Source:HGNC Symbol;Acc:HGNC:25236]	-2.24289	-1.02916	8.14081e-05	0.000527721	Down-regulated
ENSG00000167967	E4F1	E4F transcription factor 1 [Source:HGNC Symbol;Acc:HGNC:3121]	-1.11762	3.25871	8.15377e-05	0.000528182	Down-regulated
ENSG00000141905	NFIC	nuclear factor I C [Source:HGNC Symbol;Acc:HGNC:7786]	1.53892	1.50103	8.27387e-05	0.000534811	Up-regulated
ENSG00000263823	0	novel transcript, antisense to KIAA1012	-1.84341	-0.128754	8.34399e-05	0.000538187	Down-regulated
ENSG00000101222	SPEF1	sperm flagellar 1 [Source:HGNC Symbol;Acc:HGNC:15874]	-2.67351	-1.82521	8.36827e-05	0.000539561	Down-regulated
ENSG00000234498	RPL13AP20	ribosomal protein L13a pseudogene 20 [Source:HGNC Symbol;Acc:HGNC:35709]	-1.46518	-0.157545	8.41702e-05	0.000541971	Down-regulated
ENSG00000178502	KLHL11	kelch like family member 11 [Source:HGNC Symbol;Acc:HGNC:19008]	-1.46529	3.29786	8.41766e-05	0.000541971	Down-regulated
ENSG00000236483	MTND2P40	MT-ND2 pseudogene 40 [Source:HGNC Symbol;Acc:HGNC:52084]	-3.83698	-2.36234	8.45293e-05	0.000543812	Down-regulated
ENSG00000221949	LINC01465	long intergenic non-protein coding RNA 1465 [Source:HGNC Symbol;Acc:HGNC:26364]	-1.30932	0.00714408	8.45528e-05	0.000543812	Down-regulated
ENSG00000213339	QTRT1	queuine tRNA-ribosyltransferase catalytic subunit 1 [Source:HGNC Symbol;Acc:HGNC:23797]	-1.21553	2.06601	8.49136e-05	0.000545938	Down-regulated
ENSG00000233220	LINC00167	long intergenic non-protein coding RNA 167 [Source:HGNC Symbol;Acc:HGNC:30468]	-1.71262	-0.661615	8.53432e-05	0.000547919	Down-regulated
ENSG00000158859	ADAMTS4	ADAM metallopeptidase with thrombospondin type 1 motif 4 [Source:HGNC Symbol;Acc:HGNC:220]	-2.18575	-1.21759	8.54256e-05	0.000548254	Down-regulated
ENSG00000283525	0	phospholipase A2 inhibitor and LY6/PLAUR domain containing (PINLYP) pseudogene	-2.47241	-1.32208	8.76215e-05	0.000559761	Down-regulated
ENSG00000286482	0	novel transcript	-1.34735	1.91955	8.8251e-05	0.000563384	Down-regulated
ENSG00000287576	0	novel transcript	-1.50016	0.515129	8.95759e-05	0.000570431	Down-regulated
ENSG00000240591	0	novel transcript	-1.65201	-1.06219	8.96095e-05	0.000570443	Down-regulated
ENSG00000272235	0	novel transcript	-1.61628	-1.14624	9.04542e-05	0.000574808	Down-regulated
ENSG00000274859	0	novel transcript, antisense to VSIG10	-1.88193	-0.231854	9.09526e-05	0.000577568	Down-regulated
ENSG00000281501	SEPSECS-AS1	SEPSECS antisense RNA 1 (head to head) [Source:HGNC Symbol;Acc:HGNC:27737]	1.13964	1.72194	9.10361e-05	0.000577895	Up-regulated
ENSG00000162771	FAM71A	family with sequence similarity 71 member A [Source:HGNC Symbol;Acc:HGNC:26541]	-2.84403	-1.13867	9.12941e-05	0.000578923	Down-regulated
ENSG00000289017	0	novel transcript, sense intronic to RP11-437B10.1and CHD2	-3.75202	-1.13963	9.13923e-05	0.000579342	Down-regulated
ENSG00000184697	CLDN6	claudin 6 [Source:HGNC Symbol;Acc:HGNC:2048]	-1.10936	4.24609	9.20824e-05	0.000583103	Down-regulated
ENSG00000250325	IGBP1P4	immunoglobulin (CD79A) binding protein 1 pseudogene 4 [Source:HGNC Symbol;Acc:HGNC:43613]	-2.17094	-1.36892	9.2847e-05	0.000587532	Down-regulated
ENSG00000283050	GTF2IP12	general transcription factor IIi pseudogene 12 [Source:HGNC Symbol;Acc:HGNC:51723]	-1.00289	2.18014	9.30235e-05	0.000588443	Down-regulated
ENSG00000276278	0	novel transcript, antisense to ZSCAN2	-1.03709	1.59175	9.3917e-05	0.000592217	Down-regulated
ENSG00000154277	UCHL1	ubiquitin C-terminal hydrolase L1 [Source:HGNC Symbol;Acc:HGNC:12513]	-1.30095	1.53403	9.52361e-05	0.000599162	Down-regulated
ENSG00000278677	H2AC17	H2A clustered histone 17 [Source:HGNC Symbol;Acc:HGNC:4735]	-3.75727	-2.32979	9.55363e-05	0.000600761	Down-regulated
ENSG00000131746	TNS4	tensin 4 [Source:HGNC Symbol;Acc:HGNC:24352]	-2.28033	-1.24834	9.67468e-05	0.000607105	Down-regulated
ENSG00000264119	MIR4795	microRNA 4795 [Source:HGNC Symbol;Acc:HGNC:41757]	-2.67018	-1.96457	9.70422e-05	0.000608535	Down-regulated
ENSG00000254363	0	novel transcript	1.05053	2.30821	9.72375e-05	0.000609036	Up-regulated
ENSG00000116882	HAO2	hydroxyacid oxidase 2 [Source:HGNC Symbol;Acc:HGNC:4810]	3.31816	0.243377	9.72569e-05	0.000609036	Up-regulated
ENSG00000270022	0	RNA, U12 small nuclear	-2.84494	-1.91651	9.80212e-05	0.000613397	Down-regulated
ENSG00000264107	MIR4733HG	MIR4733 host gene [Source:HGNC Symbol;Acc:HGNC:55332]	-1.66611	0.397072	9.87929e-05	0.000617584	Down-regulated
ENSG00000116260	QSOX1	quiescin sulfhydryl oxidase 1 [Source:HGNC Symbol;Acc:HGNC:9756]	-1.00928	2.44139	9.89773e-05	0.000618523	Down-regulated
ENSG00000147873	IFNA5	interferon alpha 5 [Source:HGNC Symbol;Acc:HGNC:5426]	-2.92892	-2.19663	9.92493e-05	0.000620008	Down-regulated
ENSG00000213906	LTB4R2	leukotriene B4 receptor 2 [Source:HGNC Symbol;Acc:HGNC:19260]	-1.32599	2.65452	9.96791e-05	0.000621832	Down-regulated
ENSG00000131482	G6PC1	glucose-6-phosphatase catalytic subunit 1 [Source:HGNC Symbol;Acc:HGNC:4056]	1.5166	2.93766	0.000100054	0.000623359	Up-regulated
ENSG00000241770	0	novel transcript	-3.81171	-2.17685	0.000100062	0.000623359	Down-regulated
ENSG00000114948	ADAM23	ADAM metallopeptidase domain 23 [Source:HGNC Symbol;Acc:HGNC:202]	1.65148	3.88083	0.000101044	0.000628394	Up-regulated
ENSG00000185527	PDE6G	phosphodiesterase 6G [Source:HGNC Symbol;Acc:HGNC:8789]	-2.56265	-1.14917	0.000102828	0.000637732	Down-regulated
ENSG00000078114	NEBL	nebulette [Source:HGNC Symbol;Acc:HGNC:16932]	-1.30268	2.10192	0.000103225	0.00063942	Down-regulated
ENSG00000260884	0	novel transcript	-4.78482	-2.5645	0.000103743	0.000641862	Down-regulated
ENSG00000286230	0	novel transcript	-1.59409	-0.058602	0.00010386	0.000642146	Down-regulated
ENSG00000130513	GDF15	growth differentiation factor 15 [Source:HGNC Symbol;Acc:HGNC:30142]	-1.04275	1.7995	0.000105264	0.000648797	Down-regulated
ENSG00000147174	GCNA	germ cell nuclear acidic peptidase [Source:HGNC Symbol;Acc:HGNC:15805]	-1.08091	1.59787	0.000105439	0.000648797	Down-regulated
ENSG00000279019	0	TEC	-2.23493	-0.937334	0.0001065	0.000653994	Down-regulated
ENSG00000236263	0	novel transcript	-1.60562	-0.402902	0.000107441	0.000658423	Down-regulated
ENSG00000235044	PPIAP3	peptidylprolyl isomerase A pseudogene 3 [Source:HGNC Symbol;Acc:HGNC:16545]	-2.3741	-1.01033	0.000107477	0.000658423	Down-regulated
ENSG00000097021	ACOT7	acyl-CoA thioesterase 7 [Source:HGNC Symbol;Acc:HGNC:24157]	1.22406	4.72312	0.000107666	0.000659137	Up-regulated
ENSG00000273064	0	novel transcript	-1.40951	-0.240951	0.000107891	0.000659996	Down-regulated
ENSG00000273599	0	novel transcript, antisense to CTBP2	-1.7506	0.624016	0.000107916	0.000659996	Down-regulated
ENSG00000260742	ITPRID2-DT	ITPRID2 divergent transcript [Source:HGNC Symbol;Acc:HGNC:55386]	-1.45739	0.997411	0.000108643	0.000663195	Down-regulated
ENSG00000041982	TNC	tenascin C [Source:HGNC Symbol;Acc:HGNC:5318]	-1.03943	2.59734	0.000108782	0.000663718	Down-regulated
ENSG00000289334	0	novel transcript	-1.94726	0.314811	0.000111034	0.00067563	Down-regulated
ENSG00000284640	0	novel transcript	-2.8998	-1.98732	0.000111981	0.000679792	Down-regulated
ENSG00000279693	0	novel transcript	1.0359	2.58866	0.000112494	0.000682446	Up-regulated
ENSG00000269176	0	novel transcript, antisense to TAF6L	-1.1972	0.710559	0.000112846	0.00068435	Down-regulated
ENSG00000213013	RPS15AP36	ribosomal protein S15a pseudogene 36 [Source:HGNC Symbol;Acc:HGNC:36803]	-1.66683	-0.441371	0.000113134	0.000685868	Down-regulated
ENSG00000258725	PRC1-AS1	PRC1 antisense RNA 1 [Source:HGNC Symbol;Acc:HGNC:48587]	-1.26084	0.931141	0.000113318	0.000686524	Down-regulated
ENSG00000110876	SELPLG	selectin P ligand [Source:HGNC Symbol;Acc:HGNC:10722]	-2.06889	-1.31624	0.000114217	0.000691044	Down-regulated
ENSG00000100036	SLC35E4	solute carrier family 35 member E4 [Source:HGNC Symbol;Acc:HGNC:17058]	-1.1885	1.14122	0.00011464	0.000692695	Down-regulated
ENSG00000163795	ZNF513	zinc finger protein 513 [Source:HGNC Symbol;Acc:HGNC:26498]	-1.07462	4.08648	0.000116363	0.000701438	Down-regulated
ENSG00000286638	0	novel transcript	-1.73983	-0.568269	0.000116623	0.000702541	Down-regulated
ENSG00000150893	FREM2	FRAS1 related extracellular matrix 2 [Source:HGNC Symbol;Acc:HGNC:25396]	-1.05146	4.58829	0.000117072	0.00070501	Down-regulated
ENSG00000135740	SLC9A5	solute carrier family 9 member A5 [Source:HGNC Symbol;Acc:HGNC:11078]	-1.16752	1.60855	0.000117688	0.000708008	Down-regulated
ENSG00000260448	LCMT1-AS1	LCMT1 antisense RNA 1 [Source:HGNC Symbol;Acc:HGNC:51177]	-1.99036	-1.60437	0.000119319	0.000715677	Down-regulated
ENSG00000167807	0	novel transcript	-2.45984	-1.57764	0.000120521	0.00072121	Down-regulated
ENSG00000213760	ATP6V1G2	ATPase H+ transporting V1 subunit G2 [Source:HGNC Symbol;Acc:HGNC:862]	-1.75701	-1.29044	0.00012188	0.000727171	Down-regulated
ENSG00000228482	LINC01713	long intergenic non-protein coding RNA 1713 [Source:HGNC Symbol;Acc:HGNC:52500]	1.27214	0.944086	0.000122128	0.000727934	Up-regulated
ENSG00000086619	ERO1B	endoplasmic reticulum oxidoreductase 1 beta [Source:HGNC Symbol;Acc:HGNC:14355]	-1.00225	1.01708	0.000124675	0.000740423	Down-regulated
ENSG00000104826	LHB	luteinizing hormone subunit beta [Source:HGNC Symbol;Acc:HGNC:6584]	-1.16253	0.515364	0.000124833	0.000740918	Down-regulated
ENSG00000204876	0	novel transcript	-1.80875	-0.431184	0.000124896	0.000740918	Down-regulated
ENSG00000237781	ADAMTSL4-AS2	ADAMTSL4 antisense RNA 2 [Source:HGNC Symbol;Acc:HGNC:40895]	-1.83284	-0.540604	0.000125016	0.000741228	Down-regulated
ENSG00000223663	NDUFB4P8	NADH:ubiquinone oxidoreductase subunit B4 pseudogene 8 [Source:HGNC Symbol;Acc:HGNC:45256]	-2.68059	-1.85855	0.000126341	0.000746882	Down-regulated
ENSG00000286895	0	novel transcript	2.1298	0.834094	0.000127177	0.000751333	Up-regulated
ENSG00000160447	PKN3	protein kinase N3 [Source:HGNC Symbol;Acc:HGNC:17999]	-2.18158	-1.21102	0.000127616	0.000752937	Down-regulated
ENSG00000177595	PIDD1	p53-induced death domain protein 1 [Source:HGNC Symbol;Acc:HGNC:16491]	-1.32614	3.2267	0.000128172	0.000755476	Down-regulated
ENSG00000205853	RFPL3S	RFPL3 antisense [Source:HGNC Symbol;Acc:HGNC:9981]	-1.69066	-0.106213	0.000128547	0.000757192	Down-regulated
ENSG00000165794	SLC39A2	solute carrier family 39 member 2 [Source:HGNC Symbol;Acc:HGNC:17127]	1.09807	2.10129	0.000130332	0.000765806	Up-regulated
ENSG00000166670	MMP10	matrix metallopeptidase 10 [Source:HGNC Symbol;Acc:HGNC:7156]	-2.00815	-0.692596	0.000130941	0.000769038	Down-regulated
ENSG00000284922	LRTOMT	leucine rich transmembrane and O-methyltransferase domain containing [Source:HGNC Symbol;Acc:HGNC:25033]	-2.15847	-0.725282	0.000131749	0.000772857	Down-regulated
ENSG00000232860	SMG7-AS1	SMG7 antisense RNA 1 [Source:HGNC Symbol;Acc:HGNC:24518]	-1.68385	-0.567767	0.00013188	0.000773045	Down-regulated
ENSG00000137094	DNAJB5	DnaJ heat shock protein family (Hsp40) member B5 [Source:HGNC Symbol;Acc:HGNC:14887]	-1.09526	0.693404	0.000132622	0.000776637	Down-regulated
ENSG00000004660	CAMKK1	calcium/calmodulin dependent protein kinase kinase 1 [Source:HGNC Symbol;Acc:HGNC:1469]	1.01064	0.740212	0.000133861	0.000782918	Up-regulated
ENSG00000267741	UBE2L4	ubiquitin conjugating enzyme E2 L4 (pseudogene) [Source:HGNC Symbol;Acc:HGNC:12489]	-2.35089	-1.38249	0.000133868	0.000782918	Down-regulated
ENSG00000261758	STAG1-DT	STAG1 divergent transcript [Source:HGNC Symbol;Acc:HGNC:55350]	-2.10598	-0.795743	0.000136148	0.00079394	Down-regulated
ENSG00000146216	TTBK1	tau tubulin kinase 1 [Source:HGNC Symbol;Acc:HGNC:19140]	1.97123	0.663594	0.00013634	0.000794804	Up-regulated
ENSG00000272768	0	novel transcript, antisense to PURB	-2.43458	-1.4978	0.000137037	0.0007973	Down-regulated
ENSG00000082126	MPP4	membrane palmitoylated protein 4 [Source:HGNC Symbol;Acc:HGNC:13680]	-3.06443	-2.19981	0.00013821	0.000802576	Down-regulated
ENSG00000075618	FSCN1	fascin actin-bundling protein 1 [Source:HGNC Symbol;Acc:HGNC:11148]	-1.0232	0.755018	0.000138319	0.000802576	Down-regulated
ENSG00000115112	TFCP2L1	transcription factor CP2 like 1 [Source:HGNC Symbol;Acc:HGNC:17925]	-1.67256	-0.208286	0.000139175	0.000806095	Down-regulated
ENSG00000287009	0	novel transcript, antisense to ZNF518A	-1.04057	1.96215	0.000139214	0.000806095	Down-regulated
ENSG00000285601	0	novel transcript	-3.59576	-2.10009	0.000139818	0.000808553	Down-regulated
ENSG00000264443	NCMAP-DT	NCMAP divergent transcript [Source:HGNC Symbol;Acc:HGNC:54327]	1.77454	-0.115166	0.000140408	0.000811183	Up-regulated
ENSG00000217702	0	novel transcript, antisense to BOLA3	-2.10428	-0.520795	0.000140693	0.000812575	Down-regulated
ENSG00000267519	MIR23AHG	miR-23a/27a/24-2 cluster host gene [Source:HGNC Symbol;Acc:HGNC:27620]	-1.23153	2.80581	0.000142649	0.000821765	Down-regulated
ENSG00000277399	GPR179	G protein-coupled receptor 179 [Source:HGNC Symbol;Acc:HGNC:31371]	-1.79563	0.0323141	0.000143346	0.000825521	Down-regulated
ENSG00000280080	TBC1D22A-AS1	TBC1D22A antisense RNA 1 [Source:HGNC Symbol;Acc:HGNC:51221]	-3.2464	-2.23889	0.000143843	0.000827592	Down-regulated
ENSG00000256092	SBNO1-AS1	SBNO1 antisense RNA 1 [Source:HGNC Symbol;Acc:HGNC:54355]	-1.50622	0.490868	0.000144054	0.000828154	Down-regulated
ENSG00000279006	0	novel transcript	-3.38698	-2.42392	0.000144502	0.000829726	Down-regulated
ENSG00000241933	DENND6A-DT	DENND6A divergent transcript [Source:HGNC Symbol;Acc:HGNC:51592]	-1.8353	-0.326611	0.000144536	0.000829726	Down-regulated
ENSG00000137766	UNC13C	unc-13 homolog C [Source:HGNC Symbol;Acc:HGNC:23149]	1.48782	3.37522	0.000144999	0.00083208	Up-regulated
ENSG00000273017	0	novel transcript, sense intronic BACH1	-2.20286	-1.89284	0.000145219	0.000832851	Down-regulated
ENSG00000113303	BTNL8	butyrophilin like 8 [Source:HGNC Symbol;Acc:HGNC:26131]	1.27406	6.05898	0.000147468	0.000843991	Up-regulated
ENSG00000244165	P2RY11	purinergic receptor P2Y11 [Source:HGNC Symbol;Acc:HGNC:8540]	-1.09921	1.88619	0.000147854	0.000845139	Down-regulated
ENSG00000279584	0	TEC	-2.45891	-1.84878	0.000147876	0.000845139	Down-regulated
ENSG00000066629	EML1	EMAP like 1 [Source:HGNC Symbol;Acc:HGNC:3330]	1.77571	1.89819	0.000148162	0.000846503	Up-regulated
ENSG00000289303	0	novel transcript	-2.13335	-0.686624	0.000148313	0.0008471	Down-regulated
ENSG00000279901	0	tec	-2.62555	-1.76355	0.000149971	0.000855048	Down-regulated
ENSG00000171649	ZIK1	zinc finger protein interacting with K protein 1 [Source:HGNC Symbol;Acc:HGNC:33104]	-2.14503	-1.40332	0.000155874	0.000883302	Down-regulated
ENSG00000211452	DIO1	iodothyronine deiodinase 1 [Source:HGNC Symbol;Acc:HGNC:2883]	1.29372	3.00235	0.000155953	0.000883475	Up-regulated
ENSG00000271784	TP53RK-DT	TP53RK divergent transcript [Source:HGNC Symbol;Acc:HGNC:55243]	-2.06988	-1.86195	0.000156292	0.000884841	Down-regulated
ENSG00000105290	APLP1	amyloid beta precursor like protein 1 [Source:HGNC Symbol;Acc:HGNC:597]	-1.32045	-0.283467	0.000157491	0.000890787	Down-regulated
ENSG00000243384	0	novel transcript	1.48815	0.503725	0.000161138	0.00090772	Up-regulated
ENSG00000289119	0	novel transcript	-2.96106	-1.74519	0.000161294	0.000908315	Down-regulated
ENSG00000185176	AQP12B	aquaporin 12B [Source:HGNC Symbol;Acc:HGNC:6096]	1.23036	1.60047	0.000162843	0.000914475	Up-regulated
ENSG00000101353	MROH8	maestro heat like repeat family member 8 [Source:HGNC Symbol;Acc:HGNC:16125]	-1.60939	0.726083	0.000166281	0.000931175	Down-regulated
ENSG00000124593	0	novel protein	-1.26852	0.426148	0.000167817	0.000937447	Down-regulated
ENSG00000178665	ZNF713	zinc finger protein 713 [Source:HGNC Symbol;Acc:HGNC:22043]	1.03227	1.2767	0.000169901	0.000946164	Up-regulated
ENSG00000241316	SUCLG2-AS1	SUCLG2 antisense RNA 1 (head to head) [Source:HGNC Symbol;Acc:HGNC:49643]	1.09772	2.4376	0.000169963	0.00094622	Up-regulated
ENSG00000231424	0	novel transcript, antisense to FMO1	2.43725	-0.715569	0.000172015	0.000955874	Up-regulated
ENSG00000227777	0	ribosomal protein L7a (RPL7A) pseudogene	1.19866	1.37401	0.000177753	0.000981154	Up-regulated
ENSG00000279744	0	TEC	-1.72944	-0.288549	0.000179936	0.000991352	Down-regulated
ENSG00000224977	LINC02776	long intergenic non-protein coding RNA 2776 [Source:HGNC Symbol;Acc:HGNC:54295]	-2.06849	-0.666961	0.000180287	0.000992624	Down-regulated
ENSG00000143994	ABHD1	abhydrolase domain containing 1 [Source:HGNC Symbol;Acc:HGNC:17553]	1.10641	0.695436	0.000180329	0.000992624	Up-regulated
ENSG00000189045	ANKDD1B	ankyrin repeat and death domain containing 1B [Source:HGNC Symbol;Acc:HGNC:32525]	1.40946	0.651981	0.000180332	0.000992624	Up-regulated
ENSG00000165238	WNK2	WNK lysine deficient protein kinase 2 [Source:HGNC Symbol;Acc:HGNC:14542]	1.16263	1.73046	0.000180478	0.000993126	Up-regulated
ENSG00000284738	0	novel transcript, antisense to DENND4B	-2.24221	-1.49009	0.000181657	0.000998397	Down-regulated
ENSG00000140030	GPR65	G protein-coupled receptor 65 [Source:HGNC Symbol;Acc:HGNC:4517]	-2.77952	-1.91473	0.000182438	0.00100117	Down-regulated
ENSG00000280387	0	TEC	-1.4334	0.172918	0.000183378	0.00100541	Down-regulated
ENSG00000226002	GTF2IP14	general transcription factor IIi pseudogene 14 [Source:HGNC Symbol;Acc:HGNC:51726]	-1.24622	0.403846	0.000184101	0.00100815	Down-regulated
ENSG00000273154	0	novel protein, ZGPAT-LIME1 readthrough	-1.25212	-0.207768	0.000187086	0.00102263	Down-regulated
ENSG00000253327	RAD21-AS1	RAD21 antisense RNA 1 [Source:HGNC Symbol;Acc:HGNC:32158]	-1.29395	0.319956	0.000188024	0.00102745	Down-regulated
ENSG00000015285	WAS	WASP actin nucleation promoting factor [Source:HGNC Symbol;Acc:HGNC:12731]	-1.17384	1.3409	0.000189966	0.0010368	Down-regulated
ENSG00000282164	PEG13	paternally expressed 13 [Source:HGNC Symbol;Acc:HGNC:19969]	1.26791	0.0420576	0.000190384	0.00103846	Up-regulated
ENSG00000140093	SERPINA10	serpin family A member 10 [Source:HGNC Symbol;Acc:HGNC:15996]	1.00917	5.08574	0.000190452	0.00103851	Up-regulated
ENSG00000226386	PARD3-AS1	PARD3 antisense RNA 1 [Source:HGNC Symbol;Acc:HGNC:44964]	-1.82626	-1.37606	0.000191569	0.00104349	Down-regulated
ENSG00000238045	0	novel transcript, antisense to C16orf53 and MVP	-1.4061	-0.577256	0.000191811	0.00104403	Down-regulated
ENSG00000088053	GP6	glycoprotein VI platelet [Source:HGNC Symbol;Acc:HGNC:14388]	-1.83444	-1.29045	0.000191949	0.00104447	Down-regulated
ENSG00000289311	0	novel transcript	-1.22626	0.0110809	0.000192114	0.00104505	Down-regulated
ENSG00000255867	DENND5B-AS1	DENND5B antisense RNA 1 [Source:HGNC Symbol;Acc:HGNC:42517]	-1.81434	-0.966894	0.000192203	0.00104518	Down-regulated
ENSG00000163297	ANTXR2	ANTXR cell adhesion molecule 2 [Source:HGNC Symbol;Acc:HGNC:21732]	1.12475	2.44573	0.000192676	0.00104716	Up-regulated
ENSG00000231256	CFAP97D1	CFAP97 domain containing 1 [Source:HGNC Symbol;Acc:HGNC:37241]	-1.77731	-1.18744	0.000193773	0.00105281	Down-regulated
ENSG00000167895	TMC8	transmembrane channel like 8 [Source:HGNC Symbol;Acc:HGNC:20474]	-1.89349	-1.77688	0.000195616	0.00106186	Down-regulated
ENSG00000262089	0	novel transcript	-1.10083	0.549549	0.000197737	0.00107273	Down-regulated
ENSG00000272787	0	novel transcript	-1.22424	0.440101	0.000200279	0.00108327	Down-regulated
ENSG00000196421	C20orf204	chromosome 20 open reading frame 204 [Source:HGNC Symbol;Acc:HGNC:27655]	-1.23463	1.00101	0.00020286	0.00109428	Down-regulated
ENSG00000172379	ARNT2	aryl hydrocarbon receptor nuclear translocator 2 [Source:HGNC Symbol;Acc:HGNC:16876]	-2.90409	-2.13805	0.000211683	0.00113308	Down-regulated
ENSG00000185955	C7orf61	chromosome 7 open reading frame 61 [Source:HGNC Symbol;Acc:HGNC:22135]	-2.26463	-1.70621	0.000217403	0.00115889	Down-regulated
ENSG00000255508	0	novel protein	-1.82234	-0.397529	0.000221529	0.0011763	Down-regulated
ENSG00000260261	0	programmed cell death 6 (PDCD6) pseudogene	-1.02306	1.98812	0.000222646	0.00118091	Down-regulated
ENSG00000153132	CLGN	calmegin [Source:HGNC Symbol;Acc:HGNC:2060]	-1.19075	0.571072	0.000223607	0.00118531	Down-regulated
ENSG00000233822	H2BC15	H2B clustered histone 15 [Source:HGNC Symbol;Acc:HGNC:4749]	-1.2004	1.66981	0.000224789	0.00119031	Down-regulated
ENSG00000148082	SHC3	SHC adaptor protein 3 [Source:HGNC Symbol;Acc:HGNC:18181]	1.48792	1.35154	0.000226793	0.00119938	Up-regulated
ENSG00000272677	HNRNPD-DT	HNRNPD divergent transcript [Source:HGNC Symbol;Acc:HGNC:55205]	-1.85952	-0.357269	0.000229223	0.00120975	Down-regulated
ENSG00000185483	ROR1	receptor tyrosine kinase like orphan receptor 1 [Source:HGNC Symbol;Acc:HGNC:10256]	-1.37563	1.67069	0.000229481	0.00121076	Down-regulated
ENSG00000197442	MAP3K5	mitogen-activated protein kinase kinase kinase 5 [Source:HGNC Symbol;Acc:HGNC:6857]	1.07817	3.14789	0.000229945	0.00121285	Up-regulated
ENSG00000169885	CALML6	calmodulin like 6 [Source:HGNC Symbol;Acc:HGNC:24193]	-1.62345	-0.359268	0.000230076	0.001213	Down-regulated
ENSG00000129028	THAP10	THAP domain containing 10 [Source:HGNC Symbol;Acc:HGNC:23193]	-1.01007	0.946035	0.000230586	0.00121517	Down-regulated
ENSG00000136371	MTHFS	methenyltetrahydrofolate synthetase [Source:HGNC Symbol;Acc:HGNC:7437]	1.07803	0.541229	0.000230772	0.0012158	Up-regulated
ENSG00000136960	ENPP2	ectonucleotide pyrophosphatase/phosphodiesterase 2 [Source:HGNC Symbol;Acc:HGNC:3357]	-2.18238	-1.54441	0.00023741	0.00124604	Down-regulated
ENSG00000288823	0	novel transcript	-1.4178	1.06486	0.00023783	0.00124752	Down-regulated
ENSG00000167874	TMEM88	transmembrane protein 88 [Source:HGNC Symbol;Acc:HGNC:32371]	-1.59417	-0.165066	0.00023833	0.0012492	Down-regulated
ENSG00000010932	FMO1	flavin containing dimethylaniline monoxygenase 1 [Source:HGNC Symbol;Acc:HGNC:3769]	1.66338	1.93079	0.000239122	0.00125175	Up-regulated
ENSG00000270720	0	novel transcript	-1.43129	-0.497582	0.000240104	0.0012558	Down-regulated
ENSG00000196338	NLGN3	neuroligin 3 [Source:HGNC Symbol;Acc:HGNC:14289]	-1.07065	1.40326	0.000240348	0.00125671	Down-regulated
ENSG00000262202	0	novel transcript	-2.24202	-1.57461	0.00024062	0.00125777	Down-regulated
ENSG00000274213	0	novel transcript	-2.23128	-0.568814	0.000241822	0.00126369	Down-regulated
ENSG00000279765	0	novel protein	-2.46698	-0.978648	0.000241983	0.001264	Down-regulated
ENSG00000133424	LARGE1	LARGE xylosyl- and glucuronyltransferase 1 [Source:HGNC Symbol;Acc:HGNC:6511]	1.06266	4.79646	0.000242488	0.00126607	Up-regulated
ENSG00000172426	RSPH9	radial spoke head component 9 [Source:HGNC Symbol;Acc:HGNC:21057]	-3.15132	-1.76953	0.000242994	0.00126798	Down-regulated
ENSG00000166923	GREM1	gremlin 1, DAN family BMP antagonist [Source:HGNC Symbol;Acc:HGNC:2001]	-1.25678	1.05339	0.00024563	0.0012799	Down-regulated
ENSG00000275846	0	novel transcript	-3.14641	-1.78682	0.000245809	0.00128013	Down-regulated
ENSG00000202111	VTRNA1-2	vault RNA 1-2 [Source:HGNC Symbol;Acc:HGNC:12655]	-2.54856	-0.937682	0.00024673	0.00128414	Down-regulated
ENSG00000162009	SSTR5	somatostatin receptor 5 [Source:HGNC Symbol;Acc:HGNC:11334]	2.19906	-1.97823	0.000248281	0.00129109	Up-regulated
ENSG00000235944	ZNF815P	zinc finger protein 815, pseudogene [Source:HGNC Symbol;Acc:HGNC:22029]	1.43116	0.224663	0.000252466	0.00131096	Up-regulated
ENSG00000286207	0	novel transcript, antisense to FMNL2	-1.08381	1.89227	0.000254824	0.00132169	Down-regulated
ENSG00000166532	RIMKLB	ribosomal modification protein rimK like family member B [Source:HGNC Symbol;Acc:HGNC:29228]	-1.23837	2.47459	0.000263214	0.0013578	Down-regulated
ENSG00000258947	TUBB3	tubulin beta 3 class III [Source:HGNC Symbol;Acc:HGNC:20772]	-1.54595	0.514171	0.000265454	0.00136584	Down-regulated
ENSG00000234112	0	endometrial bleeding associated factor (left-right determination, factor A; transforming growth factor beta superfamily) (EBAF) pseudogene	-2.87046	-2.28624	0.000266532	0.00137022	Down-regulated
ENSG00000242732	RTL5	retrotransposon Gag like 5 [Source:HGNC Symbol;Acc:HGNC:29430]	-1.47043	-0.113005	0.000270463	0.0013853	Down-regulated
ENSG00000116748	AMPD1	adenosine monophosphate deaminase 1 [Source:HGNC Symbol;Acc:HGNC:468]	-2.17719	-1.30334	0.00027293	0.00139674	Down-regulated
ENSG00000289285	0	novel transcript, antisense to ARPC5L	-1.96392	0.400417	0.000274087	0.00140187	Down-regulated
ENSG00000274290	H2BC6	H2B clustered histone 6 [Source:HGNC Symbol;Acc:HGNC:4753]	-1.4225	0.548932	0.000274654	0.00140318	Down-regulated
ENSG00000275880	0	novel transcript, antisense to CARKD	-1.11324	0.538691	0.000276523	0.00141153	Down-regulated
ENSG00000287175	0	novel transcript	-1.08187	0.0987627	0.000280583	0.00142822	Down-regulated
ENSG00000261058	0	novel transcript	1.06043	1.43676	0.000281539	0.00143188	Up-regulated
ENSG00000270503	YTHDF2P1	YTH domain family member 2 pseudogene 1 [Source:HGNC Symbol;Acc:HGNC:19865]	-2.98208	-2.21218	0.000282406	0.00143507	Down-regulated
ENSG00000161381	PLXDC1	plexin domain containing 1 [Source:HGNC Symbol;Acc:HGNC:20945]	-2.00267	-0.952109	0.000282904	0.00143629	Down-regulated
ENSG00000143494	VASH2	vasohibin 2 [Source:HGNC Symbol;Acc:HGNC:25723]	1.14925	1.98007	0.000282909	0.00143629	Up-regulated
ENSG00000272195	0	novel transcript, antisense to EFCAB2	-1.49604	-0.441282	0.000290023	0.00146553	Down-regulated
ENSG00000214353	VAC14-AS1	VAC14 antisense RNA 1 [Source:HGNC Symbol;Acc:HGNC:48605]	1.90375	-0.471938	0.000291328	0.00147124	Up-regulated
ENSG00000284602	0	novel transcript	-1.81901	0.657153	0.000294784	0.00148502	Down-regulated
ENSG00000265565	MIR3143	microRNA 3143 [Source:HGNC Symbol;Acc:HGNC:38284]	-2.65928	-2.02583	0.000295171	0.00148655	Down-regulated
ENSG00000204248	COL11A2	collagen type XI alpha 2 chain [Source:HGNC Symbol;Acc:HGNC:2187]	-1.166	1.49875	0.000295961	0.00148846	Down-regulated
ENSG00000183801	OLFML1	olfactomedin like 1 [Source:HGNC Symbol;Acc:HGNC:24473]	-1.42389	0.818134	0.000297958	0.00149517	Down-regulated
ENSG00000271659	0	novel transcript, antisense to PTCH1	-1.24943	0.473466	0.00030056	0.00150614	Down-regulated
ENSG00000267430	0	proteasome (prosome, macropain) 26S subunit, ATPase, 5 (PSMC5) pseudogene	-2.8369	-2.19783	0.000300738	0.00150661	Down-regulated
ENSG00000225339	0	novel transcript, antisense to C6orf1	-1.55662	-0.32422	0.000301388	0.00150945	Down-regulated
ENSG00000243710	CFAP57	cilia and flagella associated protein 57 [Source:HGNC Symbol;Acc:HGNC:26485]	-1.28666	-0.380907	0.000304618	0.00152225	Down-regulated
ENSG00000233621	LINC01137	long intergenic non-protein coding RNA 1137 [Source:HGNC Symbol;Acc:HGNC:49453]	1.08732	0.732086	0.000304804	0.00152275	Up-regulated
ENSG00000259343	TMC3-AS1	TMC3 antisense RNA 1 [Source:HGNC Symbol;Acc:HGNC:51424]	1.77735	0.575501	0.000305179	0.001524	Up-regulated
ENSG00000214019	RBM39P1	RBM39 pseudogene 1 [Source:HGNC Symbol;Acc:HGNC:54942]	-1.39773	-0.230421	0.000305346	0.0015242	Down-regulated
ENSG00000224655	LINC01823	long intergenic non-protein coding RNA 1823 [Source:HGNC Symbol;Acc:HGNC:52628]	-2.26251	-1.00229	0.000307265	0.00153154	Down-regulated
ENSG00000135960	EDAR	ectodysplasin A receptor [Source:HGNC Symbol;Acc:HGNC:2895]	-1.29296	1.235	0.000307495	0.00153196	Down-regulated
ENSG00000274494	MIR6832	microRNA 6832 [Source:HGNC Symbol;Acc:HGNC:50140]	-2.3647	-2.18556	0.000308247	0.00153511	Down-regulated
ENSG00000251562	MALAT1	metastasis associated lung adenocarcinoma transcript 1 [Source:HGNC Symbol;Acc:HGNC:29665]	-1.29007	9.72496	0.000310809	0.00154506	Down-regulated
ENSG00000272558	0	novel transcript, antisense to TRIM38	-2.97351	-2.29867	0.000311444	0.00154694	Down-regulated
ENSG00000289393	0	novel transcript	-1.22418	1.02064	0.000313489	0.00155539	Down-regulated
ENSG00000174177	CTU2	cytosolic thiouridylase subunit 2 [Source:HGNC Symbol;Acc:HGNC:28005]	-1.01148	1.70158	0.000316265	0.00156658	Down-regulated
ENSG00000184979	USP18	ubiquitin specific peptidase 18 [Source:HGNC Symbol;Acc:HGNC:12616]	1.27395	0.302749	0.000319121	0.0015777	Up-regulated
ENSG00000249131	PSD2-AS1	PSD2 antisense RNA 1 [Source:HGNC Symbol;Acc:HGNC:52765]	-2.55044	-1.78244	0.000320387	0.00158309	Down-regulated
ENSG00000144035	NAT8	N-acetyltransferase 8 (putative) [Source:HGNC Symbol;Acc:HGNC:18069]	1.62321	0.273732	0.000323327	0.00159481	Up-regulated
ENSG00000260490	MYL12BP1	MYL12B pseudogene 1 [Source:HGNC Symbol;Acc:HGNC:51649]	-1.78072	-0.509324	0.00032425	0.00159824	Down-regulated
ENSG00000279722	0	novel transcript	1.20178	0.389179	0.000324373	0.00159841	Up-regulated
ENSG00000109158	GABRA4	gamma-aminobutyric acid type A receptor subunit alpha4 [Source:HGNC Symbol;Acc:HGNC:4078]	1.20477	0.782429	0.000324514	0.00159867	Up-regulated
ENSG00000271869	DCTN6-DT	DCTN6 divergent transcript [Source:HGNC Symbol;Acc:HGNC:55241]	-1.5548	-0.719493	0.000330689	0.00162245	Down-regulated
ENSG00000272345	0	novel transcript, antisense to ACOT13	-1.15633	0.873411	0.000331449	0.0016253	Down-regulated
ENSG00000147437	GNRH1	gonadotropin releasing hormone 1 [Source:HGNC Symbol;Acc:HGNC:4419]	-1.24915	2.35975	0.000340189	0.00166004	Down-regulated
ENSG00000271855	0	novel transcript	-2.02068	-1.3186	0.000340559	0.0016614	Down-regulated
ENSG00000215148	PRSS41	serine protease 41 [Source:HGNC Symbol;Acc:HGNC:30715]	-2.53247	-2.11711	0.000342392	0.00166972	Down-regulated
ENSG00000275709	0	novel transcript	-1.73606	-0.498223	0.000342729	0.00167063	Down-regulated
ENSG00000258646	0	novel transcript, antisense to EIF2B2	-2.03715	-1.67938	0.000343399	0.00167299	Down-regulated
ENSG00000210049	MT-TF	mitochondrially encoded tRNA-Phe (UUU/C) [Source:HGNC Symbol;Acc:HGNC:7481]	-1.78748	0.742511	0.000347519	0.00169079	Down-regulated
ENSG00000259775	0	novel transcript, antisense to EIF5	-1.49239	0.188901	0.000348508	0.00169468	Down-regulated
ENSG00000260743	0	novel transcript	-1.82273	-1.32033	0.000353997	0.00171768	Down-regulated
ENSG00000233547	0	novel transcript	-1.47352	-0.504749	0.000354475	0.00171953	Down-regulated
ENSG00000260367	0	novel transcript, antisense to SPNS1	-1.42437	-0.790315	0.00035468	0.0017196	Down-regulated
ENSG00000236283	0	novel transcript, antisense to SLC38A11 and SCN3A	1.44098	0.971479	0.000355185	0.00172159	Up-regulated
ENSG00000143882	ATP6V1C2	ATPase H+ transporting V1 subunit C2 [Source:HGNC Symbol;Acc:HGNC:18264]	-1.07529	2.63237	0.000358497	0.00173531	Down-regulated
ENSG00000262117	BCAR4	breast cancer anti-estrogen resistance 4 [Source:HGNC Symbol;Acc:HGNC:22170]	-2.05751	-1.56019	0.000360193	0.00174165	Down-regulated
ENSG00000279953	0	novel transcript	-2.10604	-1.78247	0.000366809	0.00176797	Down-regulated
ENSG00000280184	0	TEC	-1.73826	-0.717053	0.000371161	0.00178608	Down-regulated
ENSG00000246777	DYNC1LI2-DT	DYNC1LI2 divergent transcript [Source:HGNC Symbol;Acc:HGNC:52990]	-1.11853	0.267814	0.000373575	0.00179674	Down-regulated
ENSG00000188089	PLA2G4E	phospholipase A2 group IVE [Source:HGNC Symbol;Acc:HGNC:24791]	1.13596	1.41465	0.000378849	0.00181841	Up-regulated
ENSG00000163629	PTPN13	protein tyrosine phosphatase non-receptor type 13 [Source:HGNC Symbol;Acc:HGNC:9646]	-1.18253	0.69561	0.000379425	0.0018204	Down-regulated
ENSG00000228701	TNKS2-AS1	TNKS2 antisense RNA 1 (head to head) [Source:HGNC Symbol;Acc:HGNC:45173]	-1.00155	0.566296	0.000384428	0.00184012	Down-regulated
ENSG00000144063	MALL	mal, T cell differentiation protein like [Source:HGNC Symbol;Acc:HGNC:6818]	1.28438	1.01483	0.000384725	0.00184056	Up-regulated
ENSG00000249231	CASC16	cancer susceptibility 16 [Source:HGNC Symbol;Acc:HGNC:48608]	1.23078	0.213215	0.000385815	0.00184358	Up-regulated
ENSG00000289122	0	novel transcript	1.01809	0.559502	0.000387425	0.00184859	Up-regulated
ENSG00000233797	UFL1-AS1	UFL1 antisense RNA 1 [Source:HGNC Symbol;Acc:HGNC:41007]	-1.35126	0.665954	0.000391669	0.00186637	Down-regulated
ENSG00000181754	AMIGO1	adhesion molecule with Ig like domain 1 [Source:HGNC Symbol;Acc:HGNC:20824]	1.12703	1.36858	0.00039179	0.00186645	Up-regulated
ENSG00000218281	H2AC9P	H2A clustered histone 9, pseudogene [Source:HGNC Symbol;Acc:HGNC:18805]	-3.34794	-2.42383	0.000395126	0.00187964	Down-regulated
ENSG00000226380	0	novel transcript	-1.52977	-1.12946	0.000398558	0.00189121	Down-regulated
ENSG00000263201	DPEP2NB	DPEP2 neighbor [Source:HGNC Symbol;Acc:HGNC:52385]	-2.88513	-0.9273	0.000399709	0.00189618	Down-regulated
ENSG00000151963	ZNF37CP	zinc finger protein 37C, pseudogene [Source:HGNC Symbol;Acc:HGNC:29445]	-2.00679	-1.54068	0.00040015	0.00189727	Down-regulated
ENSG00000223635	0	novel transcript	-2.446	-1.95156	0.000403222	0.00190983	Down-regulated
ENSG00000232850	PTGES2-AS1	PTGES2 antisense RNA 1 (head to head) [Source:NCBI gene (formerly Entrezgene);Acc:389791]	-1.46753	-0.420004	0.000405308	0.0019177	Down-regulated
ENSG00000187808	SOWAHD	sosondowah ankyrin repeat domain family member D [Source:HGNC Symbol;Acc:HGNC:32960]	1.08351	0.632319	0.000407084	0.00192409	Up-regulated
ENSG00000111644	ACRBP	acrosin binding protein [Source:HGNC Symbol;Acc:HGNC:17195]	-1.01567	1.47545	0.000410053	0.00193609	Down-regulated
ENSG00000235097	LINC00330	long intergenic non-protein coding RNA 330 [Source:HGNC Symbol;Acc:HGNC:42047]	2.05616	0.997728	0.000410379	0.00193712	Up-regulated
ENSG00000124915	MYRF-AS1	MYRF antisense RNA 1 [Source:HGNC Symbol;Acc:HGNC:24506]	-1.01155	0.922494	0.000411483	0.00194031	Down-regulated
ENSG00000229557	LINC00379	long intergenic non-protein coding RNA 379 [Source:HGNC Symbol;Acc:HGNC:42705]	1.20824	0.604903	0.000411614	0.00194042	Up-regulated
ENSG00000167549	CORO6	coronin 6 [Source:HGNC Symbol;Acc:HGNC:21356]	-1.79169	-1.12421	0.000411973	0.00194142	Down-regulated
ENSG00000227791	RPS10P9	ribosomal protein S10 pseudogene 9 [Source:HGNC Symbol;Acc:HGNC:36451]	-2.34615	-2.03786	0.00041204	0.00194142	Down-regulated
ENSG00000273777	CEACAM20	CEA cell adhesion molecule 20 [Source:HGNC Symbol;Acc:HGNC:24879]	1.1609	2.17161	0.000416313	0.00195899	Up-regulated
ENSG00000166446	CDYL2	chromodomain Y like 2 [Source:HGNC Symbol;Acc:HGNC:23030]	-1.1604	0.481061	0.000416833	0.0019594	Down-regulated
ENSG00000163141	BNIPL	BCL2 interacting protein like [Source:HGNC Symbol;Acc:HGNC:16976]	-1.20027	0.866698	0.000419779	0.00196966	Down-regulated
ENSG00000261242	0	novel transcript, antisense to PPP2R5E	-1.5988	-0.90486	0.000425761	0.0019941	Down-regulated
ENSG00000223508	RPL23AP53	ribosomal protein L23a pseudogene 53 [Source:HGNC Symbol;Acc:HGNC:35921]	-1.30683	-0.339926	0.000430772	0.00201443	Down-regulated
ENSG00000226741	LINC02554	long intergenic non-protein coding RNA 2554 [Source:HGNC Symbol;Acc:HGNC:53594]	1.896	-0.384822	0.000431847	0.00201894	Up-regulated
ENSG00000241135	LINC00881	long intergenic non-protein coding RNA 881 [Source:HGNC Symbol;Acc:HGNC:48567]	-2.10983	-1.44417	0.000432917	0.00202342	Down-regulated
ENSG00000257696	UHRF1BP1L-DT	UHRF1BP1L divergent transcript [Source:HGNC Symbol;Acc:HGNC:55473]	-1.4274	-0.419754	0.000433845	0.0020261	Down-regulated
ENSG00000108342	CSF3	colony stimulating factor 3 [Source:HGNC Symbol;Acc:HGNC:2438]	-3.16778	-2.50882	0.000433941	0.0020261	Down-regulated
ENSG00000287387	0	novel transcript, antisense to ZFP36L2	-1.70941	-0.471239	0.000434353	0.00202751	Down-regulated
ENSG00000157306	ZFHX2-AS1	ZFHX2 antisense RNA 1 [Source:HGNC Symbol;Acc:HGNC:52658]	-1.06565	1.11596	0.00043624	0.00203474	Down-regulated
ENSG00000285825	CCDC15-DT	CCDC15 divergent transcript [Source:HGNC Symbol;Acc:HGNC:54193]	-1.48271	0.214511	0.000437892	0.00204051	Down-regulated
ENSG00000275894	0	novel transcript, sense intronic to SDC4	-2.13645	0.380048	0.000438275	0.00204106	Down-regulated
ENSG00000224189	HAGLR	HOXD antisense growth-associated long non-coding RNA [Source:HGNC Symbol;Acc:HGNC:43755]	1.23005	0.741494	0.000443387	0.00205956	Up-regulated
ENSG00000204949	FAM83A-AS1	FAM83A antisense RNA 1 [Source:HGNC Symbol;Acc:HGNC:48658]	-1.91829	-1.59682	0.000443958	0.00206115	Down-regulated
ENSG00000244086	0	ribosomal protein S20 pseudogene 35	-1.96609	-2.08014	0.000446012	0.00206856	Down-regulated
ENSG00000236496	GPS2P1	G protein pathway suppressor 2 pseudogene 1 [Source:HGNC Symbol;Acc:HGNC:49622]	-1.37618	-1.0407	0.000447062	0.0020729	Down-regulated
ENSG00000233184	0	novel transcript	-1.2768	0.135744	0.000449163	0.00208104	Down-regulated
ENSG00000264017	RN7SL336P	RNA, 7SL, cytoplasmic 336, pseudogene [Source:HGNC Symbol;Acc:HGNC:46352]	-2.02313	-1.68904	0.000449883	0.00208331	Down-regulated
ENSG00000196388	INCA1	inhibitor of CDK, cyclin A1 interacting protein 1 [Source:HGNC Symbol;Acc:HGNC:32224]	-1.09624	1.36824	0.000450643	0.00208557	Down-regulated
ENSG00000141293	SKAP1	src kinase associated phosphoprotein 1 [Source:HGNC Symbol;Acc:HGNC:15605]	1.07136	1.48655	0.00045072	0.00208557	Up-regulated
ENSG00000253616	0	novel transcript	1.38205	-0.179515	0.000452692	0.00209202	Up-regulated
ENSG00000131845	ZNF304	zinc finger protein 304 [Source:HGNC Symbol;Acc:HGNC:13505]	-1.66885	-0.188973	0.000454981	0.002101	Down-regulated
ENSG00000248323	LUCAT1	lung cancer associated transcript 1 [Source:HGNC Symbol;Acc:HGNC:48498]	-1.38186	0.385883	0.00045617	0.00210594	Down-regulated
ENSG00000239857	GET4	guided entry of tail-anchored proteins factor 4 [Source:HGNC Symbol;Acc:HGNC:21690]	-1.15453	2.93555	0.000456385	0.00210639	Down-regulated
ENSG00000223979	SMCR2	Smith-Magenis syndrome chromosome region, candidate 2 [Source:HGNC Symbol;Acc:HGNC:17914]	-1.30694	-1.40759	0.00045698	0.0021086	Down-regulated
ENSG00000173947	PIFO	primary cilia formation [Source:HGNC Symbol;Acc:HGNC:27009]	1.00548	1.37545	0.000465901	0.00214319	Up-regulated
ENSG00000223356	0	novel transcript	-2.02622	-1.38942	0.000467028	0.00214674	Down-regulated
ENSG00000272146	ARF4-AS1	ARF4 antisense RNA 1 [Source:HGNC Symbol;Acc:HGNC:51593]	-1.24526	-0.409761	0.000470973	0.00216212	Down-regulated
ENSG00000179292	TMEM151A	transmembrane protein 151A [Source:HGNC Symbol;Acc:HGNC:28497]	1.14685	2.39974	0.000476345	0.00218068	Up-regulated
ENSG00000124721	DNAH8	dynein axonemal heavy chain 8 [Source:HGNC Symbol;Acc:HGNC:2952]	2.53709	-0.934907	0.00047758	0.00218354	Up-regulated
ENSG00000231609	0	novel transcript, antisense to EHBP1	-1.83754	-0.970433	0.000479173	0.00218919	Down-regulated
ENSG00000261136	0	novel transcript, antisense to FSIP1	-1.10294	1.6032	0.00048637	0.0022187	Down-regulated
ENSG00000118322	ATP10B	ATPase phospholipid transporting 10B (putative) [Source:HGNC Symbol;Acc:HGNC:13543]	1.47668	1.40279	0.000487217	0.00222088	Up-regulated
ENSG00000104371	DKK4	dickkopf WNT signaling pathway inhibitor 4 [Source:HGNC Symbol;Acc:HGNC:2894]	1.0016	0.242346	0.000488935	0.00222647	Up-regulated
ENSG00000286234	0	novel transcript	-1.26677	-0.909563	0.000489158	0.00222692	Down-regulated
ENSG00000286113	0	long intergenic non-protein coding RNA 1617	-2.06387	-0.781948	0.000494319	0.00224645	Down-regulated
ENSG00000277020	0	novel transcript, antisense to IFT88	-1.63497	-0.619638	0.000497812	0.00225778	Down-regulated
ENSG00000242779	ZNF702P	zinc finger protein 702, pseudogene [Source:HGNC Symbol;Acc:HGNC:25775]	-1.35847	0.0678667	0.000501844	0.00227321	Down-regulated
ENSG00000270021	0	novel transcript, antisense to H2AFY	-1.19745	0.232185	0.000504107	0.00228258	Down-regulated
ENSG00000286885	0	novel transcript	-1.50368	-0.681724	0.000511474	0.00231334	Down-regulated
ENSG00000198917	SPOUT1	SPOUT domain containing methyltransferase 1 [Source:HGNC Symbol;Acc:HGNC:26933]	-1.99876	-1.67392	0.000514829	0.00232523	Down-regulated
ENSG00000285884	0	novel transcript	-1.26413	0.650915	0.000517036	0.00233383	Down-regulated
ENSG00000134193	REG4	regenerating family member 4 [Source:HGNC Symbol;Acc:HGNC:22977]	-1.27677	1.70544	0.000518118	0.00233813	Down-regulated
ENSG00000172350	ABCG4	ATP binding cassette subfamily G member 4 [Source:HGNC Symbol;Acc:HGNC:13884]	-1.95582	-1.89462	0.000522097	0.00235491	Down-regulated
ENSG00000234006	DDX39B-AS1	DDX39B antisense RNA 1 [Source:HGNC Symbol;Acc:HGNC:39771]	-2.21101	-1.93502	0.000536614	0.00241136	Down-regulated
ENSG00000287190	0	novel transcript	-1.79048	-0.578537	0.000538493	0.0024186	Down-regulated
ENSG00000157765	SLC34A2	solute carrier family 34 member 2 [Source:HGNC Symbol;Acc:HGNC:11020]	-1.24108	0.418064	0.000543807	0.0024364	Down-regulated
ENSG00000237624	OXCT2P1	3-oxoacid CoA-transferase 2 pseudogene 1 [Source:HGNC Symbol;Acc:HGNC:21627]	2.09189	-1.02808	0.000545969	0.00244422	Up-regulated
ENSG00000128408	RIBC2	RIB43A domain with coiled-coils 2 [Source:HGNC Symbol;Acc:HGNC:13241]	1.0664	0.575302	0.000546092	0.00244422	Up-regulated
ENSG00000270482	0	novel transcript	-1.39173	-0.565567	0.00054737	0.00244751	Down-regulated
ENSG00000122735	DNAI1	dynein axonemal intermediate chain 1 [Source:HGNC Symbol;Acc:HGNC:2954]	-2.49068	-1.26008	0.000551362	0.00245988	Down-regulated
ENSG00000263731	0	novel transcript	-1.03725	2.88474	0.000552242	0.00246259	Down-regulated
ENSG00000178162	FAR2P2	fatty acyl-CoA reductase 2 pseudogene 2 [Source:HGNC Symbol;Acc:HGNC:49279]	1.0071	2.07517	0.000552565	0.00246342	Up-regulated
ENSG00000280378	0	TEC	-1.20122	0.296383	0.000557412	0.00248135	Down-regulated
ENSG00000280383	0	novel transcript, sense overlapping ATXN10	-1.90665	-0.489837	0.000558535	0.00248452	Down-regulated
ENSG00000088002	SULT2B1	sulfotransferase family 2B member 1 [Source:HGNC Symbol;Acc:HGNC:11459]	2.02569	-1.25878	0.000563195	0.00250278	Up-regulated
ENSG00000279742	0	TEC	-1.01509	0.573885	0.000569479	0.00252449	Down-regulated
ENSG00000178726	THBD	thrombomodulin [Source:HGNC Symbol;Acc:HGNC:11784]	-1.46551	-0.729412	0.000572744	0.00253586	Down-regulated
ENSG00000229222	KRT18P4	keratin 18 pseudogene 4 [Source:HGNC Symbol;Acc:HGNC:16604]	-1.59857	0.414299	0.00057306	0.00253663	Down-regulated
ENSG00000287548	0	novel transcript	-1.46777	-1.11525	0.000576922	0.00255122	Down-regulated
ENSG00000277548	0	novel transcript, sense intronic to CCPG1	1.78314	-0.707042	0.00058164	0.00256832	Up-regulated
ENSG00000258559	0	novel transcript, sense overlapping ABCD4	-1.03351	1.02146	0.000582893	0.00257133	Down-regulated
ENSG00000180279	LINC01869	long intergenic non-protein coding RNA 1869 [Source:HGNC Symbol;Acc:HGNC:25050]	-2.25936	-0.881341	0.000583209	0.0025721	Down-regulated
ENSG00000116745	RPE65	retinoid isomerohydrolase RPE65 [Source:HGNC Symbol;Acc:HGNC:10294]	1.44176	0.237366	0.000586277	0.00258311	Up-regulated
ENSG00000138378	STAT4	signal transducer and activator of transcription 4 [Source:HGNC Symbol;Acc:HGNC:11365]	1.09422	1.09984	0.000599866	0.00263463	Up-regulated
ENSG00000181016	LSMEM1	leucine rich single-pass membrane protein 1 [Source:HGNC Symbol;Acc:HGNC:22036]	-1.36192	-0.56763	0.000600547	0.00263697	Down-regulated
ENSG00000197153	H3C12	H3 clustered histone 12 [Source:HGNC Symbol;Acc:HGNC:4774]	-2.05421	-2.01475	0.000601689	0.00264135	Down-regulated
ENSG00000274105	0	novel transcript, sense intronic to YARS2	-1.12002	-0.243186	0.000602171	0.00264271	Down-regulated
ENSG00000114805	PLCH1	phospholipase C eta 1 [Source:HGNC Symbol;Acc:HGNC:29185]	1.20942	2.37017	0.000603646	0.00264653	Up-regulated
ENSG00000159556	ISL2	ISL LIM homeobox 2 [Source:HGNC Symbol;Acc:HGNC:18524]	-1.11536	-0.336315	0.000603748	0.00264653	Down-regulated
ENSG00000129596	CDO1	cysteine dioxygenase type 1 [Source:HGNC Symbol;Acc:HGNC:1795]	-2.18889	-1.35232	0.000607371	0.00266111	Down-regulated
ENSG00000105499	PLA2G4C	phospholipase A2 group IVC [Source:HGNC Symbol;Acc:HGNC:9037]	-1.1802	-0.621058	0.000612728	0.00267809	Down-regulated
ENSG00000175841	FAM172BP	family with sequence similarity 172 member B, pseudogene [Source:HGNC Symbol;Acc:HGNC:34336]	-2.11252	-1.58667	0.000619582	0.00270173	Down-regulated
ENSG00000141837	CACNA1A	calcium voltage-gated channel subunit alpha1 A [Source:HGNC Symbol;Acc:HGNC:1388]	-1.49456	-1.03635	0.000620573	0.00270518	Down-regulated
ENSG00000177606	JUN	Jun proto-oncogene, AP-1 transcription factor subunit [Source:HGNC Symbol;Acc:HGNC:6204]	-1.42566	5.77768	0.000623097	0.00271356	Down-regulated
ENSG00000073737	DHRS9	dehydrogenase/reductase 9 [Source:HGNC Symbol;Acc:HGNC:16888]	-1.06515	1.92079	0.000624448	0.00271813	Down-regulated
ENSG00000245025	0	novel transcript, antisense to RHOBTB2	-1.42783	-0.643087	0.000627124	0.00272715	Down-regulated
ENSG00000267114	0	novel transcript	-1.97819	-1.05452	0.000632691	0.00274475	Down-regulated
ENSG00000162148	PPP1R32	protein phosphatase 1 regulatory subunit 32 [Source:HGNC Symbol;Acc:HGNC:28869]	-1.16593	1.40269	0.000647797	0.00280221	Down-regulated
ENSG00000276148	0	novel transcript, antisense to DNM1L	-1.03067	0.19476	0.000648378	0.00280405	Down-regulated
ENSG00000250838	0	novel transcript	-1.60248	-0.161829	0.000650849	0.00281339	Down-regulated
ENSG00000181773	GPR3	G protein-coupled receptor 3 [Source:HGNC Symbol;Acc:HGNC:4484]	-1.25941	-0.250464	0.000653636	0.00282341	Down-regulated
ENSG00000288056	0	novel transcript	-1.69315	-0.68727	0.000654888	0.00282814	Down-regulated
ENSG00000162398	LEXM	lymphocyte expansion molecule [Source:HGNC Symbol;Acc:HGNC:26854]	1.19333	0.654697	0.000655706	0.00283099	Up-regulated
ENSG00000140459	CYP11A1	cytochrome P450 family 11 subfamily A member 1 [Source:HGNC Symbol;Acc:HGNC:2590]	-1.95602	-0.105687	0.000657775	0.00283925	Down-regulated
ENSG00000271447	MMP28	matrix metallopeptidase 28 [Source:HGNC Symbol;Acc:HGNC:14366]	1.0572	1.58567	0.000659272	0.00284435	Up-regulated
ENSG00000286977	0	novel transcript	1.41097	0.83202	0.000663592	0.00286026	Up-regulated
ENSG00000108387	SEPTIN4	septin 4 [Source:HGNC Symbol;Acc:HGNC:9165]	-1.13622	0.22156	0.00066505	0.00286518	Down-regulated
ENSG00000102265	TIMP1	TIMP metallopeptidase inhibitor 1 [Source:HGNC Symbol;Acc:HGNC:11820]	-1.01148	2.76782	0.000665051	0.00286518	Down-regulated
ENSG00000266401	0	novel transcript, antisense to DLGAP1	-2.21437	-1.11639	0.00066544	0.00286617	Down-regulated
ENSG00000239569	KMT2E-AS1	KMT2E antisense RNA 1 [Source:HGNC Symbol;Acc:HGNC:40845]	-1.06678	2.37842	0.000666919	0.00287061	Down-regulated
ENSG00000250376	0	pseudogene similar to part of UDP glucuronosyltransferase 2 family protein	1.42263	0.325491	0.000671365	0.0028855	Up-regulated
ENSG00000189001	SBSN	suprabasin [Source:HGNC Symbol;Acc:HGNC:24950]	-1.56978	-0.385129	0.000686816	0.00293792	Down-regulated
ENSG00000196517	SLC6A9	solute carrier family 6 member 9 [Source:HGNC Symbol;Acc:HGNC:11056]	1.15263	2.19986	0.000691255	0.00295411	Up-regulated
ENSG00000285728	0	novel transcript, antisense to PPIH	-1.69953	-1.18565	0.00069287	0.00295751	Down-regulated
ENSG00000258651	SEC23A-AS1	SEC23A antisense RNA 1 [Source:HGNC Symbol;Acc:HGNC:53213]	-1.65493	-0.836799	0.000698546	0.00297611	Down-regulated
ENSG00000071575	TRIB2	tribbles pseudokinase 2 [Source:HGNC Symbol;Acc:HGNC:30809]	-1.68242	-0.65654	0.000701839	0.00298873	Down-regulated
ENSG00000269404	SPIB	Spi-B transcription factor [Source:HGNC Symbol;Acc:HGNC:11242]	1.13282	0.878905	0.000704361	0.00299806	Up-regulated
ENSG00000229267	SNHG31	small nucleolar RNA host gene 31 [Source:HGNC Symbol;Acc:HGNC:54196]	2.07166	0.987857	0.000705891	0.00300245	Up-regulated
ENSG00000167767	KRT80	keratin 80 [Source:HGNC Symbol;Acc:HGNC:27056]	-1.97186	-0.98485	0.000706335	0.00300363	Down-regulated
ENSG00000261582	0	novel transcript	-1.55277	-0.959696	0.000709683	0.0030143	Down-regulated
ENSG00000274210	RNVU1-27	RNA, variant U1 small nuclear 27 [Source:HGNC Symbol;Acc:HGNC:54431]	-1.79667	-0.993516	0.000712966	0.0030247	Down-regulated
ENSG00000234224	TMEM229A	transmembrane protein 229A [Source:HGNC Symbol;Acc:HGNC:37279]	1.19556	0.343639	0.000715028	0.00303132	Up-regulated
ENSG00000261659	0	novel transcript, antisense to FBXL16	1.01703	0.982854	0.000721951	0.00305636	Up-regulated
ENSG00000123570	RAB9B	RAB9B, member RAS oncogene family [Source:HGNC Symbol;Acc:HGNC:14090]	1.24104	0.538659	0.000722134	0.00305642	Up-regulated
ENSG00000111186	WNT5B	Wnt family member 5B [Source:HGNC Symbol;Acc:HGNC:16265]	1.64464	-0.366038	0.000724684	0.00306506	Up-regulated
ENSG00000289096	0	novel transcript, antisense to PITX2	-2.19224	-1.66845	0.000727481	0.00307473	Down-regulated
ENSG00000146221	TCTE1	t-complex-associated-testis-expressed 1 [Source:HGNC Symbol;Acc:HGNC:11693]	-1.28034	-0.51444	0.000731015	0.00308605	Down-regulated
ENSG00000255474	GAU1	GALNT8 antisense upstream 1 [Source:HGNC Symbol;Acc:HGNC:53880]	-1.12887	-0.186852	0.00073208	0.00308838	Down-regulated
ENSG00000280129	0	TEC	-1.54019	-0.0257989	0.000733049	0.00309102	Down-regulated
ENSG00000173638	SLC19A1	solute carrier family 19 member 1 [Source:HGNC Symbol;Acc:HGNC:10937]	1.06551	2.05552	0.00073982	0.00311521	Up-regulated
ENSG00000154175	ABI3BP	ABI family member 3 binding protein [Source:HGNC Symbol;Acc:HGNC:17265]	1.03489	5.91067	0.000741586	0.00312047	Up-regulated
ENSG00000238273	0	novel transcript, antisense to FHL2	-1.84182	-1.90519	0.000750753	0.0031539	Down-regulated
ENSG00000122223	CD244	CD244 molecule [Source:HGNC Symbol;Acc:HGNC:18171]	1.08073	1.64987	0.00075887	0.0031806	Up-regulated
ENSG00000241935	HOGA1	4-hydroxy-2-oxoglutarate aldolase 1 [Source:HGNC Symbol;Acc:HGNC:25155]	1.25369	1.05976	0.000760115	0.00318434	Up-regulated
ENSG00000010327	STAB1	stabilin 1 [Source:HGNC Symbol;Acc:HGNC:18628]	1.75654	0.19172	0.000761526	0.00318729	Up-regulated
ENSG00000273365	0	novel transcript	-1.95206	-1.87792	0.000767737	0.00321031	Down-regulated
ENSG00000272356	0	novel transcript, antisense to REV3L	1.04832	1.61649	0.000774837	0.00323326	Up-regulated
ENSG00000175820	CCDC168	coiled-coil domain containing 168 [Source:HGNC Symbol;Acc:HGNC:26851]	-1.55974	-0.000591899	0.000776268	0.00323776	Down-regulated
ENSG00000235354	RPS29P16	ribosomal protein S29 pseudogene 16 [Source:HGNC Symbol;Acc:HGNC:35560]	-2.14777	-1.58633	0.000781179	0.00325672	Down-regulated
ENSG00000113492	AGXT2	alanine--glyoxylate aminotransferase 2 [Source:HGNC Symbol;Acc:HGNC:14412]	1.16481	2.49905	0.000786766	0.0032778	Up-regulated
ENSG00000202515	VTRNA1-3	vault RNA 1-3 [Source:HGNC Symbol;Acc:HGNC:12656]	-2.69071	-2.0056	0.000786962	0.0032778	Down-regulated
ENSG00000277075	H2AC8	H2A clustered histone 8 [Source:HGNC Symbol;Acc:HGNC:4724]	-1.13627	1.18315	0.000788472	0.00328333	Down-regulated
ENSG00000228317	0	novel transcript	-1.03641	0.0711101	0.000793695	0.00330127	Down-regulated
ENSG00000223734	LAPTM4A-DT	LAPTM4A divergent transcript [Source:HGNC Symbol;Acc:HGNC:54382]	-2.62197	-1.79268	0.000796743	0.00331319	Down-regulated
ENSG00000235288	0	novel transcript, antisense to CCBP2	-2.011	-1.36841	0.000798269	0.0033177	Down-regulated
ENSG00000250919	UGT2B26P	UDP glucuronosyltransferase family 2 member B26, pseudogene [Source:HGNC Symbol;Acc:HGNC:12550]	1.76298	-0.13429	0.000801277	0.00332419	Up-regulated
ENSG00000260034	LCMT1-AS2	LCMT1 antisense RNA 2 [Source:HGNC Symbol;Acc:HGNC:51178]	-1.16961	3.12365	0.00080215	0.00332648	Down-regulated
ENSG00000242082	SLC5A4-AS1	SLC5A4 antisense RNA 1 [Source:HGNC Symbol;Acc:HGNC:53163]	2.12446	0.26653	0.000811253	0.00335277	Up-regulated
ENSG00000272444	0	novel transcript	-1.34033	-0.484132	0.0008114	0.00335277	Down-regulated
ENSG00000260314	MRC1	mannose receptor C-type 1 [Source:HGNC Symbol;Acc:HGNC:7228]	2.90592	0.682087	0.000811938	0.00335398	Up-regulated
ENSG00000242198	0	ribosomal protein S26 (RPS26) pseudogene	-1.98362	-1.26112	0.000812739	0.00335652	Down-regulated
ENSG00000168350	DEGS2	delta 4-desaturase, sphingolipid 2 [Source:HGNC Symbol;Acc:HGNC:20113]	1.29325	1.16041	0.000814731	0.00336398	Up-regulated
ENSG00000231426	FILNC1	FOXO induced long non-coding RNA 1 [Source:HGNC Symbol;Acc:HGNC:53755]	1.6075	-0.568682	0.000821532	0.00338359	Up-regulated
ENSG00000288818	0	novel transcript, antisense to RB1CC1	-2.17705	-1.33123	0.000831372	0.0034194	Down-regulated
ENSG00000231966	LINC02818	long intergenic non-protein coding RNA 2818 [Source:HGNC Symbol;Acc:HGNC:54349]	-1.63685	-1.53544	0.000833672	0.00342808	Down-regulated
ENSG00000276248	0	novel transcript, sense intronic to TMCO3	-1.09745	0.0641522	0.000848969	0.00348068	Down-regulated
ENSG00000237840	FAM21FP	family with sequence similarity 21 member F, pseudogene [Source:HGNC Symbol;Acc:HGNC:45011]	-1.51363	-1.30931	0.000853728	0.00349771	Down-regulated
ENSG00000249492	0	novel transcript	-1.5606	-0.577892	0.000855132	0.00350197	Down-regulated
ENSG00000286996	0	novel transcript	-1.03125	0.0729386	0.000857034	0.00350658	Down-regulated
ENSG00000057468	MSH4	mutS homolog 4 [Source:HGNC Symbol;Acc:HGNC:7327]	-2.56007	-2.16132	0.000860134	0.00351767	Down-regulated
ENSG00000259349	APPBP2-DT	APPBP2 divergent transcript [Source:HGNC Symbol;Acc:HGNC:55423]	-1.20249	0.139896	0.000865353	0.00353508	Down-regulated
ENSG00000289253	0	novel transcript	-1.92267	-1.4562	0.000878022	0.00358028	Down-regulated
ENSG00000243083	LINC00870	long intergenic non-protein coding RNA 870 [Source:HGNC Symbol;Acc:HGNC:27319]	1.34959	0.771635	0.00087839	0.00358098	Up-regulated
ENSG00000289499	0	novel transcript	-1.79246	-0.7631	0.000880982	0.0035883	Down-regulated
ENSG00000102981	PARD6A	par-6 family cell polarity regulator alpha [Source:HGNC Symbol;Acc:HGNC:15943]	1.4299	-0.783582	0.000881888	0.00359118	Up-regulated
ENSG00000102230	PCYT1B	phosphate cytidylyltransferase 1B, choline [Source:HGNC Symbol;Acc:HGNC:8755]	1.62956	1.30514	0.000882982	0.00359483	Up-regulated
ENSG00000214269	LGMNP1	legumain pseudogene 1 [Source:HGNC Symbol;Acc:HGNC:23079]	-1.21805	0.191212	0.000886224	0.0036064	Down-regulated
ENSG00000236528	0	novel transcript	-1.73801	-0.542131	0.000897052	0.0036439	Down-regulated
ENSG00000277873	0	novel transcript, antisense to RFC5	-1.4871	-0.355244	0.00091017	0.00368227	Down-regulated
ENSG00000221883	ARIH2OS	ARIH2 opposite strand lncRNA [Source:HGNC Symbol;Acc:HGNC:34425]	-1.01062	0.835167	0.000911893	0.00368842	Down-regulated
ENSG00000073756	PTGS2	prostaglandin-endoperoxide synthase 2 [Source:HGNC Symbol;Acc:HGNC:9605]	-1.44922	0.893873	0.000918059	0.00370672	Down-regulated
ENSG00000131914	LIN28A	lin-28 homolog A [Source:HGNC Symbol;Acc:HGNC:15986]	-2.29206	-0.0249081	0.000934117	0.00376062	Down-regulated
ENSG00000228436	0	novel transcript	-1.29606	-0.613517	0.000937434	0.00377161	Down-regulated
ENSG00000169442	CD52	CD52 molecule [Source:HGNC Symbol;Acc:HGNC:1804]	-1.57387	-0.996931	0.000938867	0.0037747	Down-regulated
ENSG00000253585	0	novel transcript	-2.19906	-2.07923	0.000944811	0.00379522	Down-regulated
ENSG00000289319	0	novel transcript	-2.02262	-1.17722	0.000956209	0.00383503	Down-regulated
ENSG00000164742	ADCY1	adenylate cyclase 1 [Source:HGNC Symbol;Acc:HGNC:232]	1.55584	2.04139	0.000963297	0.00385831	Up-regulated
ENSG00000055732	MCOLN3	mucolipin TRP cation channel 3 [Source:HGNC Symbol;Acc:HGNC:13358]	-1.39735	-0.175582	0.000967343	0.00387195	Down-regulated
ENSG00000285662	FAM245B	family with sequence similarity 245 member B [Source:HGNC Symbol;Acc:HGNC:54133]	1.57282	-0.590014	0.000972626	0.00389137	Up-regulated
ENSG00000222222	RNU2-17P	RNA, U2 small nuclear 17, pseudogene [Source:HGNC Symbol;Acc:HGNC:48510]	-1.9833	-1.64404	0.000990081	0.00394721	Down-regulated
ENSG00000223509	0	WAS protein homolog associated with actin, golgi membranes and microtubules (WHAMM) pseudogene	-1.40409	-0.404883	0.000991951	0.00395292	Down-regulated
ENSG00000289559	0	novel transcript	-1.23889	-0.237025	0.000995115	0.00396378	Down-regulated
ENSG00000288826	0	novel transcript	-1.12192	0.932285	0.00099959	0.00397897	Down-regulated
ENSG00000130783	CCDC62	coiled-coil domain containing 62 [Source:HGNC Symbol;Acc:HGNC:30723]	-1.46579	-0.84296	0.00101034	0.00401117	Down-regulated
ENSG00000184502	GAST	gastrin [Source:HGNC Symbol;Acc:HGNC:4164]	-1.83045	-0.715911	0.00102486	0.00406166	Down-regulated
ENSG00000120833	SOCS2	suppressor of cytokine signaling 2 [Source:HGNC Symbol;Acc:HGNC:19382]	-1.01592	0.931844	0.00102558	0.00406363	Down-regulated
ENSG00000148926	ADM	adrenomedullin [Source:HGNC Symbol;Acc:HGNC:259]	-1.19502	4.68026	0.00102727	0.0040694	Down-regulated
ENSG00000182950	ODF3L1	outer dense fiber of sperm tails 3 like 1 [Source:HGNC Symbol;Acc:HGNC:28735]	1.30626	-1.14536	0.00103431	0.00409193	Up-regulated
ENSG00000286714	0	novel transcript	1.50526	0.896026	0.0010493	0.00414034	Up-regulated
ENSG00000169169	CPT1C	carnitine palmitoyltransferase 1C [Source:HGNC Symbol;Acc:HGNC:18540]	-1.87088	-1.04428	0.00105076	0.00414418	Down-regulated
ENSG00000230666	CEACAM22P	CEA cell adhesion molecule 22, pseudogene [Source:HGNC Symbol;Acc:HGNC:38029]	1.97446	0.198961	0.00105274	0.00414939	Up-regulated
ENSG00000172717	FAM71D	family with sequence similarity 71 member D [Source:HGNC Symbol;Acc:HGNC:20101]	-1.22701	0.453154	0.00105429	0.00415113	Down-regulated
ENSG00000276216	0	novel transcript	-1.90282	-1.57674	0.0010548	0.00415113	Down-regulated
ENSG00000287091	0	novel transcript, sense intronic to CD302and LY75-CD302	1.66862	-0.730329	0.00105502	0.00415113	Up-regulated
ENSG00000273210	0	novel transcript, antisense to DYRK1A	-1.42535	-0.721843	0.00105569	0.00415287	Down-regulated
ENSG00000278000	0	novel transcript	-1.3113	0.638421	0.00105825	0.00415932	Down-regulated
ENSG00000228648	0	novel transcript	1.42759	-0.894593	0.00106493	0.00418101	Up-regulated
ENSG00000267750	RUNDC3A-AS1	RUNDC3A antisense RNA 1 [Source:HGNC Symbol;Acc:HGNC:51344]	-1.01033	0.647702	0.0010889	0.00426677	Down-regulated
ENSG00000231131	LNCAROD	lncRNA activating regulator of DKK1 [Source:HGNC Symbol;Acc:HGNC:50913]	-1.15446	1.31347	0.00109074	0.00427026	Down-regulated
ENSG00000285569	0	novel transcript	-1.16322	-0.647844	0.00109592	0.00428776	Down-regulated
ENSG00000087589	CASS4	Cas scaffold protein family member 4 [Source:HGNC Symbol;Acc:HGNC:15878]	-1.08326	1.53245	0.00109629	0.00428829	Down-regulated
ENSG00000271780	0	novel transcript	-1.06937	0.698153	0.00109993	0.00429824	Down-regulated
ENSG00000238290	0	novel transcript	-1.63031	-1.14761	0.00110028	0.00429828	Down-regulated
ENSG00000183154	0	novel transcript, antisense to ERLIN2	-1.748	-1.35379	0.00110499	0.00431203	Down-regulated
ENSG00000256690	STX5-DT	STX5 divergent transcript [Source:HGNC Symbol;Acc:HGNC:55488]	-1.76936	-1.25581	0.00110851	0.00432485	Down-regulated
ENSG00000134042	MRO	maestro [Source:HGNC Symbol;Acc:HGNC:24121]	1.05404	2.17523	0.00110914	0.00432635	Up-regulated
ENSG00000260111	0	novel transcript, antisense to ST3GAL2	-1.49472	0.169289	0.00111886	0.00435957	Down-regulated
ENSG00000254343	0	novel transcript	2.38175	0.172828	0.00112798	0.00438943	Up-regulated
ENSG00000270039	0	novel transcript	1.27479	-0.235479	0.00113077	0.00439745	Up-regulated
ENSG00000256591	0	novel transcript	-1.40828	0.0144317	0.00113326	0.00440236	Down-regulated
ENSG00000272072	0	novel transcript, antisense to HBP1	3.03844	-0.734078	0.00113498	0.00440623	Up-regulated
ENSG00000144908	ALDH1L1	aldehyde dehydrogenase 1 family member L1 [Source:HGNC Symbol;Acc:HGNC:3978]	1.46407	1.30124	0.00114611	0.00443987	Up-regulated
ENSG00000272933	TRIM8-DT	TRIM8 divergent transcript [Source:HGNC Symbol;Acc:HGNC:55573]	-1.68081	-1.61229	0.00114959	0.00444861	Down-regulated
ENSG00000005961	ITGA2B	integrin subunit alpha 2b [Source:HGNC Symbol;Acc:HGNC:6138]	-1.08758	0.510775	0.00115882	0.00447281	Down-regulated
ENSG00000231274	SBK3	SH3 domain binding kinase family member 3 [Source:HGNC Symbol;Acc:HGNC:44121]	-1.14376	-0.236428	0.00116358	0.00448875	Down-regulated
ENSG00000289032	0	novel transcript	-2.03236	-1.86192	0.00116398	0.00448889	Down-regulated
ENSG00000255153	TOLLIP-DT	TOLLIP divergent transcript [Source:HGNC Symbol;Acc:HGNC:27403]	-1.05559	0.545108	0.00116749	0.00449853	Down-regulated
ENSG00000133027	PEMT	phosphatidylethanolamine N-methyltransferase [Source:HGNC Symbol;Acc:HGNC:8830]	1.06859	2.72263	0.00116982	0.00450467	Up-regulated
ENSG00000278876	0	TEC	-1.3415	-0.38411	0.00117076	0.00450734	Down-regulated
ENSG00000234405	0	novel transcript	-1.89512	-1.37359	0.0011711	0.0045077	Down-regulated
ENSG00000253897	0	solute carrier family 36 (proton/amino acid symporter) pseudogene	1.00856	1.72365	0.00118466	0.00455213	Up-regulated
ENSG00000287808	0	novel transcript, antisense to DHX9	-1.07351	0.676297	0.00118563	0.0045539	Down-regulated
ENSG00000135436	FAM186B	family with sequence similarity 186 member B [Source:HGNC Symbol;Acc:HGNC:25296]	1.45421	-0.0537976	0.00119613	0.00458838	Up-regulated
ENSG00000229951	FLJ31356	uncharacterized protein FLJ31356 [Source:NCBI gene (formerly Entrezgene);Acc:403150]	-1.07524	-0.172489	0.00120437	0.00461607	Down-regulated
ENSG00000112964	GHR	growth hormone receptor [Source:HGNC Symbol;Acc:HGNC:4263]	1.60239	3.1807	0.00121663	0.00465461	Up-regulated
ENSG00000122477	LRRC39	leucine rich repeat containing 39 [Source:HGNC Symbol;Acc:HGNC:28228]	-1.3833	-0.452203	0.00122347	0.00467934	Down-regulated
ENSG00000249664	0	novel transcript	-2.22236	-2.30026	0.00124068	0.00473714	Down-regulated
ENSG00000284773	0	novel protein	-1.2832	0.692691	0.00124318	0.00474368	Down-regulated
ENSG00000234005	GAPDHP22	glyceraldehyde 3 phosphate dehydrogenase pseudogene 22 [Source:HGNC Symbol;Acc:HGNC:37774]	-2.01131	-1.30102	0.00125057	0.00476246	Down-regulated
ENSG00000102053	ZC3H12B	zinc finger CCCH-type containing 12B [Source:HGNC Symbol;Acc:HGNC:17407]	1.78973	3.01829	0.00125665	0.00478094	Up-regulated
ENSG00000289229	0	novel transcript	-2.03048	-1.81235	0.00125831	0.00478523	Down-regulated
ENSG00000226532	0	pseudogene similar to part of ribosomal protein, large, P1 (RPLP1)	-1.6015	-0.144754	0.00126406	0.00480466	Down-regulated
ENSG00000278987	0	TEC	-1.51716	-0.219394	0.0012671	0.00481359	Down-regulated
ENSG00000286883	0	novel transcript, antisense to CCDC142and MRPL53and MOGS	-1.99931	-2.10269	0.00128618	0.00487376	Down-regulated
ENSG00000272334	0	novel transcript	-1.59967	-0.553166	0.00129229	0.00489384	Down-regulated
ENSG00000175287	PHYHD1	phytanoyl-CoA dioxygenase domain containing 1 [Source:HGNC Symbol;Acc:HGNC:23396]	-1.18581	-1.05235	0.00130821	0.00494171	Down-regulated
ENSG00000130005	GAMT	guanidinoacetate N-methyltransferase [Source:HGNC Symbol;Acc:HGNC:4136]	1.0031	2.63711	0.00131898	0.00497854	Up-regulated
ENSG00000203896	LIME1	Lck interacting transmembrane adaptor 1 [Source:HGNC Symbol;Acc:HGNC:26016]	-1.09817	2.00791	0.00132257	0.00498968	Down-regulated
ENSG00000248671	ALG1L9P	ALG1 like 9, pseudogene [Source:NCBI gene (formerly Entrezgene);Acc:285407]	1.45531	-0.282931	0.00132479	0.00499596	Up-regulated
ENSG00000214851	LINC00612	long intergenic non-protein coding RNA 612 [Source:HGNC Symbol;Acc:HGNC:28621]	-1.59724	-0.498152	0.00133597	0.00503498	Down-regulated
ENSG00000262691	0	novel transcript	-1.49303	-0.847032	0.00133856	0.00504368	Down-regulated
ENSG00000126759	CFP	complement factor properdin [Source:HGNC Symbol;Acc:HGNC:8864]	-1.74369	-0.964858	0.00134355	0.00505779	Down-regulated
ENSG00000259370	0	novel transcript, antisense to TLN2	1.46693	-0.709179	0.00134598	0.00506475	Up-regulated
ENSG00000279265	0	TEC	-1.09799	0.620224	0.00136446	0.00511248	Down-regulated
ENSG00000233854	POU6F2-AS2	POU6F2 antisense RNA 2 [Source:HGNC Symbol;Acc:HGNC:21887]	1.14214	-0.100676	0.00136688	0.00511943	Up-regulated
ENSG00000258102	MAP1LC3B2	microtubule associated protein 1 light chain 3 beta 2 [Source:HGNC Symbol;Acc:HGNC:34390]	-1.05509	-0.0326683	0.00137023	0.00512985	Down-regulated
ENSG00000124701	APOBEC2	apolipoprotein B mRNA editing enzyme catalytic subunit 2 [Source:HGNC Symbol;Acc:HGNC:605]	1.13608	0.346654	0.00137984	0.00515795	Up-regulated
ENSG00000231882	F10-AS1	F10 antisense RNA 1 [Source:HGNC Symbol;Acc:HGNC:40225]	-2.63938	-2.22982	0.00138375	0.00516973	Down-regulated
ENSG00000228360	0	ribosomal protein L37a (RPL37A) pseudogene	-2.05225	-1.90907	0.00139259	0.0051969	Down-regulated
ENSG00000247081	BAALC-AS1	BAALC antisense RNA 1 [Source:HGNC Symbol;Acc:HGNC:50461]	1.0555	0.956807	0.00139436	0.00520185	Up-regulated
ENSG00000176054	RPL23P2	ribosomal protein L23 pseudogene 2 [Source:HGNC Symbol;Acc:HGNC:10324]	-1.03672	0.57704	0.00140323	0.00523278	Down-regulated
ENSG00000246203	0	novel pseudogene	-1.7181	-1.32324	0.00141035	0.00525391	Down-regulated
ENSG00000125787	GNRH2	gonadotropin releasing hormone 2 [Source:HGNC Symbol;Acc:HGNC:4420]	1.10081	2.88414	0.00142236	0.00528881	Up-regulated
ENSG00000135077	HAVCR2	hepatitis A virus cellular receptor 2 [Source:HGNC Symbol;Acc:HGNC:18437]	-1.35103	-0.185979	0.00142425	0.00529319	Down-regulated
ENSG00000258591	PPIAP4	peptidylprolyl isomerase A pseudogene 4 [Source:HGNC Symbol;Acc:HGNC:19935]	-1.66106	-1.13115	0.00144282	0.00535499	Down-regulated
ENSG00000276603	0	novel transcript, sense intronic to BLCAP	-1.10216	0.213153	0.00145292	0.00538584	Down-regulated
ENSG00000187486	KCNJ11	potassium inwardly rectifying channel subfamily J member 11 [Source:HGNC Symbol;Acc:HGNC:6257]	1.04463	0.289802	0.00145683	0.00539811	Up-regulated
ENSG00000136574	GATA4	GATA binding protein 4 [Source:HGNC Symbol;Acc:HGNC:4173]	1.77065	0.529693	0.00146088	0.0054098	Up-regulated
ENSG00000289173	0	novel transcript	-2.61214	-1.70854	0.00146783	0.00543216	Down-regulated
ENSG00000163915	IGF2BP2-AS1	IGF2BP2 antisense RNA 1 [Source:HGNC Symbol;Acc:HGNC:32674]	1.01749	0.500155	0.00147438	0.00545307	Up-regulated
ENSG00000103269	RHBDL1	rhomboid like 1 [Source:HGNC Symbol;Acc:HGNC:10007]	-1.32227	0.504126	0.00148099	0.00547304	Down-regulated
ENSG00000204872	NAT8B	N-acetyltransferase 8B (putative, gene/pseudogene) [Source:HGNC Symbol;Acc:HGNC:30235]	2.33609	-0.0677162	0.00148733	0.00549365	Up-regulated
ENSG00000134874	DZIP1	DAZ interacting zinc finger protein 1 [Source:HGNC Symbol;Acc:HGNC:20908]	-1.09945	0.399272	0.00149241	0.00550733	Down-regulated
ENSG00000207205	RNVU1-15	RNA, variant U1 small nuclear 15 [Source:HGNC Symbol;Acc:HGNC:48320]	-1.52782	-1.29468	0.00150937	0.00555603	Down-regulated
ENSG00000137745	MMP13	matrix metallopeptidase 13 [Source:HGNC Symbol;Acc:HGNC:7159]	-2.0441	-1.50784	0.00151361	0.00556891	Down-regulated
ENSG00000049192	ADAMTS6	ADAM metallopeptidase with thrombospondin type 1 motif 6 [Source:HGNC Symbol;Acc:HGNC:222]	-1.37904	0.362698	0.0015141	0.00556918	Down-regulated
ENSG00000145217	SLC26A1	solute carrier family 26 member 1 [Source:HGNC Symbol;Acc:HGNC:10993]	1.23484	1.94471	0.00151444	0.00556927	Up-regulated
ENSG00000270956	0	novel transcript, antisense to TTN	2.29748	-1.2874	0.00151517	0.00557086	Up-regulated
ENSG00000139174	PRICKLE1	prickle planar cell polarity protein 1 [Source:HGNC Symbol;Acc:HGNC:17019]	-1.02104	1.33964	0.00155869	0.00570182	Down-regulated
ENSG00000274685	0	novel transcript	-1.08265	-0.513512	0.00155933	0.00570204	Down-regulated
ENSG00000165471	MBL2	mannose binding lectin 2 [Source:HGNC Symbol;Acc:HGNC:6922]	-1.11552	-0.27505	0.00158355	0.00578105	Down-regulated
ENSG00000257704	INAFM1	InaF motif containing 1 [Source:HGNC Symbol;Acc:HGNC:27406]	-1.21679	0.684615	0.00159669	0.0058208	Down-regulated
ENSG00000248050	0	novel transcript, antisense to SYBU	-1.95396	-2.01865	0.00161013	0.00586034	Down-regulated
ENSG00000147119	CHST7	carbohydrate sulfotransferase 7 [Source:HGNC Symbol;Acc:HGNC:13817]	-1.14301	-0.0488675	0.00161128	0.00586333	Down-regulated
ENSG00000164287	CDC20B	cell division cycle 20B [Source:HGNC Symbol;Acc:HGNC:24222]	3.21641	-0.173487	0.00161885	0.00588733	Up-regulated
ENSG00000275484	0	novel transcript	-1.16942	-0.635055	0.0016248	0.0059042	Down-regulated
ENSG00000260903	XKR7	XK related 7 [Source:HGNC Symbol;Acc:HGNC:23062]	-1.6179	-1.16354	0.00164747	0.00597576	Down-regulated
ENSG00000265451	CLASP1-AS1	CLASP1 antisense RNA 1 [Source:HGNC Symbol;Acc:HGNC:55328]	-1.49857	-0.296473	0.00165078	0.00598538	Down-regulated
ENSG00000206028	0	novel transcript	-2.25926	-1.76968	0.00165768	0.00599872	Down-regulated
ENSG00000226856	THORLNC	testis associated oncogenic lncRNA [Source:HGNC Symbol;Acc:HGNC:53788]	1.21022	0.329175	0.00167212	0.00604333	Up-regulated
ENSG00000253848	RBM12B-DT	RBM12B divergent transcript [Source:HGNC Symbol;Acc:HGNC:55529]	-1.8973	-1.82296	0.00167255	0.00604369	Down-regulated
ENSG00000177494	ZBED2	zinc finger BED-type containing 2 [Source:HGNC Symbol;Acc:HGNC:20710]	-1.73621	-1.64957	0.00167562	0.00605355	Down-regulated
ENSG00000124116	WFDC3	WAP four-disulfide core domain 3 [Source:HGNC Symbol;Acc:HGNC:15957]	-1.949	-1.40201	0.00170495	0.00614232	Down-regulated
ENSG00000170296	GABARAP	GABA type A receptor-associated protein [Source:HGNC Symbol;Acc:HGNC:4067]	-1.01831	0.574927	0.00171148	0.00616214	Down-regulated
ENSG00000105369	CD79A	CD79a molecule [Source:HGNC Symbol;Acc:HGNC:1698]	-1.57146	-1.1224	0.00172268	0.00619506	Down-regulated
ENSG00000286369	0	novel transcript	-1.13799	0.19993	0.00172537	0.00620351	Down-regulated
ENSG00000112245	PTP4A1	protein tyrosine phosphatase 4A1 [Source:HGNC Symbol;Acc:HGNC:9634]	1.33871	1.03421	0.00173393	0.00622931	Up-regulated
ENSG00000261360	OTULIN-DT	OTULIN divergent transcript [Source:HGNC Symbol;Acc:HGNC:55368]	-1.08599	0.641565	0.00173582	0.00623364	Down-regulated
ENSG00000170430	MGMT	O-6-methylguanine-DNA methyltransferase [Source:HGNC Symbol;Acc:HGNC:7059]	1.02537	3.52873	0.00173699	0.00623658	Up-regulated
ENSG00000272277	0	novel transcript, antisense to RIPK1	-1.27727	-0.276571	0.00173825	0.00623865	Down-regulated
ENSG00000170231	FABP6	fatty acid binding protein 6 [Source:HGNC Symbol;Acc:HGNC:3561]	1.50075	-0.174581	0.00175275	0.00628192	Up-regulated
ENSG00000255224	0	TEC	-1.5181	-0.92624	0.00175669	0.00628981	Down-regulated
ENSG00000250133	HOXC-AS2	HOXC cluster antisense RNA 2 [Source:HGNC Symbol;Acc:HGNC:43750]	-1.44884	-1.29735	0.00175839	0.00629464	Down-regulated
ENSG00000153292	ADGRF1	adhesion G protein-coupled receptor F1 [Source:HGNC Symbol;Acc:HGNC:18990]	1.24991	0.0628268	0.00176581	0.0063162	Up-regulated
ENSG00000230316	FEZF1-AS1	FEZF1 antisense RNA 1 [Source:HGNC Symbol;Acc:HGNC:41001]	-1.7916	-1.22044	0.00177459	0.00634509	Down-regulated
ENSG00000234763	0	novel transcript	-1.63054	-1.5265	0.00178747	0.00638483	Down-regulated
ENSG00000271983	0	novel transcript	-1.05529	-0.671833	0.0017945	0.00640359	Down-regulated
ENSG00000223547	ZNF844	zinc finger protein 844 [Source:HGNC Symbol;Acc:HGNC:25932]	-1.00107	0.0229121	0.00180413	0.0064278	Down-regulated
ENSG00000280040	0	novel transcript	1.0981	0.394551	0.00181231	0.00645312	Up-regulated
ENSG00000204381	LAYN	layilin [Source:HGNC Symbol;Acc:HGNC:29471]	-1.13087	0.400662	0.00182556	0.00649775	Down-regulated
ENSG00000168209	DDIT4	DNA damage inducible transcript 4 [Source:HGNC Symbol;Acc:HGNC:24944]	-1.02529	4.11911	0.00183543	0.00652644	Down-regulated
ENSG00000283526	PRRT1B	proline rich transmembrane protein 1B [Source:HGNC Symbol;Acc:HGNC:53642]	1.6587	-0.316154	0.00184243	0.00654876	Up-regulated
ENSG00000248319	LINC02275	long intergenic non-protein coding RNA 2275 [Source:HGNC Symbol;Acc:HGNC:53191]	1.13647	0.879001	0.00184701	0.00656377	Up-regulated
ENSG00000163794	UCN	urocortin [Source:HGNC Symbol;Acc:HGNC:12516]	-1.97346	-1.31692	0.00186104	0.00660971	Down-regulated
ENSG00000284727	0	RNA binding protein, fox-1 homolog (C. elegans) 1 (RBFOX1) pseudogene	1.22828	0.833255	0.00186242	0.00661201	Up-regulated
ENSG00000263884	THOC1-DT	THOC1 divergent transcript [Source:HGNC Symbol;Acc:HGNC:55334]	-1.75424	-0.0611993	0.00187105	0.00663557	Down-regulated
ENSG00000285693	0	Novel transcript	-1.38731	-0.967169	0.00188048	0.00666254	Down-regulated
ENSG00000259659	0	novel transcript	-1.91616	-1.71433	0.00188151	0.00666408	Down-regulated
ENSG00000069482	GAL	galanin and GMAP prepropeptide [Source:HGNC Symbol;Acc:HGNC:4114]	-1.58579	-0.731544	0.00188755	0.00668154	Down-regulated
ENSG00000105137	SYDE1	synapse defective Rho GTPase homolog 1 [Source:HGNC Symbol;Acc:HGNC:25824]	-1.07241	0.190059	0.00188856	0.00668379	Down-regulated
ENSG00000176919	C8G	complement C8 gamma chain [Source:HGNC Symbol;Acc:HGNC:1354]	-1.91893	-1.66295	0.00188988	0.00668716	Down-regulated
ENSG00000278627	0	novel transcript, antisense to EPX	-1.24325	0.244746	0.00193842	0.00683079	Down-regulated
ENSG00000006071	ABCC8	ATP binding cassette subfamily C member 8 [Source:HGNC Symbol;Acc:HGNC:59]	-1.80349	-0.693914	0.00195905	0.00689812	Down-regulated
ENSG00000204625	HCG9	HLA complex group 9 [Source:HGNC Symbol;Acc:HGNC:21243]	-1.97172	-1.94191	0.00196337	0.00690804	Down-regulated
ENSG00000127955	GNAI1	G protein subunit alpha i1 [Source:HGNC Symbol;Acc:HGNC:4384]	-1.65359	-0.239844	0.00198369	0.00696529	Down-regulated
ENSG00000010030	ETV7	ETS variant transcription factor 7 [Source:HGNC Symbol;Acc:HGNC:18160]	1.33675	0.366139	0.00198504	0.00696789	Up-regulated
ENSG00000285649	0	novel transcript, antisense to DPH2 and ATP6V0B	-2.05143	-2.19035	0.00200139	0.00700985	Down-regulated
ENSG00000138061	CYP1B1	cytochrome P450 family 1 subfamily B member 1 [Source:HGNC Symbol;Acc:HGNC:2597]	-1.19432	0.109055	0.00201563	0.00705335	Down-regulated
ENSG00000289602	0	novel transcript	-1.42002	-0.464038	0.00202263	0.00707508	Down-regulated
ENSG00000268069	0	novel transcript, antisense to HDAC7	1.05985	0.357991	0.00203116	0.00710217	Up-regulated
ENSG00000163075	CFAP221	cilia and flagella associated protein 221 [Source:HGNC Symbol;Acc:HGNC:33720]	1.48617	0.680072	0.00203673	0.0071134	Up-regulated
ENSG00000125740	FOSB	FosB proto-oncogene, AP-1 transcription factor subunit [Source:HGNC Symbol;Acc:HGNC:3797]	-2.50927	4.70822	0.00207241	0.0072223	Down-regulated
ENSG00000256751	PLBD1-AS1	PLBD1 antisense RNA 1 [Source:HGNC Symbol;Acc:HGNC:51143]	1.56557	-0.926513	0.00207664	0.0072332	Up-regulated
ENSG00000212195	U3	Small nucleolar RNA U3 [Source:RFAM;Acc:RF00012]	-1.80743	-1.57772	0.00209455	0.00728096	Down-regulated
ENSG00000280693	SH3PXD2A-AS1	SH3PXD2A antisense RNA 1 [Source:HGNC Symbol;Acc:HGNC:45242]	-1.64929	-1.65993	0.00209521	0.00728096	Down-regulated
ENSG00000236529	0	novel transcript	-1.12015	-0.651248	0.00211619	0.00734639	Down-regulated
ENSG00000110375	UPK2	uroplakin 2 [Source:HGNC Symbol;Acc:HGNC:12579]	-1.03834	0.87477	0.00212443	0.00736838	Down-regulated
ENSG00000258315	C17orf49	chromosome 17 open reading frame 49 [Source:HGNC Symbol;Acc:HGNC:28737]	-1.23918	-0.526835	0.00212847	0.00737672	Down-regulated
ENSG00000260278	BMP2K-DT	BMP2K divergent transcript [Source:HGNC Symbol;Acc:HGNC:55396]	-2.2739	-1.56748	0.00215934	0.00746797	Down-regulated
ENSG00000105479	ODAD1	outer dynein arm docking complex subunit 1 [Source:HGNC Symbol;Acc:HGNC:26560]	-1.5724	-0.928059	0.00217115	0.00749876	Down-regulated
ENSG00000273723	SUGT1-DT	SUGT1 divergent transcript [Source:HGNC Symbol;Acc:HGNC:54809]	-1.0989	0.710942	0.00217355	0.00750275	Down-regulated
ENSG00000167377	ZNF23	zinc finger protein 23 [Source:HGNC Symbol;Acc:HGNC:13023]	-1.03964	0.0467756	0.00217901	0.00751727	Down-regulated
ENSG00000286138	0	novel transcript	-1.18738	0.233139	0.00219314	0.0075588	Down-regulated
ENSG00000101443	WFDC2	WAP four-disulfide core domain 2 [Source:HGNC Symbol;Acc:HGNC:15939]	-1.09297	1.7655	0.00220377	0.00759111	Down-regulated
ENSG00000280027	0	novel transcript	1.51709	-1.17754	0.0022057	0.0075957	Up-regulated
ENSG00000186910	SERPINA11	serpin family A member 11 [Source:HGNC Symbol;Acc:HGNC:19193]	1.83377	-1.43414	0.00220853	0.00760168	Up-regulated
ENSG00000248265	FLJ12825	uncharacterized LOC440101 [Source:NCBI gene (formerly Entrezgene);Acc:440101]	2.29726	-0.815834	0.00225753	0.00775409	Up-regulated
ENSG00000166984	TCP10L2	t-complex 10 like 2, pseudogene [Source:HGNC Symbol;Acc:HGNC:21254]	1.1204	0.192481	0.0022608	0.00776383	Up-regulated
ENSG00000286891	0	novel transcript	4.56058	-0.752714	0.00226796	0.00778174	Up-regulated
ENSG00000285641	0	novel protein	-1.76173	-1.4051	0.00227159	0.00778904	Down-regulated
ENSG00000182511	FES	FES proto-oncogene, tyrosine kinase [Source:HGNC Symbol;Acc:HGNC:3657]	-1.56194	-1.62499	0.00227922	0.00780927	Down-regulated
ENSG00000259439	LINC01833	long intergenic non-protein coding RNA 1833 [Source:HGNC Symbol;Acc:HGNC:52644]	1.49416	-1.00445	0.00228025	0.00781035	Up-regulated
ENSG00000286431	0	novel transcript	-2.20548	-1.28203	0.00228484	0.00782261	Down-regulated
ENSG00000253196	0	novel transcript	1.08466	1.12442	0.00231904	0.00792168	Up-regulated
ENSG00000237436	CAMTA1-DT	CAMTA1 divergent transcript [Source:HGNC Symbol;Acc:HGNC:53020]	-1.51596	-1.09003	0.00232497	0.00793743	Down-regulated
ENSG00000102349	KLF8	Kruppel like factor 8 [Source:HGNC Symbol;Acc:HGNC:6351]	-1.20821	1.05891	0.00232598	0.00793937	Down-regulated
ENSG00000185201	IFITM2	interferon induced transmembrane protein 2 [Source:HGNC Symbol;Acc:HGNC:5413]	-1.06616	1.54302	0.00232843	0.00794622	Down-regulated
ENSG00000275401	0	novel transcript	-1.44991	-0.916263	0.00232955	0.00794856	Down-regulated
ENSG00000197837	H4-16	H4 histone 16 [Source:HGNC Symbol;Acc:HGNC:20510]	-1.35178	1.29033	0.00233654	0.00796789	Down-regulated
ENSG00000228141	0	novel pseudogene	-2.422	-2.4268	0.0023453	0.00799324	Down-regulated
ENSG00000114013	CD86	CD86 molecule [Source:HGNC Symbol;Acc:HGNC:1705]	-1.35902	-1.12845	0.00234759	0.00799801	Down-regulated
ENSG00000197816	CCDC180	coiled-coil domain containing 180 [Source:HGNC Symbol;Acc:HGNC:29303]	1.5087	1.06427	0.0023641	0.00804667	Up-regulated
ENSG00000249375	CASC11	cancer susceptibility 11 [Source:HGNC Symbol;Acc:HGNC:48939]	-1.46384	-1.71424	0.00239785	0.00814925	Down-regulated
ENSG00000217275	0	ribosomal protein S10 (RPS10) pseudogene	-1.34662	0.0994569	0.00240454	0.00816891	Down-regulated
ENSG00000260796	0	novel transcript, antisense to ATXN2L	-1.76539	-1.21175	0.00241005	0.00818121	Down-regulated
ENSG00000135749	PCNX2	pecanex 2 [Source:HGNC Symbol;Acc:HGNC:8736]	-1.22156	1.52643	0.0024228	0.00821093	Down-regulated
ENSG00000264278	ZNF236-DT	ZNF236 divergent transcript [Source:HGNC Symbol;Acc:HGNC:53779]	-1.7826	-1.9424	0.00242282	0.00821093	Down-regulated
ENSG00000144031	ANKRD53	ankyrin repeat domain 53 [Source:HGNC Symbol;Acc:HGNC:25691]	-1.4585	-1.82249	0.00243464	0.00823865	Down-regulated
ENSG00000123453	SARDH	sarcosine dehydrogenase [Source:HGNC Symbol;Acc:HGNC:10536]	2.30641	0.999897	0.00244161	0.00825758	Up-regulated
ENSG00000272054	0	novel transcript	-1.01367	0.34869	0.00244257	0.00825928	Down-regulated
ENSG00000258813	RBM25-AS1	RBM25 antisense RNA 1 [Source:HGNC Symbol;Acc:HGNC:55437]	-1.60651	-1.1263	0.0024437	0.00826155	Down-regulated
ENSG00000272434	0	novel transcript, antisense to IMPDH2 and QRICH1	-1.89341	-1.41999	0.00245385	0.00828977	Down-regulated
ENSG00000271824	SMIM32	small integral membrane protein 32 [Source:HGNC Symbol;Acc:HGNC:53640]	1.5885	-0.647202	0.00245623	0.0082946	Up-regulated
ENSG00000254246	0	novel transcript	1.46224	0.506685	0.00246423	0.00831538	Up-regulated
ENSG00000162344	FGF19	fibroblast growth factor 19 [Source:HGNC Symbol;Acc:HGNC:3675]	1.01604	0.708416	0.00246918	0.00832777	Up-regulated
ENSG00000265148	TSPOAP1-AS1	TSPOAP1, SUPT4H1 and RNF43 antisense RNA 1 [Source:HGNC Symbol;Acc:HGNC:44148]	-1.74346	-1.02365	0.00249656	0.00840722	Down-regulated
ENSG00000259527	LINC00052	long intergenic non-protein coding RNA 52 [Source:HGNC Symbol;Acc:HGNC:26455]	-1.15439	-0.691357	0.00251777	0.008466	Down-regulated
ENSG00000186265	BTLA	B and T lymphocyte associated [Source:HGNC Symbol;Acc:HGNC:21087]	-2.46822	-2.33067	0.00254391	0.00854117	Down-regulated
ENSG00000288835	0	novel transcript	-2.30285	-1.54588	0.00255662	0.00857599	Down-regulated
ENSG00000196946	ZNF705A	zinc finger protein 705A [Source:HGNC Symbol;Acc:HGNC:32281]	-2.18833	-2.44404	0.00255665	0.00857599	Down-regulated
ENSG00000139537	CCDC65	coiled-coil domain containing 65 [Source:HGNC Symbol;Acc:HGNC:29937]	1.17917	0.591029	0.00256287	0.00859525	Up-regulated
ENSG00000121753	ADGRB2	adhesion G protein-coupled receptor B2 [Source:HGNC Symbol;Acc:HGNC:944]	1.15153	1.35639	0.0026078	0.00872325	Up-regulated
ENSG00000270673	YTHDF3-DT	YTHDF3 divergent transcript [Source:HGNC Symbol;Acc:HGNC:48728]	-1.18801	-1.08138	0.00262641	0.00877088	Down-regulated
ENSG00000196747	H2AC13	H2A clustered histone 13 [Source:HGNC Symbol;Acc:HGNC:4725]	-1.85565	-1.53858	0.0026274	0.00877256	Down-regulated
ENSG00000156427	FGF18	fibroblast growth factor 18 [Source:HGNC Symbol;Acc:HGNC:3674]	-1.3255	-1.04735	0.00263414	0.00879182	Down-regulated
ENSG00000253931	0	novel transcript	-2.19311	-1.6093	0.00264062	0.00880857	Down-regulated
ENSG00000163606	CD200R1	CD200 receptor 1 [Source:HGNC Symbol;Acc:HGNC:24235]	-1.89142	-1.88277	0.00264498	0.0088153	Down-regulated
ENSG00000185697	MYBL1	MYB proto-oncogene like 1 [Source:HGNC Symbol;Acc:HGNC:7547]	-1.14205	-0.00266738	0.00264508	0.0088153	Down-regulated
ENSG00000212443	SNORA53	small nucleolar RNA, H/ACA box 53 [Source:HGNC Symbol;Acc:HGNC:32646]	-1.86081	-1.53398	0.0026502	0.00883073	Down-regulated
ENSG00000260597	0	novel transcript	-1.11625	0.0824116	0.00266162	0.00886063	Down-regulated
ENSG00000249863	0	synaptotagmin binding, cytoplasmic RNA interacting protein (SYNCRIP) pseudogene	1.6303	-0.689884	0.002667	0.00887688	Up-regulated
ENSG00000260317	0	novel transcript	-1.426	0.0473821	0.00268567	0.00892588	Down-regulated
ENSG00000115525	ST3GAL5	ST3 beta-galactoside alpha-2,3-sialyltransferase 5 [Source:HGNC Symbol;Acc:HGNC:10872]	1.35771	0.666694	0.00269023	0.00893773	Up-regulated
ENSG00000175318	GRAMD2A	GRAM domain containing 2A [Source:HGNC Symbol;Acc:HGNC:27287]	-1.06824	2.48003	0.0026922	0.00894264	Down-regulated
ENSG00000004838	ZMYND10	zinc finger MYND-type containing 10 [Source:HGNC Symbol;Acc:HGNC:19412]	-1.63705	-0.971596	0.00269764	0.00895908	Down-regulated
ENSG00000283959	0	novel transcript	-1.15063	-0.508368	0.00270708	0.00898382	Down-regulated
ENSG00000270277	0	novel transcript, antisense to titin	1.54311	-0.685259	0.00271735	0.00901125	Up-regulated
ENSG00000222612	RNU2-52P	RNA, U2 small nuclear 52, pseudogene [Source:HGNC Symbol;Acc:HGNC:48545]	1.51687	0.474251	0.00272771	0.00904263	Up-regulated
ENSG00000255198	SNHG9	small nucleolar RNA host gene 9 [Source:HGNC Symbol;Acc:HGNC:33102]	-1.30794	-0.721376	0.00273548	0.0090664	Down-regulated
ENSG00000261173	DNAJA2-DT	DNAJA2 divergent transcript [Source:HGNC Symbol;Acc:HGNC:55375]	-2.00375	-1.84744	0.00276188	0.00914215	Down-regulated
ENSG00000265967	0	novel transcript, antisense to ornithine decarboxylase antizyme 2 OAZ2	2.00413	-1.61174	0.00276361	0.00914619	Up-regulated
ENSG00000244945	RUFY1-AS1	RUFY1 antisense RNA 1 [Source:HGNC Symbol;Acc:HGNC:40903]	-1.73028	-0.881199	0.00277562	0.0091792	Down-regulated
ENSG00000280214	0	TEC	-1.89753	-1.42337	0.00277958	0.00918894	Down-regulated
ENSG00000254154	CRYZL2P-SEC16B	CRYZL2P-SEC16B readthrough [Source:HGNC Symbol;Acc:HGNC:53757]	1.35021	0.586766	0.00279401	0.00923157	Up-regulated
ENSG00000234327	ZNF232-AS1	ZNF232 antisense RNA 1 [Source:HGNC Symbol;Acc:HGNC:40623]	-1.29761	-0.704677	0.00279948	0.00924627	Down-regulated
ENSG00000238741	SCARNA7	small Cajal body-specific RNA 7 [Source:HGNC Symbol;Acc:HGNC:32563]	-1.78811	-0.215067	0.00280844	0.00926738	Down-regulated
ENSG00000249942	0	novel transcript	-1.44449	-1.22544	0.00282328	0.00930785	Down-regulated
ENSG00000264235	MYL12-AS1	MYL12A and MYL12B antisense RNA 1 [Source:HGNC Symbol;Acc:HGNC:55331]	-1.44431	-1.5709	0.00282862	0.00931697	Down-regulated
ENSG00000180432	CYP8B1	cytochrome P450 family 8 subfamily B member 1 [Source:HGNC Symbol;Acc:HGNC:2653]	1.67936	0.0196682	0.00285089	0.00938005	Up-regulated
ENSG00000280537	0	novel protein, SLC23A3-NHEJ1 readthrough	-1.24583	-0.299877	0.00286287	0.0094109	Down-regulated
ENSG00000280069	0	TEC	-1.62314	-1.41501	0.002864	0.00941289	Down-regulated
ENSG00000154263	ABCA10	ATP binding cassette subfamily A member 10 [Source:HGNC Symbol;Acc:HGNC:30]	1.66163	0.38228	0.00288152	0.00946013	Up-regulated
ENSG00000272829	0	novel transcript	-1.05813	-0.138647	0.0028874	0.00947772	Down-regulated
ENSG00000276952	0	novel transcript, antisense to PYGB	1.23386	0.251531	0.00288866	0.00947862	Up-regulated
ENSG00000270210	0	novel transcript	-1.05815	0.967429	0.00293328	0.00960522	Down-regulated
ENSG00000095585	BLNK	B cell linker [Source:HGNC Symbol;Acc:HGNC:14211]	1.92149	-0.214542	0.00293875	0.00962005	Up-regulated
ENSG00000212864	RNF208	ring finger protein 208 [Source:HGNC Symbol;Acc:HGNC:25420]	1.06119	1.70646	0.00293983	0.00962183	Up-regulated
ENSG00000183423	LRIT3	leucine rich repeat, Ig-like and transmembrane domains 3 [Source:HGNC Symbol;Acc:HGNC:24783]	-1.53024	-0.514964	0.00296007	0.00967932	Down-regulated
ENSG00000227544	0	novel transcript	-2.07264	-1.84914	0.00296495	0.00969176	Down-regulated
ENSG00000253948	VPS13B-DT	VPS13B divergent transcript [Source:HGNC Symbol;Acc:HGNC:54375]	-1.65469	-1.36619	0.00298583	0.00974591	Down-regulated
ENSG00000163576	EFHB	EF-hand domain family member B [Source:HGNC Symbol;Acc:HGNC:26330]	-1.40468	-1.23638	0.00300502	0.00979437	Down-regulated
ENSG00000188828	GLRA4	glycine receptor alpha 4 (pseudogene) [Source:HGNC Symbol;Acc:HGNC:31715]	1.53613	0.848721	0.00301602	0.00982314	Up-regulated
ENSG00000277728	0	novel transcript, antisense to COG1	-1.27246	-1.36702	0.00302734	0.00985469	Down-regulated
ENSG00000283045	0	novel transcript, sense intronic to GPATCH8	-1.98037	-1.51326	0.00302893	0.00985807	Down-regulated
ENSG00000274373	0	novel transcript	1.73373	-1.28978	0.00305554	0.00992681	Up-regulated
ENSG00000254842	LINC02551	long intergenic non-protein coding RNA 2551 [Source:HGNC Symbol;Acc:HGNC:53586]	-1.73196	-1.85174	0.00307807	0.00999099	Down-regulated
ENSG00000285373	LINC02478	long intergenic non-protein coding RNA 2478 [Source:HGNC Symbol;Acc:HGNC:53446]	-1.60575	-1.99049	0.00308872	0.0100202	Down-regulated
ENSG00000069122	ADGRF5	adhesion G protein-coupled receptor F5 [Source:HGNC Symbol;Acc:HGNC:19030]	2.38721	-1.50836	0.00309472	0.0100378	Up-regulated
ENSG00000154080	CHST9	carbohydrate sulfotransferase 9 [Source:HGNC Symbol;Acc:HGNC:19898]	1.25406	1.80287	0.00313476	0.0101458	Up-regulated
ENSG00000237788	0	cytokine-like nuclear factor n-pac (N-PAC) pseudogene	-1.7704	-1.44199	0.0031713	0.0102435	Down-regulated
ENSG00000125148	MT2A	metallothionein 2A [Source:HGNC Symbol;Acc:HGNC:7406]	-1.3065	0.45498	0.00317175	0.0102435	Down-regulated
ENSG00000254610	0	RNA binding protein, fox-1 homolog (C. elegans) 1 (RBFOX1) pseudogene	1.57178	-0.234054	0.00317952	0.0102637	Up-regulated
ENSG00000270977	0	leucine rich repeat containing 37 member A3 (LRRC37A3) pseudogene	1.06547	0.642297	0.00318568	0.0102749	Up-regulated
ENSG00000261359	PYCARD-AS1	PYCARD antisense RNA 1 [Source:HGNC Symbol;Acc:HGNC:45036]	-1.6902	-1.88039	0.00318576	0.0102749	Down-regulated
ENSG00000273308	0	novel transcript	-1.64906	-1.97239	0.00319041	0.0102836	Down-regulated
ENSG00000110887	DAO	D-amino acid oxidase [Source:HGNC Symbol;Acc:HGNC:2671]	1.15895	0.155069	0.00319801	0.0103044	Up-regulated
ENSG00000259984	0	novel pseudogene	-1.0934	-0.466205	0.0032385	0.0104141	Down-regulated
ENSG00000243478	AOX2P	aldehyde oxidase 2, pseudogene [Source:HGNC Symbol;Acc:HGNC:18450]	-1.08035	-0.201044	0.00324229	0.0104229	Down-regulated
ENSG00000285106	0	novel transcript	-1.49415	-0.990688	0.00325247	0.0104497	Down-regulated
ENSG00000258099	ATXN2-AS	ATXN2 antisense RNA [Source:HGNC Symbol;Acc:HGNC:51838]	-1.32504	-1.10381	0.0032568	0.0104583	Down-regulated
ENSG00000179776	CDH5	cadherin 5 [Source:HGNC Symbol;Acc:HGNC:1764]	-1.27219	-0.523819	0.00327344	0.0105067	Down-regulated
ENSG00000100097	LGALS1	galectin 1 [Source:HGNC Symbol;Acc:HGNC:6561]	-1.25179	-0.414272	0.00332658	0.010654	Down-regulated
ENSG00000225833	GS1-594A7.3	uncharacterized LOC104798195 [Source:NCBI gene (formerly Entrezgene);Acc:104798195]	1.5432	0.808338	0.00333001	0.0106597	Up-regulated
ENSG00000279923	0	tec	-1.05023	-0.376596	0.00333827	0.010682	Down-regulated
ENSG00000260924	LINC01311	long intergenic non-protein coding RNA 1311 [Source:HGNC Symbol;Acc:HGNC:50503]	-1.02509	0.845994	0.00334911	0.0107134	Down-regulated
ENSG00000273445	0	novel transcript	1.3759	-0.206547	0.00334928	0.0107134	Up-regulated
ENSG00000219529	0	ribosomal protein S20 (RPS20) pseudogene	-1.78575	-1.39168	0.003364	0.0107567	Down-regulated
ENSG00000102524	TNFSF13B	TNF superfamily member 13b [Source:HGNC Symbol;Acc:HGNC:11929]	-1.14019	-0.445448	0.0033663	0.0107599	Down-regulated
ENSG00000104140	RHOV	ras homolog family member V [Source:HGNC Symbol;Acc:HGNC:18313]	-1.12587	0.238059	0.00336739	0.0107599	Down-regulated
ENSG00000138435	CHRNA1	cholinergic receptor nicotinic alpha 1 subunit [Source:HGNC Symbol;Acc:HGNC:1955]	1.32262	0.32758	0.00341023	0.0108699	Up-regulated
ENSG00000220161	LINC02076	long intergenic non-protein coding RNA 2076 [Source:HGNC Symbol;Acc:HGNC:52924]	-1.83523	-1.91063	0.00344063	0.0109475	Down-regulated
ENSG00000277218	0	novel transcript	-1.3296	-1.2839	0.0034498	0.0109728	Down-regulated
ENSG00000121005	CRISPLD1	cysteine rich secretory protein LCCL domain containing 1 [Source:HGNC Symbol;Acc:HGNC:18206]	-1.13247	0.237765	0.00346815	0.0110214	Down-regulated
ENSG00000139187	KLRG1	killer cell lectin like receptor G1 [Source:HGNC Symbol;Acc:HGNC:6380]	1.64077	-0.157263	0.00347832	0.0110499	Up-regulated
ENSG00000137673	MMP7	matrix metallopeptidase 7 [Source:HGNC Symbol;Acc:HGNC:7174]	-1.47234	-1.31712	0.00358837	0.0113436	Down-regulated
ENSG00000268745	0	novel transcript, antisense to USP49	-1.81205	-1.81966	0.00361703	0.0114222	Down-regulated
ENSG00000121236	TRIM6	tripartite motif containing 6 [Source:HGNC Symbol;Acc:HGNC:16277]	1.16461	-0.252213	0.00363571	0.0114656	Up-regulated
ENSG00000270100	0	novel transcript	1.68572	-0.123831	0.00364587	0.0114912	Up-regulated
ENSG00000103196	CRISPLD2	cysteine rich secretory protein LCCL domain containing 2 [Source:HGNC Symbol;Acc:HGNC:25248]	-1.02376	0.580631	0.00365208	0.0115027	Down-regulated
ENSG00000179046	TRIML2	tripartite motif family like 2 [Source:HGNC Symbol;Acc:HGNC:26378]	-1.02005	1.25827	0.00366394	0.011524	Down-regulated
ENSG00000279080	0	novel transcript, antisense to PLA2G6	-1.19606	-1.06853	0.00366695	0.0115314	Down-regulated
ENSG00000242950	ERVW-1	endogenous retrovirus group W member 1, envelope [Source:HGNC Symbol;Acc:HGNC:13525]	-1.48059	0.803043	0.00367453	0.0115513	Down-regulated
ENSG00000235290	HLA-W	major histocompatibility complex, class I, W (pseudogene) [Source:HGNC Symbol;Acc:HGNC:23425]	-2.19555	-2.44154	0.00369689	0.0116115	Down-regulated
ENSG00000287979	0	novel transcript	-1.86282	-2.31802	0.00370195	0.0116239	Down-regulated
ENSG00000230537	0	novel transcript	-1.6581	-0.937304	0.00372302	0.0116732	Down-regulated
ENSG00000283849	0	novel transcript, antisense CSRNP1	-2.16729	-2.19874	0.0037546	0.0117559	Down-regulated
ENSG00000252755	RNU6-703P	RNA, U6 small nuclear 703, pseudogene [Source:HGNC Symbol;Acc:HGNC:47666]	-1.7047	-1.86341	0.00379701	0.0118643	Down-regulated
ENSG00000272081	FCHO2-DT	FCHO2 divergent transcript [Source:HGNC Symbol;Acc:HGNC:55232]	-1.303	-1.43002	0.00380588	0.0118876	Down-regulated
ENSG00000277767	0	novel transcript	-1.02389	0.740492	0.00383366	0.011964	Down-regulated
ENSG00000238249	HMGN2P17	high mobility group nucleosomal binding domain 2 pseudogene 17 [Source:HGNC Symbol;Acc:HGNC:39381]	-2.18143	-2.2841	0.00384161	0.0119806	Down-regulated
ENSG00000259438	MAPK6-DT	MAPK6 divergent transcript [Source:HGNC Symbol;Acc:HGNC:53900]	-2.00324	-1.45796	0.00384786	0.011998	Down-regulated
ENSG00000233791	LINC01136	long intergenic non-protein coding RNA 1136 [Source:HGNC Symbol;Acc:HGNC:49452]	-1.33128	-0.480569	0.00385732	0.012013	Down-regulated
ENSG00000254554	ADM-DT	ADM divergent transcript [Source:HGNC Symbol;Acc:HGNC:55516]	-1.42472	-1.15084	0.00390863	0.0121518	Down-regulated
ENSG00000289552	0	novel transcript	-1.57048	-1.61786	0.00391061	0.0121559	Down-regulated
ENSG00000178146	GK4P	glycerol kinase 4 pseudogene [Source:HGNC Symbol;Acc:HGNC:4295]	1.52813	-0.927851	0.00391755	0.0121753	Up-regulated
ENSG00000231028	LINC00271	long intergenic non-protein coding RNA 271 [Source:HGNC Symbol;Acc:HGNC:32526]	-1.67472	-0.804355	0.00392564	0.0121963	Down-regulated
ENSG00000143248	RGS5	regulator of G protein signaling 5 [Source:HGNC Symbol;Acc:HGNC:10001]	-1.02262	1.7514	0.00395033	0.0122604	Down-regulated
ENSG00000239542	RN7SL399P	RNA, 7SL, cytoplasmic 399, pseudogene [Source:HGNC Symbol;Acc:HGNC:46415]	-2.14963	-1.94076	0.00397532	0.0123316	Down-regulated
ENSG00000261857	MIA	MIA SH3 domain containing [Source:HGNC Symbol;Acc:HGNC:7076]	-1.94906	-1.60435	0.00397723	0.0123332	Down-regulated
ENSG00000276058	STMN1P1	stathmin 1 pseudogene 1 [Source:HGNC Symbol;Acc:HGNC:44062]	-1.31552	-1.50302	0.00398472	0.0123459	Down-regulated
ENSG00000260167	0	novel transcript, antisense to ZNF689	-1.68519	-1.91053	0.003987	0.0123487	Down-regulated
ENSG00000249715	FER1L5	fer-1 like family member 5 [Source:HGNC Symbol;Acc:HGNC:19044]	-2.13601	-1.3348	0.00401562	0.0124246	Down-regulated
ENSG00000131016	AKAP12	A-kinase anchoring protein 12 [Source:HGNC Symbol;Acc:HGNC:370]	-1.07317	0.6574	0.00402523	0.0124521	Down-regulated
ENSG00000258982	0	novel transcript, antisense to YY1	-1.80025	-1.98161	0.00409234	0.0126247	Down-regulated
ENSG00000256981	0	taste receptor, type 2, member 18 pseudogene	-1.84308	-1.83477	0.00411736	0.0126872	Down-regulated
ENSG00000229672	0	novel transcript	-1.31214	-1.77959	0.00413686	0.0127386	Down-regulated
ENSG00000170909	OSCAR	osteoclast associated Ig-like receptor [Source:HGNC Symbol;Acc:HGNC:29960]	-1.50879	-1.76505	0.00413917	0.0127435	Down-regulated
ENSG00000079557	AFM	afamin [Source:HGNC Symbol;Acc:HGNC:316]	1.59388	-0.935497	0.00414404	0.0127498	Up-regulated
ENSG00000288610	0	novel transcript	1.65377	-0.833935	0.00414955	0.0127646	Up-regulated
ENSG00000203266	0	novel transcript	-1.80637	-1.27983	0.0041553	0.0127757	Down-regulated
ENSG00000161298	ZNF382	zinc finger protein 382 [Source:HGNC Symbol;Acc:HGNC:17409]	-1.08859	-0.0844106	0.0041612	0.0127906	Down-regulated
ENSG00000236137	0	novel transcript	2.45693	-1.42563	0.00416156	0.0127906	Up-regulated
ENSG00000235545	0	novel transcript	1.11945	-0.0740488	0.00417365	0.0128256	Up-regulated
ENSG00000258643	BCL2L2-PABPN1	BCL2L2-PABPN1 readthrough [Source:HGNC Symbol;Acc:HGNC:42959]	-1.2469	-0.646326	0.00421598	0.0129381	Down-regulated
ENSG00000163687	DNASE1L3	deoxyribonuclease 1 like 3 [Source:HGNC Symbol;Acc:HGNC:2959]	1.31509	-0.154598	0.0042212	0.0129513	Up-regulated
ENSG00000172382	PRSS27	serine protease 27 [Source:HGNC Symbol;Acc:HGNC:15475]	-1.47905	-1.59432	0.00422174	0.0129513	Down-regulated
ENSG00000227467	LINC01537	long intergenic non-protein coding RNA 1537 [Source:HGNC Symbol;Acc:HGNC:51301]	-1.20632	-1.36573	0.00422257	0.0129517	Down-regulated
ENSG00000274678	0	novel transcript	-1.6943	-1.72815	0.00422691	0.0129606	Down-regulated
ENSG00000174928	C3orf33	chromosome 3 open reading frame 33 [Source:HGNC Symbol;Acc:HGNC:26434]	1.24616	-0.141917	0.00424513	0.0130054	Up-regulated
ENSG00000145040	UCN2	urocortin 2 [Source:HGNC Symbol;Acc:HGNC:18414]	-1.06554	-0.0520912	0.0042525	0.0130249	Down-regulated
ENSG00000143028	SYPL2	synaptophysin like 2 [Source:HGNC Symbol;Acc:HGNC:27638]	-1.40481	-1.14228	0.00427553	0.0130808	Down-regulated
ENSG00000280422	0	TEC	-1.14592	0.0673146	0.0042779	0.0130859	Down-regulated
ENSG00000170370	EMX2	empty spiracles homeobox 2 [Source:HGNC Symbol;Acc:HGNC:3341]	-1.01654	-0.723875	0.00431925	0.0131993	Down-regulated
ENSG00000261617	LINC02177	long intergenic non-protein coding RNA 2177 [Source:HGNC Symbol;Acc:HGNC:53039]	2.96768	0.146228	0.00433977	0.0132459	Up-regulated
ENSG00000272843	0	novel transcript, antisense to POM121	-1.47117	-1.14432	0.00435447	0.0132818	Down-regulated
ENSG00000280623	PCAT14	prostate cancer associated transcript 14 [Source:HGNC Symbol;Acc:HGNC:48977]	-1.24222	0.518423	0.00436442	0.013301	Down-regulated
ENSG00000280376	0	novel transcript	-1.52616	-2.01518	0.00438935	0.0133566	Down-regulated
ENSG00000233124	LINC00456	long intergenic non-protein coding RNA 456 [Source:HGNC Symbol;Acc:HGNC:42804]	-1.22976	-0.1981	0.00439945	0.0133851	Down-regulated
ENSG00000237017	0	novel transcript	-1.04201	0.0697059	0.00440484	0.013397	Down-regulated
ENSG00000139971	ARMH4	armadillo like helical domain containing 4 [Source:HGNC Symbol;Acc:HGNC:19846]	-1.92607	-1.41018	0.0044104	0.0134116	Down-regulated
ENSG00000171840	NINJ2	ninjurin 2 [Source:HGNC Symbol;Acc:HGNC:7825]	2.0119	-1.03934	0.00442031	0.0134373	Up-regulated
ENSG00000180245	RRH	retinal pigment epithelium-derived rhodopsin homolog [Source:HGNC Symbol;Acc:HGNC:10450]	-1.63966	-1.53731	0.00445585	0.0135294	Down-regulated
ENSG00000167800	TBX10	T-box transcription factor 10 [Source:HGNC Symbol;Acc:HGNC:11593]	2.10477	-1.0664	0.0044812	0.0135954	Up-regulated
ENSG00000162391	FAM151A	family with sequence similarity 151 member A [Source:HGNC Symbol;Acc:HGNC:25032]	1.06272	3.44933	0.00448559	0.0136036	Up-regulated
ENSG00000028277	POU2F2	POU class 2 homeobox 2 [Source:HGNC Symbol;Acc:HGNC:9213]	-1.27007	1.24205	0.00451167	0.013669	Down-regulated
ENSG00000272906	0	novel transcript, antisense to TOR1AIP1	-1.04657	0.0898842	0.00454553	0.0137508	Down-regulated
ENSG00000205959	0	novel transcript	-1.22199	0.105255	0.00456154	0.01379	Down-regulated
ENSG00000271789	0	novel transcript	1.29675	-0.569688	0.00463148	0.0139617	Up-regulated
ENSG00000185271	KLHL33	kelch like family member 33 [Source:HGNC Symbol;Acc:HGNC:31952]	-1.54876	-1.47613	0.00465756	0.0140286	Down-regulated
ENSG00000140280	LYSMD2	LysM domain containing 2 [Source:HGNC Symbol;Acc:HGNC:28571]	1.289	-0.797987	0.00466908	0.0140563	Up-regulated
ENSG00000286117	0	novel transcript	1.15404	-0.177609	0.00468017	0.0140873	Up-regulated
ENSG00000166959	MS4A8	membrane spanning 4-domains A8 [Source:HGNC Symbol;Acc:HGNC:13380]	-2.31218	-1.53282	0.00472033	0.0141964	Down-regulated
ENSG00000288935	0	novel transcript	-1.24618	-0.359573	0.00472385	0.0142046	Down-regulated
ENSG00000245904	BTG1-DT	BTG1 divergent transcript [Source:HGNC Symbol;Acc:HGNC:55600]	-1.33727	-0.913006	0.00473061	0.0142225	Down-regulated
ENSG00000146021	KLHL3	kelch like family member 3 [Source:HGNC Symbol;Acc:HGNC:6354]	-2.67753	-1.71647	0.0047553	0.014292	Down-regulated
ENSG00000162526	TSSK3	testis specific serine kinase 3 [Source:HGNC Symbol;Acc:HGNC:15473]	-1.49377	-0.670649	0.00479142	0.014379	Down-regulated
ENSG00000287262	0	novel transcript	-1.12247	0.446991	0.00481235	0.0144323	Down-regulated
ENSG00000279539	0	TEC	-1.30316	-0.576795	0.00483444	0.0144937	Down-regulated
ENSG00000289065	0	novel transcript, antisense to ACYP2	-1.43373	-0.826209	0.00483959	0.014503	Down-regulated
ENSG00000183784	DOCK8-AS1	DOCK8 antisense RNA 1 [Source:HGNC Symbol;Acc:HGNC:26436]	1.07306	-0.154875	0.00487507	0.0145893	Up-regulated
ENSG00000286408	0	novel transcript	-1.04645	0.151746	0.00487522	0.0145893	Down-regulated
ENSG00000273204	0	novel transcript, antisense to EXTL2	-1.30392	-1.22537	0.00490323	0.0146575	Down-regulated
ENSG00000258458	OXA1L-DT	OXA1L divergent transcript [Source:HGNC Symbol;Acc:HGNC:55448]	-1.02518	-0.527606	0.00492391	0.0147045	Down-regulated
ENSG00000226259	GTF2H2B	general transcription factor IIH subunit 2B (pseudogene) [Source:HGNC Symbol;Acc:HGNC:31393]	-1.08458	0.178629	0.00495391	0.0147747	Down-regulated
ENSG00000260926	0	novel transcript	-1.80628	-1.80191	0.00495436	0.0147747	Down-regulated
ENSG00000288735	0	novel transcript	1.03504	-0.260473	0.00496444	0.0147974	Up-regulated
ENSG00000130748	TMEM160	transmembrane protein 160 [Source:HGNC Symbol;Acc:HGNC:26042]	1.06085	0.0103395	0.00498982	0.0148658	Up-regulated
ENSG00000267107	PCAT19	prostate cancer associated transcript 19 [Source:HGNC Symbol;Acc:HGNC:49593]	-1.4925	-1.57688	0.00502069	0.0149429	Down-regulated
ENSG00000203722	RAET1G	retinoic acid early transcript 1G [Source:HGNC Symbol;Acc:HGNC:16795]	-1.44743	-1.29473	0.0050572	0.0150367	Down-regulated
ENSG00000256940	PPP1R14B-AS1	PPP1R14B antisense RNA 1 [Source:HGNC Symbol;Acc:HGNC:54233]	-1.01081	-0.145527	0.00506402	0.015052	Down-regulated
ENSG00000243725	TTC4	tetratricopeptide repeat domain 4 [Source:HGNC Symbol;Acc:HGNC:12394]	-1.07922	-0.420011	0.00508135	0.0150911	Down-regulated
ENSG00000153291	SLC25A27	solute carrier family 25 member 27 [Source:HGNC Symbol;Acc:HGNC:21065]	-1.41736	-0.116244	0.00508807	0.0151076	Down-regulated
ENSG00000156466	GDF6	growth differentiation factor 6 [Source:HGNC Symbol;Acc:HGNC:4221]	-1.47898	-0.356469	0.00508856	0.0151076	Down-regulated
ENSG00000228952	LINC02041	long intergenic non-protein coding RNA 2041 [Source:HGNC Symbol;Acc:HGNC:52881]	1.66795	-1.25439	0.00511071	0.0151659	Up-regulated
ENSG00000137251	TINAG	tubulointerstitial nephritis antigen [Source:HGNC Symbol;Acc:HGNC:14599]	1.03009	1.02653	0.00518917	0.0153558	Up-regulated
ENSG00000272812	0	novel transcript, sense intronic to ZNF596	-1.32103	-0.662982	0.00519128	0.015357	Down-regulated
ENSG00000251000	GGCTP1	GGCT pseudogene 1 [Source:HGNC Symbol;Acc:HGNC:54609]	1.05433	-0.387983	0.00520936	0.0154055	Up-regulated
ENSG00000166073	GPR176	G protein-coupled receptor 176 [Source:HGNC Symbol;Acc:HGNC:32370]	1.49569	0.592396	0.00521974	0.0154286	Up-regulated
ENSG00000204428	LY6G5C	lymphocyte antigen 6 family member G5C [Source:HGNC Symbol;Acc:HGNC:13932]	-1.03182	-0.0255505	0.0052944	0.0156024	Down-regulated
ENSG00000154025	SLC5A10	solute carrier family 5 member 10 [Source:HGNC Symbol;Acc:HGNC:23155]	-1.5403	-1.75699	0.00529498	0.0156024	Down-regulated
ENSG00000235174	RPL39P3	ribosomal protein L39 pseudogene 3 [Source:HGNC Symbol;Acc:HGNC:21383]	-4.34412	-1.35563	0.00532118	0.0156643	Down-regulated
ENSG00000124479	NDP	norrin cystine knot growth factor NDP [Source:HGNC Symbol;Acc:HGNC:7678]	1.78382	-0.325591	0.00537522	0.0157848	Up-regulated
ENSG00000251297	TUBB7P	tubulin beta 7 pseudogene [Source:HGNC Symbol;Acc:HGNC:12413]	1.01514	0.166872	0.00537865	0.0157897	Up-regulated
ENSG00000225125	RANP4	RAN pseudogene 4 [Source:HGNC Symbol;Acc:HGNC:39859]	-1.05418	-0.950173	0.00540447	0.0158578	Down-regulated
ENSG00000267213	DPY19L3-DT	DPY19L3 divergent transcript [Source:HGNC Symbol;Acc:HGNC:55307]	-1.01546	-0.693738	0.00549843	0.0160864	Down-regulated
ENSG00000270117	0	novel transcript	-1.17318	-1.54704	0.00551023	0.0161157	Down-regulated
ENSG00000132535	DLG4	discs large MAGUK scaffold protein 4 [Source:HGNC Symbol;Acc:HGNC:2903]	-1.11879	0.190496	0.00556173	0.016248	Down-regulated
ENSG00000272656	0	novel transcript, antisense to MRPS22	-1.25062	-1.18319	0.00560999	0.0163656	Down-regulated
ENSG00000276651	0	novel transcript	-1.59808	-1.46073	0.00561015	0.0163656	Down-regulated
ENSG00000091106	NLRC4	NLR family CARD domain containing 4 [Source:HGNC Symbol;Acc:HGNC:16412]	-2.22856	-1.52064	0.00564503	0.016454	Down-regulated
ENSG00000260919	0	novel transcript, antisense to CLK3	-2.33918	-2.27258	0.00565335	0.016473	Down-regulated
ENSG00000171045	TSNARE1	t-SNARE domain containing 1 [Source:HGNC Symbol;Acc:HGNC:26437]	1.29308	1.74375	0.00566519	0.0164995	Up-regulated
ENSG00000148357	HMCN2	hemicentin 2 [Source:HGNC Symbol;Acc:HGNC:21293]	1.03737	0.850177	0.00569226	0.0165623	Up-regulated
ENSG00000255571	MIR9-3HG	MIR9-3 host gene [Source:HGNC Symbol;Acc:HGNC:27388]	-1.03861	1.11975	0.00572755	0.0166516	Down-regulated
ENSG00000157856	DRC1	dynein regulatory complex subunit 1 [Source:HGNC Symbol;Acc:HGNC:24245]	-1.11785	-0.69803	0.00575439	0.0167135	Down-regulated
ENSG00000089116	LHX5	LIM homeobox 5 [Source:HGNC Symbol;Acc:HGNC:14216]	-1.32061	-1.4011	0.00577461	0.0167668	Down-regulated
ENSG00000170290	SLN	sarcolipin [Source:HGNC Symbol;Acc:HGNC:11089]	-1.32954	-0.747046	0.00580576	0.0168437	Down-regulated
ENSG00000206417	H1-10-AS1	H1-10 antisense RNA 1 [Source:HGNC Symbol;Acc:HGNC:27953]	-1.12166	-0.430476	0.00588454	0.0170285	Down-regulated
ENSG00000130600	H19	H19 imprinted maternally expressed transcript [Source:HGNC Symbol;Acc:HGNC:4713]	-2.15611	-1.57318	0.00589129	0.0170453	Down-regulated
ENSG00000238141	BRWD1-AS1	BRWD1 antisense RNA 1 [Source:HGNC Symbol;Acc:HGNC:40614]	-1.62471	-1.37121	0.00589223	0.0170453	Down-regulated
ENSG00000235595	GAPDHP23	glyceraldehyde 3 phosphate dehydrogenase pseudogene 23 [Source:HGNC Symbol;Acc:HGNC:37775]	2.47647	-1.71396	0.00590731	0.0170765	Up-regulated
ENSG00000287697	0	novel transcript, antisense to CACYBP	-1.20988	-0.472127	0.00590775	0.0170765	Down-regulated
ENSG00000225891	DHDDS-AS1	DHDDS antisense RNA 1 [Source:HGNC Symbol;Acc:HGNC:40925]	-1.37529	-1.19497	0.0059148	0.0170914	Down-regulated
ENSG00000273319	0	novel transcript	-1.79107	-1.61503	0.00592671	0.0171231	Down-regulated
ENSG00000163263	C1orf189	chromosome 1 open reading frame 189 [Source:HGNC Symbol;Acc:HGNC:32305]	-1.68916	-1.78769	0.00593529	0.0171424	Down-regulated
ENSG00000258405	ZNF578	zinc finger protein 578 [Source:HGNC Symbol;Acc:HGNC:26449]	-1.42869	-0.702288	0.00594462	0.0171611	Down-regulated
ENSG00000261324	0	novel transcript, overlapping HIST4H4	-1.03409	4.12781	0.00595263	0.0171815	Down-regulated
ENSG00000269959	SPACA6P-AS	SPACA6P antisense RNA [Source:HGNC Symbol;Acc:HGNC:49383]	-1.62179	-1.32266	0.0060168	0.0173362	Down-regulated
ENSG00000249859	PVT1	Pvt1 oncogene [Source:HGNC Symbol;Acc:HGNC:9709]	-1.06048	-0.520242	0.00606254	0.0174526	Down-regulated
ENSG00000223486	0	novel transcript	-1.79776	-1.23886	0.00608055	0.0174948	Down-regulated
ENSG00000168140	VASN	vasorin [Source:HGNC Symbol;Acc:HGNC:18517]	-1.02162	-0.834772	0.00609583	0.0175304	Down-regulated
ENSG00000286000	0	novel transcript	-1.4734	-1.49679	0.00611583	0.0175767	Down-regulated
ENSG00000138271	GPR87	G protein-coupled receptor 87 [Source:HGNC Symbol;Acc:HGNC:4538]	-1.37268	-0.276684	0.00612873	0.0176109	Down-regulated
ENSG00000163083	INHBB	inhibin subunit beta B [Source:HGNC Symbol;Acc:HGNC:6067]	-1.01098	0.204939	0.00614433	0.0176474	Down-regulated
ENSG00000232788	ITGA6-AS1	ITGA6 antisense RNA 1 [Source:HGNC Symbol;Acc:HGNC:40308]	1.75784	-1.47877	0.00618535	0.0177524	Up-regulated
ENSG00000234377	OBI1-AS1	OBI1 antisense RNA 1 [Source:HGNC Symbol;Acc:HGNC:42700]	1.22989	0.229184	0.00627422	0.0179661	Up-regulated
ENSG00000102313	ITIH6	inter-alpha-trypsin inhibitor heavy chain family member 6 [Source:HGNC Symbol;Acc:HGNC:28907]	1.20162	-0.887689	0.0063109	0.0180511	Up-regulated
ENSG00000254732	0	novel protein, C11orf31-CTNND1 readthrough	-1.70218	-1.76176	0.00633099	0.0181	Down-regulated
ENSG00000172771	EFCAB12	EF-hand calcium binding domain 12 [Source:HGNC Symbol;Acc:HGNC:28061]	-1.36836	-0.709855	0.00633617	0.0181119	Down-regulated
ENSG00000235865	GSN-AS1	GSN antisense RNA 1 [Source:HGNC Symbol;Acc:HGNC:23372]	-1.98186	-1.54954	0.00645951	0.0184179	Down-regulated
ENSG00000258884	LINC02321	long intergenic non-protein coding RNA 2321 [Source:HGNC Symbol;Acc:HGNC:53240]	-1.35924	-1.35011	0.0064649	0.0184303	Down-regulated
ENSG00000089847	ANKRD24	ankyrin repeat domain 24 [Source:HGNC Symbol;Acc:HGNC:29424]	-1.17319	0.809156	0.00649057	0.0184918	Down-regulated
ENSG00000183092	BEGAIN	brain enriched guanylate kinase associated [Source:HGNC Symbol;Acc:HGNC:24163]	2.52491	-1.33531	0.00650836	0.0185315	Up-regulated
ENSG00000287584	0	novel transcript	-1.36189	-0.463275	0.00653371	0.0185873	Down-regulated
ENSG00000287778	0	novel transcript, antisense to HS3ST1	-1.02789	0.397131	0.00661049	0.0187713	Down-regulated
ENSG00000149609	C20orf144	chromosome 20 open reading frame 144 [Source:HGNC Symbol;Acc:HGNC:16137]	-1.08916	-0.615669	0.00662527	0.0188074	Down-regulated
ENSG00000273001	PFKP-DT	PFKP divergent transcript [Source:HGNC Symbol;Acc:HGNC:55177]	-1.08416	0.423347	0.00665608	0.0188711	Down-regulated
ENSG00000240211	PPP1R35-AS1	PPP1R35 antisense RNA 1 [Source:HGNC Symbol;Acc:HGNC:41194]	-1.51463	-1.30493	0.00679934	0.0192019	Down-regulated
ENSG00000256361	0	glycine cleavage system protein H (aminomethyl carrier) (GCSH)	-2.18716	-2.09422	0.00684168	0.0192883	Down-regulated
ENSG00000279196	0	novel transcript	-1.49183	-0.90474	0.00684424	0.0192925	Down-regulated
ENSG00000174145	NWD2	NACHT and WD repeat domain containing 2 [Source:HGNC Symbol;Acc:HGNC:29229]	-1.09179	-0.437041	0.00686003	0.0193249	Down-regulated
ENSG00000272989	LINC02012	long intergenic non-protein coding RNA 2012 [Source:HGNC Symbol;Acc:HGNC:52847]	-1.48541	-0.987069	0.00686702	0.0193386	Down-regulated
ENSG00000198406	BZW1P2	basic leucine zipper and W2 domains 1 pseudogene 2 [Source:HGNC Symbol;Acc:HGNC:33954]	-1.09404	-0.737319	0.00687082	0.0193463	Down-regulated
ENSG00000213199	ASIC3	acid sensing ion channel subunit 3 [Source:HGNC Symbol;Acc:HGNC:101]	-1.21792	-0.767571	0.00691242	0.0194279	Down-regulated
ENSG00000250072	SH3TC2-DT	SH3TC2 divergent transcript [Source:HGNC Symbol;Acc:HGNC:52905]	-1.40167	-1.35931	0.00695048	0.0195158	Down-regulated
ENSG00000287219	0	novel transcript	-1.37995	-1.22615	0.00701317	0.0196521	Down-regulated
ENSG00000137463	MGARP	mitochondria localized glutamic acid rich protein [Source:HGNC Symbol;Acc:HGNC:29969]	-1.51841	-1.55049	0.00702961	0.019689	Down-regulated
ENSG00000277287	0	novel transcript	1.28662	-1.13373	0.00709769	0.0198612	Up-regulated
ENSG00000289532	0	novel transcript	-1.05528	-0.828505	0.00711844	0.0199131	Down-regulated
ENSG00000236862	RPS20P24	ribosomal protein S20 pseudogene 24 [Source:HGNC Symbol;Acc:HGNC:36283]	-1.01974	-0.537094	0.00713078	0.0199353	Down-regulated
ENSG00000111432	FZD10	frizzled class receptor 10 [Source:HGNC Symbol;Acc:HGNC:4039]	-1.59008	-1.42759	0.00725922	0.0202483	Down-regulated
ENSG00000223711	0	novel transcript	-1.21897	-0.968864	0.00732936	0.0204114	Down-regulated
ENSG00000125864	BFSP1	beaded filament structural protein 1 [Source:HGNC Symbol;Acc:HGNC:1040]	-1.6651	-1.20039	0.00733991	0.0204345	Down-regulated
ENSG00000289041	0	novel transcript	-1.71164	-1.47006	0.0074065	0.0205914	Down-regulated
ENSG00000289365	0	novel transcript	-2.06375	-2.1769	0.00743287	0.0206551	Down-regulated
ENSG00000246526	LINC02481	long intergenic non-protein coding RNA 2481 [Source:HGNC Symbol;Acc:HGNC:27958]	-1.12739	-0.752038	0.00746166	0.0207192	Down-regulated
ENSG00000216560	LINC00955	long intergenic non-protein coding RNA 955 [Source:HGNC Symbol;Acc:HGNC:26644]	1.60948	-0.756887	0.00753079	0.0208854	Up-regulated
ENSG00000242479	0	eukaryotic translation initiation factor 2-alpha kinase 1 (EIF2AK1) pseudogene	-1.21536	-1.47152	0.00753319	0.0208857	Down-regulated
ENSG00000242193	CRYZL2P	crystallin zeta like 2, pseudogene [Source:HGNC Symbol;Acc:HGNC:52164]	1.75303	-1.40289	0.00754238	0.0209048	Up-regulated
ENSG00000276957	0	novel transcript	-1.38392	-1.26941	0.00766419	0.0212001	Down-regulated
ENSG00000258377	0	novel transcript	-1.12642	-1.58056	0.00766997	0.0212128	Down-regulated
ENSG00000251191	LINC00589	long intergenic non-protein coding RNA 589 [Source:HGNC Symbol;Acc:HGNC:32299]	-1.20671	-0.490359	0.00769076	0.021267	Down-regulated
ENSG00000242114	MTFP1	mitochondrial fission process 1 [Source:HGNC Symbol;Acc:HGNC:26945]	-1.29912	-1.74295	0.00770138	0.0212833	Down-regulated
ENSG00000288989	0	novel transcript	-1.2771	-0.120952	0.00770251	0.0212833	Down-regulated
ENSG00000003137	CYP26B1	cytochrome P450 family 26 subfamily B member 1 [Source:HGNC Symbol;Acc:HGNC:20581]	-1.43654	-1.22168	0.00776627	0.021424	Down-regulated
[truncated: 199 more rows]

## Sheet: AFB1 vs IND
GENE ID	GENE SYMBOL	GENE DESCRIPTION	logFC	logCPM	PValue	FDR	Up/Down-regulated
ENSG00000023171	GRAMD1B	GRAM domain containing 1B [Source:HGNC Symbol;Acc:HGNC:29214]	-5.24402	7.35633	3.28583e-23	3.36244e-19	Down-regulated
ENSG00000175600	SUGCT	succinyl-CoA:glutarate-CoA transferase [Source:HGNC Symbol;Acc:HGNC:16001]	-8.01437	4.67548	3.72364e-23	3.36244e-19	Down-regulated
ENSG00000136828	RALGPS1	Ral GEF with PH domain and SH3 binding motif 1 [Source:HGNC Symbol;Acc:HGNC:16851]	-4.13355	6.4675	2.77949e-22	1.67325e-18	Down-regulated
ENSG00000083123	BCKDHB	branched chain keto acid dehydrogenase E1 subunit beta [Source:HGNC Symbol;Acc:HGNC:987]	-4.0694	5.60129	3.81035e-22	1.72038e-18	Down-regulated
ENSG00000146416	AIG1	androgen induced 1 [Source:HGNC Symbol;Acc:HGNC:21607]	-3.18912	7.13146	1.46251e-21	4.14293e-18	Down-regulated
ENSG00000143641	GALNT2	polypeptide N-acetylgalactosaminyltransferase 2 [Source:HGNC Symbol;Acc:HGNC:4124]	-3.00101	6.92779	1.48657e-21	4.14293e-18	Down-regulated
ENSG00000184005	ST6GALNAC3	ST6 N-acetylgalactosaminide alpha-2,6-sialyltransferase 3 [Source:HGNC Symbol;Acc:HGNC:19343]	-7.10226	4.4171	1.60579e-21	4.14293e-18	Down-regulated
ENSG00000112699	GMDS	GDP-mannose 4,6-dehydratase [Source:HGNC Symbol;Acc:HGNC:4369]	-4.62555	4.28738	2.37136e-21	5.16329e-18	Down-regulated
ENSG00000168243	GNG4	G protein subunit gamma 4 [Source:HGNC Symbol;Acc:HGNC:4407]	-3.79272	5.52943	2.57307e-21	5.16329e-18	Down-regulated
ENSG00000133424	LARGE1	LARGE xylosyl- and glucuronyltransferase 1 [Source:HGNC Symbol;Acc:HGNC:6511]	-6.36711	4.79646	3.36108e-21	5.36609e-18	Down-regulated
ENSG00000157570	TSPAN18	tetraspanin 18 [Source:HGNC Symbol;Acc:HGNC:20660]	-6.1951	4.85484	3.71466e-21	5.36609e-18	Down-regulated
ENSG00000119711	ALDH6A1	aldehyde dehydrogenase 6 family member A1 [Source:HGNC Symbol;Acc:HGNC:7179]	-3.65239	6.77994	3.80424e-21	5.36609e-18	Down-regulated
ENSG00000169084	DHRSX	dehydrogenase/reductase X-linked [Source:HGNC Symbol;Acc:HGNC:18399]	-5.24201	4.6174	4.13585e-21	5.36609e-18	Down-regulated
ENSG00000054793	ATP9A	ATPase phospholipid transporting 9A (putative) [Source:HGNC Symbol;Acc:HGNC:13540]	-3.45429	7.12692	4.57816e-21	5.36609e-18	Down-regulated
ENSG00000137266	SLC22A23	solute carrier family 22 member 23 [Source:HGNC Symbol;Acc:HGNC:21106]	-3.47091	5.71872	4.85693e-21	5.36609e-18	Down-regulated
ENSG00000157388	CACNA1D	calcium voltage-gated channel subunit alpha1 D [Source:HGNC Symbol;Acc:HGNC:1391]	-5.41437	5.62703	5.09191e-21	5.36609e-18	Down-regulated
ENSG00000174992	ZG16	zymogen granule protein 16 [Source:HGNC Symbol;Acc:HGNC:30961]	-3.74179	7.13214	5.23897e-21	5.36609e-18	Down-regulated
ENSG00000147202	DIAPH2	diaphanous related formin 2 [Source:HGNC Symbol;Acc:HGNC:2877]	-5.31471	4.74903	5.6317e-21	5.36609e-18	Down-regulated
ENSG00000176658	MYO1D	myosin ID [Source:HGNC Symbol;Acc:HGNC:7598]	-3.03636	8.1015	5.64538e-21	5.36609e-18	Down-regulated
ENSG00000107745	MICU1	mitochondrial calcium uptake 1 [Source:HGNC Symbol;Acc:HGNC:1530]	-3.20353	6.59114	6.5443e-21	5.83219e-18	Down-regulated
ENSG00000119522	DENND1A	DENN domain containing 1A [Source:HGNC Symbol;Acc:HGNC:29324]	-4.67981	5.37145	6.78162e-21	5.83219e-18	Down-regulated
ENSG00000140479	PCSK6	proprotein convertase subtilisin/kexin type 6 [Source:HGNC Symbol;Acc:HGNC:8569]	-3.81336	5.3709	7.45684e-21	6.12139e-18	Down-regulated
ENSG00000054611	TBC1D22A	TBC1 domain family member 22A [Source:HGNC Symbol;Acc:HGNC:1309]	-4.27813	4.50562	1.22153e-20	9.59163e-18	Down-regulated
ENSG00000172164	SNTB1	syntrophin beta 1 [Source:HGNC Symbol;Acc:HGNC:11168]	-4.03885	6.2799	1.41059e-20	1.03686e-17	Down-regulated
ENSG00000145743	FBXL17	F-box and leucine rich repeat protein 17 [Source:HGNC Symbol;Acc:HGNC:13615]	-5.48072	4.54399	1.43531e-20	1.03686e-17	Down-regulated
ENSG00000049618	ARID1B	AT-rich interaction domain 1B [Source:HGNC Symbol;Acc:HGNC:18040]	-3.51576	4.80355	1.60446e-20	1.04924e-17	Down-regulated
ENSG00000160293	VAV2	vav guanine nucleotide exchange factor 2 [Source:HGNC Symbol;Acc:HGNC:12658]	-3.04894	6.26317	1.60484e-20	1.04924e-17	Down-regulated
ENSG00000153815	CMIP	c-Maf inducing protein [Source:HGNC Symbol;Acc:HGNC:24319]	-3.38946	6.77319	1.62673e-20	1.04924e-17	Down-regulated
ENSG00000257923	CUX1	cut like homeobox 1 [Source:HGNC Symbol;Acc:HGNC:2557]	-2.70532	6.0815	1.74694e-20	1.08792e-17	Down-regulated
ENSG00000173406	DAB1	DAB adaptor protein 1 [Source:HGNC Symbol;Acc:HGNC:2661]	-5.87398	4.6201	2.4507e-20	1.47532e-17	Down-regulated
ENSG00000104419	NDRG1	N-myc downstream regulated 1 [Source:HGNC Symbol;Acc:HGNC:7679]	-3.11105	10.4327	2.62133e-20	1.51543e-17	Down-regulated
ENSG00000145012	LPP	LIM domain containing preferred translocation partner in lipoma [Source:HGNC Symbol;Acc:HGNC:6679]	-4.51731	6.11925	2.68514e-20	1.51543e-17	Down-regulated
ENSG00000068383	INPP5A	inositol polyphosphate-5-phosphatase A [Source:HGNC Symbol;Acc:HGNC:6076]	-4.28511	4.89273	2.87549e-20	1.57368e-17	Down-regulated
ENSG00000106078	COBL	cordon-bleu WH2 repeat protein [Source:HGNC Symbol;Acc:HGNC:22199]	-3.11251	6.38705	3.27966e-20	1.73102e-17	Down-regulated
ENSG00000132688	NES	nestin [Source:HGNC Symbol;Acc:HGNC:7756]	3.96685	6.90983	3.3547e-20	1.73102e-17	Up-regulated
ENSG00000197555	SIPA1L1	signal induced proliferation associated 1 like 1 [Source:HGNC Symbol;Acc:HGNC:20284]	-3.12062	6.23566	3.70936e-20	1.83445e-17	Down-regulated
ENSG00000162105	SHANK2	SH3 and multiple ankyrin repeat domains 2 [Source:HGNC Symbol;Acc:HGNC:14295]	-4.74249	5.01043	3.7583e-20	1.83445e-17	Down-regulated
ENSG00000167632	TRAPPC9	trafficking protein particle complex subunit 9 [Source:HGNC Symbol;Acc:HGNC:30832]	-4.44903	3.7588	4.14865e-20	1.9717e-17	Down-regulated
ENSG00000010803	SCMH1	Scm polycomb group protein homolog 1 [Source:HGNC Symbol;Acc:HGNC:19003]	-3.58379	4.67032	6.0343e-20	2.79434e-17	Down-regulated
ENSG00000198873	GRK5	G protein-coupled receptor kinase 5 [Source:HGNC Symbol;Acc:HGNC:4544]	-3.47022	6.02793	6.99995e-20	3.16048e-17	Down-regulated
ENSG00000140718	FTO	FTO alpha-ketoglutarate dependent dioxygenase [Source:HGNC Symbol;Acc:HGNC:24678]	-4.26814	4.82903	8.97374e-20	3.87773e-17	Down-regulated
ENSG00000164418	GRIK2	glutamate ionotropic receptor kainate type subunit 2 [Source:HGNC Symbol;Acc:HGNC:4580]	-5.1055	4.82133	9.01799e-20	3.87773e-17	Down-regulated
ENSG00000148484	RSU1	Ras suppressor protein 1 [Source:HGNC Symbol;Acc:HGNC:10464]	-3.16222	4.94753	9.44392e-20	3.89099e-17	Down-regulated
ENSG00000100600	LGMN	legumain [Source:HGNC Symbol;Acc:HGNC:9472]	2.56315	6.88372	9.79632e-20	3.89099e-17	Up-regulated
ENSG00000138193	PLCE1	phospholipase C epsilon 1 [Source:HGNC Symbol;Acc:HGNC:17175]	-4.25625	6.22078	9.80727e-20	3.89099e-17	Down-regulated
ENSG00000167323	STIM1	stromal interaction molecule 1 [Source:HGNC Symbol;Acc:HGNC:11386]	-2.92109	6.6048	1.00898e-19	3.89099e-17	Down-regulated
ENSG00000262655	SPON1	spondin 1 [Source:HGNC Symbol;Acc:HGNC:11252]	-4.44386	6.22771	1.01261e-19	3.89099e-17	Down-regulated
ENSG00000148842	CNNM2	cyclin and CBS domain divalent metal cation transport mediator 2 [Source:HGNC Symbol;Acc:HGNC:103]	-3.3108	4.7496	1.19864e-19	4.50989e-17	Down-regulated
ENSG00000105738	SIPA1L3	signal induced proliferation associated 1 like 3 [Source:HGNC Symbol;Acc:HGNC:23801]	-3.71113	5.64632	1.31379e-19	4.84226e-17	Down-regulated
ENSG00000101096	NFATC2	nuclear factor of activated T cells 2 [Source:HGNC Symbol;Acc:HGNC:7776]	-3.39469	5.78093	1.35533e-19	4.89543e-17	Down-regulated
ENSG00000139173	TMEM117	transmembrane protein 117 [Source:HGNC Symbol;Acc:HGNC:25308]	-5.82719	4.88892	1.50886e-19	5.34315e-17	Down-regulated
ENSG00000114480	GBE1	1,4-alpha-glucan branching enzyme 1 [Source:HGNC Symbol;Acc:HGNC:4180]	-3.14633	4.96154	2.13067e-19	7.39997e-17	Down-regulated
ENSG00000138796	HADH	hydroxyacyl-CoA dehydrogenase [Source:HGNC Symbol;Acc:HGNC:4799]	-2.31702	6.82647	2.47559e-19	8.31145e-17	Down-regulated
ENSG00000160746	ANO10	anoctamin 10 [Source:HGNC Symbol;Acc:HGNC:25519]	-3.85082	4.14518	2.48515e-19	8.31145e-17	Down-regulated
ENSG00000183044	ABAT	4-aminobutyrate aminotransferase [Source:HGNC Symbol;Acc:HGNC:23]	-4.01315	5.36737	2.59633e-19	8.52541e-17	Down-regulated
ENSG00000099256	PRTFDC1	phosphoribosyl transferase domain containing 1 [Source:HGNC Symbol;Acc:HGNC:23333]	-3.13334	4.9431	2.81674e-19	9.08397e-17	Down-regulated
ENSG00000101079	NDRG3	NDRG family member 3 [Source:HGNC Symbol;Acc:HGNC:14462]	-2.96572	6.35048	2.95905e-19	9.22431e-17	Down-regulated
ENSG00000138162	TACC2	transforming acidic coiled-coil containing protein 2 [Source:HGNC Symbol;Acc:HGNC:11523]	-2.59145	7.18081	2.9624e-19	9.22431e-17	Down-regulated
ENSG00000156110	ADK	adenosine kinase [Source:HGNC Symbol;Acc:HGNC:257]	-4.32931	5.00203	3.40043e-19	1.04088e-16	Down-regulated
ENSG00000070366	SMG6	SMG6 nonsense mediated mRNA decay factor [Source:HGNC Symbol;Acc:HGNC:17809]	-2.7129	5.0488	3.91922e-19	1.16004e-16	Down-regulated
ENSG00000111452	ADGRD1	adhesion G protein-coupled receptor D1 [Source:HGNC Symbol;Acc:HGNC:19893]	-5.59839	4.95695	3.95268e-19	1.16004e-16	Down-regulated
ENSG00000110911	SLC11A2	solute carrier family 11 member 2 [Source:HGNC Symbol;Acc:HGNC:10908]	-3.16992	12.0368	3.98243e-19	1.16004e-16	Down-regulated
ENSG00000171105	INSR	insulin receptor [Source:HGNC Symbol;Acc:HGNC:6091]	-2.49751	6.72815	4.21398e-19	1.20801e-16	Down-regulated
ENSG00000162734	PEA15	proliferation and apoptosis adaptor protein 15 [Source:HGNC Symbol;Acc:HGNC:8822]	2.66034	6.84871	4.73603e-19	1.33645e-16	Up-regulated
ENSG00000067141	NEO1	neogenin 1 [Source:HGNC Symbol;Acc:HGNC:7754]	-3.66991	5.45547	4.83621e-19	1.3396e-16	Down-regulated
ENSG00000088367	EPB41L1	erythrocyte membrane protein band 4.1 like 1 [Source:HGNC Symbol;Acc:HGNC:3378]	-2.09965	7.30035	4.89555e-19	1.3396e-16	Down-regulated
ENSG00000006659	LGALS14	galectin 14 [Source:HGNC Symbol;Acc:HGNC:30054]	-2.97083	9.16218	5.19239e-19	1.39962e-16	Down-regulated
ENSG00000154229	PRKCA	protein kinase C alpha [Source:HGNC Symbol;Acc:HGNC:9393]	-4.98848	4.13115	5.46129e-19	1.45045e-16	Down-regulated
ENSG00000159023	EPB41	erythrocyte membrane protein band 4.1 [Source:HGNC Symbol;Acc:HGNC:3377]	-3.6218	5.00729	5.58054e-19	1.46065e-16	Down-regulated
ENSG00000131374	TBC1D5	TBC1 domain family member 5 [Source:HGNC Symbol;Acc:HGNC:19166]	-4.12653	4.99751	5.9445e-19	1.53154e-16	Down-regulated
ENSG00000149600	COMMD7	COMM domain containing 7 [Source:HGNC Symbol;Acc:HGNC:16223]	-3.2515	5.93207	6.02101e-19	1.53154e-16	Down-regulated
ENSG00000140563	MCTP2	multiple C2 and transmembrane domain containing 2 [Source:HGNC Symbol;Acc:HGNC:25636]	-3.18267	4.89687	6.46804e-19	1.58205e-16	Down-regulated
ENSG00000065882	TBC1D1	TBC1 domain family member 1 [Source:HGNC Symbol;Acc:HGNC:11578]	-3.33683	5.06408	6.54298e-19	1.58205e-16	Down-regulated
ENSG00000175130	MARCKSL1	MARCKS like 1 [Source:HGNC Symbol;Acc:HGNC:7142]	2.4052	7.22833	6.60872e-19	1.58205e-16	Up-regulated
ENSG00000116117	PARD3B	par-3 family cell polarity regulator beta [Source:HGNC Symbol;Acc:HGNC:14446]	-5.14713	4.57971	6.65244e-19	1.58205e-16	Down-regulated
ENSG00000151276	MAGI1	membrane associated guanylate kinase, WW and PDZ domain containing 1 [Source:HGNC Symbol;Acc:HGNC:946]	-5.10506	5.67658	6.65756e-19	1.58205e-16	Down-regulated
ENSG00000038532	CLEC16A	C-type lectin domain containing 16A [Source:HGNC Symbol;Acc:HGNC:29013]	-3.47288	4.05387	7.06171e-19	1.63603e-16	Down-regulated
ENSG00000182197	EXT1	exostosin glycosyltransferase 1 [Source:HGNC Symbol;Acc:HGNC:3512]	-3.3775	4.91342	7.06593e-19	1.63603e-16	Down-regulated
ENSG00000175198	PCCA	propionyl-CoA carboxylase subunit alpha [Source:HGNC Symbol;Acc:HGNC:8653]	-3.91093	4.56493	7.23424e-19	1.6538e-16	Down-regulated
ENSG00000149179	C11orf49	chromosome 11 open reading frame 49 [Source:HGNC Symbol;Acc:HGNC:28720]	-3.79345	4.82525	7.61321e-19	1.71868e-16	Down-regulated
ENSG00000164494	PDSS2	decaprenyl diphosphate synthase subunit 2 [Source:HGNC Symbol;Acc:HGNC:23041]	-3.37779	4.00403	8.19472e-19	1.82712e-16	Down-regulated
ENSG00000151413	NUBPL	nucleotide binding protein like [Source:HGNC Symbol;Acc:HGNC:20278]	-3.5385	3.50758	8.52937e-19	1.87854e-16	Down-regulated
ENSG00000165406	MARCHF8	membrane associated ring-CH-type finger 8 [Source:HGNC Symbol;Acc:HGNC:23356]	-3.48771	5.95364	8.72469e-19	1.89841e-16	Down-regulated
ENSG00000101098	RIMS4	regulating synaptic membrane exocytosis 4 [Source:HGNC Symbol;Acc:HGNC:16183]	-3.2623	4.42909	9.13554e-19	1.96414e-16	Down-regulated
ENSG00000107077	KDM4C	lysine demethylase 4C [Source:HGNC Symbol;Acc:HGNC:17071]	-3.21166	5.65295	9.2541e-19	1.96622e-16	Down-regulated
ENSG00000181222	POLR2A	RNA polymerase II subunit A [Source:HGNC Symbol;Acc:HGNC:9187]	2.04894	8.68463	9.52159e-19	1.99953e-16	Up-regulated
ENSG00000157985	AGAP1	ArfGAP with GTPase domain, ankyrin repeat and PH domain 1 [Source:HGNC Symbol;Acc:HGNC:16922]	-4.0902	5.49575	1.02087e-18	2.11779e-16	Down-regulated
ENSG00000136770	DNAJC1	DnaJ heat shock protein family (Hsp40) member C1 [Source:HGNC Symbol;Acc:HGNC:20090]	-2.82301	4.50124	1.03192e-18	2.11779e-16	Down-regulated
ENSG00000133812	SBF2	SET binding factor 2 [Source:HGNC Symbol;Acc:HGNC:2135]	-4.33345	5.30588	1.05317e-18	2.13711e-16	Down-regulated
ENSG00000167306	MYO5B	myosin VB [Source:HGNC Symbol;Acc:HGNC:7603]	-3.1156	6.13904	1.14714e-18	2.29425e-16	Down-regulated
ENSG00000162104	ADCY9	adenylate cyclase 9 [Source:HGNC Symbol;Acc:HGNC:240]	-4.00866	4.53701	1.15602e-18	2.29425e-16	Down-regulated
ENSG00000090975	PITPNM2	phosphatidylinositol transfer protein membrane associated 2 [Source:HGNC Symbol;Acc:HGNC:21044]	-3.39137	4.05785	1.21365e-18	2.38246e-16	Down-regulated
ENSG00000124788	ATXN1	ataxin 1 [Source:HGNC Symbol;Acc:HGNC:10548]	-3.00676	5.32672	1.25861e-18	2.44414e-16	Down-regulated
ENSG00000158019	BABAM2	BRISC and BRCA1 A complex member 2 [Source:HGNC Symbol;Acc:HGNC:1106]	-4.03873	4.66934	1.33465e-18	2.56423e-16	Down-regulated
ENSG00000145362	ANK2	ankyrin 2 [Source:HGNC Symbol;Acc:HGNC:493]	-4.56012	4.58373	1.48727e-18	2.82738e-16	Down-regulated
ENSG00000144283	PKP4	plakophilin 4 [Source:HGNC Symbol;Acc:HGNC:9026]	-2.87413	6.31138	1.52755e-18	2.83994e-16	Down-regulated
ENSG00000064763	FAR2	fatty acyl-CoA reductase 2 [Source:HGNC Symbol;Acc:HGNC:25531]	-3.05546	5.39901	1.53356e-18	2.83994e-16	Down-regulated
ENSG00000134001	EIF2S1	eukaryotic translation initiation factor 2 subunit alpha [Source:HGNC Symbol;Acc:HGNC:3265]	2.15055	7.07725	1.54105e-18	2.83994e-16	Up-regulated
ENSG00000041802	LSG1	large 60S subunit nuclear export GTPase 1 [Source:HGNC Symbol;Acc:HGNC:25652]	2.0315	7.07468	1.62353e-18	2.96171e-16	Up-regulated
ENSG00000150054	MPP7	membrane palmitoylated protein 7 [Source:HGNC Symbol;Acc:HGNC:26542]	-3.35396	5.79611	1.72629e-18	3.11767e-16	Down-regulated
ENSG00000004866	ST7	suppression of tumorigenicity 7 [Source:HGNC Symbol;Acc:HGNC:11351]	-3.16295	4.99288	1.78119e-18	3.18498e-16	Down-regulated
ENSG00000174306	ZHX3	zinc fingers and homeoboxes 3 [Source:HGNC Symbol;Acc:HGNC:15935]	-3.96185	6.03219	1.82603e-18	3.23315e-16	Down-regulated
ENSG00000185305	ARL15	ADP ribosylation factor like GTPase 15 [Source:HGNC Symbol;Acc:HGNC:25945]	-3.92687	5.4654	1.86391e-18	3.26817e-16	Down-regulated
ENSG00000131171	SH3BGRL	SH3 domain binding glutamate rich protein like [Source:HGNC Symbol;Acc:HGNC:10823]	-2.61357	5.78839	2.1067e-18	3.65837e-16	Down-regulated
ENSG00000198382	UVRAG	UV radiation resistance associated [Source:HGNC Symbol;Acc:HGNC:12640]	-3.25348	5.0566	2.16775e-18	3.72853e-16	Down-regulated
ENSG00000106554	CHCHD3	coiled-coil-helix-coiled-coil-helix domain containing 3 [Source:HGNC Symbol;Acc:HGNC:21906]	-2.46572	5.8037	2.22135e-18	3.78467e-16	Down-regulated
ENSG00000107611	CUBN	cubilin [Source:HGNC Symbol;Acc:HGNC:2548]	-3.30473	8.86077	2.29329e-18	3.87072e-16	Down-regulated
ENSG00000145819	ARHGAP26	Rho GTPase activating protein 26 [Source:HGNC Symbol;Acc:HGNC:17073]	-3.53507	5.40637	2.33082e-18	3.89765e-16	Down-regulated
ENSG00000229005	HNF4A-AS1	HNF4A antisense RNA 1 [Source:HGNC Symbol;Acc:HGNC:49505]	-6.06828	4.08982	2.52942e-18	4.15077e-16	Down-regulated
ENSG00000172292	CERS6	ceramide synthase 6 [Source:HGNC Symbol;Acc:HGNC:23826]	-3.53332	6.58926	2.53411e-18	4.15077e-16	Down-regulated
ENSG00000169439	SDC2	syndecan 2 [Source:HGNC Symbol;Acc:HGNC:10659]	-3.23412	4.97661	2.55114e-18	4.15077e-16	Down-regulated
ENSG00000138759	FRAS1	Fraser extracellular matrix complex subunit 1 [Source:HGNC Symbol;Acc:HGNC:19185]	-4.08613	5.19927	2.85224e-18	4.59924e-16	Down-regulated
ENSG00000198786	MT-ND5	mitochondrially encoded NADH:ubiquinone oxidoreductase core subunit 5 [Source:HGNC Symbol;Acc:HGNC:7461]	-3.49072	12.938	3.08104e-18	4.92422e-16	Down-regulated
ENSG00000149596	JPH2	junctophilin 2 [Source:HGNC Symbol;Acc:HGNC:14202]	-3.18692	5.32368	3.23875e-18	5.13086e-16	Down-regulated
ENSG00000151779	NBAS	NBAS subunit of NRZ tethering complex [Source:HGNC Symbol;Acc:HGNC:15625]	-4.12616	5.29436	3.68906e-18	5.79343e-16	Down-regulated
ENSG00000152767	FARP1	FERM, ARH/RhoGEF and pleckstrin domain protein 1 [Source:HGNC Symbol;Acc:HGNC:3591]	-3.10634	5.58766	3.73908e-18	5.82137e-16	Down-regulated
ENSG00000141376	BCAS3	BCAS3 microtubule associated cell migration factor [Source:HGNC Symbol;Acc:HGNC:14347]	-4.2407	4.09995	3.84222e-18	5.93081e-16	Down-regulated
ENSG00000073331	ALPK1	alpha kinase 1 [Source:HGNC Symbol;Acc:HGNC:20917]	-2.79742	4.24121	3.88282e-18	5.94268e-16	Down-regulated
ENSG00000103489	XYLT1	xylosyltransferase 1 [Source:HGNC Symbol;Acc:HGNC:15516]	-4.17166	3.54211	3.93235e-18	5.96792e-16	Down-regulated
ENSG00000055163	CYFIP2	cytoplasmic FMR1 interacting protein 2 [Source:HGNC Symbol;Acc:HGNC:13760]	-3.87258	4.59768	4.04694e-18	6.09064e-16	Down-regulated
ENSG00000189221	MAOA	monoamine oxidase A [Source:HGNC Symbol;Acc:HGNC:6833]	-4.57156	4.19093	4.20536e-18	6.21778e-16	Down-regulated
ENSG00000175166	PSMD2	proteasome 26S subunit ubiquitin receptor, non-ATPase 2 [Source:HGNC Symbol;Acc:HGNC:9559]	2.06683	8.10313	4.22997e-18	6.21778e-16	Up-regulated
ENSG00000174705	SH3PXD2B	SH3 and PX domains 2B [Source:HGNC Symbol;Acc:HGNC:29242]	-3.13266	3.50945	4.2347e-18	6.21778e-16	Down-regulated
ENSG00000188559	RALGAPA2	Ral GTPase activating protein catalytic subunit alpha 2 [Source:HGNC Symbol;Acc:HGNC:16207]	-3.38568	5.32922	4.35162e-18	6.29606e-16	Down-regulated
ENSG00000160818	GPATCH4	G-patch domain containing 4 [Source:HGNC Symbol;Acc:HGNC:25982]	2.27949	5.83642	4.35774e-18	6.29606e-16	Up-regulated
ENSG00000198589	LRBA	LPS responsive beige-like anchor protein [Source:HGNC Symbol;Acc:HGNC:1742]	-4.18963	5.67911	4.99978e-18	7.16635e-16	Down-regulated
ENSG00000156639	ZFAND3	zinc finger AN1-type containing 3 [Source:HGNC Symbol;Acc:HGNC:18019]	-2.65482	6.05295	5.1869e-18	7.37601e-16	Down-regulated
ENSG00000153944	MSI2	musashi RNA binding protein 2 [Source:HGNC Symbol;Acc:HGNC:18585]	-2.78042	5.93606	5.31059e-18	7.49291e-16	Down-regulated
ENSG00000183826	BTBD9	BTB domain containing 9 [Source:HGNC Symbol;Acc:HGNC:21228]	-4.81442	3.74269	5.41779e-18	7.5849e-16	Down-regulated
ENSG00000078070	MCCC1	methylcrotonyl-CoA carboxylase subunit 1 [Source:HGNC Symbol;Acc:HGNC:6936]	-2.56335	4.83793	5.83104e-18	8.10067e-16	Down-regulated
ENSG00000135537	AFG1L	AFG1 like ATPase [Source:HGNC Symbol;Acc:HGNC:16411]	-4.25454	3.68733	6.1559e-18	8.48668e-16	Down-regulated
ENSG00000189283	FHIT	fragile histidine triad diadenosine triphosphatase [Source:HGNC Symbol;Acc:HGNC:3701]	-4.75646	3.46142	6.49823e-18	8.89076e-16	Down-regulated
ENSG00000156011	PSD3	pleckstrin and Sec7 domain containing 3 [Source:HGNC Symbol;Acc:HGNC:19093]	-5.91445	4.11886	6.62825e-18	9.00047e-16	Down-regulated
ENSG00000119487	MAPKAP1	MAPK associated protein 1 [Source:HGNC Symbol;Acc:HGNC:18752]	-2.50382	5.84927	6.7442e-18	9.08957e-16	Down-regulated
ENSG00000110693	SOX6	SRY-box transcription factor 6 [Source:HGNC Symbol;Acc:HGNC:16421]	-4.37924	5.1078	7.03269e-18	9.40817e-16	Down-regulated
ENSG00000166197	NOLC1	nucleolar and coiled-body phosphoprotein 1 [Source:HGNC Symbol;Acc:HGNC:15608]	2.16063	7.73563	7.28824e-18	9.67836e-16	Up-regulated
ENSG00000121440	PDZRN3	PDZ domain containing ring finger 3 [Source:HGNC Symbol;Acc:HGNC:17704]	-4.41626	2.94255	7.71474e-18	1.01699e-15	Down-regulated
ENSG00000068615	REEP1	receptor accessory protein 1 [Source:HGNC Symbol;Acc:HGNC:25786]	-3.77071	4.21885	7.95617e-18	1.04122e-15	Down-regulated
ENSG00000054965	FAM168A	family with sequence similarity 168 member A [Source:HGNC Symbol;Acc:HGNC:28999]	-2.9277	6.62491	8.16788e-18	1.06124e-15	Down-regulated
ENSG00000197077	KIAA1671	KIAA1671 [Source:HGNC Symbol;Acc:HGNC:29345]	-3.09539	6.17944	8.88231e-18	1.14136e-15	Down-regulated
ENSG00000198722	UNC13B	unc-13 homolog B [Source:HGNC Symbol;Acc:HGNC:12566]	-2.90075	4.88386	8.91095e-18	1.14136e-15	Down-regulated
ENSG00000133943	DGLUCY	D-glutamate cyclase [Source:HGNC Symbol;Acc:HGNC:20498]	-2.35365	5.42746	9.37059e-18	1.19178e-15	Down-regulated
ENSG00000102763	VWA8	von Willebrand factor A domain containing 8 [Source:HGNC Symbol;Acc:HGNC:29071]	-3.30624	4.27833	9.64178e-18	1.2177e-15	Down-regulated
ENSG00000173950	XXYLT1	xyloside xylosyltransferase 1 [Source:HGNC Symbol;Acc:HGNC:26639]	-4.32222	3.02721	1.00011e-17	1.2543e-15	Down-regulated
ENSG00000064652	SNX24	sorting nexin 24 [Source:HGNC Symbol;Acc:HGNC:21533]	-3.03401	5.10397	1.0507e-17	1.30866e-15	Down-regulated
ENSG00000108100	CCNY	cyclin Y [Source:HGNC Symbol;Acc:HGNC:23354]	-2.65303	6.67013	1.06467e-17	1.31699e-15	Down-regulated
ENSG00000140386	SCAPER	S-phase cyclin A associated protein in the ER [Source:HGNC Symbol;Acc:HGNC:13081]	-4.01471	4.19904	1.19391e-17	1.45831e-15	Down-regulated
ENSG00000158865	SLC5A11	solute carrier family 5 member 11 [Source:HGNC Symbol;Acc:HGNC:23091]	-3.7349	4.4747	1.19507e-17	1.45831e-15	Down-regulated
ENSG00000118007	STAG1	stromal antigen 1 [Source:HGNC Symbol;Acc:HGNC:11354]	-2.91138	5.01964	1.25282e-17	1.51852e-15	Down-regulated
ENSG00000113083	LOX	lysyl oxidase [Source:HGNC Symbol;Acc:HGNC:6664]	-2.68135	8.96798	1.31638e-17	1.58492e-15	Down-regulated
ENSG00000165868	HSPA12A	heat shock protein family A (Hsp70) member 12A [Source:HGNC Symbol;Acc:HGNC:19022]	-2.88063	3.81591	1.34147e-17	1.59722e-15	Down-regulated
ENSG00000137575	SDCBP	syndecan binding protein [Source:HGNC Symbol;Acc:HGNC:10662]	2.39401	7.55333	1.35259e-17	1.59722e-15	Up-regulated
ENSG00000101464	PIGU	phosphatidylinositol glycan anchor biosynthesis class U [Source:HGNC Symbol;Acc:HGNC:15791]	-2.32678	5.62403	1.35313e-17	1.59722e-15	Down-regulated
ENSG00000082068	WDR70	WD repeat domain 70 [Source:HGNC Symbol;Acc:HGNC:25495]	-3.02056	4.62114	1.40139e-17	1.64345e-15	Down-regulated
ENSG00000152127	MGAT5	alpha-1,6-mannosylglycoprotein 6-beta-N-acetylglucosaminyltransferase [Source:HGNC Symbol;Acc:HGNC:7049]	-4.31638	5.98024	1.44198e-17	1.68014e-15	Down-regulated
ENSG00000198373	WWP2	WW domain containing E3 ubiquitin protein ligase 2 [Source:HGNC Symbol;Acc:HGNC:16804]	-3.57216	5.20561	1.46281e-17	1.69348e-15	Down-regulated
ENSG00000166575	TMEM135	transmembrane protein 135 [Source:HGNC Symbol;Acc:HGNC:26167]	-3.04052	6.05931	1.53406e-17	1.76466e-15	Down-regulated
ENSG00000131558	EXOC4	exocyst complex component 4 [Source:HGNC Symbol;Acc:HGNC:30389]	-3.84683	5.7476	1.62063e-17	1.85245e-15	Down-regulated
ENSG00000164808	SPIDR	scaffold protein involved in DNA repair [Source:HGNC Symbol;Acc:HGNC:28971]	-3.73539	3.91451	1.72391e-17	1.9581e-15	Down-regulated
ENSG00000169906	S100G	S100 calcium binding protein G [Source:HGNC Symbol;Acc:HGNC:1436]	-3.99155	5.48606	1.79688e-17	2.02822e-15	Down-regulated
ENSG00000117298	ECE1	endothelin converting enzyme 1 [Source:HGNC Symbol;Acc:HGNC:3146]	-2.42401	6.70451	1.86365e-17	2.08301e-15	Down-regulated
ENSG00000144036	EXOC6B	exocyst complex component 6B [Source:HGNC Symbol;Acc:HGNC:17085]	-3.23814	4.57364	1.86848e-17	2.08301e-15	Down-regulated
ENSG00000141627	DYM	dymeclin [Source:HGNC Symbol;Acc:HGNC:21317]	-3.44568	4.36484	2.11289e-17	2.34103e-15	Down-regulated
ENSG00000196405	EVL	Enah/Vasp-like [Source:HGNC Symbol;Acc:HGNC:20234]	-3.84788	4.39648	2.27206e-17	2.49013e-15	Down-regulated
ENSG00000162949	CAPN13	calpain 13 [Source:HGNC Symbol;Acc:HGNC:16663]	-3.27427	4.38211	2.28397e-17	2.49013e-15	Down-regulated
ENSG00000219545	UMAD1	UBAP1-MVB12-associated (UMA) domain containing 1 [Source:HGNC Symbol;Acc:HGNC:48955]	-2.82707	3.4967	2.28883e-17	2.49013e-15	Down-regulated
ENSG00000151090	THRB	thyroid hormone receptor beta [Source:HGNC Symbol;Acc:HGNC:11799]	-3.76066	6.07093	2.34099e-17	2.53164e-15	Down-regulated
ENSG00000126217	MCF2L	MCF.2 cell line derived transforming sequence like [Source:HGNC Symbol;Acc:HGNC:14576]	-3.32965	4.6681	2.39534e-17	2.57499e-15	Down-regulated
ENSG00000063322	MED29	mediator complex subunit 29 [Source:HGNC Symbol;Acc:HGNC:23074]	1.63971	6.87307	2.42403e-17	2.59041e-15	Up-regulated
ENSG00000071205	ARHGAP10	Rho GTPase activating protein 10 [Source:HGNC Symbol;Acc:HGNC:26099]	-3.70045	3.87929	2.47226e-17	2.62642e-15	Down-regulated
ENSG00000107249	GLIS3	GLIS family zinc finger 3 [Source:HGNC Symbol;Acc:HGNC:28510]	-3.90473	3.49296	2.54097e-17	2.68362e-15	Down-regulated
ENSG00000123106	CCDC91	coiled-coil domain containing 91 [Source:HGNC Symbol;Acc:HGNC:24855]	-3.46104	3.80285	2.73569e-17	2.86777e-15	Down-regulated
ENSG00000129636	ITFG1	integrin alpha FG-GAP repeat containing 1 [Source:HGNC Symbol;Acc:HGNC:30697]	-2.11845	6.65209	2.74893e-17	2.86777e-15	Down-regulated
ENSG00000188352	FOCAD	focadhesin [Source:HGNC Symbol;Acc:HGNC:23377]	-3.03572	4.17853	2.77829e-17	2.86777e-15	Down-regulated
ENSG00000196498	NCOR2	nuclear receptor corepressor 2 [Source:HGNC Symbol;Acc:HGNC:7673]	-2.74858	4.96058	2.77915e-17	2.86777e-15	Down-regulated
ENSG00000126562	WNK4	WNK lysine deficient protein kinase 4 [Source:HGNC Symbol;Acc:HGNC:14544]	2.74736	6.30413	2.79473e-17	2.86777e-15	Up-regulated
ENSG00000065457	ADAT1	adenosine deaminase tRNA specific 1 [Source:HGNC Symbol;Acc:HGNC:228]	2.21551	5.07217	2.88607e-17	2.94313e-15	Up-regulated
ENSG00000185104	FAF1	Fas associated factor 1 [Source:HGNC Symbol;Acc:HGNC:3578]	-2.91477	4.92173	2.90076e-17	2.94313e-15	Down-regulated
ENSG00000116667	C1orf21	chromosome 1 open reading frame 21 [Source:HGNC Symbol;Acc:HGNC:15494]	-3.35465	4.82305	2.98514e-17	3.01182e-15	Down-regulated
ENSG00000166391	MOGAT2	monoacylglycerol O-acyltransferase 2 [Source:HGNC Symbol;Acc:HGNC:23248]	-4.75152	3.79105	3.02576e-17	3.03585e-15	Down-regulated
ENSG00000148498	PARD3	par-3 family cell polarity regulator [Source:HGNC Symbol;Acc:HGNC:16051]	-3.26322	6.01228	3.14783e-17	3.14087e-15	Down-regulated
ENSG00000134882	UBAC2	UBA domain containing 2 [Source:HGNC Symbol;Acc:HGNC:20486]	-2.4569	7.09642	3.22158e-17	3.1968e-15	Down-regulated
ENSG00000154556	SORBS2	sorbin and SH3 domain containing 2 [Source:HGNC Symbol;Acc:HGNC:24098]	-5.10605	4.39082	3.31792e-17	3.2744e-15	Down-regulated
ENSG00000108175	ZMIZ1	zinc finger MIZ-type containing 1 [Source:HGNC Symbol;Acc:HGNC:16493]	-2.44895	5.50198	3.41498e-17	3.35188e-15	Down-regulated
ENSG00000100170	SLC5A1	solute carrier family 5 member 1 [Source:HGNC Symbol;Acc:HGNC:11036]	-2.49788	5.89688	3.46621e-17	3.38377e-15	Down-regulated
ENSG00000109452	INPP4B	inositol polyphosphate-4-phosphatase type II B [Source:HGNC Symbol;Acc:HGNC:6075]	-6.18193	3.75956	3.54869e-17	3.43482e-15	Down-regulated
ENSG00000134247	PTGFRN	prostaglandin F2 receptor inhibitor [Source:HGNC Symbol;Acc:HGNC:9601]	-2.67865	4.21326	3.55654e-17	3.43482e-15	Down-regulated
ENSG00000047849	MAP4	microtubule associated protein 4 [Source:HGNC Symbol;Acc:HGNC:6862]	-2.491	7.03879	3.65732e-17	3.5067e-15	Down-regulated
ENSG00000141682	PMAIP1	phorbol-12-myristate-13-acetate-induced protein 1 [Source:HGNC Symbol;Acc:HGNC:9108]	6.16429	4.29815	3.6698e-17	3.5067e-15	Up-regulated
ENSG00000132670	PTPRA	protein tyrosine phosphatase receptor type A [Source:HGNC Symbol;Acc:HGNC:9664]	-2.30852	8.02993	3.92276e-17	3.72868e-15	Down-regulated
ENSG00000137819	PAQR5	progestin and adipoQ receptor family member 5 [Source:HGNC Symbol;Acc:HGNC:29645]	-3.13742	3.9529	4.0054e-17	3.78731e-15	Down-regulated
ENSG00000204682	MIR1915HG	MIR1915 host gene [Source:HGNC Symbol;Acc:HGNC:31448]	-2.93491	4.89949	4.03356e-17	3.79407e-15	Down-regulated
ENSG00000137478	FCHSD2	FCH and double SH3 domains 2 [Source:HGNC Symbol;Acc:HGNC:29114]	-3.70505	4.55301	4.14506e-17	3.87875e-15	Down-regulated
ENSG00000118217	ATF6	activating transcription factor 6 [Source:HGNC Symbol;Acc:HGNC:791]	-2.45903	5.62508	4.5491e-17	4.23489e-15	Down-regulated
ENSG00000143621	ILF2	interleukin enhancer binding factor 2 [Source:HGNC Symbol;Acc:HGNC:6037]	1.88645	8.29546	4.5767e-17	4.23873e-15	Up-regulated
ENSG00000129158	SERGEF	secretion regulating guanine nucleotide exchange factor [Source:HGNC Symbol;Acc:HGNC:17499]	-3.38607	2.73633	4.7045e-17	4.33486e-15	Down-regulated
ENSG00000053254	FOXN3	forkhead box N3 [Source:HGNC Symbol;Acc:HGNC:1928]	-4.05043	6.56821	4.79506e-17	4.37662e-15	Down-regulated
ENSG00000126524	SBDS	SBDS ribosome maturation factor [Source:HGNC Symbol;Acc:HGNC:19440]	1.63877	8.23601	4.82018e-17	4.37662e-15	Up-regulated
ENSG00000159842	ABR	ABR activator of RhoGEF and GTPase [Source:HGNC Symbol;Acc:HGNC:81]	-2.52153	6.3219	4.82253e-17	4.37662e-15	Down-regulated
ENSG00000171533	MAP6	microtubule associated protein 6 [Source:HGNC Symbol;Acc:HGNC:6868]	-3.79563	3.62471	4.92152e-17	4.44413e-15	Down-regulated
ENSG00000164597	COG5	component of oligomeric golgi complex 5 [Source:HGNC Symbol;Acc:HGNC:14857]	-2.97831	5.46116	5.05189e-17	4.53723e-15	Down-regulated
ENSG00000141564	RPTOR	regulatory associated protein of MTOR complex 1 [Source:HGNC Symbol;Acc:HGNC:30287]	-3.71738	3.7288	5.07486e-17	4.53723e-15	Down-regulated
ENSG00000103319	EEF2K	eukaryotic elongation factor 2 kinase [Source:HGNC Symbol;Acc:HGNC:24615]	-2.16883	6.31347	5.13938e-17	4.57228e-15	Down-regulated
ENSG00000196511	TPK1	thiamin pyrophosphokinase 1 [Source:HGNC Symbol;Acc:HGNC:17358]	-4.05162	2.53318	5.20758e-17	4.61024e-15	Down-regulated
ENSG00000064393	HIPK2	homeodomain interacting protein kinase 2 [Source:HGNC Symbol;Acc:HGNC:14402]	-4.3128	4.62191	5.47629e-17	4.82121e-15	Down-regulated
ENSG00000162542	TMCO4	transmembrane and coiled-coil domains 4 [Source:HGNC Symbol;Acc:HGNC:27393]	-2.85339	4.29139	5.49927e-17	4.82121e-15	Down-regulated
ENSG00000144455	SUMF1	sulfatase modifying factor 1 [Source:HGNC Symbol;Acc:HGNC:20376]	-2.33279	4.86419	5.59952e-17	4.88538e-15	Down-regulated
ENSG00000139289	PHLDA1	pleckstrin homology like domain family A member 1 [Source:HGNC Symbol;Acc:HGNC:8933]	3.37452	5.61704	5.69786e-17	4.94728e-15	Up-regulated
ENSG00000173482	PTPRM	protein tyrosine phosphatase receptor type M [Source:HGNC Symbol;Acc:HGNC:9675]	-4.19273	5.6425	5.83283e-17	5.04023e-15	Down-regulated
ENSG00000177614	PGBD5	piggyBac transposable element derived 5 [Source:HGNC Symbol;Acc:HGNC:19405]	-3.64055	3.99882	6.13161e-17	5.27318e-15	Down-regulated
ENSG00000099139	PCSK5	proprotein convertase subtilisin/kexin type 5 [Source:HGNC Symbol;Acc:HGNC:8747]	-2.98914	4.76755	6.2614e-17	5.35928e-15	Down-regulated
ENSG00000082438	COBLL1	cordon-bleu WH2 repeat protein like 1 [Source:HGNC Symbol;Acc:HGNC:23571]	-2.99211	5.82589	6.54503e-17	5.5681e-15	Down-regulated
ENSG00000085511	MAP3K4	mitogen-activated protein kinase kinase kinase 4 [Source:HGNC Symbol;Acc:HGNC:6856]	-2.74084	4.68908	6.56702e-17	5.5681e-15	Down-regulated
ENSG00000266074	BAHCC1	BAH domain and coiled-coil containing 1 [Source:HGNC Symbol;Acc:HGNC:29279]	-2.84623	4.09151	6.77372e-17	5.71651e-15	Down-regulated
ENSG00000179242	CDH4	cadherin 4 [Source:HGNC Symbol;Acc:HGNC:1763]	-4.81946	4.10423	6.8872e-17	5.78525e-15	Down-regulated
ENSG00000158169	FANCC	FA complementation group C [Source:HGNC Symbol;Acc:HGNC:3584]	-2.55438	4.12568	7.06188e-17	5.90452e-15	Down-regulated
ENSG00000172340	SUCLG2	succinate-CoA ligase GDP-forming subunit beta [Source:HGNC Symbol;Acc:HGNC:11450]	-2.16718	7.01829	7.38526e-17	6.14644e-15	Down-regulated
ENSG00000186350	RXRA	retinoid X receptor alpha [Source:HGNC Symbol;Acc:HGNC:10477]	-2.92044	5.83047	8.1559e-17	6.74497e-15	Down-regulated
ENSG00000079739	PGM1	phosphoglucomutase 1 [Source:HGNC Symbol;Acc:HGNC:8905]	-2.02614	6.80533	8.18505e-17	6.74497e-15	Down-regulated
ENSG00000120029	ARMH3	armadillo like helical domain containing 3 [Source:HGNC Symbol;Acc:HGNC:25788]	-2.71819	4.71584	8.21647e-17	6.74497e-15	Down-regulated
ENSG00000135540	NHSL1	NHS like 1 [Source:HGNC Symbol;Acc:HGNC:21021]	-2.49731	6.38995	8.81645e-17	7.20475e-15	Down-regulated
ENSG00000167721	TSR1	TSR1 ribosome maturation factor [Source:HGNC Symbol;Acc:HGNC:25542]	1.90785	6.95706	9.24287e-17	7.5192e-15	Up-regulated
ENSG00000166167	BTRC	beta-transducin repeat containing E3 ubiquitin protein ligase [Source:HGNC Symbol;Acc:HGNC:1144]	-2.99753	4.72913	9.35934e-17	7.5798e-15	Down-regulated
ENSG00000197157	SND1	staphylococcal nuclease and tudor domain containing 1 [Source:HGNC Symbol;Acc:HGNC:30646]	-2.7237	7.93888	9.5448e-17	7.6955e-15	Down-regulated
ENSG00000145349	CAMK2D	calcium/calmodulin dependent protein kinase II delta [Source:HGNC Symbol;Acc:HGNC:1462]	-3.26045	6.31406	9.58773e-17	7.69575e-15	Down-regulated
ENSG00000125257	ABCC4	ATP binding cassette subfamily C member 4 [Source:HGNC Symbol;Acc:HGNC:55]	-4.32628	4.30816	9.6608e-17	7.72009e-15	Down-regulated
ENSG00000165689	ENTR1	endosome associated trafficking regulator 1 [Source:HGNC Symbol;Acc:HGNC:10667]	1.86	5.89816	1.00223e-16	7.97371e-15	Up-regulated
ENSG00000185630	PBX1	PBX homeobox 1 [Source:HGNC Symbol;Acc:HGNC:8632]	-3.49249	6.34972	1.01012e-16	8.00121e-15	Down-regulated
ENSG00000165959	CLMN	calmin [Source:HGNC Symbol;Acc:HGNC:19972]	-3.75813	5.63571	1.04053e-16	8.20608e-15	Down-regulated
ENSG00000241973	PI4KA	phosphatidylinositol 4-kinase alpha [Source:HGNC Symbol;Acc:HGNC:8983]	-1.69745	6.12671	1.06312e-16	8.34779e-15	Down-regulated
ENSG00000113391	FAM172A	family with sequence similarity 172 member A [Source:HGNC Symbol;Acc:HGNC:25365]	-2.85305	4.57151	1.07319e-16	8.35641e-15	Down-regulated
ENSG00000079691	CARMIL1	capping protein regulator and myosin 1 linker 1 [Source:HGNC Symbol;Acc:HGNC:21581]	-2.86881	5.76967	1.07347e-16	8.35641e-15	Down-regulated
ENSG00000166689	PLEKHA7	pleckstrin homology domain containing A7 [Source:HGNC Symbol;Acc:HGNC:27049]	-1.94981	6.3084	1.07986e-16	8.37005e-15	Down-regulated
ENSG00000082805	ERC1	ELKS/RAB6-interacting/CAST family member 1 [Source:HGNC Symbol;Acc:HGNC:17072]	-3.82997	4.93478	1.0955e-16	8.45503e-15	Down-regulated
ENSG00000136040	PLXNC1	plexin C1 [Source:HGNC Symbol;Acc:HGNC:9106]	-5.58832	3.9936	1.10157e-16	8.46566e-15	Down-regulated
ENSG00000057935	MTA3	metastasis associated 1 family member 3 [Source:HGNC Symbol;Acc:HGNC:23784]	-2.41391	5.94553	1.11144e-16	8.50531e-15	Down-regulated
ENSG00000153904	DDAH1	dimethylarginine dimethylaminohydrolase 1 [Source:HGNC Symbol;Acc:HGNC:2715]	-2.51404	7.18916	1.15714e-16	8.81768e-15	Down-regulated
ENSG00000040341	STAU2	staufen double-stranded RNA binding protein 2 [Source:HGNC Symbol;Acc:HGNC:11371]	-3.327	4.75003	1.16839e-16	8.86601e-15	Down-regulated
ENSG00000082781	ITGB5	integrin subunit beta 5 [Source:HGNC Symbol;Acc:HGNC:6160]	-2.27472	5.84406	1.24935e-16	9.44072e-15	Down-regulated
ENSG00000172197	MBOAT1	membrane bound O-acyltransferase domain containing 1 [Source:HGNC Symbol;Acc:HGNC:21579]	-2.29083	5.07663	1.26817e-16	9.54299e-15	Down-regulated
ENSG00000115919	KYNU	kynureninase [Source:HGNC Symbol;Acc:HGNC:6469]	-4.37936	2.99835	1.28232e-16	9.60621e-15	Down-regulated
ENSG00000102893	PHKB	phosphorylase kinase regulatory subunit beta [Source:HGNC Symbol;Acc:HGNC:8927]	-2.23525	6.19856	1.28721e-16	9.60621e-15	Down-regulated
ENSG00000151229	SLC2A13	solute carrier family 2 member 13 [Source:HGNC Symbol;Acc:HGNC:15956]	-4.83798	3.38794	1.29996e-16	9.66146e-15	Down-regulated
ENSG00000172689	MS4A10	membrane spanning 4-domains A10 [Source:HGNC Symbol;Acc:HGNC:13368]	-3.17418	7.63559	1.30837e-16	9.68408e-15	Down-regulated
ENSG00000154310	TNIK	TRAF2 and NCK interacting kinase [Source:HGNC Symbol;Acc:HGNC:30765]	-4.71942	4.98367	1.32978e-16	9.80235e-15	Down-regulated
ENSG00000152894	PTPRK	protein tyrosine phosphatase receptor type K [Source:HGNC Symbol;Acc:HGNC:9674]	-3.56507	6.55197	1.34014e-16	9.83855e-15	Down-regulated
ENSG00000149177	PTPRJ	protein tyrosine phosphatase receptor type J [Source:HGNC Symbol;Acc:HGNC:9673]	-3.35632	6.00834	1.36939e-16	9.96422e-15	Down-regulated
ENSG00000144677	CTDSPL	CTD small phosphatase like [Source:HGNC Symbol;Acc:HGNC:16890]	-1.94637	6.40579	1.37349e-16	9.96422e-15	Down-regulated
ENSG00000212907	MT-ND4L	mitochondrially encoded NADH:ubiquinone oxidoreductase core subunit 4L [Source:HGNC Symbol;Acc:HGNC:7460]	-3.14364	10.2145	1.37381e-16	9.96422e-15	Down-regulated
ENSG00000203666	EFCAB2	EF-hand calcium binding domain 2 [Source:HGNC Symbol;Acc:HGNC:28166]	-3.21905	3.2067	1.37962e-16	9.96638e-15	Down-regulated
ENSG00000170430	MGMT	O-6-methylguanine-DNA methyltransferase [Source:HGNC Symbol;Acc:HGNC:7059]	-4.89638	3.52873	1.39336e-16	1.00255e-14	Down-regulated
ENSG00000148483	TMEM236	transmembrane protein 236 [Source:HGNC Symbol;Acc:HGNC:23473]	-3.23235	4.84681	1.39926e-16	1.0028e-14	Down-regulated
ENSG00000171617	ENC1	ectodermal-neural cortex 1 [Source:HGNC Symbol;Acc:HGNC:3345]	1.99688	7.26519	1.42431e-16	1.01672e-14	Up-regulated
ENSG00000112494	UNC93A	unc-93 homolog A [Source:HGNC Symbol;Acc:HGNC:12570]	-2.21881	4.09637	1.44782e-16	1.02943e-14	Down-regulated
ENSG00000166710	B2M	beta-2-microglobulin [Source:HGNC Symbol;Acc:HGNC:914]	1.51017	10.464	1.45858e-16	1.03302e-14	Up-regulated
ENSG00000171759	PAH	phenylalanine hydroxylase [Source:HGNC Symbol;Acc:HGNC:8582]	-3.39027	4.81572	1.48197e-16	1.04548e-14	Down-regulated
ENSG00000138430	OLA1	Obg like ATPase 1 [Source:HGNC Symbol;Acc:HGNC:28833]	-2.08074	7.15311	1.49506e-16	1.05061e-14	Down-regulated
ENSG00000162231	NXF1	nuclear RNA export factor 1 [Source:HGNC Symbol;Acc:HGNC:8071]	3.54682	8.81248	1.52233e-16	1.06428e-14	Up-regulated
ENSG00000112964	GHR	growth hormone receptor [Source:HGNC Symbol;Acc:HGNC:4263]	-6.23592	3.1807	1.53205e-16	1.06428e-14	Down-regulated
ENSG00000164574	GALNT10	polypeptide N-acetylgalactosaminyltransferase 10 [Source:HGNC Symbol;Acc:HGNC:19873]	-3.78873	3.5149	1.53237e-16	1.06428e-14	Down-regulated
ENSG00000100154	TTC28	tetratricopeptide repeat domain 28 [Source:HGNC Symbol;Acc:HGNC:29179]	-5.08326	2.57128	1.54133e-16	1.06428e-14	Down-regulated
ENSG00000038382	TRIO	trio Rho guanine nucleotide exchange factor [Source:HGNC Symbol;Acc:HGNC:12303]	-3.0837	5.78677	1.54397e-16	1.06428e-14	Down-regulated
ENSG00000112977	DAP	death associated protein [Source:HGNC Symbol;Acc:HGNC:2672]	-2.22046	6.17695	1.55874e-16	1.06709e-14	Down-regulated
ENSG00000084676	NCOA1	nuclear receptor coactivator 1 [Source:HGNC Symbol;Acc:HGNC:7668]	-3.29652	6.59716	1.55987e-16	1.06709e-14	Down-regulated
ENSG00000178764	ZHX2	zinc fingers and homeoboxes 2 [Source:HGNC Symbol;Acc:HGNC:18513]	-3.72831	3.44768	1.58321e-16	1.07898e-14	Down-regulated
ENSG00000165548	TMEM63C	transmembrane protein 63C [Source:HGNC Symbol;Acc:HGNC:23787]	-2.74386	3.86838	1.59965e-16	1.08608e-14	Down-regulated
ENSG00000156831	NSMCE2	NSE2 (MMS21) homolog, SMC5-SMC6 complex SUMO ligase [Source:HGNC Symbol;Acc:HGNC:26513]	-2.51404	3.59882	1.61102e-16	1.08965e-14	Down-regulated
ENSG00000108651	UTP6	UTP6 small subunit processome component [Source:HGNC Symbol;Acc:HGNC:18279]	2.10967	6.60265	1.61698e-16	1.08965e-14	Up-regulated
ENSG00000228253	MT-ATP8	mitochondrially encoded ATP synthase membrane subunit 8 [Source:HGNC Symbol;Acc:HGNC:7415]	-2.67783	9.04383	1.66019e-16	1.11461e-14	Down-regulated
ENSG00000144711	IQSEC1	IQ motif and Sec7 domain ArfGEF 1 [Source:HGNC Symbol;Acc:HGNC:29112]	-2.47778	5.10732	1.69627e-16	1.13461e-14	Down-regulated
ENSG00000144619	CNTN4	contactin 4 [Source:HGNC Symbol;Acc:HGNC:2174]	-6.13388	3.8533	1.70921e-16	1.13905e-14	Down-regulated
ENSG00000107902	LHPP	phospholysine phosphohistidine inorganic pyrophosphate phosphatase [Source:HGNC Symbol;Acc:HGNC:30042]	-5.68242	4.85071	1.74354e-16	1.15766e-14	Down-regulated
ENSG00000169398	PTK2	protein tyrosine kinase 2 [Source:HGNC Symbol;Acc:HGNC:9611]	-2.20246	6.56985	1.76659e-16	1.16494e-14	Down-regulated
ENSG00000111110	PPM1H	protein phosphatase, Mg2+/Mn2+ dependent 1H [Source:HGNC Symbol;Acc:HGNC:18583]	-2.41499	5.94177	1.7674e-16	1.16494e-14	Down-regulated
ENSG00000133195	SLC39A11	solute carrier family 39 member 11 [Source:HGNC Symbol;Acc:HGNC:14463]	-2.92359	4.27571	1.78671e-16	1.17338e-14	Down-regulated
ENSG00000172456	FGGY	FGGY carbohydrate kinase domain containing [Source:HGNC Symbol;Acc:HGNC:25610]	-5.37924	2.75562	1.79472e-16	1.17437e-14	Down-regulated
ENSG00000122574	WIPF3	WAS/WASL interacting protein family member 3 [Source:HGNC Symbol;Acc:HGNC:22004]	-2.5266	4.42819	1.8196e-16	1.18274e-14	Down-regulated
ENSG00000132549	VPS13B	vacuolar protein sorting 13 homolog B [Source:HGNC Symbol;Acc:HGNC:2183]	-3.8139	4.19582	1.82061e-16	1.18274e-14	Down-regulated
ENSG00000188825	LINC00910	long intergenic non-protein coding RNA 910 [Source:HGNC Symbol;Acc:HGNC:44361]	2.43444	5.70008	1.83852e-16	1.19009e-14	Up-regulated
ENSG00000157184	CPT2	carnitine palmitoyltransferase 2 [Source:HGNC Symbol;Acc:HGNC:2330]	1.75915	6.31718	1.8555e-16	1.1968e-14	Up-regulated
ENSG00000198886	MT-ND4	mitochondrially encoded NADH:ubiquinone oxidoreductase core subunit 4 [Source:HGNC Symbol;Acc:HGNC:7459]	-3.08309	14.0143	1.90305e-16	1.2231e-14	Down-regulated
ENSG00000184205	TSPYL2	TSPY like 2 [Source:HGNC Symbol;Acc:HGNC:24358]	3.15409	7.53046	1.92563e-16	1.23322e-14	Up-regulated
ENSG00000182771	GRID1	glutamate ionotropic receptor delta type subunit 1 [Source:HGNC Symbol;Acc:HGNC:4575]	-6.43614	2.8246	1.97172e-16	1.25828e-14	Down-regulated
ENSG00000198874	TYW1	tRNA-yW synthesizing protein 1 homolog [Source:HGNC Symbol;Acc:HGNC:25598]	-2.38522	4.31495	2.02109e-16	1.28524e-14	Down-regulated
ENSG00000084652	TXLNA	taxilin alpha [Source:HGNC Symbol;Acc:HGNC:30685]	1.85742	5.96989	2.02916e-16	1.28585e-14	Up-regulated
ENSG00000117834	SLC5A9	solute carrier family 5 member 9 [Source:HGNC Symbol;Acc:HGNC:22146]	-1.92155	7.37142	2.21482e-16	1.39859e-14	Down-regulated
ENSG00000137764	MAP2K5	mitogen-activated protein kinase kinase 5 [Source:HGNC Symbol;Acc:HGNC:6845]	-3.35792	3.79162	2.30236e-16	1.4488e-14	Down-regulated
ENSG00000128294	TPST2	tyrosylprotein sulfotransferase 2 [Source:HGNC Symbol;Acc:HGNC:12021]	-2.15545	4.95027	2.32365e-16	1.45712e-14	Down-regulated
ENSG00000197241	SLC2A7	solute carrier family 2 member 7 [Source:HGNC Symbol;Acc:HGNC:13445]	-4.74495	2.09888	2.34305e-16	1.4642e-14	Down-regulated
ENSG00000131015	ULBP2	UL16 binding protein 2 [Source:HGNC Symbol;Acc:HGNC:14894]	3.05242	4.79722	2.39132e-16	1.48922e-14	Up-regulated
ENSG00000049759	NEDD4L	NEDD4 like E3 ubiquitin protein ligase [Source:HGNC Symbol;Acc:HGNC:7728]	-1.88977	6.08704	2.4747e-16	1.53584e-14	Down-regulated
ENSG00000112983	BRD8	bromodomain containing 8 [Source:HGNC Symbol;Acc:HGNC:19874]	1.86125	7.12791	2.53364e-16	1.56487e-14	Up-regulated
ENSG00000175592	FOSL1	FOS like 1, AP-1 transcription factor subunit [Source:HGNC Symbol;Acc:HGNC:13718]	4.03274	3.80491	2.54283e-16	1.56487e-14	Up-regulated
ENSG00000130707	ASS1	argininosuccinate synthase 1 [Source:HGNC Symbol;Acc:HGNC:758]	-3.34479	7.22794	2.54746e-16	1.56487e-14	Down-regulated
ENSG00000033170	FUT8	fucosyltransferase 8 [Source:HGNC Symbol;Acc:HGNC:4019]	-2.65247	5.546	2.55839e-16	1.56625e-14	Down-regulated
ENSG00000230124	ACBD6	acyl-CoA binding domain containing 6 [Source:HGNC Symbol;Acc:HGNC:23339]	-2.37551	4.80457	2.60104e-16	1.58699e-14	Down-regulated
ENSG00000143919	CAMKMT	calmodulin-lysine N-methyltransferase [Source:HGNC Symbol;Acc:HGNC:26276]	-3.94091	2.7211	2.64764e-16	1.60998e-14	Down-regulated
ENSG00000158467	AHCYL2	adenosylhomocysteinase like 2 [Source:HGNC Symbol;Acc:HGNC:22204]	-2.9163	5.23156	2.66069e-16	1.61249e-14	Down-regulated
ENSG00000173530	TNFRSF10D	TNF receptor superfamily member 10d [Source:HGNC Symbol;Acc:HGNC:11907]	1.99866	7.16268	2.70442e-16	1.63298e-14	Up-regulated
ENSG00000119685	TTLL5	tubulin tyrosine ligase like 5 [Source:HGNC Symbol;Acc:HGNC:19963]	-2.43946	4.66641	2.7126e-16	1.63298e-14	Down-regulated
ENSG00000137103	TMEM8B	transmembrane protein 8B [Source:HGNC Symbol;Acc:HGNC:21427]	-2.12611	4.84396	2.84217e-16	1.7053e-14	Down-regulated
ENSG00000186834	HEXIM1	HEXIM P-TEFb complex subunit 1 [Source:HGNC Symbol;Acc:HGNC:24953]	3.16725	7.54921	2.87592e-16	1.71984e-14	Up-regulated
ENSG00000125246	CLYBL	citramalyl-CoA lyase [Source:HGNC Symbol;Acc:HGNC:18355]	-4.86693	3.04998	3.04685e-16	1.81604e-14	Down-regulated
ENSG00000107798	LIPA	lipase A, lysosomal acid type [Source:HGNC Symbol;Acc:HGNC:6617]	-1.61337	8.82104	3.19558e-16	1.89279e-14	Down-regulated
ENSG00000159267	HLCS	holocarboxylase synthetase [Source:HGNC Symbol;Acc:HGNC:4976]	-2.49026	4.25557	3.19658e-16	1.89279e-14	Down-regulated
ENSG00000150760	DOCK1	dedicator of cytokinesis 1 [Source:HGNC Symbol;Acc:HGNC:2987]	-3.26963	4.67883	3.25588e-16	1.91755e-14	Down-regulated
ENSG00000145982	FARS2	phenylalanyl-tRNA synthetase 2, mitochondrial [Source:HGNC Symbol;Acc:HGNC:21062]	-4.03468	2.58851	3.25962e-16	1.91755e-14	Down-regulated
ENSG00000197971	MBP	myelin basic protein [Source:HGNC Symbol;Acc:HGNC:6925]	-2.65866	4.37495	3.27879e-16	1.91818e-14	Down-regulated
ENSG00000103035	PSMD7	proteasome 26S subunit, non-ATPase 7 [Source:HGNC Symbol;Acc:HGNC:9565]	1.39937	8.31209	3.28314e-16	1.91818e-14	Up-regulated
ENSG00000154175	ABI3BP	ABI family member 3 binding protein [Source:HGNC Symbol;Acc:HGNC:17265]	-5.09856	5.91067	3.29255e-16	1.91818e-14	Down-regulated
ENSG00000196782	MAML3	mastermind like transcriptional coactivator 3 [Source:HGNC Symbol;Acc:HGNC:16272]	-2.64372	4.34795	3.30802e-16	1.92099e-14	Down-regulated
ENSG00000151689	INPP1	inositol polyphosphate-1-phosphatase [Source:HGNC Symbol;Acc:HGNC:6071]	2.04	6.63597	3.36863e-16	1.94992e-14	Up-regulated
ENSG00000198727	MT-CYB	mitochondrially encoded cytochrome b [Source:HGNC Symbol;Acc:HGNC:7427]	-2.88928	12.1496	3.40912e-16	1.96208e-14	Down-regulated
ENSG00000231312	MAP4K3-DT	MAP4K3 divergent transcript [Source:HGNC Symbol;Acc:HGNC:54056]	-2.52844	3.72956	3.41137e-16	1.96208e-14	Down-regulated
ENSG00000007062	PROM1	prominin 1 [Source:HGNC Symbol;Acc:HGNC:9454]	-3.47434	6.30282	3.43977e-16	1.97213e-14	Down-regulated
ENSG00000175115	PACS1	phosphofurin acidic cluster sorting protein 1 [Source:HGNC Symbol;Acc:HGNC:30032]	-2.12774	5.30728	3.48181e-16	1.98992e-14	Down-regulated
ENSG00000140443	IGF1R	insulin like growth factor 1 receptor [Source:HGNC Symbol;Acc:HGNC:5465]	-3.43946	4.78671	3.50278e-16	1.99121e-14	Down-regulated
ENSG00000086848	ALG9	ALG9 alpha-1,2-mannosyltransferase [Source:HGNC Symbol;Acc:HGNC:15672]	-2.56003	4.10497	3.51349e-16	1.99121e-14	Down-regulated
ENSG00000104324	CPQ	carboxypeptidase Q [Source:HGNC Symbol;Acc:HGNC:16910]	-2.30298	4.9276	3.51715e-16	1.99121e-14	Down-regulated
ENSG00000196284	SUPT3H	SPT3 homolog, SAGA and STAGA complex component [Source:HGNC Symbol;Acc:HGNC:11466]	-4.54989	3.20082	3.53503e-16	1.99508e-14	Down-regulated
ENSG00000147044	CASK	calcium/calmodulin dependent serine protein kinase [Source:HGNC Symbol;Acc:HGNC:1497]	-3.31047	6.91441	3.64553e-16	2.05104e-14	Down-regulated
ENSG00000058091	CDK14	cyclin dependent kinase 14 [Source:HGNC Symbol;Acc:HGNC:8883]	-5.70933	2.36067	3.66475e-16	2.05545e-14	Down-regulated
ENSG00000048991	R3HDM1	R3H domain containing 1 [Source:HGNC Symbol;Acc:HGNC:9757]	-2.13892	4.26919	3.68778e-16	2.06196e-14	Down-regulated
ENSG00000182919	C11orf54	chromosome 11 open reading frame 54 [Source:HGNC Symbol;Acc:HGNC:30204]	-1.92494	4.74468	3.79226e-16	2.11383e-14	Down-regulated
ENSG00000182621	PLCB1	phospholipase C beta 1 [Source:HGNC Symbol;Acc:HGNC:15917]	-3.54468	6.06297	3.84323e-16	2.13565e-14	Down-regulated
ENSG00000095637	SORBS1	sorbin and SH3 domain containing 1 [Source:HGNC Symbol;Acc:HGNC:14565]	-3.11042	7.41393	3.94135e-16	2.18346e-14	Down-regulated
ENSG00000067606	PRKCZ	protein kinase C zeta [Source:HGNC Symbol;Acc:HGNC:9412]	-2.1144	5.50529	4.01241e-16	2.21603e-14	Down-regulated
ENSG00000157216	SSBP3	single stranded DNA binding protein 3 [Source:HGNC Symbol;Acc:HGNC:15674]	-2.37803	4.95787	4.07759e-16	2.23654e-14	Down-regulated
ENSG00000072756	TRNT1	tRNA nucleotidyl transferase 1 [Source:HGNC Symbol;Acc:HGNC:17341]	2.09557	4.17978	4.08507e-16	2.23654e-14	Up-regulated
ENSG00000123643	SLC36A1	solute carrier family 36 member 1 [Source:HGNC Symbol;Acc:HGNC:18761]	-2.14917	9.10412	4.0867e-16	2.23654e-14	Down-regulated
ENSG00000158966	CACHD1	cache domain containing 1 [Source:HGNC Symbol;Acc:HGNC:29314]	-3.19015	4.45915	4.22088e-16	2.30299e-14	Down-regulated
ENSG00000075568	TMEM131	transmembrane protein 131 [Source:HGNC Symbol;Acc:HGNC:30366]	-2.4216	6.88674	4.32746e-16	2.35403e-14	Down-regulated
ENSG00000149260	CAPN5	calpain 5 [Source:HGNC Symbol;Acc:HGNC:1482]	-1.93543	5.84052	4.38814e-16	2.37987e-14	Down-regulated
ENSG00000150961	SEC24D	SEC24 homolog D, COPII coat complex component [Source:HGNC Symbol;Acc:HGNC:10706]	-2.31342	5.19156	4.46107e-16	2.41218e-14	Down-regulated
ENSG00000196352	CD55	CD55 molecule (Cromer blood group) [Source:HGNC Symbol;Acc:HGNC:2665]	2.35906	7.09041	4.50146e-16	2.42676e-14	Up-regulated
ENSG00000198624	CCDC69	coiled-coil domain containing 69 [Source:HGNC Symbol;Acc:HGNC:24487]	-2.35761	6.65057	4.62709e-16	2.48706e-14	Down-regulated
ENSG00000054219	LY75	lymphocyte antigen 75 [Source:HGNC Symbol;Acc:HGNC:6729]	-2.50731	5.51923	4.64687e-16	2.49028e-14	Down-regulated
ENSG00000146776	ATXN7L1	ataxin 7 like 1 [Source:HGNC Symbol;Acc:HGNC:22210]	-2.48426	4.16287	4.67148e-16	2.49606e-14	Down-regulated
ENSG00000111678	C12orf57	chromosome 12 open reading frame 57 [Source:HGNC Symbol;Acc:HGNC:29521]	4.43187	5.18884	4.77213e-16	2.54232e-14	Up-regulated
ENSG00000122870	BICC1	BicC family RNA binding protein 1 [Source:HGNC Symbol;Acc:HGNC:19351]	-3.36821	5.91338	4.91951e-16	2.61313e-14	Down-regulated
ENSG00000076555	ACACB	acetyl-CoA carboxylase beta [Source:HGNC Symbol;Acc:HGNC:85]	-3.04954	3.94772	4.95198e-16	2.62266e-14	Down-regulated
ENSG00000177570	SAMD12	sterile alpha motif domain containing 12 [Source:HGNC Symbol;Acc:HGNC:31750]	-4.49431	3.42917	4.9835e-16	2.63164e-14	Down-regulated
ENSG00000169372	CRADD	CASP2 and RIPK1 domain containing adaptor with death domain [Source:HGNC Symbol;Acc:HGNC:2340]	-3.49212	2.89589	5.03495e-16	2.64607e-14	Down-regulated
ENSG00000197442	MAP3K5	mitogen-activated protein kinase kinase kinase 5 [Source:HGNC Symbol;Acc:HGNC:6857]	-4.16575	3.14789	5.04014e-16	2.64607e-14	Down-regulated
ENSG00000117266	CDK18	cyclin dependent kinase 18 [Source:HGNC Symbol;Acc:HGNC:8751]	-2.20398	6.5999	5.12102e-16	2.68074e-14	Down-regulated
ENSG00000182481	KPNA2	karyopherin subunit alpha 2 [Source:HGNC Symbol;Acc:HGNC:6395]	1.85641	6.5022	5.28276e-16	2.75742e-14	Up-regulated
ENSG00000185420	SMYD3	SET and MYND domain containing 3 [Source:HGNC Symbol;Acc:HGNC:15513]	-5.02525	3.40731	5.3509e-16	2.78493e-14	Down-regulated
ENSG00000156471	PTDSS1	phosphatidylserine synthase 1 [Source:HGNC Symbol;Acc:HGNC:9587]	-1.94701	6.94746	5.36966e-16	2.78667e-14	Down-regulated
ENSG00000142611	PRDM16	PR/SET domain 16 [Source:HGNC Symbol;Acc:HGNC:14000]	-5.38462	2.00285	5.42166e-16	2.80559e-14	Down-regulated
ENSG00000145730	PAM	peptidylglycine alpha-amidating monooxygenase [Source:HGNC Symbol;Acc:HGNC:8596]	-2.29282	9.21542	5.53643e-16	2.8568e-14	Down-regulated
ENSG00000121858	TNFSF10	TNF superfamily member 10 [Source:HGNC Symbol;Acc:HGNC:11925]	-2.85075	6.10852	5.57102e-16	2.86258e-14	Down-regulated
ENSG00000196943	NOP9	NOP9 nucleolar protein [Source:HGNC Symbol;Acc:HGNC:19826]	1.65361	6.48695	5.59164e-16	2.86258e-14	Up-regulated
ENSG00000184178	SCFD2	sec1 family domain containing 2 [Source:HGNC Symbol;Acc:HGNC:30676]	-4.39398	1.96006	5.59518e-16	2.86258e-14	Down-regulated
ENSG00000082397	EPB41L3	erythrocyte membrane protein band 4.1 like 3 [Source:HGNC Symbol;Acc:HGNC:3380]	-5.32907	3.30479	5.61336e-16	2.86377e-14	Down-regulated
ENSG00000181090	EHMT1	euchromatic histone lysine methyltransferase 1 [Source:HGNC Symbol;Acc:HGNC:24650]	-1.86765	4.5044	5.63921e-16	2.86885e-14	Down-regulated
ENSG00000163625	WDFY3	WD repeat and FYVE domain containing 3 [Source:HGNC Symbol;Acc:HGNC:20751]	-2.80003	5.17609	5.68647e-16	2.88476e-14	Down-regulated
ENSG00000054282	SDCCAG8	SHH signaling and ciliogenesis regulator SDCCAG8 [Source:HGNC Symbol;Acc:HGNC:10671]	-2.281	3.76823	5.75205e-16	2.90037e-14	Down-regulated
ENSG00000112763	BTN2A1	butyrophilin subfamily 2 member A1 [Source:HGNC Symbol;Acc:HGNC:1136]	1.54379	6.01656	5.76715e-16	2.90037e-14	Up-regulated
ENSG00000081087	OSTM1	osteoclastogenesis associated transmembrane protein 1 [Source:HGNC Symbol;Acc:HGNC:21652]	1.92956	4.64375	5.77135e-16	2.90037e-14	Up-regulated
ENSG00000120709	FAM53C	family with sequence similarity 53 member C [Source:HGNC Symbol;Acc:HGNC:1336]	2.20001	6.80749	5.78148e-16	2.90037e-14	Up-regulated
ENSG00000204219	TCEA3	transcription elongation factor A3 [Source:HGNC Symbol;Acc:HGNC:11615]	-2.62949	4.97859	5.89304e-16	2.94406e-14	Down-regulated
ENSG00000117616	RSRP1	arginine and serine rich protein 1 [Source:HGNC Symbol;Acc:HGNC:25234]	3.29882	6.85729	5.90117e-16	2.94406e-14	Up-regulated
ENSG00000113070	HBEGF	heparin binding EGF like growth factor [Source:HGNC Symbol;Acc:HGNC:3059]	5.59293	5.77448	5.92748e-16	2.94647e-14	Up-regulated
ENSG00000011376	LARS2	leucyl-tRNA synthetase 2, mitochondrial [Source:HGNC Symbol;Acc:HGNC:17095]	-2.20989	4.27413	5.93862e-16	2.94647e-14	Down-regulated
ENSG00000101871	MID1	midline 1 [Source:HGNC Symbol;Acc:HGNC:7095]	-1.86837	6.46638	6.01219e-16	2.9748e-14	Down-regulated
ENSG00000173559	NABP1	nucleic acid binding protein 1 [Source:HGNC Symbol;Acc:HGNC:26232]	2.46134	7.31677	6.05527e-16	2.98793e-14	Up-regulated
ENSG00000118600	RXYLT1	ribitol xylosyltransferase 1 [Source:HGNC Symbol;Acc:HGNC:13530]	2.53645	3.95682	6.10802e-16	3.00574e-14	Up-regulated
ENSG00000166869	CHP2	calcineurin like EF-hand protein 2 [Source:HGNC Symbol;Acc:HGNC:24927]	-2.44401	6.70544	6.17266e-16	3.0293e-14	Down-regulated
ENSG00000249948	GBA3	glucosylceramidase beta 3 (gene/pseudogene) [Source:HGNC Symbol;Acc:HGNC:19069]	-4.06205	5.21622	6.28289e-16	3.07504e-14	Down-regulated
ENSG00000146038	DCDC2	doublecortin domain containing 2 [Source:HGNC Symbol;Acc:HGNC:18141]	-2.47167	4.65241	6.39739e-16	3.12262e-14	Down-regulated
ENSG00000163191	S100A11	S100 calcium binding protein A11 [Source:HGNC Symbol;Acc:HGNC:10488]	2.19135	7.39074	6.43853e-16	3.13423e-14	Up-regulated
ENSG00000117586	TNFSF4	TNF superfamily member 4 [Source:HGNC Symbol;Acc:HGNC:11934]	-4.45616	3.9787	6.47097e-16	3.14155e-14	Down-regulated
ENSG00000152217	SETBP1	SET binding protein 1 [Source:HGNC Symbol;Acc:HGNC:15573]	-4.98643	3.75043	6.5917e-16	3.19159e-14	Down-regulated
ENSG00000204978	ERICH4	glutamate rich 4 [Source:HGNC Symbol;Acc:HGNC:34497]	-2.53386	6.37563	6.64132e-16	3.20701e-14	Down-regulated
ENSG00000143093	STRIP1	striatin interacting protein 1 [Source:HGNC Symbol;Acc:HGNC:25916]	1.68982	5.19771	6.68136e-16	3.21774e-14	Up-regulated
ENSG00000197386	HTT	huntingtin [Source:HGNC Symbol;Acc:HGNC:4851]	-2.03089	5.3227	6.71271e-16	3.22424e-14	Down-regulated
ENSG00000198915	RASGEF1A	RasGEF domain family member 1A [Source:HGNC Symbol;Acc:HGNC:24246]	-5.41123	1.51105	6.73998e-16	3.22875e-14	Down-regulated
ENSG00000140987	ZSCAN32	zinc finger and SCAN domain containing 32 [Source:HGNC Symbol;Acc:HGNC:20812]	1.61047	4.97838	6.93468e-16	3.30846e-14	Up-regulated
ENSG00000187535	IFT140	intraflagellar transport 140 [Source:HGNC Symbol;Acc:HGNC:29077]	-3.15609	3.3975	6.94299e-16	3.30846e-14	Down-regulated
ENSG00000128487	SPECC1	sperm antigen with calponin homology and coiled-coil domains 1 [Source:HGNC Symbol;Acc:HGNC:30615]	-2.01379	5.54797	6.97678e-16	3.3158e-14	Down-regulated
ENSG00000154269	ENPP3	ectonucleotide pyrophosphatase/phosphodiesterase 3 [Source:HGNC Symbol;Acc:HGNC:3358]	-2.49095	3.98456	7.00586e-16	3.32089e-14	Down-regulated
ENSG00000130830	MPP1	membrane palmitoylated protein 1 [Source:HGNC Symbol;Acc:HGNC:7219]	-2.03014	5.79319	7.02684e-16	3.32211e-14	Down-regulated
ENSG00000151240	DIP2C	disco interacting protein 2 homolog C [Source:HGNC Symbol;Acc:HGNC:29150]	-3.23235	3.53003	7.08128e-16	3.33911e-14	Down-regulated
ENSG00000184903	IMMP2L	inner mitochondrial membrane peptidase subunit 2 [Source:HGNC Symbol;Acc:HGNC:14598]	-4.4977	3.52018	7.38154e-16	3.47163e-14	Down-regulated
ENSG00000157064	NMNAT2	nicotinamide nucleotide adenylyltransferase 2 [Source:HGNC Symbol;Acc:HGNC:16789]	-2.46152	4.99711	7.45906e-16	3.49898e-14	Down-regulated
ENSG00000143891	GALM	galactose mutarotase [Source:HGNC Symbol;Acc:HGNC:24063]	-2.55596	7.9731	7.51893e-16	3.51792e-14	Down-regulated
ENSG00000011105	TSPAN9	tetraspanin 9 [Source:HGNC Symbol;Acc:HGNC:21640]	-3.48253	4.54472	7.56693e-16	3.53123e-14	Down-regulated
ENSG00000128731	HERC2	HECT and RLD domain containing E3 ubiquitin protein ligase 2 [Source:HGNC Symbol;Acc:HGNC:4868]	-2.06895	5.40446	7.59507e-16	3.53523e-14	Down-regulated
ENSG00000175183	CSRP2	cysteine and glycine rich protein 2 [Source:HGNC Symbol;Acc:HGNC:2470]	-2.39767	4.05593	7.73914e-16	3.59303e-14	Down-regulated
ENSG00000245080	MIR3150BHG	MIR3150B host gene [Source:HGNC Symbol;Acc:HGNC:52000]	-3.12835	3.71812	7.91229e-16	3.664e-14	Down-regulated
ENSG00000064787	BCAS1	brain enriched myelin associated protein 1 [Source:HGNC Symbol;Acc:HGNC:974]	-3.54219	3.51494	8.03551e-16	3.71154e-14	Down-regulated
ENSG00000085721	RRN3	RRN3 homolog, RNA polymerase I transcription factor [Source:HGNC Symbol;Acc:HGNC:30346]	1.67235	6.50385	8.0802e-16	3.72266e-14	Up-regulated
ENSG00000151348	EXT2	exostosin glycosyltransferase 2 [Source:HGNC Symbol;Acc:HGNC:3513]	-1.95825	5.78743	8.24562e-16	3.78403e-14	Down-regulated
ENSG00000135917	SLC19A3	solute carrier family 19 member 3 [Source:HGNC Symbol;Acc:HGNC:16266]	-2.63682	7.66786	8.2553e-16	3.78403e-14	Down-regulated
ENSG00000251637	LINC02754	long intergenic non-protein coding RNA 2754 [Source:HGNC Symbol;Acc:HGNC:54274]	-2.53263	5.21003	8.28392e-16	3.78753e-14	Down-regulated
ENSG00000124406	ATP8A1	ATPase phospholipid transporting 8A1 [Source:HGNC Symbol;Acc:HGNC:13531]	-3.47272	5.63984	8.50863e-16	3.8643e-14	Down-regulated
ENSG00000112394	SLC16A10	solute carrier family 16 member 10 [Source:HGNC Symbol;Acc:HGNC:17027]	-3.71266	4.68166	8.51405e-16	3.8643e-14	Down-regulated
ENSG00000145996	CDKAL1	CDK5 regulatory subunit associated protein 1 like 1 [Source:HGNC Symbol;Acc:HGNC:21050]	-3.21279	3.76051	8.51601e-16	3.8643e-14	Down-regulated
ENSG00000166974	MAPRE2	microtubule associated protein RP/EB family member 2 [Source:HGNC Symbol;Acc:HGNC:6891]	-2.5447	4.42541	8.75211e-16	3.96148e-14	Down-regulated
ENSG00000136861	CDK5RAP2	CDK5 regulatory subunit associated protein 2 [Source:HGNC Symbol;Acc:HGNC:18672]	-1.98205	5.40884	8.82356e-16	3.98384e-14	Down-regulated
ENSG00000137177	KIF13A	kinesin family member 13A [Source:HGNC Symbol;Acc:HGNC:14566]	-3.55867	4.90022	8.95477e-16	4.03299e-14	Down-regulated
ENSG00000144724	PTPRG	protein tyrosine phosphatase receptor type G [Source:HGNC Symbol;Acc:HGNC:9671]	-4.43024	4.12412	9.13477e-16	4.10383e-14	Down-regulated
ENSG00000115946	PNO1	partner of NOB1 homolog [Source:HGNC Symbol;Acc:HGNC:32790]	1.80786	4.48612	9.4662e-16	4.23871e-14	Up-regulated
ENSG00000198840	MT-ND3	mitochondrially encoded NADH:ubiquinone oxidoreductase core subunit 3 [Source:HGNC Symbol;Acc:HGNC:7458]	-3.16724	10.2151	9.48195e-16	4.23871e-14	Down-regulated
ENSG00000165675	ENOX2	ecto-NOX disulfide-thiol exchanger 2 [Source:HGNC Symbol;Acc:HGNC:2259]	-3.33102	3.12516	9.65436e-16	4.29768e-14	Down-regulated
ENSG00000184985	SORCS2	sortilin related VPS10 domain containing receptor 2 [Source:HGNC Symbol;Acc:HGNC:16698]	-3.86677	3.87124	9.66145e-16	4.29768e-14	Down-regulated
ENSG00000115841	RMDN2	regulator of microtubule dynamics 2 [Source:HGNC Symbol;Acc:HGNC:26567]	-2.98881	2.45053	9.72509e-16	4.31536e-14	Down-regulated
ENSG00000162836	ACP6	acid phosphatase 6, lysophosphatidic [Source:HGNC Symbol;Acc:HGNC:29609]	-1.65365	5.87698	9.81095e-16	4.34279e-14	Down-regulated
ENSG00000088386	SLC15A1	solute carrier family 15 member 1 [Source:HGNC Symbol;Acc:HGNC:10920]	-2.51416	8.50561	9.90965e-16	4.37575e-14	Down-regulated
ENSG00000113719	ERGIC1	endoplasmic reticulum-golgi intermediate compartment 1 [Source:HGNC Symbol;Acc:HGNC:29205]	-2.38622	8.16094	1.01084e-15	4.45264e-14	Down-regulated
ENSG00000197548	ATG7	autophagy related 7 [Source:HGNC Symbol;Acc:HGNC:16935]	-3.26472	3.23102	1.0719e-15	4.69918e-14	Down-regulated
ENSG00000165895	ARHGAP42	Rho GTPase activating protein 42 [Source:HGNC Symbol;Acc:HGNC:26545]	-3.10326	5.46385	1.07202e-15	4.69918e-14	Down-regulated
ENSG00000153721	CNKSR3	CNKSR family member 3 [Source:HGNC Symbol;Acc:HGNC:23034]	-2.03439	5.33143	1.0987e-15	4.8045e-14	Down-regulated
ENSG00000152782	PANK1	pantothenate kinase 1 [Source:HGNC Symbol;Acc:HGNC:8598]	-2.59595	5.91815	1.1016e-15	4.80553e-14	Down-regulated
ENSG00000279086	0	TEC	8.37901	3.04417	1.11356e-15	4.84599e-14	Up-regulated
ENSG00000118707	TGIF2	TGFB induced factor homeobox 2 [Source:HGNC Symbol;Acc:HGNC:15764]	-1.81662	6.29506	1.13037e-15	4.90733e-14	Down-regulated
ENSG00000143595	AQP10	aquaporin 10 [Source:HGNC Symbol;Acc:HGNC:16029]	-2.40074	8.0545	1.14777e-15	4.97094e-14	Down-regulated
ENSG00000101361	NOP56	NOP56 ribonucleoprotein [Source:HGNC Symbol;Acc:HGNC:15911]	2.18294	7.85666	1.16102e-15	5.01628e-14	Up-regulated
ENSG00000116874	WARS2	tryptophanyl tRNA synthetase 2, mitochondrial [Source:HGNC Symbol;Acc:HGNC:12730]	-3.01914	3.5723	1.18066e-15	5.08897e-14	Down-regulated
ENSG00000155792	DEPTOR	DEP domain containing MTOR interacting protein [Source:HGNC Symbol;Acc:HGNC:22953]	-4.53592	3.48174	1.18455e-15	5.09316e-14	Down-regulated
ENSG00000166263	STXBP4	syntaxin binding protein 4 [Source:HGNC Symbol;Acc:HGNC:19694]	-3.06163	4.37517	1.18728e-15	5.09316e-14	Down-regulated
ENSG00000089057	SLC23A2	solute carrier family 23 member 2 [Source:HGNC Symbol;Acc:HGNC:10973]	-2.52218	4.33071	1.20121e-15	5.12896e-14	Down-regulated
ENSG00000144535	DIS3L2	DIS3 like 3'-5' exoribonuclease 2 [Source:HGNC Symbol;Acc:HGNC:28648]	-3.43115	2.90111	1.2013e-15	5.12896e-14	Down-regulated
ENSG00000088812	ATRN	attractin [Source:HGNC Symbol;Acc:HGNC:885]	-2.21703	8.09807	1.20894e-15	5.14942e-14	Down-regulated
ENSG00000138814	PPP3CA	protein phosphatase 3 catalytic subunit alpha [Source:HGNC Symbol;Acc:HGNC:9314]	-2.3108	5.19579	1.23343e-15	5.22954e-14	Down-regulated
ENSG00000174891	RSRC1	arginine and serine rich coiled-coil 1 [Source:HGNC Symbol;Acc:HGNC:24152]	-3.85762	3.49875	1.23355e-15	5.22954e-14	Down-regulated
ENSG00000169570	DTWD2	DTW domain containing 2 [Source:HGNC Symbol;Acc:HGNC:19334]	-4.76847	2.2806	1.24202e-15	5.25315e-14	Down-regulated
ENSG00000172115	CYCS	cytochrome c, somatic [Source:HGNC Symbol;Acc:HGNC:19986]	1.63759	7.32453	1.26619e-15	5.34284e-14	Up-regulated
ENSG00000171385	KCND3	potassium voltage-gated channel subfamily D member 3 [Source:HGNC Symbol;Acc:HGNC:6239]	-6.77363	1.8351	1.27509e-15	5.36787e-14	Down-regulated
ENSG00000103381	CPPED1	calcineurin like phosphoesterase domain containing 1 [Source:HGNC Symbol;Acc:HGNC:25632]	-3.13868	5.13363	1.28639e-15	5.40284e-14	Down-regulated
ENSG00000144040	SFXN5	sideroflexin 5 [Source:HGNC Symbol;Acc:HGNC:16073]	-2.80917	5.14344	1.32596e-15	5.55612e-14	Down-regulated
ENSG00000143324	XPR1	xenotropic and polytropic retrovirus receptor 1 [Source:HGNC Symbol;Acc:HGNC:12827]	-2.41114	5.63007	1.33272e-15	5.56162e-14	Down-regulated
ENSG00000187546	AGMO	alkylglycerol monooxygenase [Source:HGNC Symbol;Acc:HGNC:33784]	-5.99894	3.34869	1.33343e-15	5.56162e-14	Down-regulated
ENSG00000168952	STXBP6	syntaxin binding protein 6 [Source:HGNC Symbol;Acc:HGNC:19666]	-3.14494	3.59136	1.3451e-15	5.59735e-14	Down-regulated
ENSG00000111361	EIF2B1	eukaryotic translation initiation factor 2B subunit alpha [Source:HGNC Symbol;Acc:HGNC:3257]	1.4617	6.57511	1.37154e-15	5.69427e-14	Up-regulated
ENSG00000225329	LHFPL3-AS2	LHFPL3 antisense RNA 2 [Source:HGNC Symbol;Acc:HGNC:44106]	-2.80041	3.76467	1.37759e-15	5.70627e-14	Down-regulated
ENSG00000140025	EFCAB11	EF-hand calcium binding domain 11 [Source:HGNC Symbol;Acc:HGNC:20357]	-2.71142	2.93971	1.44377e-15	5.9667e-14	Down-regulated
ENSG00000107242	PIP5K1B	phosphatidylinositol-4-phosphate 5-kinase type 1 beta [Source:HGNC Symbol;Acc:HGNC:8995]	-3.05594	3.95603	1.51951e-15	6.26538e-14	Down-regulated
ENSG00000146648	EGFR	epidermal growth factor receptor [Source:HGNC Symbol;Acc:HGNC:3236]	-2.21631	7.2749	1.52761e-15	6.28444e-14	Down-regulated
ENSG00000148488	ST8SIA6	ST8 alpha-N-acetyl-neuraminide alpha-2,8-sialyltransferase 6 [Source:HGNC Symbol;Acc:HGNC:23317]	-3.04317	4.37105	1.53145e-15	6.28592e-14	Down-regulated
ENSG00000136205	TNS3	tensin 3 [Source:HGNC Symbol;Acc:HGNC:21616]	-2.37885	6.23228	1.56327e-15	6.40198e-14	Down-regulated
ENSG00000286733	LINC02348	long intergenic non-protein coding RNA 2348 [Source:NCBI gene (formerly Entrezgene);Acc:101927505]	-3.18649	5.66337	1.56892e-15	6.41057e-14	Down-regulated
ENSG00000100462	PRMT5	protein arginine methyltransferase 5 [Source:HGNC Symbol;Acc:HGNC:10894]	1.57116	6.79557	1.58034e-15	6.44265e-14	Up-regulated
ENSG00000143369	ECM1	extracellular matrix protein 1 [Source:HGNC Symbol;Acc:HGNC:3153]	3.23434	3.1807	1.64905e-15	6.70761e-14	Up-regulated
ENSG00000213901	SLC23A3	solute carrier family 23 member 3 [Source:HGNC Symbol;Acc:HGNC:20601]	-2.54735	5.6854	1.6909e-15	6.8624e-14	Down-regulated
ENSG00000273066	0	novel transcript	-2.87702	6.85346	1.71142e-15	6.93008e-14	Down-regulated
ENSG00000135469	COQ10A	coenzyme Q10A [Source:HGNC Symbol;Acc:HGNC:26515]	1.90119	4.27568	1.75275e-15	7.07147e-14	Up-regulated
ENSG00000067992	PDK3	pyruvate dehydrogenase kinase 3 [Source:HGNC Symbol;Acc:HGNC:8811]	-2.4962	5.31528	1.75416e-15	7.07147e-14	Down-regulated
ENSG00000132359	RAP1GAP2	RAP1 GTPase activating protein 2 [Source:HGNC Symbol;Acc:HGNC:29176]	-1.56957	6.13848	1.76266e-15	7.0899e-14	Down-regulated
ENSG00000100599	RIN3	Ras and Rab interactor 3 [Source:HGNC Symbol;Acc:HGNC:18751]	-4.02845	3.68679	1.78714e-15	7.17239e-14	Down-regulated
ENSG00000107263	RAPGEF1	Rap guanine nucleotide exchange factor 1 [Source:HGNC Symbol;Acc:HGNC:4568]	-1.82472	5.90427	1.85196e-15	7.41604e-14	Down-regulated
ENSG00000129151	BBOX1	gamma-butyrobetaine hydroxylase 1 [Source:HGNC Symbol;Acc:HGNC:964]	-3.6188	2.87672	1.87537e-15	7.49318e-14	Down-regulated
ENSG00000164181	ELOVL7	ELOVL fatty acid elongase 7 [Source:HGNC Symbol;Acc:HGNC:26292]	-2.32672	5.51953	1.88159e-15	7.50143e-14	Down-regulated
ENSG00000172183	ISG20	interferon stimulated exonuclease gene 20 [Source:HGNC Symbol;Acc:HGNC:6130]	4.22141	2.55494	1.91224e-15	7.60684e-14	Up-regulated
ENSG00000064999	ANKS1A	ankyrin repeat and sterile alpha motif domain containing 1A [Source:HGNC Symbol;Acc:HGNC:20961]	-1.73689	5.67496	1.94198e-15	7.70817e-14	Down-regulated
ENSG00000047230	CTPS2	CTP synthase 2 [Source:HGNC Symbol;Acc:HGNC:2520]	-2.20661	5.40599	1.95547e-15	7.73282e-14	Down-regulated
ENSG00000288612	0	novel transcript	3.85268	1.58023	1.95675e-15	7.73282e-14	Up-regulated
ENSG00000149948	HMGA2	high mobility group AT-hook 2 [Source:HGNC Symbol;Acc:HGNC:5009]	-2.44571	5.38811	1.97415e-15	7.78452e-14	Down-regulated
ENSG00000111271	ACAD10	acyl-CoA dehydrogenase family member 10 [Source:HGNC Symbol;Acc:HGNC:21597]	-1.64246	5.30205	2.00046e-15	7.87111e-14	Down-regulated
ENSG00000138231	DBR1	debranching RNA lariats 1 [Source:HGNC Symbol;Acc:HGNC:15594]	1.80524	4.72678	2.01323e-15	7.90413e-14	Up-regulated
ENSG00000163032	VSNL1	visinin like 1 [Source:HGNC Symbol;Acc:HGNC:12722]	-3.7547	5.88416	2.03664e-15	7.97868e-14	Down-regulated
ENSG00000101849	TBL1X	transducin beta like 1 X-linked [Source:HGNC Symbol;Acc:HGNC:11585]	-2.09857	5.16688	2.09312e-15	8.18219e-14	Down-regulated
ENSG00000213047	DENND1B	DENN domain containing 1B [Source:HGNC Symbol;Acc:HGNC:28404]	-2.92253	3.79516	2.13466e-15	8.32656e-14	Down-regulated
ENSG00000113048	MRPS27	mitochondrial ribosomal protein S27 [Source:HGNC Symbol;Acc:HGNC:14512]	-1.62233	6.76581	2.15128e-15	8.37329e-14	Down-regulated
ENSG00000183840	GPR39	G protein-coupled receptor 39 [Source:HGNC Symbol;Acc:HGNC:4496]	-3.80267	3.71755	2.23872e-15	8.68031e-14	Down-regulated
ENSG00000178573	MAF	MAF bZIP transcription factor [Source:HGNC Symbol;Acc:HGNC:6776]	-2.25724	8.92605	2.23977e-15	8.68031e-14	Down-regulated
ENSG00000107957	SH3PXD2A	SH3 and PX domains 2A [Source:HGNC Symbol;Acc:HGNC:23664]	-2.99881	4.45937	2.25995e-15	8.73977e-14	Down-regulated
ENSG00000204472	AIF1	allograft inflammatory factor 1 [Source:HGNC Symbol;Acc:HGNC:352]	-2.84871	3.41783	2.28861e-15	8.83168e-14	Down-regulated
ENSG00000163638	ADAMTS9	ADAM metallopeptidase with thrombospondin type 1 motif 9 [Source:HGNC Symbol;Acc:HGNC:13202]	-3.11844	3.37176	2.35492e-15	9.06819e-14	Down-regulated
ENSG00000107815	TWNK	twinkle mtDNA helicase [Source:HGNC Symbol;Acc:HGNC:1160]	2.25812	4.91558	2.36515e-15	9.07445e-14	Up-regulated
ENSG00000113273	ARSB	arylsulfatase B [Source:HGNC Symbol;Acc:HGNC:714]	-3.677	3.20236	2.36659e-15	9.07445e-14	Down-regulated
ENSG00000140262	TCF12	transcription factor 12 [Source:HGNC Symbol;Acc:HGNC:11623]	-2.64703	5.48974	2.38976e-15	9.14386e-14	Down-regulated
ENSG00000069702	TGFBR3	transforming growth factor beta receptor 3 [Source:HGNC Symbol;Acc:HGNC:11774]	-3.07192	5.67458	2.41296e-15	9.20886e-14	Down-regulated
ENSG00000140092	FBLN5	fibulin 5 [Source:HGNC Symbol;Acc:HGNC:3602]	-3.30976	4.28284	2.41694e-15	9.20886e-14	Down-regulated
ENSG00000073417	PDE8A	phosphodiesterase 8A [Source:HGNC Symbol;Acc:HGNC:8793]	-1.90317	6.44352	2.43878e-15	9.27249e-14	Down-regulated
ENSG00000187764	SEMA4D	semaphorin 4D [Source:HGNC Symbol;Acc:HGNC:10732]	-2.52772	3.19146	2.45211e-15	9.30361e-14	Down-regulated
ENSG00000173597	SULT1B1	sulfotransferase family 1B member 1 [Source:HGNC Symbol;Acc:HGNC:17845]	-3.75764	5.31334	2.48607e-15	9.41267e-14	Down-regulated
ENSG00000038945	MSR1	macrophage scavenger receptor 1 [Source:HGNC Symbol;Acc:HGNC:7376]	-2.50255	6.49805	2.53273e-15	9.56929e-14	Down-regulated
ENSG00000138190	EXOC6	exocyst complex component 6 [Source:HGNC Symbol;Acc:HGNC:23196]	-2.5401	3.93479	2.5423e-15	9.58538e-14	Down-regulated
ENSG00000128849	CGNL1	cingulin like 1 [Source:HGNC Symbol;Acc:HGNC:25931]	-3.90524	3.45102	2.55475e-15	9.60295e-14	Down-regulated
ENSG00000104044	OCA2	OCA2 melanosomal transmembrane protein [Source:HGNC Symbol;Acc:HGNC:8101]	-5.74461	1.83366	2.5576e-15	9.60295e-14	Down-regulated
ENSG00000116922	C1orf109	chromosome 1 open reading frame 109 [Source:HGNC Symbol;Acc:HGNC:26039]	2.18014	4.13751	2.59614e-15	9.72744e-14	Up-regulated
ENSG00000145555	MYO10	myosin X [Source:HGNC Symbol;Acc:HGNC:7593]	-2.13849	5.47076	2.60731e-15	9.73771e-14	Down-regulated
ENSG00000148219	ASTN2	astrotactin 2 [Source:HGNC Symbol;Acc:HGNC:17021]	-3.28411	2.06235	2.60966e-15	9.73771e-14	Down-regulated
ENSG00000136943	CTSV	cathepsin V [Source:HGNC Symbol;Acc:HGNC:2538]	2.34114	7.07783	2.61572e-15	9.74018e-14	Up-regulated
ENSG00000165841	CYP2C19	cytochrome P450 family 2 subfamily C member 19 [Source:HGNC Symbol;Acc:HGNC:2621]	-2.39238	5.82917	2.63774e-15	9.80196e-14	Down-regulated
ENSG00000145781	COMMD10	COMM domain containing 10 [Source:HGNC Symbol;Acc:HGNC:30201]	-2.94971	3.1733	2.65534e-15	9.8471e-14	Down-regulated
ENSG00000167972	ABCA3	ATP binding cassette subfamily A member 3 [Source:HGNC Symbol;Acc:HGNC:33]	-2.77175	3.94751	2.70897e-15	1.00254e-13	Down-regulated
ENSG00000121691	CAT	catalase [Source:HGNC Symbol;Acc:HGNC:1516]	-1.71068	8.22997	2.73728e-15	1.01095e-13	Down-regulated
ENSG00000114805	PLCH1	phospholipase C eta 1 [Source:HGNC Symbol;Acc:HGNC:29185]	-4.45871	2.37017	2.76841e-15	1.02036e-13	Down-regulated
ENSG00000120915	EPHX2	epoxide hydrolase 2 [Source:HGNC Symbol;Acc:HGNC:3402]	-1.69231	7.00663	2.78689e-15	1.02508e-13	Down-regulated
ENSG00000107731	UNC5B	unc-5 netrin receptor B [Source:HGNC Symbol;Acc:HGNC:12568]	-2.00388	5.44409	2.80717e-15	1.02945e-13	Down-regulated
ENSG00000151422	FER	FER tyrosine kinase [Source:HGNC Symbol;Acc:HGNC:3655]	-3.21149	4.2591	2.81068e-15	1.02945e-13	Down-regulated
ENSG00000198839	ZNF277	zinc finger protein 277 [Source:HGNC Symbol;Acc:HGNC:13070]	-2.27969	4.60554	2.81594e-15	1.02945e-13	Down-regulated
ENSG00000153902	LGI4	leucine rich repeat LGI family member 4 [Source:HGNC Symbol;Acc:HGNC:18712]	-2.10553	8.82623	2.82606e-15	1.02945e-13	Down-regulated
ENSG00000110237	ARHGEF17	Rho guanine nucleotide exchange factor 17 [Source:HGNC Symbol;Acc:HGNC:21726]	-2.04865	5.94765	2.82727e-15	1.02945e-13	Down-regulated
ENSG00000127663	KDM4B	lysine demethylase 4B [Source:HGNC Symbol;Acc:HGNC:29136]	-2.31376	4.20928	2.84362e-15	1.03139e-13	Down-regulated
ENSG00000183682	BMP8A	bone morphogenetic protein 8a [Source:HGNC Symbol;Acc:HGNC:21650]	-3.05501	2.73523	2.84403e-15	1.03139e-13	Down-regulated
ENSG00000118922	KLF12	Kruppel like factor 12 [Source:HGNC Symbol;Acc:HGNC:6346]	-4.19005	3.37351	2.86998e-15	1.03871e-13	Down-regulated
ENSG00000125848	FLRT3	fibronectin leucine rich transmembrane protein 3 [Source:HGNC Symbol;Acc:HGNC:3762]	1.76403	6.28016	2.90688e-15	1.04996e-13	Up-regulated
ENSG00000197321	SVIL	supervillin [Source:HGNC Symbol;Acc:HGNC:11480]	-2.21883	5.43467	2.97425e-15	1.07216e-13	Down-regulated
ENSG00000184719	RNLS	renalase, FAD dependent amine oxidase [Source:HGNC Symbol;Acc:HGNC:25641]	-4.73548	1.81699	2.98527e-15	1.07398e-13	Down-regulated
ENSG00000139974	SLC38A6	solute carrier family 38 member 6 [Source:HGNC Symbol;Acc:HGNC:19863]	-2.23254	3.33452	3.03282e-15	1.08892e-13	Down-regulated
ENSG00000135365	PHF21A	PHD finger protein 21A [Source:HGNC Symbol;Acc:HGNC:24156]	-2.28613	5.16721	3.05591e-15	1.09503e-13	Down-regulated
ENSG00000132182	NUP210	nucleoporin 210 [Source:HGNC Symbol;Acc:HGNC:30052]	-2.11109	3.95795	3.06424e-15	1.09584e-13	Down-regulated
ENSG00000047457	CP	ceruloplasmin [Source:HGNC Symbol;Acc:HGNC:2295]	-2.73131	5.18965	3.08592e-15	1.10142e-13	Down-regulated
ENSG00000121101	TEX14	testis expressed 14, intercellular bridge forming factor [Source:HGNC Symbol;Acc:HGNC:11737]	5.44454	3.4355	3.14279e-15	1.1195e-13	Up-regulated
ENSG00000072401	UBE2D1	ubiquitin conjugating enzyme E2 D1 [Source:HGNC Symbol;Acc:HGNC:12474]	1.85805	5.2519	3.20081e-15	1.13793e-13	Up-regulated
ENSG00000196652	ZKSCAN5	zinc finger with KRAB and SCAN domains 5 [Source:HGNC Symbol;Acc:HGNC:12867]	1.79958	5.34772	3.27074e-15	1.1605e-13	Up-regulated
ENSG00000145782	ATG12	autophagy related 12 [Source:HGNC Symbol;Acc:HGNC:588]	1.72585	6.60176	3.30794e-15	1.1714e-13	Up-regulated
ENSG00000114455	HHLA2	HERV-H LTR-associating 2 [Source:HGNC Symbol;Acc:HGNC:4905]	-2.64725	8.1602	3.34506e-15	1.18223e-13	Down-regulated
ENSG00000239305	RNF103	ring finger protein 103 [Source:HGNC Symbol;Acc:HGNC:12859]	1.60973	6.95054	3.40665e-15	1.20164e-13	Up-regulated
ENSG00000236449	0	novel transcript, antisense to WIPF1 and CHRNA1	-2.86025	3.17267	3.43784e-15	1.21028e-13	Down-regulated
ENSG00000141576	RNF157	ring finger protein 157 [Source:HGNC Symbol;Acc:HGNC:29402]	-2.5695	5.084	3.4961e-15	1.2284e-13	Down-regulated
ENSG00000133315	MACROD1	mono-ADP ribosylhydrolase 1 [Source:HGNC Symbol;Acc:HGNC:29598]	-3.98955	3.40835	3.51688e-15	1.23275e-13	Down-regulated
ENSG00000068650	ATP11A	ATPase phospholipid transporting 11A [Source:HGNC Symbol;Acc:HGNC:13552]	-2.13661	7.12946	3.52213e-15	1.23275e-13	Down-regulated
ENSG00000166268	MYRFL	myelin regulatory factor like [Source:HGNC Symbol;Acc:HGNC:26316]	-2.90023	4.1906	3.56604e-15	1.2457e-13	Down-regulated
ENSG00000175581	MRPL48	mitochondrial ribosomal protein L48 [Source:HGNC Symbol;Acc:HGNC:16653]	-1.53751	5.57718	3.61311e-15	1.25971e-13	Down-regulated
ENSG00000115129	TP53I3	tumor protein p53 inducible protein 3 [Source:HGNC Symbol;Acc:HGNC:19373]	2.39668	5.49609	3.65186e-15	1.27076e-13	Up-regulated
ENSG00000185561	TLCD2	TLC domain containing 2 [Source:HGNC Symbol;Acc:HGNC:33522]	1.53	6.83607	3.66692e-15	1.27355e-13	Up-regulated
ENSG00000248527	MTATP6P1	MT-ATP6 pseudogene 1 [Source:HGNC Symbol;Acc:HGNC:44575]	-2.5067	10.0795	3.68047e-15	1.2758e-13	Down-regulated
ENSG00000109667	SLC2A9	solute carrier family 2 member 9 [Source:HGNC Symbol;Acc:HGNC:13446]	-2.98723	2.79578	3.70707e-15	1.28256e-13	Down-regulated
ENSG00000214113	LYRM4	LYR motif containing 4 [Source:HGNC Symbol;Acc:HGNC:21365]	-2.08359	3.84002	3.74315e-15	1.29257e-13	Down-regulated
ENSG00000121104	FAM117A	family with sequence similarity 117 member A [Source:HGNC Symbol;Acc:HGNC:24179]	-1.83417	5.29789	3.80333e-15	1.31084e-13	Down-regulated
ENSG00000136819	C9orf78	chromosome 9 open reading frame 78 [Source:HGNC Symbol;Acc:HGNC:24932]	1.32636	7.04689	3.82179e-15	1.3147e-13	Up-regulated
ENSG00000180357	ZNF609	zinc finger protein 609 [Source:HGNC Symbol;Acc:HGNC:29003]	-2.29896	5.30848	3.83413e-15	1.31643e-13	Down-regulated
ENSG00000128245	YWHAH	tyrosine 3-monooxygenase/tryptophan 5-monooxygenase activation protein eta [Source:HGNC Symbol;Acc:HGNC:12853]	1.62782	6.6544	3.90302e-15	1.33754e-13	Up-regulated
ENSG00000090020	SLC9A1	solute carrier family 9 member A1 [Source:HGNC Symbol;Acc:HGNC:11071]	1.77493	5.50025	4.02387e-15	1.37442e-13	Up-regulated
ENSG00000122378	PRXL2A	peroxiredoxin like 2A [Source:HGNC Symbol;Acc:HGNC:28651]	-1.25563	8.25921	4.02585e-15	1.37442e-13	Down-regulated
ENSG00000164949	GEM	GTP binding protein overexpressed in skeletal muscle [Source:HGNC Symbol;Acc:HGNC:4234]	2.94867	4.5072	4.03489e-15	1.37491e-13	Up-regulated
ENSG00000103061	SLC7A6OS	solute carrier family 7 member 6 opposite strand [Source:HGNC Symbol;Acc:HGNC:25807]	1.97717	6.62844	4.245e-15	1.44378e-13	Up-regulated
ENSG00000074054	CLASP1	cytoplasmic linker associated protein 1 [Source:HGNC Symbol;Acc:HGNC:17088]	-2.30785	5.6047	4.27181e-15	1.45017e-13	Down-regulated
ENSG00000142627	EPHA2	EPH receptor A2 [Source:HGNC Symbol;Acc:HGNC:3386]	2.1326	4.76273	4.32491e-15	1.46544e-13	Up-regulated
ENSG00000163938	GNL3	G protein nucleolar 3 [Source:HGNC Symbol;Acc:HGNC:29931]	1.43172	6.75967	4.33806e-15	1.46714e-13	Up-regulated
ENSG00000152061	RABGAP1L	RAB GTPase activating protein 1 like [Source:HGNC Symbol;Acc:HGNC:24663]	-2.0634	4.60463	4.35098e-15	1.46876e-13	Down-regulated
ENSG00000198964	SGMS1	sphingomyelin synthase 1 [Source:HGNC Symbol;Acc:HGNC:29799]	-2.62084	5.59901	4.40349e-15	1.48371e-13	Down-regulated
ENSG00000069535	MAOB	monoamine oxidase B [Source:HGNC Symbol;Acc:HGNC:6834]	-2.87438	7.20066	4.46994e-15	1.5033e-13	Down-regulated
ENSG00000198899	MT-ATP6	mitochondrially encoded ATP synthase membrane subunit 6 [Source:HGNC Symbol;Acc:HGNC:7414]	-2.51735	11.8339	4.49352e-15	1.5058e-13	Down-regulated
ENSG00000112599	GUCA1B	guanylate cyclase activator 1B [Source:HGNC Symbol;Acc:HGNC:4679]	3.53864	3.11956	4.49406e-15	1.5058e-13	Up-regulated
ENSG00000196611	MMP1	matrix metallopeptidase 1 [Source:HGNC Symbol;Acc:HGNC:7155]	2.79225	6.73364	4.50559e-15	1.50687e-13	Up-regulated
ENSG00000160216	AGPAT3	1-acylglycerol-3-phosphate O-acyltransferase 3 [Source:HGNC Symbol;Acc:HGNC:326]	-2.30396	6.7202	4.55018e-15	1.51794e-13	Down-regulated
ENSG00000093217	XYLB	xylulokinase [Source:HGNC Symbol;Acc:HGNC:12839]	-2.21245	5.6777	4.5555e-15	1.51794e-13	Down-regulated
ENSG00000081913	PHLPP1	PH domain and leucine rich repeat protein phosphatase 1 [Source:HGNC Symbol;Acc:HGNC:20610]	-2.1015	4.28525	4.57505e-15	1.52165e-13	Down-regulated
ENSG00000101608	MYL12A	myosin light chain 12A [Source:HGNC Symbol;Acc:HGNC:16701]	1.27093	8.90553	4.62635e-15	1.53574e-13	Up-regulated
ENSG00000116985	BMP8B	bone morphogenetic protein 8b [Source:HGNC Symbol;Acc:HGNC:1075]	-2.50435	4.88283	4.63444e-15	1.53574e-13	Down-regulated
ENSG00000133316	WDR74	WD repeat domain 74 [Source:HGNC Symbol;Acc:HGNC:25529]	3.16565	7.01124	4.79015e-15	1.58443e-13	Up-regulated
ENSG00000142197	DOP1B	DOP1 leucine zipper like protein B [Source:HGNC Symbol;Acc:HGNC:1291]	-2.03081	5.5887	4.85146e-15	1.60178e-13	Down-regulated
ENSG00000110906	KCTD10	potassium channel tetramerization domain containing 10 [Source:HGNC Symbol;Acc:HGNC:23236]	1.32007	6.42988	4.90301e-15	1.61585e-13	Up-regulated
ENSG00000262001	DLGAP1-AS2	DLGAP1 antisense RNA 2 [Source:HGNC Symbol;Acc:HGNC:28146]	2.55094	4.3604	4.94128e-15	1.62549e-13	Up-regulated
ENSG00000198130	HIBCH	3-hydroxyisobutyryl-CoA hydrolase [Source:HGNC Symbol;Acc:HGNC:4908]	-1.90986	5.4594	4.98388e-15	1.63652e-13	Down-regulated
ENSG00000108576	SLC6A4	solute carrier family 6 member 4 [Source:HGNC Symbol;Acc:HGNC:11050]	-1.62729	7.02344	5.02682e-15	1.64763e-13	Down-regulated
ENSG00000184368	MAP7D2	MAP7 domain containing 2 [Source:HGNC Symbol;Acc:HGNC:25899]	-2.30547	4.95586	5.18133e-15	1.6952e-13	Down-regulated
ENSG00000197273	GUCA2A	guanylate cyclase activator 2A [Source:HGNC Symbol;Acc:HGNC:4682]	2.71834	5.74949	5.19307e-15	1.69597e-13	Up-regulated
ENSG00000204740	MALRD1	MAM and LDL receptor class A domain containing 1 [Source:HGNC Symbol;Acc:HGNC:24331]	-3.43061	5.9591	5.23436e-15	1.70277e-13	Down-regulated
ENSG00000084710	EFR3B	EFR3 homolog B [Source:HGNC Symbol;Acc:HGNC:29155]	-2.93316	3.29918	5.24111e-15	1.70277e-13	Down-regulated
ENSG00000137642	SORL1	sortilin related receptor 1 [Source:HGNC Symbol;Acc:HGNC:11185]	-2.68894	10.2999	5.2422e-15	1.70277e-13	Down-regulated
ENSG00000137462	TLR2	toll like receptor 2 [Source:HGNC Symbol;Acc:HGNC:11848]	-2.49709	4.47832	5.27859e-15	1.71152e-13	Down-regulated
ENSG00000204262	COL5A2	collagen type V alpha 2 chain [Source:HGNC Symbol;Acc:HGNC:2210]	-2.2003	7.00271	5.33266e-15	1.72595e-13	Down-regulated
ENSG00000120694	HSPH1	heat shock protein family H (Hsp110) member 1 [Source:HGNC Symbol;Acc:HGNC:16969]	1.78524	7.01778	5.36872e-15	1.73451e-13	Up-regulated
ENSG00000090382	LYZ	lysozyme [Source:HGNC Symbol;Acc:HGNC:6740]	2.13937	5.03399	5.41876e-15	1.74576e-13	Up-regulated
ENSG00000273759	0	novel transcript	4.40374	2.79873	5.42289e-15	1.74576e-13	Up-regulated
ENSG00000123353	ORMDL2	ORMDL sphingolipid biosynthesis regulator 2 [Source:HGNC Symbol;Acc:HGNC:16037]	1.81333	5.61073	5.451e-15	1.75169e-13	Up-regulated
ENSG00000196639	HRH1	histamine receptor H1 [Source:HGNC Symbol;Acc:HGNC:5182]	2.68593	3.73471	5.49613e-15	1.76306e-13	Up-regulated
ENSG00000103043	VAC14	VAC14 component of PIKFYVE complex [Source:HGNC Symbol;Acc:HGNC:25507]	-2.52695	5.19846	5.62329e-15	1.80065e-13	Down-regulated
ENSG00000114670	NEK11	NIMA related kinase 11 [Source:HGNC Symbol;Acc:HGNC:18593]	-3.52829	2.40641	5.63871e-15	1.80239e-13	Down-regulated
ENSG00000171723	GPHN	gephyrin [Source:HGNC Symbol;Acc:HGNC:15465]	-4.09614	3.06973	5.66159e-15	1.80651e-13	Down-regulated
ENSG00000117360	PRPF3	pre-mRNA processing factor 3 [Source:HGNC Symbol;Acc:HGNC:17348]	2.02289	6.60687	5.76556e-15	1.83644e-13	Up-regulated
ENSG00000173930	SLCO4C1	solute carrier organic anion transporter family member 4C1 [Source:HGNC Symbol;Acc:HGNC:23612]	-3.79739	3.45641	5.82513e-15	1.85215e-13	Down-regulated
ENSG00000151552	QDPR	quinoid dihydropteridine reductase [Source:HGNC Symbol;Acc:HGNC:9752]	-1.67906	5.11194	5.89719e-15	1.87176e-13	Down-regulated
ENSG00000148229	POLE3	DNA polymerase epsilon 3, accessory subunit [Source:HGNC Symbol;Acc:HGNC:13546]	1.66708	6.02216	5.97557e-15	1.89331e-13	Up-regulated
ENSG00000081760	AACS	acetoacetyl-CoA synthetase [Source:HGNC Symbol;Acc:HGNC:21298]	-2.01215	5.15119	6.05413e-15	1.91484e-13	Down-regulated
ENSG00000148737	TCF7L2	transcription factor 7 like 2 [Source:HGNC Symbol;Acc:HGNC:11641]	-1.89057	6.44144	6.0717e-15	1.91704e-13	Down-regulated
ENSG00000125648	SLC25A23	solute carrier family 25 member 23 [Source:HGNC Symbol;Acc:HGNC:19375]	-1.65594	6.64809	6.40298e-15	2.01811e-13	Down-regulated
ENSG00000129347	KRI1	KRI1 homolog [Source:HGNC Symbol;Acc:HGNC:25769]	1.85548	5.34471	6.48492e-15	2.04038e-13	Up-regulated
ENSG00000142949	PTPRF	protein tyrosine phosphatase receptor type F [Source:HGNC Symbol;Acc:HGNC:9670]	-1.62981	7.55594	6.50543e-15	2.04327e-13	Down-regulated
ENSG00000124120	TTPAL	alpha tocopherol transfer protein like [Source:HGNC Symbol;Acc:HGNC:16114]	1.86331	6.42364	6.53034e-15	2.04753e-13	Up-regulated
ENSG00000124201	ZNFX1	zinc finger NFX1-type containing 1 [Source:HGNC Symbol;Acc:HGNC:29271]	1.62041	7.15421	6.62203e-15	2.07268e-13	Up-regulated
ENSG00000027001	MIPEP	mitochondrial intermediate peptidase [Source:HGNC Symbol;Acc:HGNC:7104]	-2.26544	4.46104	6.71867e-15	2.0993e-13	Down-regulated
ENSG00000196876	SCN8A	sodium voltage-gated channel alpha subunit 8 [Source:HGNC Symbol;Acc:HGNC:10596]	-3.2633	3.7854	6.76597e-15	2.11042e-13	Down-regulated
ENSG00000105821	DNAJC2	DnaJ heat shock protein family (Hsp40) member C2 [Source:HGNC Symbol;Acc:HGNC:13192]	1.63467	6.89903	6.84348e-15	2.13092e-13	Up-regulated
ENSG00000140284	SLC27A2	solute carrier family 27 member 2 [Source:HGNC Symbol;Acc:HGNC:10996]	-2.34707	6.66606	6.88259e-15	2.13941e-13	Down-regulated
ENSG00000107882	SUFU	SUFU negative regulator of hedgehog signaling [Source:HGNC Symbol;Acc:HGNC:16466]	-2.1882	3.8905	7.00179e-15	2.17176e-13	Down-regulated
ENSG00000144560	VGLL4	vestigial like family member 4 [Source:HGNC Symbol;Acc:HGNC:28966]	-1.63587	5.75139	7.01071e-15	2.17176e-13	Down-regulated
ENSG00000117475	BLZF1	basic leucine zipper nuclear factor 1 [Source:HGNC Symbol;Acc:HGNC:1065]	1.80079	4.86813	7.10399e-15	2.19624e-13	Up-regulated
ENSG00000073711	PPP2R3A	protein phosphatase 2 regulatory subunit B''alpha [Source:HGNC Symbol;Acc:HGNC:9307]	-3.12765	5.14821	7.11407e-15	2.19624e-13	Down-regulated
ENSG00000162849	KIF26B	kinesin family member 26B [Source:HGNC Symbol;Acc:HGNC:25484]	-3.17345	2.84168	7.12933e-15	2.1972e-13	Down-regulated
ENSG00000147535	PLPP5	phospholipid phosphatase 5 [Source:HGNC Symbol;Acc:HGNC:25026]	1.93199	5.88277	7.34042e-15	2.25585e-13	Up-regulated
ENSG00000242147	LASTR	lncRNA associated with SART3 regulation of splicing [Source:HGNC Symbol;Acc:HGNC:54143]	-2.35416	3.42393	7.34464e-15	2.25585e-13	Down-regulated
ENSG00000173715	C11orf80	chromosome 11 open reading frame 80 [Source:HGNC Symbol;Acc:HGNC:26197]	-1.53544	6.43348	7.37042e-15	2.25993e-13	Down-regulated
ENSG00000065618	COL17A1	collagen type XVII alpha 1 chain [Source:HGNC Symbol;Acc:HGNC:2194]	-1.97162	5.72712	7.46939e-15	2.28639e-13	Down-regulated
ENSG00000285933	0	novel transcript	-2.30561	3.89875	7.6129e-15	2.32638e-13	Down-regulated
ENSG00000175772	LINC01106	long intergenic non-protein coding RNA 1106 [Source:HGNC Symbol;Acc:HGNC:26769]	-2.58783	3.69495	7.67593e-15	2.34168e-13	Down-regulated
ENSG00000125901	MRPS26	mitochondrial ribosomal protein S26 [Source:HGNC Symbol;Acc:HGNC:14045]	-2.38467	6.62604	7.75459e-15	2.36168e-13	Down-regulated
ENSG00000186716	BCR	BCR activator of RhoGEF and GTPase [Source:HGNC Symbol;Acc:HGNC:1014]	-2.49449	4.71878	7.85598e-15	2.38853e-13	Down-regulated
ENSG00000159445	THEM4	thioesterase superfamily member 4 [Source:HGNC Symbol;Acc:HGNC:17947]	1.84365	4.23991	7.87403e-15	2.39e-13	Up-regulated
ENSG00000151612	ZNF827	zinc finger protein 827 [Source:HGNC Symbol;Acc:HGNC:27193]	-2.48041	4.71879	8.00466e-15	2.42557e-13	Down-regulated
ENSG00000196998	WDR45	WD repeat domain 45 [Source:HGNC Symbol;Acc:HGNC:28912]	2.01027	4.63211	8.12161e-15	2.45689e-13	Up-regulated
ENSG00000013275	PSMC4	proteasome 26S subunit, ATPase 4 [Source:HGNC Symbol;Acc:HGNC:9551]	1.72705	7.31373	8.15939e-15	2.46419e-13	Up-regulated
ENSG00000032389	EIPR1	EARP complex and GARP complex interacting protein 1 [Source:HGNC Symbol;Acc:HGNC:12383]	-3.34707	2.84241	8.25421e-15	2.48867e-13	Down-regulated
ENSG00000078237	TIGAR	TP53 induced glycolysis regulatory phosphatase [Source:HGNC Symbol;Acc:HGNC:1185]	2.58144	3.27946	8.53962e-15	2.56375e-13	Up-regulated
ENSG00000102053	ZC3H12B	zinc finger CCCH-type containing 12B [Source:HGNC Symbol;Acc:HGNC:17407]	-6.00972	3.01829	8.54412e-15	2.56375e-13	Down-regulated
ENSG00000235437	LINC01278	long intergenic non-protein coding RNA 1278 [Source:HGNC Symbol;Acc:HGNC:28090]	-2.09727	5.12809	8.54583e-15	2.56375e-13	Down-regulated
ENSG00000176974	SHMT1	serine hydroxymethyltransferase 1 [Source:HGNC Symbol;Acc:HGNC:10850]	-2.00006	5.34306	8.67698e-15	2.59878e-13	Down-regulated
ENSG00000132842	AP3B1	adaptor related protein complex 3 subunit beta 1 [Source:HGNC Symbol;Acc:HGNC:566]	-1.97161	5.78172	8.69734e-15	2.60056e-13	Down-regulated
ENSG00000103056	SMPD3	sphingomyelin phosphodiesterase 3 [Source:HGNC Symbol;Acc:HGNC:14240]	-2.14756	6.09564	8.71721e-15	2.60219e-13	Down-regulated
ENSG00000079974	RABL2B	RAB, member of RAS oncogene family like 2B [Source:HGNC Symbol;Acc:HGNC:9800]	2.38385	3.9314	8.77389e-15	2.61479e-13	Up-regulated
ENSG00000073060	SCARB1	scavenger receptor class B member 1 [Source:HGNC Symbol;Acc:HGNC:1664]	-2.23505	7.28663	8.80539e-15	2.61844e-13	Down-regulated
ENSG00000157600	TMEM164	transmembrane protein 164 [Source:HGNC Symbol;Acc:HGNC:26217]	-2.40587	6.59228	8.81513e-15	2.61844e-13	Down-regulated
ENSG00000102606	ARHGEF7	Rho guanine nucleotide exchange factor 7 [Source:HGNC Symbol;Acc:HGNC:15607]	-1.63286	6.15381	9.08404e-15	2.69389e-13	Down-regulated
ENSG00000196814	MVB12B	multivesicular body subunit 12B [Source:HGNC Symbol;Acc:HGNC:23368]	-2.72498	4.34125	9.31215e-15	2.75701e-13	Down-regulated
ENSG00000143858	SYT2	synaptotagmin 2 [Source:HGNC Symbol;Acc:HGNC:11510]	-4.35788	1.63823	9.37066e-15	2.76979e-13	Down-regulated
ENSG00000105991	HOXA1	homeobox A1 [Source:HGNC Symbol;Acc:HGNC:5099]	2.38337	4.10742	9.48368e-15	2.79856e-13	Up-regulated
ENSG00000197724	PHF2	PHD finger protein 2 [Source:HGNC Symbol;Acc:HGNC:8920]	-2.16204	3.4137	9.49898e-15	2.79856e-13	Down-regulated
ENSG00000164182	NDUFAF2	NADH:ubiquinone oxidoreductase complex assembly factor 2 [Source:HGNC Symbol;Acc:HGNC:28086]	-2.44684	3.80142	9.54508e-15	2.80358e-13	Down-regulated
ENSG00000148082	SHC3	SHC adaptor protein 3 [Source:HGNC Symbol;Acc:HGNC:18181]	-4.476	1.35154	9.54707e-15	2.80358e-13	Down-regulated
ENSG00000068323	TFE3	transcription factor binding to IGHM enhancer 3 [Source:HGNC Symbol;Acc:HGNC:11752]	1.86393	5.99835	9.79034e-15	2.87035e-13	Up-regulated
ENSG00000269190	FBXO17	F-box protein 17 [Source:HGNC Symbol;Acc:HGNC:18754]	-1.78324	7.32017	9.83523e-15	2.87884e-13	Down-regulated
ENSG00000060656	PTPRU	protein tyrosine phosphatase receptor type U [Source:HGNC Symbol;Acc:HGNC:9683]	-2.10418	5.22644	9.98378e-15	2.91731e-13	Down-regulated
ENSG00000135423	GLS2	glutaminase 2 [Source:HGNC Symbol;Acc:HGNC:29570]	-2.15303	4.56871	9.99898e-15	2.91731e-13	Down-regulated
ENSG00000113361	CDH6	cadherin 6 [Source:HGNC Symbol;Acc:HGNC:1765]	-6.50137	2.07941	1.00321e-14	2.92226e-13	Down-regulated
ENSG00000198001	IRAK4	interleukin 1 receptor associated kinase 4 [Source:HGNC Symbol;Acc:HGNC:17967]	1.53482	5.09196	1.01043e-14	2.93855e-13	Up-regulated
ENSG00000170873	MTSS1	MTSS I-BAR domain containing 1 [Source:HGNC Symbol;Acc:HGNC:20443]	-2.92567	3.84904	1.0136e-14	2.94304e-13	Down-regulated
ENSG00000106636	YKT6	YKT6 v-SNARE homolog [Source:HGNC Symbol;Acc:HGNC:16959]	1.28121	7.57441	1.01549e-14	2.94377e-13	Up-regulated
ENSG00000141378	PTRH2	peptidyl-tRNA hydrolase 2 [Source:HGNC Symbol;Acc:HGNC:24265]	1.50552	5.64844	1.02861e-14	2.97702e-13	Up-regulated
ENSG00000149218	ENDOD1	endonuclease domain containing 1 [Source:HGNC Symbol;Acc:HGNC:29129]	-1.97947	7.40804	1.03411e-14	2.98377e-13	Down-regulated
ENSG00000235663	SAPCD1-AS1	SAPCD1 antisense RNA 1 [Source:HGNC Symbol;Acc:HGNC:39824]	2.69785	2.73481	1.03424e-14	2.98377e-13	Up-regulated
ENSG00000204592	HLA-E	major histocompatibility complex, class I, E [Source:HGNC Symbol;Acc:HGNC:4962]	1.5363	7.55121	1.04057e-14	2.99723e-13	Up-regulated
ENSG00000180008	SOCS4	suppressor of cytokine signaling 4 [Source:HGNC Symbol;Acc:HGNC:19392]	2.06606	5.4314	1.04404e-14	3.00244e-13	Up-regulated
ENSG00000071462	BUD23	BUD23 rRNA methyltransferase and ribosome maturation factor [Source:HGNC Symbol;Acc:HGNC:16405]	1.48408	6.97153	1.04992e-14	3.01205e-13	Up-regulated
ENSG00000154978	VOPP1	VOPP1 WW domain binding protein [Source:HGNC Symbol;Acc:HGNC:34518]	-2.28977	2.97519	1.05072e-14	3.01205e-13	Down-regulated
ENSG00000134243	SORT1	sortilin 1 [Source:HGNC Symbol;Acc:HGNC:11186]	-1.92537	6.74134	1.06455e-14	3.0447e-13	Down-regulated
ENSG00000100647	SUSD6	sushi domain containing 6 [Source:HGNC Symbol;Acc:HGNC:19956]	-1.75468	6.52072	1.06547e-14	3.0447e-13	Down-regulated
ENSG00000070759	TESK2	testis associated actin remodelling kinase 2 [Source:HGNC Symbol;Acc:HGNC:11732]	-2.01403	4.1862	1.08755e-14	3.10288e-13	Down-regulated
ENSG00000126858	RHOT1	ras homolog family member T1 [Source:HGNC Symbol;Acc:HGNC:21168]	-2.30796	5.77181	1.09109e-14	3.10805e-13	Down-regulated
ENSG00000132394	EEFSEC	eukaryotic elongation factor, selenocysteine-tRNA specific [Source:HGNC Symbol;Acc:HGNC:24614]	-4.19206	3.39065	1.09385e-14	3.11103e-13	Down-regulated
ENSG00000124299	PEPD	peptidase D [Source:HGNC Symbol;Acc:HGNC:8840]	-4.36163	6.64384	1.10007e-14	3.12378e-13	Down-regulated
ENSG00000175376	EIF1AD	eukaryotic translation initiation factor 1A domain containing [Source:HGNC Symbol;Acc:HGNC:28147]	1.37224	6.31695	1.10686e-14	3.13812e-13	Up-regulated
ENSG00000114544	SLC41A3	solute carrier family 41 member 3 [Source:HGNC Symbol;Acc:HGNC:31046]	-1.60545	4.88442	1.11637e-14	3.16014e-13	Down-regulated
ENSG00000006194	ZNF263	zinc finger protein 263 [Source:HGNC Symbol;Acc:HGNC:13056]	1.59229	6.56476	1.13566e-14	3.20969e-13	Up-regulated
ENSG00000238755	LINC02006	long intergenic non-protein coding RNA 2006 [Source:HGNC Symbol;Acc:HGNC:52842]	-5.07545	1.64493	1.15072e-14	3.24718e-13	Down-regulated
ENSG00000075391	RASAL2	RAS protein activator like 2 [Source:HGNC Symbol;Acc:HGNC:9874]	-3.03393	4.35142	1.15298e-14	3.2485e-13	Down-regulated
ENSG00000166444	DENND2B	DENN domain containing 2B [Source:HGNC Symbol;Acc:HGNC:11350]	-2.8182	3.92882	1.17557e-14	3.30697e-13	Down-regulated
ENSG00000066468	FGFR2	fibroblast growth factor receptor 2 [Source:HGNC Symbol;Acc:HGNC:3689]	-2.37022	5.42852	1.17975e-14	3.31357e-13	Down-regulated
ENSG00000196482	ESRRG	estrogen related receptor gamma [Source:HGNC Symbol;Acc:HGNC:3474]	-7.71782	1.0975	1.18337e-14	3.31626e-13	Down-regulated
ENSG00000124228	DDX27	DEAD-box helicase 27 [Source:HGNC Symbol;Acc:HGNC:15837]	1.25361	8.85846	1.18448e-14	3.31626e-13	Up-regulated
ENSG00000108960	MMD	monocyte to macrophage differentiation associated [Source:HGNC Symbol;Acc:HGNC:7153]	1.67119	5.36994	1.18621e-14	3.31626e-13	Up-regulated
ENSG00000255545	B3GAT1-DT	B3GAT1 divergent transcript [Source:HGNC Symbol;Acc:HGNC:27449]	-2.66323	3.87076	1.19002e-14	3.32175e-13	Down-regulated
ENSG00000120162	MOB3B	MOB kinase activator 3B [Source:HGNC Symbol;Acc:HGNC:23825]	-2.95836	3.32065	1.19287e-14	3.32457e-13	Down-regulated
ENSG00000111731	C2CD5	C2 calcium dependent domain containing 5 [Source:HGNC Symbol;Acc:HGNC:29062]	-2.25221	6.65747	1.20268e-14	3.34674e-13	Down-regulated
ENSG00000121210	TMEM131L	transmembrane 131 like [Source:HGNC Symbol;Acc:HGNC:29146]	-2.8705	2.94867	1.20566e-14	3.34987e-13	Down-regulated
ENSG00000102910	LONP2	lon peptidase 2, peroxisomal [Source:HGNC Symbol;Acc:HGNC:20598]	-1.77104	6.59435	1.23658e-14	3.43051e-13	Down-regulated
ENSG00000166002	SMCO4	single-pass membrane protein with coiled-coil domains 4 [Source:HGNC Symbol;Acc:HGNC:24810]	-3.33332	2.82656	1.24669e-14	3.44693e-13	Down-regulated
ENSG00000165475	CRYL1	crystallin lambda 1 [Source:HGNC Symbol;Acc:HGNC:18246]	-2.50774	6.68926	1.24671e-14	3.44693e-13	Down-regulated
ENSG00000174227	PIGG	phosphatidylinositol glycan anchor biosynthesis class G [Source:HGNC Symbol;Acc:HGNC:25985]	1.48298	5.42785	1.24822e-14	3.44693e-13	Up-regulated
ENSG00000109079	TNFAIP1	TNF alpha induced protein 1 [Source:HGNC Symbol;Acc:HGNC:11894]	1.15589	8.25157	1.25865e-14	3.47041e-13	Up-regulated
ENSG00000163697	APBB2	amyloid beta precursor protein binding family B member 2 [Source:HGNC Symbol;Acc:HGNC:582]	-2.07732	4.459	1.26435e-14	3.48082e-13	Down-regulated
ENSG00000196660	SLC30A10	solute carrier family 30 member 10 [Source:HGNC Symbol;Acc:HGNC:25355]	-2.31961	4.31782	1.27082e-14	3.49329e-13	Down-regulated
ENSG00000056998	GYG2	glycogenin 2 [Source:HGNC Symbol;Acc:HGNC:4700]	-2.01637	5.39934	1.27899e-14	3.51041e-13	Down-regulated
ENSG00000123407	HOXC12	homeobox C12 [Source:HGNC Symbol;Acc:HGNC:5124]	2.12547	4.85246	1.28244e-14	3.51456e-13	Up-regulated
ENSG00000185432	METTL7A	methyltransferase like 7A [Source:HGNC Symbol;Acc:HGNC:24550]	-3.23286	4.83481	1.29889e-14	3.55423e-13	Down-regulated
ENSG00000114107	CEP70	centrosomal protein 70 [Source:HGNC Symbol;Acc:HGNC:29972]	-2.40407	3.91322	1.33415e-14	3.64521e-13	Down-regulated
ENSG00000093000	NUP50	nucleoporin 50 [Source:HGNC Symbol;Acc:HGNC:8065]	1.51506	6.71929	1.34376e-14	3.66592e-13	Up-regulated
ENSG00000117419	ERI3	ERI1 exoribonuclease family member 3 [Source:HGNC Symbol;Acc:HGNC:17276]	-2.22006	3.58661	1.34854e-14	3.67063e-13	Down-regulated
ENSG00000107099	DOCK8	dedicator of cytokinesis 8 [Source:HGNC Symbol;Acc:HGNC:19191]	-2.70219	3.05049	1.34956e-14	3.67063e-13	Down-regulated
ENSG00000170310	STX8	syntaxin 8 [Source:HGNC Symbol;Acc:HGNC:11443]	-3.90193	3.18869	1.35529e-14	3.68069e-13	Down-regulated
ENSG00000078804	TP53INP2	tumor protein p53 inducible nuclear protein 2 [Source:HGNC Symbol;Acc:HGNC:16104]	1.65753	7.26209	1.38405e-14	3.75314e-13	Up-regulated
ENSG00000114166	KAT2B	lysine acetyltransferase 2B [Source:HGNC Symbol;Acc:HGNC:8638]	-2.83008	3.16888	1.38655e-14	3.75428e-13	Down-regulated
ENSG00000136643	RPS6KC1	ribosomal protein S6 kinase C1 [Source:HGNC Symbol;Acc:HGNC:10439]	-2.25757	4.54656	1.38873e-14	3.75455e-13	Down-regulated
ENSG00000158813	EDA	ectodysplasin A [Source:HGNC Symbol;Acc:HGNC:3157]	-4.4483	2.48829	1.40414e-14	3.79054e-13	Down-regulated
ENSG00000187242	KRT12	keratin 12 [Source:HGNC Symbol;Acc:HGNC:6414]	7.11796	2.33264	1.4099e-14	3.80042e-13	Up-regulated
ENSG00000154122	ANKH	ANKH inorganic pyrophosphate transport regulator [Source:HGNC Symbol;Acc:HGNC:15492]	-2.39621	4.46519	1.43383e-14	3.85916e-13	Down-regulated
ENSG00000120519	SLC10A7	solute carrier family 10 member 7 [Source:HGNC Symbol;Acc:HGNC:23088]	-3.49256	3.15128	1.44241e-14	3.87647e-13	Down-regulated
ENSG00000135525	MAP7	microtubule associated protein 7 [Source:HGNC Symbol;Acc:HGNC:6869]	-1.74946	5.76457	1.46341e-14	3.92708e-13	Down-regulated
ENSG00000174373	RALGAPA1	Ral GTPase activating protein catalytic subunit alpha 1 [Source:HGNC Symbol;Acc:HGNC:17770]	-1.94423	3.92658	1.53358e-14	4.1038e-13	Down-regulated
ENSG00000058729	RIOK2	RIO kinase 2 [Source:HGNC Symbol;Acc:HGNC:18999]	1.43364	6.2309	1.53381e-14	4.1038e-13	Up-regulated
ENSG00000197122	SRC	SRC proto-oncogene, non-receptor tyrosine kinase [Source:HGNC Symbol;Acc:HGNC:11283]	-1.7452	5.96932	1.55436e-14	4.15262e-13	Down-regulated
ENSG00000131043	AAR2	AAR2 splicing factor [Source:HGNC Symbol;Acc:HGNC:15886]	1.48312	6.7998	1.58825e-14	4.23689e-13	Up-regulated
ENSG00000084453	SLCO1A2	solute carrier organic anion transporter family member 1A2 [Source:HGNC Symbol;Acc:HGNC:10956]	-3.72782	3.04772	1.60241e-14	4.26838e-13	Down-regulated
ENSG00000129084	PSMA1	proteasome 20S subunit alpha 1 [Source:HGNC Symbol;Acc:HGNC:9530]	2.61222	5.65225	1.62232e-14	4.30871e-13	Up-regulated
ENSG00000049323	LTBP1	latent transforming growth factor beta binding protein 1 [Source:HGNC Symbol;Acc:HGNC:6714]	-2.80784	3.39384	1.62233e-14	4.30871e-13	Down-regulated
ENSG00000179912	R3HDM2	R3H domain containing 2 [Source:HGNC Symbol;Acc:HGNC:29167]	-2.65241	4.4127	1.62554e-14	4.31091e-13	Down-regulated
ENSG00000107959	PITRM1	pitrilysin metallopeptidase 1 [Source:HGNC Symbol;Acc:HGNC:17663]	1.22434	6.87956	1.66378e-14	4.40583e-13	Up-regulated
ENSG00000204217	BMPR2	bone morphogenetic protein receptor type 2 [Source:HGNC Symbol;Acc:HGNC:1078]	-2.42101	5.63183	1.6715e-14	4.41981e-13	Down-regulated
ENSG00000003096	KLHL13	kelch like family member 13 [Source:HGNC Symbol;Acc:HGNC:22931]	-4.27571	5.08144	1.69069e-14	4.46403e-13	Down-regulated
ENSG00000089199	CHGB	chromogranin B [Source:HGNC Symbol;Acc:HGNC:1930]	3.80029	2.08044	1.70141e-14	4.48576e-13	Up-regulated
ENSG00000176124	DLEU1	deleted in lymphocytic leukemia 1 [Source:HGNC Symbol;Acc:HGNC:13747]	-2.19763	3.8445	1.72119e-14	4.53128e-13	Down-regulated
ENSG00000134508	CABLES1	Cdk5 and Abl enzyme substrate 1 [Source:HGNC Symbol;Acc:HGNC:25097]	-2.2251	4.55329	1.74224e-14	4.57402e-13	Down-regulated
ENSG00000187676	B3GLCT	beta 3-glucosyltransferase [Source:HGNC Symbol;Acc:HGNC:20207]	-2.53485	3.15886	1.74249e-14	4.57402e-13	Down-regulated
ENSG00000250903	GMDS-DT	GMDS divergent transcript [Source:HGNC Symbol;Acc:HGNC:48993]	-2.43147	3.25209	1.75511e-14	4.60044e-13	Down-regulated
ENSG00000006704	GTF2IRD1	GTF2I repeat domain containing 1 [Source:HGNC Symbol;Acc:HGNC:4661]	-2.50007	4.99642	1.75764e-14	4.60044e-13	Down-regulated
ENSG00000101493	ZNF516	zinc finger protein 516 [Source:HGNC Symbol;Acc:HGNC:28990]	-2.35858	3.09696	1.77526e-14	4.63983e-13	Down-regulated
ENSG00000198517	MAFK	MAF bZIP transcription factor K [Source:HGNC Symbol;Acc:HGNC:6782]	2.60064	5.20901	1.78837e-14	4.66734e-13	Up-regulated
ENSG00000109084	TMEM97	transmembrane protein 97 [Source:HGNC Symbol;Acc:HGNC:28106]	-1.54526	7.42823	1.79189e-14	4.66978e-13	Down-regulated
ENSG00000118418	HMGN3	high mobility group nucleosomal binding domain 3 [Source:HGNC Symbol;Acc:HGNC:12312]	-1.63812	6.47045	1.82605e-14	4.7498e-13	Down-regulated
ENSG00000052126	PLEKHA5	pleckstrin homology domain containing A5 [Source:HGNC Symbol;Acc:HGNC:30036]	-2.04321	5.6728	1.82786e-14	4.7498e-13	Down-regulated
ENSG00000059573	ALDH18A1	aldehyde dehydrogenase 18 family member A1 [Source:HGNC Symbol;Acc:HGNC:9722]	-1.78231	9.43287	1.84273e-14	4.7798e-13	Down-regulated
ENSG00000111319	SCNN1A	sodium channel epithelial 1 subunit alpha [Source:HGNC Symbol;Acc:HGNC:10599]	1.85229	3.40039	1.84469e-14	4.7798e-13	Up-regulated
ENSG00000104299	INTS9	integrator complex subunit 9 [Source:HGNC Symbol;Acc:HGNC:25592]	-2.221	3.84774	1.86234e-14	4.8186e-13	Down-regulated
ENSG00000164039	BDH2	3-hydroxybutyrate dehydrogenase 2 [Source:HGNC Symbol;Acc:HGNC:32389]	-1.96643	5.5609	1.89336e-14	4.89186e-13	Down-regulated
ENSG00000171843	MLLT3	MLLT3 super elongation complex subunit [Source:HGNC Symbol;Acc:HGNC:7136]	-2.42675	4.99443	1.91092e-14	4.93017e-13	Down-regulated
ENSG00000044446	PHKA2	phosphorylase kinase regulatory subunit alpha 2 [Source:HGNC Symbol;Acc:HGNC:8926]	-1.88489	5.20742	1.92889e-14	4.96826e-13	Down-regulated
ENSG00000167117	ANKRD40CL	ANKRD40 C-terminal like [Source:HGNC Symbol;Acc:HGNC:26080]	-1.98594	6.40989	1.93118e-14	4.96826e-13	Down-regulated
ENSG00000175806	MSRA	methionine sulfoxide reductase A [Source:HGNC Symbol;Acc:HGNC:7377]	-5.25444	2.05024	1.93607e-14	4.97375e-13	Down-regulated
ENSG00000182957	SPATA13	spermatogenesis associated 13 [Source:HGNC Symbol;Acc:HGNC:23222]	-2.54958	3.69186	1.94588e-14	4.99183e-13	Down-regulated
ENSG00000153015	CWC27	CWC27 spliceosome associated cyclophilin [Source:HGNC Symbol;Acc:HGNC:10664]	-2.1018	4.95733	1.95295e-14	5.00288e-13	Down-regulated
ENSG00000149792	MRPL49	mitochondrial ribosomal protein L49 [Source:HGNC Symbol;Acc:HGNC:1176]	1.53462	7.31465	1.95808e-14	5.0089e-13	Up-regulated
ENSG00000260917	0	novel transcript, overlapping to VTI1A	-3.72809	2.23058	1.97379e-14	5.04196e-13	Down-regulated
ENSG00000166685	COG1	component of oligomeric golgi complex 1 [Source:HGNC Symbol;Acc:HGNC:6545]	1.41584	6.5128	1.99735e-14	5.09495e-13	Up-regulated
ENSG00000136478	TEX2	testis expressed 2 [Source:HGNC Symbol;Acc:HGNC:30884]	-2.2532	6.01275	2.01033e-14	5.12082e-13	Down-regulated
ENSG00000273604	EPOP	elongin BC and polycomb repressive complex 2 associated protein [Source:HGNC Symbol;Acc:HGNC:34493]	1.59049	4.28187	2.01497e-14	5.1254e-13	Up-regulated
ENSG00000065548	ZC3H15	zinc finger CCCH-type containing 15 [Source:HGNC Symbol;Acc:HGNC:29528]	1.33889	7.26699	2.04894e-14	5.20447e-13	Up-regulated
ENSG00000159733	ZFYVE28	zinc finger FYVE-type containing 28 [Source:HGNC Symbol;Acc:HGNC:29334]	-4.14313	2.29236	2.08037e-14	5.27689e-13	Down-regulated
ENSG00000067208	EVI5	ecotropic viral integration site 5 [Source:HGNC Symbol;Acc:HGNC:3501]	-2.44211	4.00767	2.08744e-14	5.28739e-13	Down-regulated
ENSG00000132915	PDE6A	phosphodiesterase 6A [Source:HGNC Symbol;Acc:HGNC:8785]	-2.59901	2.69185	2.10942e-14	5.33558e-13	Down-regulated
ENSG00000151150	ANK3	ankyrin 3 [Source:HGNC Symbol;Acc:HGNC:494]	-2.62625	7.22093	2.13619e-14	5.39574e-13	Down-regulated
ENSG00000169902	TPST1	tyrosylprotein sulfotransferase 1 [Source:HGNC Symbol;Acc:HGNC:12020]	-2.30915	3.99743	2.14516e-14	5.41083e-13	Down-regulated
ENSG00000037474	NSUN2	NOP2/Sun RNA methyltransferase 2 [Source:HGNC Symbol;Acc:HGNC:25994]	1.24391	7.25973	2.19715e-14	5.53424e-13	Up-regulated
ENSG00000172748	ZNF596	zinc finger protein 596 [Source:HGNC Symbol;Acc:HGNC:27268]	3.49968	2.25229	2.22242e-14	5.5901e-13	Up-regulated
ENSG00000204406	MBD5	methyl-CpG binding domain protein 5 [Source:HGNC Symbol;Acc:HGNC:20444]	-1.9638	4.38018	2.28968e-14	5.75126e-13	Down-regulated
ENSG00000078124	ACER3	alkaline ceramidase 3 [Source:HGNC Symbol;Acc:HGNC:16066]	-2.07596	5.47838	2.31357e-14	5.80321e-13	Down-regulated
ENSG00000165591	FAAH2	fatty acid amide hydrolase 2 [Source:HGNC Symbol;Acc:HGNC:26440]	-3.00096	2.94504	2.32271e-14	5.81806e-13	Down-regulated
ENSG00000198398	TMEM207	transmembrane protein 207 [Source:HGNC Symbol;Acc:HGNC:33705]	-1.85882	5.12776	2.33516e-14	5.84113e-13	Down-regulated
ENSG00000213903	LTB4R	leukotriene B4 receptor [Source:HGNC Symbol;Acc:HGNC:6713]	3.08158	5.39228	2.345e-14	5.85763e-13	Up-regulated
ENSG00000025039	RRAGD	Ras related GTP binding D [Source:HGNC Symbol;Acc:HGNC:19903]	-2.26833	5.74475	2.35028e-14	5.86271e-13	Down-regulated
ENSG00000111845	PAK1IP1	PAK1 interacting protein 1 [Source:HGNC Symbol;Acc:HGNC:20882]	1.56594	4.51284	2.36233e-14	5.88465e-13	Up-regulated
ENSG00000145431	PDGFC	platelet derived growth factor C [Source:HGNC Symbol;Acc:HGNC:8801]	-2.33771	4.74924	2.3753e-14	5.90881e-13	Down-regulated
ENSG00000125772	GPCPD1	glycerophosphocholine phosphodiesterase 1 [Source:HGNC Symbol;Acc:HGNC:26957]	2.25071	3.54488	2.39745e-14	5.95569e-13	Up-regulated
ENSG00000172572	PDE3A	phosphodiesterase 3A [Source:HGNC Symbol;Acc:HGNC:8778]	-3.7178	4.33126	2.45289e-14	6.08506e-13	Down-regulated
ENSG00000257261	0	novel transcript	-3.09613	2.49477	2.45962e-14	6.09337e-13	Down-regulated
ENSG00000087191	PSMC5	proteasome 26S subunit, ATPase 5 [Source:HGNC Symbol;Acc:HGNC:9552]	1.3949	7.66033	2.55237e-14	6.31343e-13	Up-regulated
ENSG00000120437	ACAT2	acetyl-CoA acetyltransferase 2 [Source:HGNC Symbol;Acc:HGNC:94]	-1.57938	6.98128	2.55543e-14	6.31343e-13	Down-regulated
ENSG00000102181	CD99L2	CD99 molecule like 2 [Source:HGNC Symbol;Acc:HGNC:18237]	-2.60709	3.28258	2.58541e-14	6.37556e-13	Down-regulated
ENSG00000136003	ISCU	iron-sulfur cluster assembly enzyme [Source:HGNC Symbol;Acc:HGNC:29882]	1.17226	6.78874	2.58764e-14	6.37556e-13	Up-regulated
ENSG00000164237	CMBL	carboxymethylenebutenolidase homolog [Source:HGNC Symbol;Acc:HGNC:25090]	-2.38027	4.23471	2.63928e-14	6.49392e-13	Down-regulated
ENSG00000182185	RAD51B	RAD51 paralog B [Source:HGNC Symbol;Acc:HGNC:9822]	-3.60072	2.55534	2.64536e-14	6.50004e-13	Down-regulated
ENSG00000109323	MANBA	mannosidase beta [Source:HGNC Symbol;Acc:HGNC:6831]	-1.57222	6.07033	2.66521e-14	6.53991e-13	Down-regulated
ENSG00000142227	EMP3	epithelial membrane protein 3 [Source:HGNC Symbol;Acc:HGNC:3335]	3.17171	2.07257	2.7289e-14	6.67845e-13	Up-regulated
ENSG00000132792	CTNNBL1	catenin beta like 1 [Source:HGNC Symbol;Acc:HGNC:15879]	-1.68666	7.39669	2.72907e-14	6.67845e-13	Down-regulated
ENSG00000119408	NEK6	NIMA related kinase 6 [Source:HGNC Symbol;Acc:HGNC:7749]	-2.37805	4.55918	2.75169e-14	6.72469e-13	Down-regulated
ENSG00000204588	LINC01123	long intergenic non-protein coding RNA 1123 [Source:HGNC Symbol;Acc:HGNC:49269]	-2.46806	4.12167	2.79472e-14	6.82064e-13	Down-regulated
ENSG00000089195	TRMT6	tRNA methyltransferase 6 non-catalytic subunit [Source:HGNC Symbol;Acc:HGNC:20900]	1.39985	5.91475	2.83269e-14	6.90396e-13	Up-regulated
ENSG00000132952	USPL1	ubiquitin specific peptidase like 1 [Source:HGNC Symbol;Acc:HGNC:20294]	1.9478	6.76066	2.85397e-14	6.94646e-13	Up-regulated
ENSG00000158528	PPP1R9A	protein phosphatase 1 regulatory subunit 9A [Source:HGNC Symbol;Acc:HGNC:14946]	-3.97666	3.77161	2.86129e-14	6.95491e-13	Down-regulated
ENSG00000011347	SYT7	synaptotagmin 7 [Source:HGNC Symbol;Acc:HGNC:11514]	-1.43979	6.38124	2.88115e-14	6.99375e-13	Down-regulated
ENSG00000142583	SLC2A5	solute carrier family 2 member 5 [Source:HGNC Symbol;Acc:HGNC:11010]	-2.28643	8.76232	2.91066e-14	7.0559e-13	Down-regulated
ENSG00000277161	PIGW	phosphatidylinositol glycan anchor biosynthesis class W [Source:HGNC Symbol;Acc:HGNC:23213]	2.06125	4.93154	2.95163e-14	7.14043e-13	Up-regulated
ENSG00000115425	PECR	peroxisomal trans-2-enoyl-CoA reductase [Source:HGNC Symbol;Acc:HGNC:18281]	-1.70583	5.03869	2.95343e-14	7.14043e-13	Down-regulated
ENSG00000170445	HARS1	histidyl-tRNA synthetase 1 [Source:HGNC Symbol;Acc:HGNC:4816]	1.37281	6.40771	2.96483e-14	7.15841e-13	Up-regulated
ENSG00000138185	ENTPD1	ectonucleoside triphosphate diphosphohydrolase 1 [Source:HGNC Symbol;Acc:HGNC:3363]	-3.39872	2.57687	2.9691e-14	7.15913e-13	Down-regulated
ENSG00000020426	MNAT1	MNAT1 component of CDK activating kinase [Source:HGNC Symbol;Acc:HGNC:7181]	-2.36011	3.68109	3.00581e-14	7.23798e-13	Down-regulated
ENSG00000130638	ATXN10	ataxin 10 [Source:HGNC Symbol;Acc:HGNC:10549]	-1.78103	6.01596	3.02955e-14	7.2774e-13	Down-regulated
ENSG00000111879	FAM184A	family with sequence similarity 184 member A [Source:HGNC Symbol;Acc:HGNC:20991]	-2.78352	3.88448	3.03058e-14	7.2774e-13	Down-regulated
ENSG00000048707	VPS13D	vacuolar protein sorting 13 homolog D [Source:HGNC Symbol;Acc:HGNC:23595]	-2.66499	4.83657	3.03621e-14	7.2774e-13	Down-regulated
ENSG00000152078	TLCD4	TLC domain containing 4 [Source:HGNC Symbol;Acc:HGNC:26477]	-2.15903	4.2769	3.03954e-14	7.2774e-13	Down-regulated
ENSG00000084623	EIF3I	eukaryotic translation initiation factor 3 subunit I [Source:HGNC Symbol;Acc:HGNC:3272]	1.31628	7.28054	3.04233e-14	7.2774e-13	Up-regulated
ENSG00000109265	CRACD	capping protein inhibiting regulator of actin dynamics [Source:HGNC Symbol;Acc:HGNC:29219]	-3.49885	2.69118	3.06168e-14	7.314e-13	Down-regulated
ENSG00000197081	IGF2R	insulin like growth factor 2 receptor [Source:HGNC Symbol;Acc:HGNC:5467]	-2.00006	8.18872	3.06917e-14	7.32223e-13	Down-regulated
ENSG00000155368	DBI	diazepam binding inhibitor, acyl-CoA binding protein [Source:HGNC Symbol;Acc:HGNC:2690]	-1.40447	9.1401	3.10785e-14	7.40471e-13	Down-regulated
ENSG00000142751	GPN2	GPN-loop GTPase 2 [Source:HGNC Symbol;Acc:HGNC:25513]	1.92102	5.80681	3.11364e-14	7.40873e-13	Up-regulated
ENSG00000068724	TTC7A	tetratricopeptide repeat domain 7A [Source:HGNC Symbol;Acc:HGNC:19750]	-2.39656	5.69217	3.13104e-14	7.44034e-13	Down-regulated
ENSG00000136875	PRPF4	pre-mRNA processing factor 4 [Source:HGNC Symbol;Acc:HGNC:17349]	1.47741	5.85736	3.14994e-14	7.47541e-13	Up-regulated
ENSG00000072736	NFATC3	nuclear factor of activated T cells 3 [Source:HGNC Symbol;Acc:HGNC:7777]	-1.8872	5.94647	3.18056e-14	7.53437e-13	Down-regulated
ENSG00000152270	PDE3B	phosphodiesterase 3B [Source:HGNC Symbol;Acc:HGNC:8779]	-2.72948	4.3394	3.18312e-14	7.53437e-13	Down-regulated
ENSG00000130338	TULP4	TUB like protein 4 [Source:HGNC Symbol;Acc:HGNC:15530]	-2.01037	6.59657	3.21047e-14	7.58231e-13	Down-regulated
ENSG00000205542	TMSB4X	thymosin beta 4 X-linked [Source:HGNC Symbol;Acc:HGNC:11881]	1.40284	6.47943	3.21178e-14	7.58231e-13	Up-regulated
ENSG00000232533	0	novel transcript	1.92648	3.69822	3.22612e-14	7.60466e-13	Up-regulated
ENSG00000164053	ATRIP	ATR interacting protein [Source:HGNC Symbol;Acc:HGNC:33499]	3.02092	4.08964	3.22966e-14	7.60466e-13	Up-regulated
ENSG00000136231	IGF2BP3	insulin like growth factor 2 mRNA binding protein 3 [Source:HGNC Symbol;Acc:HGNC:28868]	-1.69436	6.41223	3.30067e-14	7.76173e-13	Down-regulated
ENSG00000186666	BCDIN3D	BCDIN3 domain containing RNA methyltransferase [Source:HGNC Symbol;Acc:HGNC:27050]	2.8909	5.08857	3.3216e-14	7.80078e-13	Up-regulated
ENSG00000120725	SIL1	SIL1 nucleotide exchange factor [Source:HGNC Symbol;Acc:HGNC:24624]	-2.18618	3.83124	3.35629e-14	7.87204e-13	Down-regulated
ENSG00000108984	MAP2K6	mitogen-activated protein kinase kinase 6 [Source:HGNC Symbol;Acc:HGNC:6846]	-2.20426	4.52354	3.41086e-14	7.98964e-13	Down-regulated
ENSG00000198938	MT-CO3	mitochondrially encoded cytochrome c oxidase III [Source:HGNC Symbol;Acc:HGNC:7422]	-2.47378	12.4926	3.46921e-14	8.1158e-13	Down-regulated
ENSG00000025293	PHF20	PHD finger protein 20 [Source:HGNC Symbol;Acc:HGNC:16098]	-1.64574	5.75214	3.49541e-14	8.14993e-13	Down-regulated
ENSG00000112992	NNT	nicotinamide nucleotide transhydrogenase [Source:HGNC Symbol;Acc:HGNC:7863]	-1.94034	5.20574	3.49582e-14	8.14993e-13	Down-regulated
ENSG00000278540	ACACA	acetyl-CoA carboxylase alpha [Source:HGNC Symbol;Acc:HGNC:84]	-2.18851	4.86893	3.49734e-14	8.14993e-13	Down-regulated
ENSG00000145220	LYAR	Ly1 antibody reactive [Source:HGNC Symbol;Acc:HGNC:26021]	1.82977	3.61619	3.51589e-14	8.1826e-13	Up-regulated
ENSG00000006534	ALDH3B1	aldehyde dehydrogenase 3 family member B1 [Source:HGNC Symbol;Acc:HGNC:410]	-2.1273	5.60972	3.59511e-14	8.3562e-13	Down-regulated
ENSG00000133961	NUMB	NUMB endocytic adaptor protein [Source:HGNC Symbol;Acc:HGNC:8060]	-1.41258	6.59401	3.61564e-14	8.39313e-13	Down-regulated
ENSG00000182247	UBE2E2	ubiquitin conjugating enzyme E2 E2 [Source:HGNC Symbol;Acc:HGNC:12478]	-3.59325	3.23132	3.68119e-14	8.53431e-13	Down-regulated
ENSG00000159202	UBE2Z	ubiquitin conjugating enzyme E2 Z [Source:HGNC Symbol;Acc:HGNC:25847]	1.20582	8.69176	3.73731e-14	8.65332e-13	Up-regulated
ENSG00000187210	GCNT1	glucosaminyl (N-acetyl) transferase 1 [Source:HGNC Symbol;Acc:HGNC:4203]	-2.25983	5.36319	3.74618e-14	8.66273e-13	Down-regulated
ENSG00000146223	RPL7L1	ribosomal protein L7 like 1 [Source:HGNC Symbol;Acc:HGNC:21370]	1.18582	7.61409	3.79072e-14	8.75452e-13	Up-regulated
ENSG00000162129	CLPB	caseinolytic mitochondrial matrix peptidase chaperone subunit B [Source:HGNC Symbol;Acc:HGNC:30664]	-2.18142	3.94871	3.81733e-14	8.80473e-13	Down-regulated
ENSG00000115183	TANC1	tetratricopeptide repeat, ankyrin repeat and coiled-coil containing 1 [Source:HGNC Symbol;Acc:HGNC:29364]	-3.60211	4.40347	3.82391e-14	8.80602e-13	Down-regulated
ENSG00000177728	TMEM94	transmembrane protein 94 [Source:HGNC Symbol;Acc:HGNC:28983]	-1.748	7.20231	3.82764e-14	8.80602e-13	Down-regulated
ENSG00000205678	TECRL	trans-2,3-enoyl-CoA reductase like [Source:HGNC Symbol;Acc:HGNC:27365]	-3.90739	1.90946	3.85026e-14	8.84678e-13	Down-regulated
ENSG00000137806	NDUFAF1	NADH:ubiquinone oxidoreductase complex assembly factor 1 [Source:HGNC Symbol;Acc:HGNC:18828]	1.58606	4.30841	3.86862e-14	8.87768e-13	Up-regulated
ENSG00000171174	RBKS	ribokinase [Source:HGNC Symbol;Acc:HGNC:30325]	-2.23599	5.51812	3.88498e-14	8.90391e-13	Down-regulated
ENSG00000170540	ARL6IP1	ADP ribosylation factor like GTPase 6 interacting protein 1 [Source:HGNC Symbol;Acc:HGNC:697]	1.40225	7.96413	3.91954e-14	8.97172e-13	Up-regulated
ENSG00000123352	SPATS2	spermatogenesis associated serine rich 2 [Source:HGNC Symbol;Acc:HGNC:18650]	-1.97603	5.32062	3.94582e-14	9.02045e-13	Down-regulated
ENSG00000050438	SLC4A8	solute carrier family 4 member 8 [Source:HGNC Symbol;Acc:HGNC:11034]	-2.58945	2.74403	3.96363e-14	9.04971e-13	Down-regulated
ENSG00000126970	ZC4H2	zinc finger C4H2-type containing [Source:HGNC Symbol;Acc:HGNC:24931]	-1.99699	4.14013	4.02367e-14	9.17519e-13	Down-regulated
ENSG00000235194	PPP1R3E	protein phosphatase 1 regulatory subunit 3E [Source:HGNC Symbol;Acc:HGNC:14943]	-1.68892	5.06274	4.03171e-14	9.18193e-13	Down-regulated
ENSG00000156026	MCU	mitochondrial calcium uniporter [Source:HGNC Symbol;Acc:HGNC:23526]	-2.20032	5.42678	4.10261e-14	9.33164e-13	Down-regulated
ENSG00000186480	INSIG1	insulin induced gene 1 [Source:HGNC Symbol;Acc:HGNC:6083]	-1.63629	7.14817	4.1158e-14	9.3453e-13	Down-regulated
ENSG00000115756	HPCAL1	hippocalcin like 1 [Source:HGNC Symbol;Acc:HGNC:5145]	-2.62412	3.51503	4.11897e-14	9.3453e-13	Down-regulated
ENSG00000101337	TM9SF4	transmembrane 9 superfamily member 4 [Source:HGNC Symbol;Acc:HGNC:30797]	-1.21034	8.60144	4.12463e-14	9.3464e-13	Down-regulated
ENSG00000287486	0	novel transcript	-2.33121	4.08975	4.1302e-14	9.34729e-13	Down-regulated
ENSG00000001461	NIPAL3	NIPA like domain containing 3 [Source:HGNC Symbol;Acc:HGNC:25233]	-1.91359	4.4584	4.15831e-14	9.39913e-13	Down-regulated
ENSG00000023839	ABCC2	ATP binding cassette subfamily C member 2 [Source:HGNC Symbol;Acc:HGNC:53]	-1.5287	8.63416	4.24626e-14	9.58359e-13	Down-regulated
ENSG00000182158	CREB3L2	cAMP responsive element binding protein 3 like 2 [Source:HGNC Symbol;Acc:HGNC:23720]	-2.15375	6.66219	4.25053e-14	9.58359e-13	Down-regulated
ENSG00000149639	SOGA1	suppressor of glucose, autophagy associated 1 [Source:HGNC Symbol;Acc:HGNC:16111]	-1.90221	4.53914	4.25679e-14	9.58573e-13	Down-regulated
ENSG00000285715	0	novel transcript, antisense to TACC2	-2.69949	3.66267	4.29038e-14	9.64935e-13	Down-regulated
ENSG00000111907	TPD52L1	TPD52 like 1 [Source:HGNC Symbol;Acc:HGNC:12006]	-2.02924	4.97884	4.35915e-14	9.79181e-13	Down-regulated
ENSG00000159348	CYB5R1	cytochrome b5 reductase 1 [Source:HGNC Symbol;Acc:HGNC:13397]	1.55074	5.20267	4.3872e-14	9.84258e-13	Up-regulated
ENSG00000134697	GNL2	G protein nucleolar 2 [Source:HGNC Symbol;Acc:HGNC:29925]	1.27515	5.94864	4.43367e-14	9.93451e-13	Up-regulated
ENSG00000086548	CEACAM6	CEA cell adhesion molecule 6 [Source:HGNC Symbol;Acc:HGNC:1818]	2.6651	7.42702	4.44422e-14	9.9458e-13	Up-regulated
ENSG00000151208	DLG5	discs large MAGUK scaffold protein 5 [Source:HGNC Symbol;Acc:HGNC:2904]	-1.43284	5.84444	4.48718e-14	1.00295e-12	Down-regulated
ENSG00000086015	MAST2	microtubule associated serine/threonine kinase 2 [Source:HGNC Symbol;Acc:HGNC:19035]	-1.48757	6.04089	4.50044e-14	1.00467e-12	Down-regulated
ENSG00000108592	FTSJ3	FtsJ RNA 2'-O-methyltransferase 3 [Source:HGNC Symbol;Acc:HGNC:17136]	1.18329	6.77324	4.52775e-14	1.00952e-12	Up-regulated
ENSG00000184232	OAF	out at first homolog [Source:HGNC Symbol;Acc:HGNC:28752]	-2.256	6.18539	4.5776e-14	1.01938e-12	Down-regulated
ENSG00000018699	TTC27	tetratricopeptide repeat domain 27 [Source:HGNC Symbol;Acc:HGNC:25986]	-1.88565	3.98056	4.63352e-14	1.03056e-12	Down-regulated
ENSG00000185798	WDR53	WD repeat domain 53 [Source:HGNC Symbol;Acc:HGNC:28786]	1.72327	4.42626	4.66988e-14	1.03705e-12	Up-regulated
ENSG00000008277	ADAM22	ADAM metallopeptidase domain 22 [Source:HGNC Symbol;Acc:HGNC:201]	-4.21092	3.13026	4.67419e-14	1.03705e-12	Down-regulated
ENSG00000225648	SBDSP1	SBDS pseudogene 1 [Source:HGNC Symbol;Acc:HGNC:21646]	1.56748	6.10451	4.75462e-14	1.0536e-12	Up-regulated
ENSG00000162642	C1orf52	chromosome 1 open reading frame 52 [Source:HGNC Symbol;Acc:HGNC:24871]	2.02826	4.46374	4.82351e-14	1.06756e-12	Up-regulated
ENSG00000215012	RTL10	retrotransposon Gag like 10 [Source:HGNC Symbol;Acc:HGNC:26112]	1.45428	5.19117	4.83824e-14	1.06951e-12	Up-regulated
ENSG00000105388	CEACAM5	CEA cell adhesion molecule 5 [Source:HGNC Symbol;Acc:HGNC:1817]	2.5901	6.41127	4.84996e-14	1.0699e-12	Up-regulated
ENSG00000136950	ARPC5L	actin related protein 2/3 complex subunit 5 like [Source:HGNC Symbol;Acc:HGNC:23366]	1.45235	5.78267	4.85186e-14	1.0699e-12	Up-regulated
ENSG00000079385	CEACAM1	CEA cell adhesion molecule 1 [Source:HGNC Symbol;Acc:HGNC:1814]	2.1803	9.37943	4.86805e-14	1.07216e-12	Up-regulated
ENSG00000156697	UTP14A	UTP14A small subunit processome component [Source:HGNC Symbol;Acc:HGNC:10665]	1.52165	4.89611	4.89163e-14	1.07604e-12	Up-regulated
ENSG00000241635	UGT1A1	UDP glucuronosyltransferase family 1 member A1 [Source:HGNC Symbol;Acc:HGNC:12530]	2.66819	2.46422	5.0443e-14	1.1066e-12	Up-regulated
ENSG00000187736	NHEJ1	non-homologous end joining factor 1 [Source:HGNC Symbol;Acc:HGNC:25737]	-1.77701	5.055	5.04993e-14	1.1066e-12	Down-regulated
ENSG00000198910	L1CAM	L1 cell adhesion molecule [Source:HGNC Symbol;Acc:HGNC:6470]	2.53383	2.9543	5.05544e-14	1.1066e-12	Up-regulated
ENSG00000131089	ARHGEF9	Cdc42 guanine nucleotide exchange factor 9 [Source:HGNC Symbol;Acc:HGNC:14561]	-1.96166	4.34578	5.05898e-14	1.1066e-12	Down-regulated
ENSG00000152990	ADGRA3	adhesion G protein-coupled receptor A3 [Source:HGNC Symbol;Acc:HGNC:13839]	-2.01922	5.37485	5.06718e-14	1.1066e-12	Down-regulated
ENSG00000078403	MLLT10	MLLT10 histone lysine methyltransferase DOT1L cofactor [Source:HGNC Symbol;Acc:HGNC:16063]	-1.90553	6.31087	5.06733e-14	1.1066e-12	Down-regulated
ENSG00000140948	ZCCHC14	zinc finger CCHC-type containing 14 [Source:HGNC Symbol;Acc:HGNC:24134]	-1.87939	6.40199	5.19067e-14	1.13217e-12	Down-regulated
ENSG00000157837	SPPL3	signal peptide peptidase like 3 [Source:HGNC Symbol;Acc:HGNC:30424]	-1.58717	5.99638	5.25625e-14	1.14509e-12	Down-regulated
ENSG00000160584	SIK3	SIK family kinase 3 [Source:HGNC Symbol;Acc:HGNC:29165]	-1.52128	6.47936	5.26338e-14	1.14526e-12	Down-regulated
ENSG00000150459	SAP18	Sin3A associated protein 18 [Source:HGNC Symbol;Acc:HGNC:10530]	1.13659	7.83554	5.27613e-14	1.14665e-12	Up-regulated
ENSG00000141298	SSH2	slingshot protein phosphatase 2 [Source:HGNC Symbol;Acc:HGNC:30580]	-2.05821	4.26651	5.32997e-14	1.15696e-12	Down-regulated
ENSG00000100422	CERK	ceramide kinase [Source:HGNC Symbol;Acc:HGNC:19256]	-1.60888	5.26867	5.34832e-14	1.15874e-12	Down-regulated
ENSG00000115652	UXS1	UDP-glucuronate decarboxylase 1 [Source:HGNC Symbol;Acc:HGNC:17729]	-1.51826	5.66689	5.35098e-14	1.15874e-12	Down-regulated
ENSG00000119899	SLC17A5	solute carrier family 17 member 5 [Source:HGNC Symbol;Acc:HGNC:10933]	-2.05757	6.71914	5.37456e-14	1.16245e-12	Down-regulated
ENSG00000077157	PPP1R12B	protein phosphatase 1 regulatory subunit 12B [Source:HGNC Symbol;Acc:HGNC:7619]	-2.51937	4.08979	5.4526e-14	1.17792e-12	Down-regulated
ENSG00000234996	ACTG1P25	actin gamma 1 pseudogene 25 [Source:HGNC Symbol;Acc:HGNC:54872]	-2.28472	3.48209	5.46968e-14	1.1802e-12	Down-regulated
ENSG00000136295	TTYH3	tweety family member 3 [Source:HGNC Symbol;Acc:HGNC:22222]	-1.74408	5.71227	5.484e-14	1.18187e-12	Down-regulated
ENSG00000146535	GNA12	G protein subunit alpha 12 [Source:HGNC Symbol;Acc:HGNC:4380]	-1.81445	5.10175	5.49376e-14	1.18257e-12	Down-regulated
ENSG00000178035	IMPDH2	inosine monophosphate dehydrogenase 2 [Source:HGNC Symbol;Acc:HGNC:6053]	1.46879	7.8981	5.56365e-14	1.19619e-12	Up-regulated
ENSG00000197780	TAF13	TATA-box binding protein associated factor 13 [Source:HGNC Symbol;Acc:HGNC:11546]	1.68696	4.22781	5.66923e-14	1.21744e-12	Up-regulated
ENSG00000173064	HECTD4	HECT domain E3 ubiquitin protein ligase 4 [Source:HGNC Symbol;Acc:HGNC:26611]	-2.01872	5.32544	5.70602e-14	1.22388e-12	Down-regulated
ENSG00000143190	POU2F1	POU class 2 homeobox 1 [Source:HGNC Symbol;Acc:HGNC:9212]	-2.21291	4.20226	5.74097e-14	1.22992e-12	Down-regulated
ENSG00000121964	GTDC1	glycosyltransferase like domain containing 1 [Source:HGNC Symbol;Acc:HGNC:20887]	-3.29452	2.95507	5.76336e-14	1.23325e-12	Down-regulated
ENSG00000259953	0	novel transcript, overlapping SUSD1	-2.18422	4.0091	5.89871e-14	1.26072e-12	Down-regulated
ENSG00000085063	CD59	CD59 molecule (CD59 blood group) [Source:HGNC Symbol;Acc:HGNC:1689]	1.33565	7.74126	5.91305e-14	1.26229e-12	Up-regulated
ENSG00000236130	PTCSC2	papillary thyroid carcinoma susceptibility candidate 2 [Source:HGNC Symbol;Acc:HGNC:44086]	-2.51618	3.25914	5.94383e-14	1.26736e-12	Down-regulated
ENSG00000133106	EPSTI1	epithelial stromal interaction 1 [Source:HGNC Symbol;Acc:HGNC:16465]	-2.52175	3.7437	6.01102e-14	1.28018e-12	Down-regulated
ENSG00000151726	ACSL1	acyl-CoA synthetase long chain family member 1 [Source:HGNC Symbol;Acc:HGNC:3569]	-2.16474	3.37392	6.03984e-14	1.28377e-12	Down-regulated
ENSG00000174469	CNTNAP2	contactin associated protein 2 [Source:HGNC Symbol;Acc:HGNC:13830]	-1.86628	5.0948	6.04209e-14	1.28377e-12	Down-regulated
ENSG00000164609	SLU7	SLU7 homolog, splicing factor [Source:HGNC Symbol;Acc:HGNC:16939]	1.58781	7.28019	6.04979e-14	1.28389e-12	Up-regulated
ENSG00000148942	SLC5A12	solute carrier family 5 member 12 [Source:HGNC Symbol;Acc:HGNC:28750]	-2.75602	4.98645	6.07644e-14	1.28803e-12	Down-regulated
ENSG00000170085	SIMC1	SUMO interacting motifs containing 1 [Source:HGNC Symbol;Acc:HGNC:24779]	-1.9384	3.9704	6.1441e-14	1.30037e-12	Down-regulated
ENSG00000113494	PRLR	prolactin receptor [Source:HGNC Symbol;Acc:HGNC:9446]	-2.75427	6.30239	6.14905e-14	1.30037e-12	Down-regulated
ENSG00000161547	SRSF2	serine and arginine rich splicing factor 2 [Source:HGNC Symbol;Acc:HGNC:10783]	1.66795	7.90063	6.17687e-14	1.30473e-12	Up-regulated
ENSG00000180901	KCTD2	potassium channel tetramerization domain containing 2 [Source:HGNC Symbol;Acc:HGNC:21294]	1.27133	6.16433	6.23383e-14	1.31522e-12	Up-regulated
ENSG00000108379	WNT3	Wnt family member 3 [Source:HGNC Symbol;Acc:HGNC:12782]	2.10403	3.45316	6.2522e-14	1.31756e-12	Up-regulated
ENSG00000109911	ELP4	elongator acetyltransferase complex subunit 4 [Source:HGNC Symbol;Acc:HGNC:1171]	-2.94942	3.73365	6.31885e-14	1.33005e-12	Down-regulated
ENSG00000236753	MKLN1-AS	MKLN1 antisense RNA [Source:HGNC Symbol;Acc:HGNC:40374]	1.47218	5.54737	6.42385e-14	1.34942e-12	Up-regulated
ENSG00000175662	TOM1L2	target of myb1 like 2 membrane trafficking protein [Source:HGNC Symbol;Acc:HGNC:11984]	-1.5632	4.97001	6.42581e-14	1.34942e-12	Down-regulated
ENSG00000117395	EBNA1BP2	EBNA1 binding protein 2 [Source:HGNC Symbol;Acc:HGNC:15531]	1.59035	5.81793	6.50938e-14	1.36538e-12	Up-regulated
ENSG00000181026	AEN	apoptosis enhancing nuclease [Source:HGNC Symbol;Acc:HGNC:25722]	3.17287	3.69467	6.56338e-14	1.37361e-12	Up-regulated
ENSG00000134569	LRP4	LDL receptor related protein 4 [Source:HGNC Symbol;Acc:HGNC:6696]	-1.68585	6.55317	6.56384e-14	1.37361e-12	Down-regulated
ENSG00000100605	ITPK1	inositol-tetrakisphosphate 1-kinase [Source:HGNC Symbol;Acc:HGNC:6177]	-3.16305	6.03178	6.57706e-14	1.37479e-12	Down-regulated
ENSG00000155465	SLC7A7	solute carrier family 7 member 7 [Source:HGNC Symbol;Acc:HGNC:11065]	-1.76423	9.59747	6.60342e-14	1.3787e-12	Down-regulated
ENSG00000130589	HELZ2	helicase with zinc finger 2 [Source:HGNC Symbol;Acc:HGNC:30021]	2.15101	4.4369	6.62993e-14	1.38264e-12	Up-regulated
ENSG00000165556	CDX2	caudal type homeobox 2 [Source:HGNC Symbol;Acc:HGNC:1806]	-1.72566	7.79329	6.64279e-14	1.38372e-12	Down-regulated
ENSG00000186417	GLDN	gliomedin [Source:HGNC Symbol;Acc:HGNC:29514]	-3.52783	1.90055	6.76105e-14	1.40674e-12	Down-regulated
ENSG00000168003	SLC3A2	solute carrier family 3 member 2 [Source:HGNC Symbol;Acc:HGNC:11026]	1.39949	8.01495	6.79113e-14	1.41137e-12	Up-regulated
ENSG00000114054	PCCB	propionyl-CoA carboxylase subunit beta [Source:HGNC Symbol;Acc:HGNC:8654]	-1.86404	4.64185	6.83473e-14	1.4188e-12	Down-regulated
ENSG00000244879	GABPB1-AS1	GABPB1 antisense RNA 1 [Source:HGNC Symbol;Acc:HGNC:44157]	2.02385	4.35558	6.84279e-14	1.41884e-12	Up-regulated
ENSG00000167378	IRGQ	immunity related GTPase Q [Source:HGNC Symbol;Acc:HGNC:24868]	2.0616	6.23053	6.8762e-14	1.42413e-12	Up-regulated
ENSG00000048342	CC2D2A	coiled-coil and C2 domain containing 2A [Source:HGNC Symbol;Acc:HGNC:29253]	-2.11603	3.12432	7.13203e-14	1.4754e-12	Down-regulated
ENSG00000105983	LMBR1	limb development membrane protein 1 [Source:HGNC Symbol;Acc:HGNC:13243]	-2.0441	5.77112	7.14008e-14	1.4754e-12	Down-regulated
ENSG00000161526	SAP30BP	SAP30 binding protein [Source:HGNC Symbol;Acc:HGNC:30785]	1.5956	6.16954	7.20586e-14	1.48729e-12	Up-regulated
ENSG00000185627	PSMD13	proteasome 26S subunit, non-ATPase 13 [Source:HGNC Symbol;Acc:HGNC:9558]	1.25559	7.73768	7.33012e-14	1.51025e-12	Up-regulated
ENSG00000075239	ACAT1	acetyl-CoA acetyltransferase 1 [Source:HGNC Symbol;Acc:HGNC:93]	-1.38273	6.148	7.33381e-14	1.51025e-12	Down-regulated
[truncated: 6,128 more rows]

## Sheet: IND vs DMSO
GENE ID	GENE SYMBOL	GENE DESCRIPTION	logFC	logCPM	PValue	FDR	Up/Down-regulated
[truncated: 36 more rows]
