# Supplementary material for: Does Bentonite Cause Cytotoxic and Whole-Transcriptomic Adverse Effects in Enterocytes When Used to Reduce Aflatoxin B1 Exposure?
Source: Toxins (Basel). 2022 Jun 26;14(7):435. doi: 10.3390/toxins14070435 (PMC9322703; doi:10.3390/toxins14070435)
Supplement: Supplementary file 1 [file toxins-14-00435-s001.zip › Mucignat & Bassan - SplOnline Table S4 GO enrichment analysis.xlsx]

## Sheet: AFB1.UP
ID	Description	GeneRatio	BgRatio	pvalue	p.adjust	qvalue	geneID	Count
GO:0034470	ncRNA processing	92/1703	375/12386	982588	2.96687e+09	2.84009e+08	ISG20/TUT1/WDR74/BCDIN3D/QTRT1/PPAN/NSUN5/ADAT1/TUT1/NOP56/SRRT/NOLC1/UTP25/UTP6/TRNT1/PUS1/TSR1/LCMT2/KRI1/LYAR/DDX51/NOL8/DDX21/NPM3/CTU2/NOP9/WDR46/SBDS/LIN28A/EBNA1BP2/TRMT5/RRP7A/MRPS11/BYSL/UTP14A/EXOSC2/CLP1/TYW5/BUD23/NOL6/ERI2/NOP2/RIOK2/USB1/UTP3/DDX56/INTS5/TRMT6/MAK16/PDCD11/HELQ/WDR4/DIS3/WDR75/SIRT7/NSUN5P2/NSUN5P1/TP53RK/GTPBP4/DDX27/DDX52/NSUN2/METTL1/UTP15/ELAC1/TRMT10C/SART1/MET…	92
GO:0042254	ribosome biogenesis	76/1703	291/12386	1.13652e+06	2.96687e+09	2.84009e+08	ISG20/WDR74/PPAN/NSUN5/NOP56/NOLC1/UTP25/UTP6/NOP16/LSG1/MTG2/TSR1/KRI1/LYAR/DDX51/NOC2L/NOL8/DDX21/NPM3/NOP9/WDR46/SBDS/EBNA1BP2/RRP7A/PAK1IP1/MRPS11/BYSL/UTP14A/EXOSC2/MPV17L2/BUD23/NOL6/ERI2/NOP2/RIOK2/UTP3/DDX56/MAK16/PDCD11/HELQ/DIS3/WDR75/SIRT7/ABCE1/NSUN5P2/NSUN5P1/GNL2/NMD3/GTPBP4/DDX27/DDX52/UTP15/SART1/METTL25B/MYBBP1A/RPL7L1/FTSJ3/ZNF622/LTO1/UTP4/UTP23/PA2G4/MRM1/WDR55/NOP58/MRM3/MRTO…	76
GO:0002250	adaptive immune response	62/1703	256/12386	3.982e+08	0.00297	0.00284309	IFNA5/BTLA/TNF/LTA/IL23A/TNFSF13B/C8G/WAS/CD79A/LAT2/CD55/CEACAM1/ERCC1/CLCF1/SPN/ZC3H12A/IRF7/HLA-DOB/SEMA4A/TFE3/CD274/EBI3/HLA-DMB/SIRT1/HAVCR2/ANXA1/FGB/C1R/FGA/HLA-DMA/TLR4/HLA-E/B2M/MBL2/LIME1/TXK/JAM3/IRF1/FCER1G/AGER/MICB/IL12A/AZGP1/ICAM1/TNFRSF13C/AHR/NFKB2/TNFRSF11A/UNC13D/MICA/HLA-A/HLA-G/BCL10/RC3H2/CD74/HPX/LAG3/CLU/HLA-B/LIG4/CD86/FOXP3	62
GO:1903706	regulation of hemopoiesis	61/1703	256/12386	8.24428e+08	0.00538042	0.0051505	TNF/H4C3/H4C5/CSF3/IL23A/H4C12/MAFB/IL5/MIR221/TNFSF9/HOXA9/FES/JUN/SOCS1/CEACAM1/ZC3H12A/IRF7/H4C8/CYP26B1/CA2/TFE3/SHH/NME1/NRARP/ANXA1/RBM15/TLR4/VSIR/RARG/NME2/EVI2B/B2M/MYSM1/MDK/IRF1/ZFP36/AGER/ZFP36L1/LDB1/PIAS3/PITHD1/KLF10/ACIN1/TESC/ISG15/SART1/TOB2/GPR137/GATA2/HLA-G/TRIB1/METTL3/RC3H2/VNN1/CD74/LAG3/HLA-B/PAF1/KAT2A/CD86/FOXP3	61
GO:0002544	chronic inflammatory response	8/1703	11/12386	1.40858e+09	0.00817135	0.00782217	TNF/LTA/THBS1/S100A9/PTGES/UNC13D/VNN1/FOXP3	8
GO:0002252	immune effector process	75/1703	359/12386	0.000106208	0.0326183	0.0312245	IFNA5/TNF/LTA/CFP/IL23A/RAET1G/NR4A3/IL5/ULBP2/SEMA7A/C8G/WAS/FES/LAT2/CD55/RGCC/ULBP3/CEACAM1/ERCC1/CLCF1/SPN/ZC3H12A/IRF7/HLA-DOB/SEMA4A/LFNG/NOS2/S100A13/HLA-DMB/SIRT1/HAVCR2/ANXA1/DDX21/C1R/TP53/HLA-DMA/TLR4/HLA-E/IRAK4/B2M/MBL2/TCIM/MDK/RBP4/FCER1G/AGER/IL12A/CD59/AZGP1/ICAM1/LGALS1/AHR/POU2AF1/PLD2/UNC13D/MICA/HLA-A/WNT5A/TUSC2/GATA2/HLA-G/PLEC/CYBC1/APOA2/BCL10/RC3H2/CD74/HPX/LAG3/CLU/HLA-…	75
GO:0031341	regulation of cell killing	17/1703	48/12386	0.000127874	0.0365499	0.034988	IL23A/CD55/CEACAM1/NOS2/HAVCR2/HLA-E/B2M/AGER/IL12A/CD59/AZGP1/ICAM1/MICA/HLA-A/HLA-G/LAG3/HLA-B	17
GO:0009952	anterior/posterior pattern specification	35/1703	136/12386	0.000136665	0.0365499	0.034988	NODAL/CRB2/HOXA9/HOXB6/HOXC9/WNT3/HOXB9/NKX3-1/EMX2/GBX2/LFNG/SHH/NRARP/HES6/TP53/HOXB2/HOXB3/RARG/HOXB4/ETS2/FOXH1/TCAP/HOXA2/LDB1/AXIN2/SRF/FOXC1/TBX3/FOXA2/HOXA4/WNT5A/HES1/HOXA3/KAT2A/HES2	35
GO:0002521	leukocyte differentiation	75/1703	362/12386	0.000140011	0.0365499	0.034988	IFNA5/TNF/CSF3/IL23A/MAFB/TNFSF13B/IL5/TNFSF9/IL11/OSCAR/GPS2/FES/CD79A/DLL4/JUN/JUNB/SOCS1/CEACAM1/CLCF1/EPHA2/SPN/ZC3H12A/IRF7/CYP26B1/CA2/OSTM1/SEMA4A/TFE3/LFNG/SHH/NME1/SIRT1/JMJD6/NRARP/ANXA1/TP53/TLR4/VSIR/NME2/RRAS/EVI2B/B2M/MDK/IRF1/FCER1G/AGER/ZFP36L1/BATF2/PIAS3/FZD7/KLF10/ACIN1/LGALS1/SRF/POU2AF1/TESC/SART1/TOB2/TNFRSF11A/TUSC2/GPR137/GATA2/HLA-G/TRIB1/METTL3/RC3H2/VNN1/CD74/LAG3/SYVN1…	75
GO:0001525	angiogenesis	79/1703	389/12386	0.00018538	0.0439941	0.0421141	NODAL/TNF/SERPINE1/NOX1/MIR221/ECM1/PLK2/CCN1/CCN2/ZNF304/DLL4/CDH5/JUN/EMILIN1/TYMP/APOLD1/RGCC/ADM/FLNA/CEACAM1/NGFR/EPHA2/CXCR4/FGF18/ZC3H12A/SIRT6/TNFRSF12A/ID1/NR4A1/SEMA4A/SLC12A2/CYP1B1/SPHK1/GBX2/SHH/SIRT1/MMRN2/JMJD6/NRARP/ANXA1/SAT1/PTGS2/RBM15/HOXB3/CCL2/THBS1/RRAS/SHC1/EFNB2/MDK/GPX1/HGS/JAM3/MFGE8/HOXB13/GREM1/PLXDC1/IL12A/ENPP2/ITGAX/SRF/PIK3R3/FOXC1/HYAL1/NOTCH4/JMJD8/GADD45A/GJA5/…	79
GO:0033561	regulation of water loss via skin	10/1703	21/12386	0.000194954	0.0442546	0.0423635	CYP26B1/SFN/GRHL3/STMN1/SRF/ALOXE3/ELOVL1/PLEC/LSR/ABCA12	10

## Sheet: AFB1.DOWN
ID	Description	GeneRatio	BgRatio	pvalue	p.adjust	qvalue	geneID	Count
GO:0001505	regulation of neurotransmitter levels	48/2706	145/12386	0.0010979	0.025974	0.0225511	PRKN/CACNB2/ADCY1/MAOA/UNC13C/SYT2/ABAT/PPP1R9A/LIN7A/COLQ/PAH/CASK/RIMS4/MCTP2/SYT11/UNC13B/MAOB/SLC4A8/RHOT1/GABRA2/DTNBP1/ERC2/PTPRN2/DRD2/SYT1/PCLO/CHRNB4/NCS1/KCNMB4/GCHFR/SLC6A4/GSK3B/PIP5K1C/CTBP2/RIMS3/SYT7/RAB3A/ALDH5A1/KCNJ10/BACE1/COMT/MEF2C/SLC22A3/SLC22A2/GAD1/PNKD/FBXL20/ITGB3	48
GO:0001539	cilium or flagellum-dependent cell motility	27/2706	73/12386	0.00224957	0.0386439	0.0335513	DNAH11/SLC22A16/DNAH6/RFX3/NPHP4/DNAH8/CELF3/DNAAF11/CFAP43/ARMC2/CFAP44/TTLL1/DNAH1/SLC9B1/RGN/ATP2B4/CFAP65/APOB/VPS13A/CCDC65/SORD/SLC9B2/ASH1L/SPEF2/ADCY3/DPCD/EFHC1	27
GO:0002062	chondrocyte differentiation	32/2706	83/12386	0.000399636	0.0135575	0.0117708	SOX5/SOX6/SULF1/EXT1/SCIN/GPLD1/HMGA2/BMPR2/COL27A1/ANXA6/MAF/BMPR1A/CREB3L2/SMPD3/RFLNB/SCX/ZBTB16/PTH1R/WNT5B/SULF2/TSKU/IFT80/NFIB/RARB/SMAD3/GLG1/MEF2C/WNT2B/SLC39A14/RUNX3/COL2A1/BPNT2	32
GO:0002790	peptide secretion	59/2706	176/12386	0.00021816	0.00926578	0.0080447	KCNB1/ADCY5/PRKN/ABAT/VSNL1/SLC16A10/ABCA1/EIPR1/RFX3/PRKCE/STXBP4/BMP8A/TIAM1/UCN3/GPLD1/JAK2/BRSK2/LRP5/ANO1/NDUFAF2/ACVR1C/HADH/PPP3CA/PLA2G6/EGFR/ILDR2/MCU/SMPD3/PTPRN2/KLF7/DRD2/AACS/ICA1/TRPV1/PCLO/TCF7L2/LRP1/ARNTL/NR0B2/HMGN3/CFTR/CLOCK/HNF1B/ACSL4/FAM3B/SYT7/HFE/SLC9B2/APLN/HNF1A/LTBP4/CPT1A/MPC2/PFKL/NR1H4/PCK2/HNF4A/RAB11FIP5/PPARD	59
GO:0003012	muscle system process	91/2706	279/12386	1.71764e+09	0.00168453	0.00146254	KCND3/KCNJ3/AKAP6/CACNA1D/SORBS2/PRKCA/HDAC4/FGF13/CACNB2/ANK2/PLCE1/GATA4/SNTB1/ABAT/SULF1/KCNMA1/CAMK2D/CTNNA3/KLF15/DTNA/ARHGAP42/RYR2/KCNQ1/TTN/AIF1/CHRNA1/TIAM1/UTRN/PPP1R12B/SLC8A1/GTF2IRD1/GPD1L/SCN5A/JARID2/ANXA6/MYLK/PPP3CA/TRPC3/PLA2G6/MYL3/KCNIP2/MAP2K6/APBB2/DRD2/TRPV1/NEDD4L/RAP1GDS1/HTR1D/NOS1AP/BIN1/SULF2/MYOM1/SSPN/DOCK4/GATM/ATP2B4/KCNH2/ZDHHC21/MYH14/NPNT/TRIM63/AKAP9/CALD1/PAK1…	91
GO:0003013	circulatory system process	134/2706	388/12386	382116	4.12227e+08	3.57902e+07	KCND3/KCNJ3/CACNA1D/HDAC4/SLC2A13/RNLS/FGF13/CACNB2/ANK2/IMMP2L/ABCC4/AR/TRHDE/GATA4/ABAT/ANGPT1/THRB/PDE3A/ATP8A1/EXT1/PTPRJ/KCNMA1/CAMK2D/CTNNA3/SLC6A9/SLC28A2/ARHGAP42/RYR2/PCSK5/KCNQ1/TTN/GAS6/JAK2/SLC4A8/LRP5/DDAH1/SLC8A1/SLC5A1/INSR/GPD1L/ECE1/BMPR2/CPS1/SCN5A/PLA2G6/SLC2A5/MYL3/KCNIP2/EGFR/MAP2K6/MYLK3/LEPR/HEG1/CTNNBIP1/DRD2/STK39/EXT2/CELF2/TRPV1/SLC44A1/ABCC9/SLC38A5/NEDD4L/RAP1GDS1/HTR…	134
GO:0003014	renal system process	28/2706	75/12386	0.0016002	0.032207	0.0279627	AQP4/SULF1/KCNMA1/MYO5B/PCSK5/KCNQ1/TMEM63C/GAS6/ADGRF5/DRD2/TRPV1/CHRNB4/SULF2/SLC4A5/NPR1/BCL2/AQP3/MYO1E/SLC9A3R1/AQP1/HNF1A/COMT/SERPINF2/WFS1/EDNRB/AKR1C3/AGT/CYP4F2	28
GO:0003382	epithelial cell morphogenesis	14/2706	30/12386	0.0021961	0.0384548	0.0333871	PKHD1/AR/SIPA1L3/CCDC88C/ARHGEF26/HEG1/COL18A1/BCL11B/RILPL1/RILPL2/FLNB/DACT2/RAB25/ST14	14
GO:0006575	cellular modified amino acid metabolic process	49/2706	149/12386	0.00115239	0.0271441	0.0235669	SARDH/ALDH1L1/SULT1B1/SLC16A10/BBOX1/NAT8/ASS1/PEMT/HOGA1/GSTA1/GCNT4/CKB/CPQ/TG/MBOAT1/GSTM4/OSBPL10/SHMT1/PTDSS1/VNN2/PIPOX/SLC22A4/SULT2A1/SLC19A1/GATM/CRYM/GSTA2/TMLHE/IYD/IDH1/CROT/SLC1A1/GSTM1/SLC27A1/ABHD12/CPT1A/GSTO1/DUOX2/GAMT/OSBPL8/PRODH/GSTZ1/ALDH7A1/SLC6A8/CRAT/DIO1/TYMS/HPN/MTHFS	49
GO:0006766	vitamin metabolic process	35/2706	90/12386	0.000179155	0.00798648	0.00693399	CLYBL/TPK1/SLC19A3/MCCC1/SLC23A2/HLCS/RPE65/SHMT1/CYP4F3/VNN2/SLC19A1/CYP2W1/CYP3A4/CYP27A1/RGN/ABCC1/PSAT1/TTPA/MMAB/VKORC1L1/CBR1/BTD/LRP2/LRAT/GSTO1/SLC23A1/LMBRD1/GFI1/AKR1A1/AKR1C3/RBP2/SLC52A3/CYP4F2/PPARD/MTHFS	35
GO:0006790	sulfur compound metabolic process	94/2706	280/12386	3.27419e+08	0.0005046	0.000438101	GHR/MSRA/NDST4/KYNU/GLYAT/CHST9/ACSM2A/XYLT1/TPK1/ANGPT1/SULT1B1/SULT1E1/NUBPL/SLC10A7/NAT8/EXT1/PEMT/XDH/ACSM2B/SLC26A1/GSTA1/FAR2/ACACB/MAT1A/AHCYL2/SLC19A3/MCCC1/ACOT7/PDK3/HLCS/CPS1/ELOVL7/TPST1/GSTM4/DGAT2/ACACA/SUCLG2/ACSL1/TPST2/CHST13/LYRM4/ELOVL6/EXT2/PHGDH/PIPOX/NDST1/SULT2A1/ABCB7/GSTA2/PAPSS2/PDK1/SLC26A2/HMGCS2/B3GNT7/ENPP1/IDH1/PAPSS1/ACOT4/GLCE/SLC1A1/ABCC2/ACSM3/GSTM1/ACSM1/ACSL4/…	94
GO:0006813	potassium ion transport	41/2706	118/12386	0.000850496	0.0221622	0.0192416	KCND3/KCNB1/KCNJ3/AKAP6/CACNA1D/ANK2/WWP2/KCNMA1/KCNQ1/SLC12A8/WNK2/ANK3/SLC9A2/KCNIP2/KCNT1/ANO6/KCNAB2/SLC9A7/DRD2/STK39/ABCC9/NEDD4L/NOS1AP/BIN1/KCNMB4/NEDD4/KCNH2/KCNJ16/AKAP9/SLC9A3/KCNK10/KCNN1/AQP1/DLG1/KCNJ10/KCNH4/SLC12A6/ATP1B1/AMIGO1/ATP1A1/HPN	41
GO:0006814	sodium ion transport	69/2706	162/12386	217022	3.90205e+08	3.38782e+08	FGF13/SLC10A1/SLC5A11/SCN9A/SLC10A7/COMMD1/SCN8A/CAMK2D/SLC6A9/PRKCE/KCNQ1/SLC10A2/SLC38A4/SLC5A12/WNK2/ANK3/SLC4A8/UTRN/SLC23A2/SLC8A1/SLC5A1/SLC9A2/GPD1L/SCN5A/SLC38A6/SLC17A1/ANO6/SHROOM2/SLC28A3/SLC9A7/DRD2/STK39/CNKSR3/NKAIN3/SLC5A9/PCSK9/SLC34A3/NEDD4L/SLC6A19/SLC22A4/SLC4A5/SLC9B1/SLC13A2/NEDD4/SLC38A11/MFSD4B/ATP2B4/SLC6A4/SLC38A3/GLRX/SLC9A3/SLC9A3R1/SLC13A5/NKAIN4/SLC5A3/DLG1/DMD/SLC9B2…	69
GO:0006836	neurotransmitter transport	47/2706	135/12386	0.000352084	0.0127995	0.0111128	PRKN/CACNB2/ADCY1/UNC13C/SYT2/SV2B/PPP1R9A/LIN7A/CASK/RIMS4/SLC6A9/MCTP2/SLC28A2/SYT11/UNC13B/SLC4A8/RHOT1/GABRA2/DDC/DTNBP1/ERC2/PTPRN2/DRD2/SYT1/ICA1/PCLO/CHRNB4/NCS1/KCNMB4/SLC6A4/GSK3B/PIP5K1C/SLC1A1/CTBP2/RIMS3/SYT7/RAB3A/KCNJ10/SLC6A6/BACE1/MEF2C/SLC22A3/SLC6A8/SLC22A2/PNKD/FBXL20/ITGB3	47
GO:0006869	lipid transport	100/2706	294/12386	8.17825e+07	0.000254637	0.00022108	GRAMD1B/PRKN/OSBPL6/ABCC4/PLA2G4A/SLC10A1/SLCO1A2/ABCA1/PITPNC1/SLC10A7/ATP8A1/ATP9A/ATP10B/PITPNM2/CYP8B1/RXRA/KCNQ1/DENND5B/FABP2/SLC10A2/ABCA3/ABCA10/ATP8B4/MYB/FABP6/MSR1/ATP9B/SLC27A2/PLA2G6/PITPNM3/EGF/TEX2/ESYT3/SCARB1/MAP2K6/ANO6/ACSL1/ATP11A/DRD2/OSBPL10/CYP7A1/ENPP7/PCSK9/ATP10D/GULP1/LRP1/SOAT2/ABCC11/TSKU/NR0B2/XKR6/NPC1L1/TTC39B/LIPC/APOB/CROT/CFTR/OSBP2/VLDLR/ABCC2/ABCC1/SLC27A1/ACS…	100
GO:0006873	cellular ion homeostasis	126/2706	414/12386	2.15573e+09	0.00187759	0.00163015	PRKD1/AKAP6/ADCY5/CACNB2/ANK2/ITPR2/PKHD1/PLCE1/CHRNA7/SLC10A7/KCNMA1/CAMK2D/MICU1/SLC6A9/JPH2/PRKCE/SLC11A2/RYR2/STIM1/KCNQ1/ITPR1/CP/CLDN16/JAK2/TRPC7/SLC4A8/SLC8A1/SLC9A2/GRIN2B/CX3CR1/XPR1/TMEM178A/LPAR1/TTC7A/CKB/ANXA6/SLC30A10/VDR/TRPC3/PLA2G6/MCU/PLCG2/DISC1/SLC40A1/SLC9A7/DRD2/HTT/TSPOAP1/AP3B1/TMPRSS6/CDH23/TRPV1/ACKR3/SLC34A3/NEDD4L/RAP1GDS1/PTH1R/NCS1/GPR157/XCL1/LRP1/ATP7B/SLC4A5/SLC9…	126
GO:0006935	chemotaxis	103/2706	367/12386	0.00262507	0.044111	0.0382979	PRKD1/CNTN4/PLXNC1/COLEC10/CDH4/CRPPA/SEMA5B/SEMA5A/PTPRM/DSCAML1/VSTM2L/RIN3/ANGPT1/PREX1/NEO1/PRKCQ/EXT1/PTPRJ/EPHA6/ALCAM/FER/TRIO/EPHB2/NRCAM/CMTM8/AIF1/NRXN3/TNFSF18/TIAM1/GAS6/LOX/ROBO1/SEMA4D/BMPR2/CX3CR1/LPAR1/RPS6KA5/PLA2G6/OPHN1/MMP28/DAPK2/PTK2/MCU/ANO6/PLD1/KLF7/STK39/MPP1/CMTM7/SERPIND1/IGSF9/UNC5B/CAMK1D/PIK3CB/F7/SEMA6C/ACKR3/LYST/XCL1/ITGA1/ARHGAP35/LRP1/NTF3/DOCK4/PLXNA2/NOTCH2/L…	103
GO:0007015	actin filament organization	102/2706	356/12386	0.00133793	0.029577	0.0256792	DIAPH2/PRKN/SORBS2/SEMA5A/PPP1R9A/CGNL1/CYFIP2/PREX1/EVL/NEB/FCHSD2/CRACD/CTNNA3/FER/PRKCE/SCIN/MYO5B/COBL/SORBS1/MYO1D/MTSS1/TTN/CARMIL1/AIF1/FAM171A1/JAK2/LPAR1/SHROOM4/IQGAP2/CLASP1/ITGB5/ALMS1/SVIL/MCU/SHROOM2/ARHGAP18/SSH2/CORO7/RFLNB/ARHGAP25/SH3KBP1/NCK2/SPATC1L/ARHGEF10L/MYO15A/PHLDB2/SHANK3/BIN1/ARHGAP35/ARFGEF1/SRC/KANK1/PFN2/PSTPIP2/BCL2/MYO5C/LIMCH1/ACTN1/NCKAP1L/PLS1/CAPZB/CALD1/PAK1…	102
GO:0007163	establishment or maintenance of cell polarity	59/2706	189/12386	0.00162957	0.0325551	0.0282649	PARD3B/FGF13/PKHD1/BCAS3/LIN7A/SIPA1L3/MPP7/PARD3/PARD6G/KIF26B/PARVB/DOCK8/BRSK2/WDPCP/MAP4/CD3G/MYO9A/CLASP1/OPHN1/SDCCAG8/PTK2/CAP2/PRKCZ/HTT/CDK5RAP2/ALPK2/DOCK7/MTCL1/ARHGAP35/PATJ/ARFGEF1/MAP7/CDX2/KANK1/GSK3B/NCKAP1L/WWC1/PAK1/AMOTL1/DLG5/SLC9A3R1/AQP1/DLG1/RUFY3/PDLIM1/RHOBTB3/CYTH3/AMOT/FBXW11/GBF1/CLASP2/WNT11/CTNNA1/NUMA1/PTK7/TRAF3IP2/KIF20B/LAMA1/SYNJ2BP	59
GO:0007586	digestion	32/2706	78/12386	0.00010308	0.00567362	0.00492593	MOGAT2/EPB41/CRACD/ASAH2/CYP8B1/KCNQ1/FABP2/UCN3/SLC5A1/VDR/AKR1D1/SLC2A5/SCARB1/PBLD/SNX10/STK39/ENPP7/TRPV1/SOAT2/PIR/AKR1C2/NPC1L1/PLS1/TJP2/ACO1/AKR1C1/AQP1/TFF3/CHRM3/LIMA1/SI/TFF2	32
GO:0007610	behavior	108/2706	359/12386	0.000136037	0.00680863	0.00591136	GRID1/DAB1/ADCY5/PRKN/HDAC4/BTBD9/SHANK2/FGF13/ADCY1/HIPK2/CPEB3/ADAM22/KLHL1/ABAT/CHRNA7/DNAH11/THRB/RPTOR/TANC1/SCN9A/GPR176/PLCB1/TTBK1/ATP8A1/EXT1/NCOA1/NPHP4/PRKCE/SLC11A2/CRTC1/SYT11/PRKAR1B/ATXN1/EPHB2/KCNQ1/NRXN3/GCNT4/INSR/TLR2/NCOA2/GRIN2B/TTC36/CX3CR1/ANKH/ADGRF1/PLA2G6/EGFR/ADARB1/LEPR/PRKCZ/LGI4/ZFHX3/DRD2/HTT/SDK1/MBD5/CDH23/FIG4/TRPV1/UBR3/MYO15A/CNTNAP2/HTR1D/SHANK3/GPR157/ZFHX2/M…	108
GO:0007613	memory	29/2706	74/12386	0.000535862	0.0159636	0.0138599	BTBD9/FGF13/ADCY1/CPEB3/CHRNA7/PLCB1/CRTC1/SYT11/ATXN1/INSR/TTC36/CX3CR1/ADGRF1/PLA2G6/PRKCZ/DRD2/SHANK3/MAPT/NTF3/CCND2/JPH3/SLC6A4/VLDLR/SLC1A1/KCNK10/EIF2AK4/COMT/PAK6/MTOR	29
GO:0008202	steroid metabolic process	79/2706	251/12386	0.000222994	0.00939711	0.00815873	OSBPL6/SULT1B1/ABCA1/SULT1E1/PBX1/MALRD1/CUBN/G6PC1/CYP8B1/RXRA/PRLR/LRP5/CYP2C19/CYP2E1/SLC27A2/AKR1D1/SCARB1/DGAT2/LEPR/CYP17A1/CYP7A1/PCSK9/HSD3B1/SULT2A1/FAXDC2/SOAT2/AKR1C2/CYP3A4/FMO5/CAT/TSKU/CYP27A1/EPHX2/NR0B2/HMGCS2/LIPE/INSIG1/NPC1L1/LIPA/UGT2B17/TTC39B/LIPC/APOB/CFTR/VLDLR/HSD17B2/CYP2C8/SERPINA6/ACAT1/DHRS2/AKR1C1/LRP2/ATP8B1/OSBPL3/INSIG2/RDH16/LSS/ABCA5/LIMA1/HSD17B14/OSBPL1A/COMT/…	79
GO:0008286	insulin receptor signaling pathway	40/2706	98/12386	1.71618e+09	0.00168453	0.00146254	PID1/IGF1R/PRKCQ/FER/SORBS1/STXBP4/SORL1/GPLD1/INSR/PTPRA/PTPRE/RPE65/C2CD5/GKAP1/PRKCZ/GRB14/SESN3/SOGA1/SRC/KANK1/ENPP1/GSK3B/PAK1/AHSG/AP3S1/PIP4K2A/GRB10/OSBPL8/GAB1/SMARCC1/SLC39A14/SIK2/IGF2/AGT/FOXO4/CCND3/PIK3R1/FOXO1/VWA2/PDK2	40
GO:0009308	amine metabolic process	29/2706	81/12386	0.00278193	0.0464574	0.0403351	PRKN/MAOA/KYNU/ABAT/SULT1B1/PAH/MAOB/DDC/DRD2/SLC44A1/DAO/SLC7A7/NPR1/ATP2B4/SLC1A1/ABCC2/ITGAM/SULT1C2/COMT/NR1H4/ALDH7A1/SLC22A3/ITGB2/CHKA/PNKD/ATP7A/NAPEPLD/NAAA/AZIN2	29
GO:0009410	response to xenobiotic stimulus	112/2706	346/12386	2.8671e+08	0.000479434	0.000416252	DAB1/HDAC4/MGMT/OTC/FMO1/ADCY1/GLYAT/ABCC4/PTPRM/GATA4/SLC10A1/ABAT/SULT1B1/PDE3A/RPTOR/ABCA1/NFATC2/NAT8/ASS1/NCOA1/FBP1/PEMT/ACSM2B/GSTA1/ACACB/KCNQ1/TGFA/CYTB/MAOB/ABCA3/TP73/GAS6/LOX/GPLD1/SLC8A1/HMGA2/CPS1/CYP2C19/CMBL/CYP2E1/HADH/PAM/GSTM4/DDC/CYBB/EGFR/MAP2K6/ACSL1/DRD2/AACS/RB1/RPH3AL/GNA12/SULT2A1/CYP2W1/SRC/CYP3A4/CERS1/FMO5/CAT/GSTA2/QDPR/KCNH2/BCL2/SLC6A4/TIMP4/LYN/CYP2U1/NCKAP1L/ABCC…	112
GO:0009611	response to wounding	119/2706	406/12386	0.000209874	0.0089846	0.00780057	PRKCA/PLA2G4A/MAP3K5/TSPAN32/GATA4/ABAT/ADTRP/ENTPD1/PRKCQ/EXT1/CASK/PRKCE/ITPK1/VAV2/SYT11/EPHB2/ITGB6/TGFA/AIF1/GAS6/LOX/JAK2/CX3CR1/FGFR2/ANXA6/MYLK/PPP3CA/CLASP1/GNAQ/DYSF/DTNBP1/SCARB1/EGFR/FUT10/PTK2/ANO6/CREB3L2/PLCG2/DRD2/SERPIND1/MRTFA/VWF/AP3B1/PIK3CB/F7/NREP/CLDN19/ITGA9/NLRP6/PHLDB2/GNA12/ARHGAP35/LRP1/WNT5B/SULF2/ARFGEF1/SRC/KANK1/TSKU/KIAA0319/SLC11A1/BCL2/PTPRF/NOTCH2/PROS1/LYN/ODA…	119
GO:0009636	response to toxic substance	62/2706	190/12386	0.00035184	0.0127995	0.0111128	PRKN/MGMT/GLYAT/PPP1R9A/IPCEF1/SLC47A1/SCN9A/ASS1/FBLN5/ALOX5AP/GSTA1/SLC47A2/CYTB/MAOB/MBP/FANCC/TLR2/CPS1/AQP10/SLC30A10/NXN/ALB/DDC/DRD2/NNT/EHMT1/ATP7B/CERS1/CAT/EPHX2/BCL2/MTARC1/SLC6A4/LYN/WDR35/PRDX6/ABCC2/GSTM1/TRPM6/GLRX/DHRS2/ABTB2/ARG1/MGST3/GSTO1/PRXL2A/DUOX2/ALDH1A1/SLC23A1/PDGFRB/ASNS/GSTZ1/PDZK1/SLC30A4/ARHGAP33/CHKA/AKR1A1/BLMH/ATP7A/TYMS/SDC1/ESD	62
GO:0009914	hormone transport	66/2706	217/12386	0.00187569	0.0348878	0.0302901	KCNB1/ADCY5/PRKN/ABAT/VSNL1/SLC16A10/EIPR1/RFX3/PRKCE/STXBP4/BMP8A/KCNQ1/TIAM1/UCN3/GPLD1/JAK2/BRSK2/MYB/LRP5/ANO1/NDUFAF2/ACVR1C/HADH/PPP3CA/PLA2G6/C1QTNF3/EGFR/ILDR2/MCU/SMPD3/PTPRN2/KLF7/DRD2/AACS/ICA1/PCLO/TCF7L2/RAB11FIP3/LRP1/SERPINA7/ARNTL/CRYM/NR0B2/HMGN3/LYN/CFTR/CLOCK/ABCC2/HNF1B/ACSL4/FAM3B/SYT7/HFE/SLC9B2/APLN/HNF1A/LTBP4/CPT1A/MPC2/PFKL/NR1H4/PCK2/HNF4A/AGT/RAB11FIP5/PPARD	66
GO:0010817	regulation of hormone levels	111/2706	358/12386	2.74939e+09	0.00221346	0.00192176	GHR/KCNB1/ADCY5/PRKN/CHST9/ABAT/PCSK6/SULT1B1/VSNL1/SLC16A10/SULT1E1/EIPR1/RFX3/PRKCE/STXBP4/BMP8A/PCSK5/KCNQ1/TIAM1/GCNT4/UCN3/GPLD1/JAK2/BRSK2/MYB/LRP5/ANO1/NDUFAF2/ECE1/ACVR1C/HADH/PPP3CA/PLA2G6/CPQ/TG/AKR1D1/RPE65/C1QTNF3/SCARB1/DGAT2/EGFR/ILDR2/MCU/SMPD3/PTPRN2/KLF7/CYP17A1/DRD2/AACS/ICA1/PCLO/HSD3B1/TCF7L2/RAB11FIP3/SULT2A1/LRP1/SERPINA7/CYP2W1/AKR1C2/CYP3A4/ARNTL/CRYM/NR0B2/LIPE/HMGN3/LYN/…	111
GO:0010876	lipid localization	110/2706	335/12386	1.64936e+08	0.000355866	0.000308969	GRAMD1B/PRKN/OSBPL6/ABCC4/PLA2G4A/FTO/SLC10A1/SLCO1A2/ABCA1/PITPNC1/SLC10A7/ATP8A1/ATP9A/ATP10B/PITPNM2/ACACB/CYP8B1/RXRA/KCNQ1/DENND5B/FABP2/SLC10A2/ABCA3/ABCA10/ATP8B4/MYB/FABP6/MSR1/ATP9B/SLC27A2/ACVR1C/PLA2G6/PITPNM3/EGF/TEX2/ESYT3/SCARB1/DGAT2/MAP2K6/ANO6/ACSL1/ATP11A/DRD2/OSBPL10/CYP7A1/ENPP7/PCSK9/ATP10D/GULP1/LRP1/SOAT2/CDS1/ABCC11/TSKU/NR0B2/XKR6/NPC1L1/ENPP1/TTC39B/LIPC/APOB/CROT/CFTR/O…	110
GO:0014046	dopamine secretion	12/2706	18/12386	5.63586e+09	0.00375306	0.00325847	PRKN/SYT2/ABAT/SYT11/DTNBP1/SYT13/DRD2/SYT1/SYT17/CHRNA4/SYT7/RAB3A	12
GO:0014059	regulation of dopamine secretion	12/2706	18/12386	5.63586e+09	0.00375306	0.00325847	PRKN/SYT2/ABAT/SYT11/DTNBP1/SYT13/DRD2/SYT1/SYT17/CHRNA4/SYT7/RAB3A	12
GO:0015012	heparan sulfate proteoglycan biosynthetic process	11/2706	21/12386	0.0020687	0.0371952	0.0322935	NDST4/XYLT1/EXT1/HS2ST1/EXT2/TCF7L2/PXYLP1/NDST1/HS6ST2/GLCE/HS6ST1	11
GO:0015721	bile acid and bile salt transport	12/2706	22/12386	0.000809852	0.021309	0.0185008	ABCC4/SLC10A1/SLCO1A2/SLC10A7/SLC10A2/CYP7A1/ABCC11/NR0B2/ABCC2/AKR1C1/ATP8B1/SLC51B	12
GO:0015850	organic hydroxy compound transport	75/2706	189/12386	1.8645e+06	1.43673e+09	1.24739e+08	KCNB1/GRAMD1B/PRKN/OSBPL6/SLC2A13/SYT2/ABCC4/SLC10A1/ABAT/SLC5A11/SLCO1A2/ABCA1/SLC10A7/SYT11/CYP8B1/RXRA/KCNQ1/MAOB/SLC10A2/ABCA3/SLC5A12/MYB/MSR1/SLC5A1/AQP10/EGF/DTNBP1/SCARB1/SYT13/DRD2/OSBPL10/SYT1/CYP7A1/ENPP7/PCSK9/SYT17/LRP1/SOAT2/CHRNA4/ABCC11/TSKU/NR0B2/NPC1L1/SLC6A4/TTC39B/LIPC/APOB/CFTR/AQP3/OSBP2/ABCC2/SYT7/AKR1C1/AQP1/ATP8B1/OSBPL3/MTTP/SLC5A3/RAB3A/PIP4K2A/PPARG/ABCA5/LIMA1/OSBPL1A…	75
GO:0016042	lipid catabolic process	84/2706	252/12386	1.45122e+09	0.00153488	0.00133261	PLCH1/PLA2G4A/PLCE1/GBA3/PCCA/ADTRP/SULT1E1/PLCB1/ASAH2/AIG1/PRKCE/ACACB/FAAH2/PDE3B/SORL1/GPLD1/PLA2G4E/PCK1/PNPLA7/CPS1/SLC27A2/HADH/PLA2G6/AKR1D1/SCARB1/SMPD3/PLCG2/ACAD11/PLD1/ACER3/CYP7A1/BDH2/AOAH/ENPP7/CYP4F3/PCCB/ACOX3/SULT2A1/LRP1/LONP2/CYP2W1/CYP3A4/CYP27A1/LIPE/THRA/ACAD10/LIPA/LIPC/IDH1/APOB/CROT/ACAT2/PRDX6/AUH/PAFAH2/ACOX2/ACAT1/ABHD12/LPIN1/CRTC3/CPT1A/PNPLA1/ABHD2/HSD17B14/DDHD1/N…	84
GO:0016311	dephosphorylation	101/2706	346/12386	0.000714161	0.0197548	0.0171514	INPP4B/LHPP/PTPRG/MGAT5/INPP5A/PTPRM/PTPRK/PTPRJ/FBP1/PTPRD/CPPED1/PPP2R3A/G6PC1/BTRC/SGPP2/SMG6/PPP2R2B/GPLD1/STYXL2/JAK2/PPM1L/SEMA4D/PPP4R4/CHP2/PPM1H/TNS3/RNGTT/PPP3CA/PTPRA/PTPRE/CA3/PFKFB1/PTPRN2/PTPRU/PHLPP1/LRRK1/SSH2/DRD2/HTT/CTDSPL/FIG4/PTP4A1/PUDP/PXYLP1/PTPRR/ITGA1/CDCA2/SRC/RGN/EPHX2/PPP1R3E/CDC14B/ACP6/BCL2/PPP1R36/PTPRF/INPP4A/GSK3B/CDC25C/SPPL3/PLPP3/NCKAP1L/NT5DC1/NPNT/CDC14A/PTP…	101
GO:0018958	phenol-containing compound metabolic process	30/2706	71/12386	8.83332e+09	0.00501546	0.00435451	OCA2/PRKN/BTBD9/MAOA/ABAT/SULT1B1/SLC16A10/PAH/MAOB/GCNT4/CYP2E1/CPQ/TG/DDC/DRD2/DAO/SULT2A1/NPR1/CRYM/BCL2/IYD/SLC1A1/ITGAM/DUOX2/COMT/ITGB2/DIO1/PNKD/ATP7A/HPN	30
GO:0019693	ribose phosphate metabolic process	98/2706	326/12386	0.000280192	0.0109997	0.00955013	DPYD/ADCY5/HDAC4/ADCY1/KYNU/GLYAT/ADK/ACSM2A/ADCY9/SULT1B1/SULT1E1/PID1/CASK/FBP1/XDH/ACSM2B/SLC26A1/FAR2/ACACB/ATP8/PANK1/GUCY2D/NME7/ATP6/ACOT7/INSR/PDK3/PKLR/ELOVL7/TPST1/ALDOB/DGAT2/CTPS2/ACACA/PFKFB1/PDE10A/SUCLG2/ACSL1/TPST2/MAGI3/CARD11/AK9/ELOVL6/MPP1/PGM1/SLC25A12/MTCO2P12/AMPD3/PDE8A/PIPOX/SULT2A1/UCK2/COX2/GPD1/NPR1/NUDT3/PAPSS2/UPB1/PDK1/SLC26A2/HMGCS2/ENPP1/CROT/PAPSS1/ACOT4/ACSM3/AK…	98
GO:0022600	digestive system process	26/2706	65/12386	0.000708742	0.0197059	0.017109	MOGAT2/EPB41/CRACD/CYP8B1/KCNQ1/FABP2/SLC5A1/VDR/SLC2A5/SCARB1/PBLD/SNX10/STK39/ENPP7/TRPV1/SOAT2/NPC1L1/PLS1/TJP2/ACO1/AKR1C1/AQP1/TFF3/CHRM3/LIMA1/TFF2	26
GO:0023061	signal release	101/2706	322/12386	3.73716e+09	0.0027614	0.0023975	KCNB1/ADCY5/PRKN/CACNB2/ADCY1/UNC13C/SYT2/ABCC4/PLA2G4A/ABAT/PPP1R9A/VSNL1/LIN7A/SLC16A10/ABCA1/EIPR1/CASK/RIMS4/RFX3/MCTP2/PRKCE/STXBP4/BMP8A/SYT11/PCSK5/KCNQ1/UNC13B/MAOB/TIAM1/UCN3/GPLD1/JAK2/SLC4A8/BRSK2/MYB/LRP5/ANO1/NDUFAF2/ACVR1C/HADH/PPP3CA/RHOT1/PLA2G6/C1QTNF3/DTNBP1/EGFR/ILDR2/MAP2K6/MCU/ERC2/SMPD3/PTPRN2/SYT13/KLF7/DRD2/SYT1/AACS/ICA1/PCLO/TCF7L2/CHRNB4/NCS1/SYT17/RAB11FIP3/LRP1/KCNMB4…	101
GO:0030031	cell projection assembly	138/2706	440/12386	1.50745e+08	0.0003388	0.000294152	HDAC4/TNIK/PKHD1/ABCC4/PLCE1/BCAS3/PPP1R9A/EVL/DYNC2H1/BBS9/RFX3/FER/IFT140/SCIN/COBL/VAV2/TBC1D30/DNAH8/MTSS1/SPATA6/KCNQ1/DNAAF11/PARVB/CARMIL1/CFAP221/AIF1/ALPK1/ONECUT1/CFAP43/WDPCP/SPATA13/MAP4/DCDC2/TTC36/CEP70/MYLK/TBC1D32/DNAAF4/OPHN1/SDCCAG8/SRGAP2/ANO6/ARHGEF26/ARMC2/ARHGAP44/MYO10/CC2D2A/DISC1/TTBK2/SNX10/PLD1/CFAP44/ABLIM1/HTT/RFX2/SEPTIN9/RAPGEF6/FGD4/SPATA13/NCK2/TTLL1/CDKL5/DNAH1/A…	138
GO:0030048	actin filament-based movement	39/2706	95/12386	1.85704e+09	0.00178873	0.001553	KCND3/KCNJ3/CACNA1D/FGF13/CACNB2/ANK2/GATA4/CAMK2D/CTNNA3/MYO5B/MYO1D/RYR2/KCNQ1/WIPF3/GPD1L/SCN5A/CCDC88C/SYNE2/MYO15A/NEDD4L/NOS1AP/BIN1/MYO9B/MYH10/KCNH2/MYH14/MYO5C/LIMCH1/AKAP9/MYO1E/MYO1B/DLG1/MYO1A/WIPF1/MYO7B/SNTA1/MYO6/CACNA1G/ATP1A1	39
GO:0030073	insulin secretion	51/2706	145/12386	0.000151285	0.00716148	0.00621771	KCNB1/ADCY5/PRKN/ABAT/VSNL1/EIPR1/RFX3/PRKCE/STXBP4/BMP8A/TIAM1/UCN3/GPLD1/JAK2/BRSK2/LRP5/ANO1/NDUFAF2/ACVR1C/HADH/PPP3CA/PLA2G6/ILDR2/MCU/PTPRN2/KLF7/DRD2/AACS/ICA1/PCLO/TCF7L2/LRP1/ARNTL/NR0B2/HMGN3/CFTR/CLOCK/HNF1B/ACSL4/FAM3B/SYT7/SLC9B2/HNF1A/CPT1A/MPC2/PFKL/NR1H4/PCK2/HNF4A/RAB11FIP5/PPARD	51
GO:0030111	regulation of Wnt signaling pathway	79/2706	264/12386	0.00120512	0.0279971	0.0243075	CDK14/PRKN/EDA/SEMA5A/TRABD2B/GPC5/SULF1/BICC1/AMER3/NPHP4/KLF15/BTRC/TMEM131L/TIAM1/WNK2/FAM53B/CCNY/TLR2/LYPD6/DCDC2/UBAC2/MLLT3/SOSTDC1/FGFR2/CCDC88C/NXN/EGF/GNAQ/EGFR/DISC1/PTPRU/TBL1X/CTNNBIP1/INVS/LRRK1/ALPK2/TCF7L2/TLE1/STK3/LRP1/WNT5B/SULF2/NKD1/SRC/ARNTL/KANK1/TSKU/LRP4/TMEM170B/VGLL4/GSK3B/RNF213/USP34/DEPDC1B/TCF7L1/GPRC5B/PLPP3/IFT80/CSNK1G1/ADGRA2/AXIN1/CXXC4/SLC9A3R1/SOX13/WWOX/TBL1…	79
GO:0030201	heparan sulfate proteoglycan metabolic process	13/2706	26/12386	0.00143384	0.0304879	0.0264701	NDST4/XYLT1/SULF1/EXT1/HS2ST1/EXT2/TCF7L2/PXYLP1/NDST1/SULF2/HS6ST2/GLCE/HS6ST1	13
GO:0030210	heparin biosynthetic process	7/2706	10/12386	0.00150546	0.0312325	0.0271166	NDST4/ANGPT1/SLC10A7/EXT1/EXT2/NDST1/GLCE	7
GO:0030318	melanocyte differentiation	11/2706	17/12386	0.000174429	0.00789251	0.0068524	LRMDA/OCA2/USP13/MITF/BCL2/ENPP1/GNA11/MREG/RAB27A/EDNRB/MEF2C	11
GO:0031589	cell-substrate adhesion	89/2706	282/12386	8.27715e+09	0.00490626	0.00425969	EDA/COL26A1/PKHD1/BCAS3/ANGPT1/PREX1/PTPRK/PTPRJ/CASK/FBLN5/DOCK1/FER/PRKCE/RSU1/ADAMTS9/SORBS1/ITGB6/PARVB/CARMIL1/TIAM1/GAS6/ONECUT1/JAK2/UTRN/WDPCP/ECM2/BCR/MEGF9/NTN4/PTPRA/CLASP1/ITGB5/SRGAP2/ATRN/PTK2/TBCD/TMEM8B/DISC1/PRKCZ/NID1/TESK2/VWF/COL17A1/PIK3CB/PRKX/SKAP1/PHLDB2/SRCIN1/ITGA1/LRP1/NID2/SRC/LIMS1/CD96/KANK1/BCL2/ARHGEF7/LIMCH1/ACTN1/GSK3B/GCNT2/COL13A1/NPNT/CCL28/TECTA/MERTK/MELTF/N…	89
GO:0031667	response to nutrient levels	110/2706	379/12386	0.000533967	0.0159636	0.0138599	PRKD1/GHR/KCNB1/MGMT/OTC/PHEX/KYNU/BCAS3/MAP3K5/TBC1D5/GATA4/BCKDHB/SLC10A1/RPTOR/ARSB/ABCA1/CLEC16A/ASS1/NCOA1/PEMT/ATG7/BMP8A/G6PC1/ACACB/TMEM135/CYP8B1/CYTB/UCN3/GAS6/SORL1/SSTR3/BRSK2/PCK1/SLC8A1/HLCS/NIM1K/PKLR/BMPR2/CPS1/XPR1/ACVR1C/VDR/ALB/RRAGD/CYBB/DAP/EGFR/PFKFB1/ACSL1/UCP3/VPS41/AACS/F7/DEPDC5/NNT/TRPV1/SESN3/PCSK9/SLC6A19/SRC/CAT/BCL2/SLC6A4/AQP3/BMT2/SLC38A3/CCL28/ACSL4/TTPA/SORD/HFE…	110
GO:0032409	regulation of transporter activity	62/2706	199/12386	0.00133069	0.029577	0.0256792	AKAP6/CACNA1D/FGF13/CACNB2/ANK2/SLC5A11/WWP2/CAMK2D/SLC6A9/JPH2/PRKCE/RYR2/EPHB2/STIM1/RXRA/KCNQ1/WNK2/ANK3/UTRN/GPD1L/PLA2G6/KCNIP2/PLCG2/DRD2/STK39/HTT/CACNG4/PCSK9/NEDD4L/NOS1AP/SHANK3/CRACR2A/NEDD4/TRPC6/CNIH3/RGN/BCL2/JPH3/CFTR/AKAP9/GLRX/SLC9A3R1/SPHK2/SLC5A3/DLG1/DMD/CHRM3/THADA/PPARG/GSTO1/STIM2/STAC3/PDZK1/ACE2/GNB5/MEF2C/ATP1B1/AMIGO1/HECW2/TCAF2/ATP7A/EPO	62
GO:0032411	positive regulation of transporter activity	31/2706	87/12386	0.00221018	0.0384548	0.0333871	AKAP6/CACNB2/ANK2/SLC6A9/JPH2/RYR2/EPHB2/STIM1/RXRA/WNK2/ANK3/KCNIP2/PLCG2/STK39/HTT/CACNG4/NOS1AP/SHANK3/CRACR2A/TRPC6/RGN/CFTR/AKAP9/GLRX/DMD/GSTO1/STIM2/STAC3/PDZK1/ATP1B1/AMIGO1	31
GO:0032787	monocarboxylic acid metabolic process	158/2706	466/12386	69499.1	1.87439e+08	1.62738e+07	HAO2/HDAC4/OSBPL6/KYNU/GLYAT/PLA2G4A/ACSM2A/ABAT/PCCA/TECRL/ADTRP/MALRD1/FBP1/ASAH2/AIG1/ALOX5AP/PRKCE/ACSM2B/HOGA1/GSTA1/ACACB/FAAH2/CYP8B1/PTGIS/PC/MCCC1/PCK1/CRYL1/ACOT7/INSR/PDK3/HLCS/PKLR/CYP2C19/CYP2E1/SLC27A2/ELOVL7/HADH/ALDOB/AKR1D1/PAM/GSTM4/DGAT2/XYLB/ACACA/PFKFB1/ACSL1/ACAD11/UCP3/CYP4B1/ELOVL6/PGM1/SLC25A12/AACS/CYP7A1/HAL/BDH2/AOAH/AGXT2/CYP4F3/PHGDH/VNN2/PCCB/ACOX3/SCD5/SULT2A1/UGT2…	158
GO:0032868	response to insulin	75/2706	217/12386	9.91433e+07	0.0011884	0.00103179	GHR/OTC/PID1/IGF1R/PRKCQ/FER/KLF15/SORBS1/STXBP4/G6PC1/KCNQ1/TNFSF10/KAT2B/PDE3B/SORL1/GPLD1/PCK1/INSR/TLR2/PKLR/KHK/ACVR1C/HADH/PTPRA/PTPRE/RPE65/GCNT1/C2CD5/PFKFB1/EEF2K/GKAP1/PRKCZ/UCP3/SORT1/GRB14/SESN3/PCSK9/SOGA1/SRC/KANK1/CAT/INSIG1/ENPP1/LYN/GSK3B/PAK1/SLC27A1/APOBEC1/WDTC1/AHSG/LPIN1/AP3S1/INSIG2/PIP4K2A/PPARG/GRB10/TRIB3/OSBPL8/GAB1/SMARCC1/CPEB2/SLC39A14/PCK2/UPRT/SIK2/IGF2/AGT/FOXO4/C…	75
GO:0032870	cellular response to hormone stimulus	133/2706	453/12386	8.38398e+09	0.00491556	0.00426777	ESRRG/NR3C2/GHR/SMYD3/HDAC4/PHEX/TNFSF4/AR/BCAS3/THRB/ADTRP/PID1/IGF1R/PRKCQ/ASS1/NCOA1/KDM4C/FER/PRKCE/ND3/SORBS1/STXBP4/G6PC1/UMODL1/RXRA/AIF1/KAT2B/PRLR/NCOR2/PDE3B/UCN3/SORL1/GPLD1/SSTR3/JAK2/GNRHR2/PCK1/INSR/NCOA2/PKLR/ZMIZ1/HMGA2/CPS1/SLC30A10/PTPRA/DNAAF4/PTPRE/RPE65/C2CD5/EGFR/PTK2/ACACA/EEF2K/ACSL1/GKAP1/LEPR/PRKCZ/UCP3/PIAS2/MBD5/WT1/GRB14/SESN3/PCSK9/SOGA1/LANCL2/NEDD4/SRC/AKR1C2/ARNTL…	133
GO:0033865	nucleoside bisphosphate metabolic process	44/2706	112/12386	2.09727e+09	0.00187759	0.00163015	KYNU/GLYAT/ACSM2A/SULT1B1/SULT1E1/ACSM2B/SLC26A1/FAR2/ACACB/PANK1/ACOT7/PDK3/ELOVL7/TPST1/DGAT2/ACACA/SUCLG2/ACSL1/TPST2/ELOVL6/PIPOX/SULT2A1/PAPSS2/PDK1/SLC26A2/HMGCS2/ENPP1/CROT/PAPSS1/ACOT4/ACSM3/ACSM1/ACSL4/ACAT1/ACSF3/ACSF2/MPC2/HACD2/ELOVL5/ACSS1/OGDH/HSD17B12/FITM2/PDK2	44
GO:0033875	ribonucleoside bisphosphate metabolic process	44/2706	112/12386	2.09727e+09	0.00187759	0.00163015	KYNU/GLYAT/ACSM2A/SULT1B1/SULT1E1/ACSM2B/SLC26A1/FAR2/ACACB/PANK1/ACOT7/PDK3/ELOVL7/TPST1/DGAT2/ACACA/SUCLG2/ACSL1/TPST2/ELOVL6/PIPOX/SULT2A1/PAPSS2/PDK1/SLC26A2/HMGCS2/ENPP1/CROT/PAPSS1/ACOT4/ACSM3/ACSM1/ACSL4/ACAT1/ACSF3/ACSF2/MPC2/HACD2/ELOVL5/ACSS1/OGDH/HSD17B12/FITM2/PDK2	44
GO:0034032	purine nucleoside bisphosphate metabolic process	44/2706	112/12386	2.09727e+09	0.00187759	0.00163015	KYNU/GLYAT/ACSM2A/SULT1B1/SULT1E1/ACSM2B/SLC26A1/FAR2/ACACB/PANK1/ACOT7/PDK3/ELOVL7/TPST1/DGAT2/ACACA/SUCLG2/ACSL1/TPST2/ELOVL6/PIPOX/SULT2A1/PAPSS2/PDK1/SLC26A2/HMGCS2/ENPP1/CROT/PAPSS1/ACOT4/ACSM3/ACSM1/ACSL4/ACAT1/ACSF3/ACSF2/MPC2/HACD2/ELOVL5/ACSS1/OGDH/HSD17B12/FITM2/PDK2	44
GO:0034330	cell junction organization	152/2706	486/12386	5.34786e+07	0.000206045	0.000178892	GPC6/CDH6/ADGRL3/EPB41L3/LRRTM4/PRKCA/SHANK2/FGF13/CACNB2/ANK2/UNC13C/PDZRN3/PKHD1/BCAS3/GPHN/ERBB4/PPP1R9A/CHRNA7/ERC1/TANC1/PTPRK/IGF1R/COLQ/EXT1/PTPRJ/MPP7/PARD3/MPDZ/PTPRD/NPHP4/SIPA1L1/NDRG1/SORBS1/FARP1/EPHB2/NRCAM/MTSS1/UNC13B/NGEF/PKP4/CHRNA1/SPARCL1/TIAM1/CLDN16/ANK3/WDPCP/MAPRE2/SEMA4D/INSR/TLR2/BCR/IQSEC1/GRIN2B/MYO9A/CX3CR1/ADGRF1/PTPRA/CLASP1/OPHN1/GABRA2/ARHGAP39/COL4A5/PTK2/TBCD/EE…	152
GO:0034329	cell junction assembly	88/2706	287/12386	0.000273417	0.0109997	0.00955013	GPC6/CDH6/ADGRL3/EPB41L3/PRKCA/SHANK2/FGF13/ANK2/BCAS3/ERBB4/PPP1R9A/PTPRK/COLQ/PTPRJ/MPP7/PARD3/MPDZ/PTPRD/NPHP4/SORBS1/FARP1/EPHB2/NRCAM/PKP4/CLDN16/WDPCP/SEMA4D/TLR2/BCR/MYO9A/ADGRF1/PTPRA/CLASP1/OPHN1/GABRA2/PTK2/TBCD/EEF2K/PRKCH/HEG1/DRD2/TESK2/CDHR3/COL17A1/SDK1/CLDN19/PCLO/CNTNAP2/PHLDB2/SHANK3/RAPGEF1/PATJ/LRP1/CDH10/SRC/LIMS1/LRP4/TLN2/BCL2/ARHGEF7/LIMCH1/ACTN1/RAB29/GJB1/PIP5K1C/DLG5/DL…	88
GO:0034765	regulation of ion transmembrane transport	91/2706	293/12386	0.000131812	0.00670749	0.00582355	PRKD1/KCND3/KCNB1/KCNJ3/AKAP6/CACNA1D/FGF13/CACNB2/ANK2/WWP2/SCN9A/COMMD1/KCNMA1/SCN8A/CAMK2D/SLC6A9/JPH2/PRKCE/RYR2/EPHB2/STIM1/KCNQ1/WNK2/ANK3/UTRN/SLC8A1/GPD1L/SCN5A/PLA2G6/CYBB/KCNIP2/ANO6/PLCG2/KCNAB2/DRD2/STK39/HTT/CACNG4/PCSK9/NEDD4L/NOS1AP/SHANK3/BIN1/XCL1/CRACR2A/NEDD4/TRPC6/CNIH3/RGN/ATP2B4/SLC43A2/KCNH2/JPH3/KCNJ16/LYN/CFTR/AKAP9/GLRX/CALCR/TMEM37/SLC9A3R1/SLC43A1/KCNK10/SPHK2/FYN/DLG1…	91
GO:0035265	organ growth	43/2706	118/12386	0.000199123	0.00866184	0.00752035	AKAP6/SORBS2/AR/GATA4/ERBB4/EXT1/TGFBR3/ACACB/TP73/DDR2/COL27A1/FGFR2/JARID2/ANXA6/BMPR1A/SMPD3/LEPR/HEG1/WT1/STK3/TSKU/BCL2/VGLL4/SLC6A4/PLAG1/IFT80/SMO/WWC1/PAK1/RARB/AKAP13/WWC2/IER3IP1/PDGFRB/GATA6/MEF2C/RBPJ/IGF2/AGT/ARID2/FLVCR1/MTOR/PPARA	43
GO:0035592	establishment of protein localization to extracellular region	81/2706	269/12386	0.00085978	0.0222964	0.0193581	KCNB1/ADCY5/PRKN/ABAT/VSNL1/ADTRP/ABCA1/SERGEF/EIPR1/RFX3/PRKCE/STXBP4/BMP8A/PCSK5/UNC13B/TTN/TANGO6/DNAJC1/TIAM1/UCN3/GPLD1/JAK2/BRSK2/LRP5/ANO1/TLR2/NDUFAF2/COPG2/ACVR1C/HADH/PPP3CA/PLA2G6/PAM/C1QTNF3/EGFR/ILDR2/MCU/PTPRN2/KLF7/DRD2/AACS/ICA1/PCLO/TCF7L2/RPH3AL/SRCIN1/RAB11FIP3/LRP1/MYOM1/GNPTAB/ARNTL/NR0B2/MYH10/HMGN3/CFTR/CLOCK/HNF1B/ACSL4/FAM3B/SYT7/MTTP/RAB3A/SLC9B2/HNF1A/CPT1A/AFM/MPC2/IER…	81
GO:0035725	sodium ion transmembrane transport	48/2706	115/12386	1.19864e+08	0.000304305	0.000264202	FGF13/SCN9A/COMMD1/SCN8A/CAMK2D/SLC6A9/PRKCE/KCNQ1/WNK2/ANK3/SLC4A8/UTRN/SLC8A1/SLC5A1/SLC9A2/GPD1L/SCN5A/SLC17A1/ANO6/SHROOM2/SLC28A3/SLC9A7/STK39/PCSK9/SLC34A3/NEDD4L/SLC6A19/SLC4A5/SLC9B1/NEDD4/ATP2B4/SLC6A4/GLRX/SLC9A3/SLC9A3R1/DLG1/DMD/SLC9B2/SLC6A6/SNTA1/SLC17A4/SLC23A1/SLC6A8/ATP1B1/CACNA1G/ATP1A1/HECW2/SLC34A1	48
GO:0040013	negative regulation of locomotion	72/2706	239/12386	0.00159345	0.0321913	0.027949	SEMA5B/SRGAP3/PTPRG/SEMA5A/PTPRM/RIN3/EVL/FRMD5/ADTRP/PTPRK/PLCB1/SULF1/MAP2K5/PTPRJ/ADAMTS9/AIF1/ROBO1/SEMA4D/CX3CR1/ACVR1C/CLASP1/MMP28/SRGAP2/BMPR1A/ADARB1/PTPRU/DRD2/SEMA6C/CLDN19/SRGAP2B/STARD13/PHLDB2/PTPRR/GNA12/LRP1/MITF/KANK1/RGN/ATP2B4/PFN2/BCL2/LIMCH1/SCAI/CCL28/DLG5/ARPIN/IL27RA/SLC9A3R1/NF1/ADORA3/ADGRG1/PPARG/ABHD2/SEMA3F/OSBPL8/DAB2IP/NF2/MEF2C/CLASP2/WNT11/FOXO3/CTNNA1/C5/ALOX15B/…	72
GO:0042044	fluid transport	12/2706	21/12386	0.000459014	0.0145643	0.0126449	AQP4/UPK3A/EXT1/ITPR1/SLC5A1/AQP10/EXT2/CFTR/AQP3/AQP1/AQP7/EDNRB	12
GO:0042391	regulation of membrane potential	90/2706	262/12386	1.79291e+07	0.00037196	0.000322942	GRIK4/KCND3/GRID1/KCNB1/KCNJ3/AKAP6/CACNA1D/PRKN/GRIK2/FGF13/CACNB2/ANK2/ABAT/PPP1R9A/CHRNA7/WWP2/SCN9A/PID1/KCNMA1/SCN8A/RIMS4/CAMK2D/CTNNA3/PIEZO2/CRTC1/RYR2/KCNQ1/UNC13B/CHRNA1/CHRNA2/UCN3/ANK3/SLC4A8/SLC8A1/GRIN2B/STOX1/GPD1L/SCN5A/PPP3CA/GNAQ/GABRA2/KCNIP2/KCNAB2/PRKCZ/DRD2/CLDN19/NNT/TRPV1/NEDD4L/CHRNB4/NOS1AP/SHANK3/BIN1/TMEM25/KCNMB4/MAPT/CHRNA4/NEDD4/SRC/CNIH3/GABRA4/KCNH2/BCL2/MYH14/GNA…	90
GO:0042403	thyroid hormone metabolic process	11/2706	18/12386	0.000359968	0.0127995	0.0111128	SULT1B1/SLC16A10/GCNT4/CPQ/TG/SULT2A1/CRYM/IYD/DUOX2/DIO1/HPN	11
GO:0042417	dopamine metabolic process	14/2706	24/12386	0.000112855	0.00602714	0.00523286	PRKN/MAOA/ABAT/MAOB/DDC/DRD2/DAO/NPR1/SLC1A1/ITGAM/COMT/ITGB2/PNKD/ATP7A	14
GO:0042476	odontogenesis	35/2706	92/12386	0.000295192	0.0112131	0.00973542	PHEX/EDA/STIM1/ITGB6/FAM20A/FAM20C/SCN5A/SOSTDC1/FGFR2/PAM/BMPR1A/SMPD3/SNX10/ANKRD11/SRC/LRP4/ODAM/CFTR/AQP3/SMO/JAG2/MMP20/ENAM/TSPEAR/AQP1/BCL11B/HTRA1/NF2/ATF2/CTNNA1/FOXO1/LAMB1/SDC1/PPARA/SLC34A1	35
GO:0042551	neuron maturation	16/2706	32/12386	0.00041257	0.013737	0.0119267	GLDN/NRCAM/NTN4/KCNIP2/LGI4/RB1/CNTNAP2/ANKS1A/BCL2/SPTBN4/SCLT1/AGRN/EDNRB/MAP3K13/MTOR/FARP2	16
GO:0042593	glucose homeostasis	58/2706	187/12386	0.00209422	0.0375289	0.0325832	KCNB1/ADCY5/ACSM2A/GATA4/VSNL1/IGF1R/PRKCE/KLF15/STXBP4/G6PC1/UNC13B/TIAM1/GAS6/GPLD1/BRSK2/LRP5/ADGRF5/PCK1/ANO1/INSR/PDK3/NDUFAF2/PPP3CA/PLA2G6/MCU/PTPRN2/LEPR/KLF7/HECTD4/AACS/CYP7A1/MBD5/SESN3/TCF7L2/LRP1/HMGN3/CFTR/WDR35/LRRC8D/FAM3B/MLXIPL/SLC9B2/HNF1A/FOXK1/PPARG/MPC2/WFS1/NR1H4/PTCH1/SLC39A14/PCK2/FOXO3/HNF4A/PIK3R1/FOXO1/RAB11FIP5/PPARD/PDK2	58
GO:0042632	cholesterol homeostasis	28/2706	66/12386	0.000138092	0.00680863	0.00591136	GRAMD1B/ABCA1/MALRD1/G6PC1/MALL/LRP5/SCARB1/DGAT2/CYP7A1/PCSK9/SOAT2/TSKU/EPHX2/INSIG1/TTC39B/LIPC/APOB/TMEM97/ACSM3/ACSM1/AKR1C1/MTTP/ABCA5/LIMA1/HNF4A/NR5A2/APOC3/PLA2G12B	28
GO:0042886	amide transport	75/2706	224/12386	3.45092e+09	0.00258531	0.00224461	KCNB1/ADCY5/PRKN/ABCC4/ABAT/SLC47A1/VSNL1/SLC16A10/UPK3A/ABCA1/EIPR1/RFX3/PRKCE/STXBP4/BMP8A/SLC14A2/TIAM1/UCN3/GPLD1/JAK2/BRSK2/LRP5/SLC15A1/ANO1/NDUFAF2/AQP10/ACVR1C/HADH/PPP3CA/PLA2G6/EGFR/ILDR2/MCU/SMPD3/PTPRN2/KLF7/DRD2/AACS/ICA1/TRPV1/PCLO/SLC38A5/TCF7L2/LRP1/SLC19A1/ARNTL/NR0B2/HMGN3/CFTR/AQP3/CLOCK/ABCC1/HNF1B/SLC27A1/ACSL4/FAM3B/SYT7/SLC9A3R1/HFE/LRP2/MTTP/SLC9B2/APLN/HNF1A/LTBP4/CPT1A/M…	75
GO:0043087	regulation of GTPase activity	97/2706	269/12386	5.25323e+06	3.14843e+09	2.73352e+09	PLXNC1/DENND1A/SBF2/TBC1D22A/BCAS3/TBC1D5/RASGRP1/PREX1/SIPA1L3/RALGAPA2/TBC1D1/RSU1/SIPA1L1/ARHGAP42/VAV2/RASAL2/TBC1D30/DENND1B/NGEF/PKP4/SGSM1/TIAM1/DOCK8/MAPRE2/SEMA4D/ABR/BCR/IQSEC1/EVI5/MYO9A/IQGAP2/SRGAP2/PTK2/ARHGEF26/ARHGAP44/PTPRN2/RABGAP1L/ARHGAP25/RASGRP3/RAPGEF6/FGD4/ASAP2/RALGAPA1/DOCK7/RAP1GDS1/CDKL5/RAPGEF1/ASAP1/XCL1/TBC1D16/ARFGEF1/NTF3/LIMS1/RASA4/RGN/CBLB/TIAM2/PLXNA2/ARHGEF7/…	97
GO:0043269	regulation of ion transport	133/2706	410/12386	2.98257e+07	0.000123754	0.000107445	PRKD1/KCND3/KCNB1/KCNJ3/AKAP6/CACNA1D/PRKN/FGF13/CACNB2/ANK2/SYT2/PLA2G4A/SLC10A1/ABAT/EPB41/WWP2/SCN9A/COMMD1/KCNMA1/CASK/SCN8A/CAMK2D/SLC6A9/JPH2/PRKCE/SYT11/RYR2/EPHB2/STIM1/KCNQ1/MAOB/WNK2/ANK3/UTRN/SLC8A1/GPD1L/SCN5A/SLC30A10/MYLK/TRPC3/PLA2G6/EGF/DTNBP1/CYBB/KCNIP2/MAP2K6/ANO6/PLCG2/KCNAB2/SYT13/DRD2/STK39/CNKSR3/HTT/SYT1/CACNG4/NKAIN3/PCSK9/NEDD4L/NOS1AP/SHANK3/SYT17/BIN1/XCL1/CRACR2A/CHRN…	133
GO:0043547	positive regulation of GTPase activity	72/2706	193/12386	6.22645e+07	0.000223903	0.000194396	DENND1A/TBC1D22A/BCAS3/TBC1D5/RASGRP1/PREX1/SIPA1L3/RALGAPA2/TBC1D1/RSU1/SIPA1L1/ARHGAP42/TBC1D30/DENND1B/NGEF/PKP4/SGSM1/TIAM1/DOCK8/MAPRE2/SEMA4D/ABR/BCR/IQSEC1/EVI5/MYO9A/SRGAP2/ARHGEF26/RABGAP1L/ARHGAP25/RAPGEF6/ASAP2/RALGAPA1/DOCK7/RAP1GDS1/CDKL5/RAPGEF1/ASAP1/XCL1/TBC1D16/NTF3/LIMS1/RGN/TIAM2/ARHGEF7/GSK3B/ODAM/TBCK/RAP1GAP2/TBC1D12/EVI5L/RAP1GAP/DOCK11/NEDD9/NF1/CCL15/TGM2/TBC1D2B/TBC1D2/R…	72
GO:0044057	regulation of system process	106/2706	344/12386	5.47874e+09	0.00375306	0.00325847	KCND3/KCNJ3/AKAP6/CACNA1D/PRKCA/HDAC4/RNLS/FGF13/CACNB2/ANK2/FTO/PLCE1/GATA4/ABAT/CHRNA7/THRB/EPB41/BEGAIN/KCNMA1/PARD3/CAMK2D/CTNNA3/ARHGAP42/RYR2/CYP8B1/KCNQ1/UNC13B/AIF1/GAS6/JAK2/PPP1R12B/SLC8A1/GTF2IRD1/NCMAP/GPD1L/ECE1/BMPR2/SCN5A/JARID2/ANXA6/PPP3CA/TRPC3/MYL3/KCNIP2/EGFR/PRKCZ/DRD2/STK39/SLC25A12/CACNG4/ENPP7/CELF2/FIG4/TRPV1/ABCC9/NOS1AP/SHANK3/BIN1/TMEM25/KCNMB4/ZFHX2/NPR1/SRC/DOCK4/ATP…	106
GO:0044262	cellular carbohydrate metabolic process	79/2706	232/12386	1.08503e+09	0.00123932	0.001076	INPP4B/FGGY/PRKN/HDAC4/MOGAT2/NDST4/PLA2G4A/INPP5A/GBA3/EXT1/FBP1/CD244/PRKCE/ITPK1/GBE1/SORBS1/G6PC1/ACACB/KAT2B/GPLD1/PCK1/INSR/PDK3/NCOA2/KHK/HS2ST1/C1QTNF3/RBKS/PHKB/DGAT2/XYLB/PFKFB1/LEPR/GYG2/SLC25A12/EXT2/AOAH/SOGA1/PHKA2/PTH1R/NDST1/PHKA1/GALK2/MGAM/GNPTAB/TREH/SRC/RGN/PPP1R3E/PDK1/B3GNT7/ENPP1/GSK3B/IDH1/GK/ITPKA/SORD/TKFC/SLC5A3/TFF3/LCMT1/SYNJ2/FOXK1/PFKFB4/SDHAF3/GYG1/SLC45A3/GNB3/PCK…	79
GO:0044282	small molecule catabolic process	119/2706	315/12386	5769.29	3.11196e+07	2.70185e+07	INPP4B/DPYD/SARDH/OTC/KYNU/INPP5A/BCKDHB/ABAT/PCCA/ALDH1L1/SULT1B1/ALDH6A1/ADTRP/SULT1E1/PAH/SLC25A21/XDH/AIG1/HOGA1/ACACB/MAT1A/FUT8/OXCT2/LRP5/MCCC1/GALM/PCK1/DDAH1/SLC27A2/HADH/AKR1D1/RBKS/SCARB1/XYLB/FUT10/GLS2/ALDH3B1/ACAD11/APOBEC2/TDH/SLC25A12/CYP7A1/SHMT1/HAL/BDH2/AGXT2/CYP4F3/HIBCH/GPT2/PIPOX/PCCB/ACOX3/ASPA/DAO/SULT2A1/LONP2/CYP2W1/CDA/NUDT3/CYP3A4/HYKK/CRYM/CYP27A1/ATP2B4/QDPR/UPB1/GLD…	119
GO:0044283	small molecule biosynthetic process	129/2706	444/12386	0.00017558	0.00789251	0.0068524	DPYD/OSBPL6/OTC/KYNU/ADK/PLA2G4A/ACSM2A/TPK1/ABAT/TECRL/MALRD1/PAH/PDSS2/ASS1/FBP1/SPTLC3/ASAH2/ALOX5AP/CD244/PRTFDC1/ACSM2B/HOGA1/G6PC1/ACACB/CYP8B1/KAT2B/ITPKB/PTGIS/PC/PCK1/ACOT7/PKLR/CPS1/CYP2E1/SLC27A2/ELOVL7/AKR1D1/GSTM4/C1QTNF3/DGAT2/ACACA/PFKFB1/GLS2/PLCG2/LEPR/ACER3/ELOVL6/PGM1/SLC25A12/AACS/CYP7A1/SHMT1/ACSS3/AGXT2/PHGDH/SOGA1/PTH1R/SCD5/ALDH18A1/GPD1/CYP3A4/GATM/PECR/CYP27A1/RGN/ATP2B4…	129
GO:0044782	cilium organization	89/2706	293/12386	0.0003584	0.0127995	0.0111128	PKHD1/ABCC4/DYNC2H1/BBS9/RFX3/IFT140/TBC1D30/DNAH8/SPATA6/KCNQ1/DNAAF11/CFAP221/ALPK1/ONECUT1/CFAP43/WDPCP/MAP4/DCDC2/TTC36/CEP70/TBC1D32/DNAAF4/SDCCAG8/ARMC2/CC2D2A/DISC1/TTBK2/SNX10/CFAP44/ABLIM1/HTT/RFX2/SEPTIN9/TTLL1/CDKL5/DNAH1/ASAP1/ARHGAP35/ATXN10/TRAF3IP1/IFT81/IQUB/WDR19/RTTN/CDC14B/CFAP65/IFT122/IFT80/WDR35/PIFO/CDC14A/EVI5L/IFT43/CCDC65/POC1B/SLC9A3R1/RSPH1/TCTN3/DNAL1/TMEM231/SEPTIN6/…	89
GO:0045229	external encapsulating structure organization	64/2706	205/12386	0.00106073	0.0256573	0.0222761	ADTRP/COLQ/SULF1/EXT1/FBLN5/ST7/SH3PXD2B/ADAMTS9/ADAMTS15/PAPLN/GAS6/DDR2/LOX/ECM2/IBSP/COL27A1/NTN4/CLASP1/MMP28/COL4A5/COL5A2/SMPD3/COL12A1/NID1/COL17A1/TMPRSS6/WT1/SPINK5/RB1/COLGALT2/TLL2/SCX/PHLDB2/LRP1/NID2/SULF2/COL13A1/NPNT/COL4A1/MYO1E/COL18A1/MMP20/ADAMTS17/MELTF/CRTAP/NF1/SMAD3/IER3IP1/SERPINF2/TGM1/COL16A1/CLASP2/LCP1/GAS2/AGT/TNXB/HSD17B12/SERAC1/COL2A1/B4GALT1/NDNF/ATP7A/LAMB1/HPN	64
GO:0046394	carboxylic acid biosynthetic process	82/2706	245/12386	1.54284e+09	0.001578	0.00137005	DPYD/OSBPL6/OTC/KYNU/PLA2G4A/ACSM2A/ABAT/TECRL/MALRD1/PAH/ASS1/ASAH2/ALOX5AP/ACSM2B/HOGA1/ACACB/CYP8B1/PTGIS/ACOT7/PKLR/CPS1/CYP2E1/SLC27A2/ELOVL7/AKR1D1/GSTM4/ACACA/GLS2/ELOVL6/SLC25A12/CYP7A1/SHMT1/AGXT2/PHGDH/SCD5/ALDH18A1/CYP3A4/GATM/PECR/CYP27A1/RGN/ATP2B4/UPB1/INSIG1/LIPC/ACOT4/ACSM3/GSTM1/NAGS/ACSM1/CYP2C8/PSAT1/WDTC1/CBR1/OSBPL3/ACSF3/INSIG2/MLXIPL/MGST3/PIBF1/SCD/ABHD2/OSBPL1A/ALDH1A1/TR…	82
GO:0046395	carboxylic acid catabolic process	79/2706	204/12386	2.79927e+06	1.88741e+09	1.63868e+09	SARDH/OTC/KYNU/BCKDHB/ABAT/PCCA/ALDH1L1/ALDH6A1/ADTRP/PAH/SLC25A21/AIG1/HOGA1/ACACB/MAT1A/MCCC1/PCK1/DDAH1/SLC27A2/HADH/AKR1D1/XYLB/GLS2/ACAD11/TDH/SHMT1/HAL/BDH2/AGXT2/CYP4F3/HIBCH/GPT2/PIPOX/PCCB/ACOX3/ASPA/DAO/SULT2A1/LONP2/CYP2W1/HYKK/CRYM/ATP2B4/QDPR/GLDC/ACAD10/ACADSB/CROT/ACAT2/TAT/ACOT4/AUH/QPRT/ACOX2/ACAT1/LPIN1/ACSF3/ARG1/ALDH5A1/CPT1A/ABHD2/PRODH/GSTZ1/PCK2/KYAT3/ABHD1/AKR1A1/CRAT/BLMH…	79
GO:0046434	organophosphate catabolic process	44/2706	133/12386	0.00175311	0.0339162	0.0294466	INPP4B/DPYD/FHIT/PLA2G4A/INPP5A/ENTPD1/XDH/PLA2G4E/ACOT7/ENPP3/GPD1L/PNPLA7/PLA2G6/SCARB1/PDE10A/SMPD3/PLCG2/ENPP7/AMPD3/PDE8A/GPD1/NUDT3/UPB1/ENPP1/LIPC/IDH1/PRDX6/SAMHD1/ACAT1/ABHD12/PDE5A/SYNJ2/PDE4A/DERA/OGG1/FITM2/NUDT13/ADA/ENTPD6/NAPEPLD/MTMR2/ENTPD5/IMPA2/BPNT2	44
GO:0046486	glycerolipid metabolic process	106/2706	330/12386	7.71799e+08	0.000961133	0.000834471	INPP4B/AGMO/MOGAT2/PLA2G4A/INPP5A/PLCE1/PCYT1B/PLCB1/PITPNM2/PEMT/PIP5K1B/G6PC1/EFR3B/ABCA3/ITPKB/SORL1/GPLD1/PLA2G4E/LMF1/VAC14/PCK1/PNPLA7/CPS1/TTC7A/CYP2E1/PGAP4/PIGU/PLA2G6/PITPNM3/AGPAT3/MBOAT1/SCARB1/DGAT2/ACSL1/PLCG2/LCLAT1/PLD1/OSBPL10/AGPAT4/PIK3CB/PTDSS1/FIG4/TTC7B/SLC44A1/PCSK9/PIGB/SLC44A5/SLC22A4/GPD1/CDS1/CAT/PI4KA/RGN/PGAP2/LIPE/ACP6/INSIG1/INPP4A/LIPC/APOB/GK/PIGN/DGKH/PIP5K1C/PRD…	106
GO:0046928	regulation of neurotransmitter secretion	23/2706	58/12386	0.00161685	0.0324212	0.0281486	PRKN/CACNB2/ADCY1/PPP1R9A/CASK/RIMS4/MCTP2/SYT11/SLC4A8/RHOT1/DTNBP1/DRD2/SYT1/CHRNB4/NCS1/KCNMB4/GSK3B/RIMS3/RAB3A/BACE1/MEF2C/PNKD/FBXL20	23
GO:0046942	carboxylic acid transport	69/2706	184/12386	8.49968e+07	0.000254637	0.00022108	ABCC4/PLA2G4A/SLC10A1/ABAT/SLC47A1/SLCO1A2/SLC10A7/SLC25A21/SLC6A9/SLC26A1/SFXN5/SLC10A2/SLC5A12/SLC23A2/SLC36A2/PLA2G6/SLC38A6/MAP2K6/SLC17A1/SLC36A1/SFXN2/SLC17A5/DRD2/SLC25A12/CYP7A1/TRPV1/SLC38A5/SLC19A1/SLC7A7/SLC13A2/ABCC11/NR0B2/SLC26A2/SLC43A2/SLC11A1/SLC1A1/ABCC2/ABCC1/SLC38A3/SLC27A1/LRRC8D/PLA2R1/SLC9A3R1/SLC43A1/SLC13A5/SLCO2A1/AKR1C1/SLC7A1/LRP2/SLC25A13/ATP8B1/ABCC6/SLC3A1/ARG1/SLC1…	69
GO:0048639	positive regulation of developmental growth	43/2706	115/12386	0.000101592	0.00564937	0.00490488	GHR/AKAP6/PRKN/CDH4/SEMA5A/SYT2/ERBB4/PLCB1/TGFBR3/ACACB/RNF157/SEMA4D/SLC23A2/INSR/BMPR2/FGFR2/BMPR1A/DISC1/DRD2/SYT1/WT1/NEDD4L/CDKL5/SYT17/LRP1/MAPT/BCL2/PLS1/SMO/PAK1/RUFY3/CAPN3/SPTBN4/AGRN/GATA6/MEF2C/RBPJ/GOLGA4/IGF2/FN1/MAP3K13/MTOR/PPARD	43
GO:0048812	neuron projection morphogenesis	134/2706	432/12386	4.0782e+08	0.000564047	0.000489714	CNTN4/DAB1/PLXNC1/EPB41L3/PRKN/CDH4/CRPPA/TNIK/FGF13/ADCY1/SEMA5B/SEMA5A/SYT2/PTPRM/ATL1/DSCAML1/VSTM2L/PPP1R9A/CHRNA7/CYFIP2/MAP6/NEO1/PRKCQ/EXT1/EPHA6/PARD3/SDC2/ALCAM/PTPRD/SLC11A2/SIPA1L1/COBL/FARP1/TRIO/LZTS1/EPHB2/NRCAM/NGEF/NRXN3/TIAM1/CUX1/ROBO1/ANK3/NRN1/BRSK2/RNF157/SEMA4D/SLC23A2/DCDC2/MYO9A/BMPR2/FGFR2/RPS6KA5/PPP3CA/OPHN1/DTNBP1/SRGAP2/EGFR/PTK2/ADARB1/EEF2K/ARHGAP44/DISC1/PRKCZ/KLF7…	134
GO:0048871	multicellular organismal homeostasis	110/2706	363/12386	8.57568e+09	0.00497389	0.00431842	ESRRG/PTH2R/AQP4/PRDM16/PRKCA/BTBD9/FTO/EBF2/ABAT/ANGPT1/CRACD/PROM1/IGF1R/KSR2/EXT1/CUBN/IL20RA/PEMT/NPHP4/SLC11A2/SLC28A2/CRTC1/MYO5B/BMP8A/ACACB/ITGB6/ABCA3/PRLR/MBP/JAK2/ADGRF5/PRH1/ZNF516/PDGFC/HADH/ALB/RPE65/ALMS1/PBLD/EGFR/ILDR2/MAP2K6/ACACA/ACSL1/LEPR/SLC40A1/SNX10/APBB2/LRRK1/DRD2/STK39/ELOVL6/EXT2/CDH23/TRPV1/DOCK7/RB1/SCX/EHMT1/PTH1R/G0S2/SRC/ARNTL/GATM/ADGRV1/TSKU/SLC11A1/THRA/BCL2/LI…	110
GO:0050804	modulation of chemical synaptic transmission	89/2706	276/12386	3.43266e+09	0.00258531	0.00224461	GRIK4/GRID1/KCNB1/CNTN4/PRKN/GRIK2/BTBD9/SHANK2/CACNB2/ADCY1/UNC13C/CPEB3/PPP1R9A/CHRNA7/SORCS2/ERC1/BEGAIN/PLCB1/CASK/RIMS4/PTPRD/MCTP2/PRKCE/RAB26/CRTC1/SIPA1L1/SYT11/LZTS1/PRKAR1B/EPHB2/JAK2/SLC4A8/AKAP7/ABR/BCR/GRIN2B/CX3CR1/PPP3CA/PTPRA/RHOT1/PLA2G6/OPHN1/DTNBP1/EGFR/ERC2/DISC1/PRKCZ/DRD2/SYT1/CACNG4/CHRNB4/IQSEC2/NCS1/SHANK3/TMEM25/KCNMB4/MAPT/SYNGR1/SRC/NTF3/USP46/JPH3/SLC6A4/GSK3B/SLC1A1/…	89
GO:0050892	intestinal absorption	17/2706	32/12386	0.000104171	0.00567576	0.00492779	MOGAT2/EPB41/CYP8B1/KCNQ1/FABP2/SLC5A1/VDR/SLC2A5/SCARB1/ENPP7/SOAT2/NPC1L1/PLS1/TJP2/ACO1/AKR1C1/LIMA1	17
GO:0050954	sensory perception of mechanical stimulus	37/2706	110/12386	0.00283694	0.0470845	0.0408795	CACNA1D/THRB/PIEZO2/KCNQ1/MBP/DCDC2/LRIG1/TBL1X/CDH23/TRPV1/MYO15A/ADGRV1/CRYM/PDZD7/MYH14/ROR1/CDC14A/TECTA/ESPN/SLC9A3R1/TSPEAR/LRP2/ATP8B1/FYN/RAB3A/SPTBN4/HOMER2/MYO1A/MYO7B/BACE1/TMEM120A/WFS1/MYO6/ALDH7A1/COL2A1/SLC52A3/HPN	37
GO:0051046	regulation of secretion	132/2706	432/12386	1.11268e+09	0.00123932	0.001076	KCNB1/ADCY5/PRKN/CACNB2/ADCY1/SYT2/PLA2G4A/SLC10A1/ABAT/PPP1R9A/VSNL1/ADTRP/ATP9A/SERGEF/EIPR1/CASK/RIMS4/RFX3/FER/MCTP2/PRKCE/STXBP6/RAB26/SCIN/STXBP4/BMP8A/SYT11/KCNQ1/UNC13B/TTN/MAOB/DNAJC1/TIAM1/UCN3/GPLD1/JAK2/SLC4A8/BRSK2/MYB/LRP5/ANO1/TLR2/NDUFAF2/ACVR1C/HADH/PPP3CA/RHOT1/CLASP1/PLA2G6/EGF/PAM/C1QTNF3/DTNBP1/EGFR/MAP2K6/MCU/SMPD3/SYT13/KLF7/DRD2/STK39/SYT1/AACS/ICA1/TRPV1/PCLO/TCF7L2/CHRNB…	132
GO:0051056	regulation of small GTPase mediated signal transduction	94/2706	253/12386	1.58648e+06	1.42625e+09	1.23829e+09	PSD3/RASGEF1A/DENND1A/SRGAP3/PLCE1/PSD2/RALGPS1/RASGRP1/CGNL1/PREX1/SIPA1L3/ARHGAP10/ABCA1/ARHGAP26/RALGAPA2/MCF2L/FBP1/SIPA1L1/ARHGAP42/TRIO/VAV2/EPHB2/NGEF/TIAM1/ITPKB/DOCK8/ROBO1/SPATA13/MAPRE2/ABR/MAPKAP1/BCR/IQSEC1/MYO9A/LPAR1/OPHN1/FAM13A/ARHGAP39/SRGAP2/ARHGAP44/HEG1/ARHGAP18/ARHGEF17/ARHGAP25/FGD4/PIK3CB/SPATA13/ARHGEF9/ARHGEF3/RALGAPA1/STARD13/ARHGEF10L/ARHGAP32/IQSEC2/RABL3/ARHGAP35/ARF…	94
GO:0051271	negative regulation of cellular component movement	70/2706	222/12386	0.000466472	0.0146288	0.0127009	SRGAP3/PTPRG/PKHD1/PTPRM/RIN3/EVL/FRMD5/ADTRP/PTPRK/PLCB1/SULF1/MAP2K5/PTPRJ/ADAMTS9/TGFBR3/AIF1/ROBO1/CX3CR1/ACVR1C/CLASP1/MMP28/SRGAP2/BMPR1A/ADARB1/PTPRU/DRD2/CLDN19/SRGAP2B/STARD13/PHLDB2/BIN1/PTPRR/GNA12/LRP1/MITF/KANK1/RGN/ATP2B4/PFN2/BCL2/LIMCH1/ACTN1/SCAI/CCL28/DLG5/ARPIN/IL27RA/SLC9A3R1/NF1/ADORA3/ADGRG1/PPARG/ABHD2/OSBPL8/DAB2IP/NF2/MEF2C/CLASP2/WNT11/FOXO3/CTNNA1/C5/ALOX15B/ZMYND8/ARID…	70
GO:0051592	response to calcium ion	45/2706	113/12386	1.12582e+09	0.00123932	0.001076	ADCY1/SYT2/KCNMA1/CAMK2D/ALOX5AP/SYT11/RYR2/STIM1/TTN/CYTB/ITPKB/GPLD1/CHP2/SCN5A/MNAT1/PPP3CA/TRPC3/KCNIP2/EGFR/EEF2K/PLCG2/CPNE8/SYT13/SYT1/SLC25A12/SYT17/KCNMB4/NEDD4/RASA4/ADGRV1/SLC25A23/RASA4B/CARF/AQP3/APOBEC1/SYT7/SLC25A13/MTTP/CAPN3/DMTN/MEF2C/AKR1C3/CPNE2/ENTPD6/SDC1	45
GO:0051606	detection of stimulus	43/2706	129/12386	0.0016649	0.0328352	0.028508	GRIK2/SEMA5B/CAMKMT/DMBT1/PTPRJ/PIEZO2/RYR2/STIM1/KCNQ1/TTN/OR4E1/GUCY2D/ANO1/TLR2/HMGA2/MRPS26/TRPC3/GNAQ/RPE65/SCARB1/KCNIP2/PTK2/GNGT1/SYT1/TRPV1/KCNMB4/PKD1L1/CDS1/ADGRV1/REEP6/PDZD7/GNA11/SMO/PAK1/TAS2R31/FYN/BACE1/TAS2R14/TMEM120A/CDHR2/TAS2R20/HPN/PIEZO1	43
GO:0060285	cilium-dependent cell motility	27/2706	73/12386	0.00224957	0.0386439	0.0335513	DNAH11/SLC22A16/DNAH6/RFX3/NPHP4/DNAH8/CELF3/DNAAF11/CFAP43/ARMC2/CFAP44/TTLL1/DNAH1/SLC9B1/RGN/ATP2B4/CFAP65/APOB/VPS13A/CCDC65/SORD/SLC9B2/ASH1L/SPEF2/ADCY3/DPCD/EFHC1	27
GO:0060348	bone development	52/2706	153/12386	0.000345138	0.0127995	0.0111128	GHR/PHEX/XYLT1/FOXN3/SLC10A7/DYM/SULF1/EXT1/SH3PXD2B/ITGB6/LOX/LRP5/SEMA4D/BMPR2/COL27A1/FGFR2/CHAD/ANXA6/PDGFC/ZFPM1/MAP2K6/SMPD3/SNX10/LRRK1/BBX/RFLNB/EXT2/SCX/ZBTB16/SULF2/SRC/TSKU/RGN/INSIG1/NOTCH2/IFT80/COL13A1/NSD2/RARB/TGM2/INSIG2/AKAP13/SLC9B2/PIP4K2A/GLG1/SKI/MEF2C/IFT172/COL2A1/FOXP1/DCHS1/BPNT2	52
GO:0060413	atrial septum morphogenesis	7/2706	10/12386	0.00150546	0.0312325	0.0271166	GATA4/BMPR2/ZFPM1/NOTCH2/NSD2/SMO/ACVR1	7
GO:0061448	connective tissue development	59/2706	184/12386	0.000790903	0.0210154	0.0182459	GHR/SOX5/SOX6/FTO/EBF2/SULF1/EXT1/SATB2/SH3PXD2B/SCIN/BMP8A/UMODL1/SORL1/LOX/GPLD1/LRP5/BMP8B/HMGA2/BMPR2/COL27A1/ANXA6/ZNF516/MAF/DGAT2/BMPR1A/CREB3L2/SMPD3/KLF7/CHI3L1/AACS/RFLNB/WT1/SCX/ZBTB16/PTH1R/WNT5B/SULF2/TSKU/THRA/IFT80/NFIB/ITGB8/ACAT1/RARB/SMAD3/GLG1/PDGFRB/MEF2C/WNT2B/ATF2/SLC39A14/WNT11/RUNX3/COL2A1/IL6R/ATP7A/TYMS/PPARD/BPNT2	59
GO:0070633	transepithelial transport	13/2706	27/12386	0.00221717	0.0384548	0.0333871	ITPR1/GPLD1/SLC23A2/SLC5A1/CLDN19/CFTR/SLC1A1/ABCC2/ABCC1/RHBG/AQP1/SLC23A1/EDNRB	13
GO:0071277	cellular response to calcium ion	26/2706	60/12386	0.000156059	0.00731987	0.00635523	ADCY1/SYT2/CAMK2D/ALOX5AP/SYT11/ITPKB/GPLD1/CHP2/SCN5A/EEF2K/PLCG2/CPNE8/SYT13/SYT1/SYT17/RASA4/ADGRV1/SLC25A23/RASA4B/CARF/SYT7/CAPN3/DMTN/MEF2C/AKR1C3/CPNE2	26
GO:0071466	cellular response to xenobiotic stimulus	46/2706	130/12386	0.000266448	0.0108881	0.00945318	FMO1/GLYAT/SLC10A1/SULT1B1/ABCA1/NCOA1/FBP1/ACSM2B/GSTA1/KCNQ1/GAS6/GPLD1/HMGA2/CYP2C19/CMBL/CYP2E1/GSTM4/DDC/EGFR/ACSL1/RB1/SULT2A1/CYP2W1/CYP3A4/CERS1/FMO5/GSTA2/QDPR/KCNH2/CYP2U1/ABCC2/GSTM1/ACSM1/FMO4/CYP2C8/CBR1/AKR1C1/GSTO1/PDE4A/NCEH1/MEF2C/CHEK2/HNF4A/CYP4F2/ACAA1/CRYZ	46
GO:0071692	protein localization to extracellular region	82/2706	271/12386	0.000681848	0.0190564	0.0165451	KCNB1/ADCY5/PRKN/ABAT/VSNL1/ADTRP/ABCA1/SERGEF/EIPR1/RFX3/PRKCE/STXBP4/BMP8A/PCSK5/UNC13B/TTN/TANGO6/DNAJC1/LTBP1/TIAM1/UCN3/GPLD1/JAK2/BRSK2/LRP5/ANO1/TLR2/NDUFAF2/COPG2/ACVR1C/HADH/PPP3CA/PLA2G6/PAM/C1QTNF3/EGFR/ILDR2/MCU/PTPRN2/KLF7/DRD2/AACS/ICA1/PCLO/TCF7L2/RPH3AL/SRCIN1/RAB11FIP3/LRP1/MYOM1/GNPTAB/ARNTL/NR0B2/MYH10/HMGN3/CFTR/CLOCK/HNF1B/ACSL4/FAM3B/SYT7/MTTP/RAB3A/SLC9B2/HNF1A/CPT1A/AFM/MP…	82
GO:0071805	potassium ion transmembrane transport	40/2706	107/12386	0.000175584	0.00789251	0.0068524	KCND3/KCNB1/KCNJ3/AKAP6/CACNA1D/ANK2/WWP2/KCNMA1/KCNQ1/SLC12A8/WNK2/ANK3/SLC9A2/KCNIP2/KCNT1/ANO6/KCNAB2/SLC9A7/STK39/ABCC9/NEDD4L/NOS1AP/BIN1/KCNMB4/NEDD4/KCNH2/KCNJ16/AKAP9/SLC9A3/KCNK10/KCNN1/AQP1/DLG1/KCNJ10/KCNH4/SLC12A6/ATP1B1/AMIGO1/ATP1A1/HPN	40
GO:0072001	renal system development	71/2706	233/12386	0.00122352	0.0280107	0.0243193	PKHD1/PLCE1/FRAS1/ANGPT1/ERBB4/UPK3A/DYNC2H1/PBX1/PROM1/SULF1/EXT1/BICC1/ASS1/KIF26B/KLF15/PCSK5/MTSS1/TP73/GCNT4/WDPCP/FGFR2/TBC1D32/GCNT1/CC2D2A/CTNNBIP1/NID1/PRKX/WT1/PCSK9/ZBTB16/NFIA/SULF2/TRAF3IP1/CAT/RGN/LRP4/BCL2/NOTCH2/SMO/NPNT/HNF1B/COL4A1/DLG5/MYO1E/BMPER/ACAT1/LRP2/NF1/RARB/DLG1/SMAD6/SMAD3/PDGFRB/WFS1/MEF2C/WNT2B/PTCH1/PYGO1/WNT11/DACT2/ANKS6/AGT/PTK7/IL6R/TRAF3IP2/ARL3/DCHS1/IFT88/S…	71
GO:0086005	ventricular cardiac muscle cell action potential	14/2706	25/12386	0.000205036	0.0088477	0.00768171	KCND3/KCNJ3/ANK2/CTNNA3/RYR2/KCNQ1/GPD1L/SCN5A/NEDD4L/NOS1AP/BIN1/KCNH2/DLG1/SNTA1	14
GO:0090407	organophosphate biosynthetic process	130/2706	469/12386	0.00132202	0.029577	0.0256792	INPP4B/ADCY5/ADCY1/KYNU/ADK/PLA2G4A/GPHN/TPK1/ADCY9/PCYT1B/PID1/PITPNM2/PEMT/CD244/SLC26A1/PIP5K1B/ACACB/EFR3B/ITPKB/ATP8/PTGIS/SGMS1/PANK1/GUCY2D/NME7/ADGRF5/VAC14/ATP6/ACOT7/PDK3/PKLR/NMNAT2/CPS1/TTC7A/CKB/PGAP4/PIGU/ELOVL7/PLA2G6/PITPNM3/AGPAT3/MBOAT1/XYLB/CTPS2/ACACA/ACSL1/PLCG2/LCLAT1/PLD1/AK9/ELOVL6/SLC25A12/AGPAT4/PIK3CB/MTCO2P12/PTDSS1/FIG4/TTC7B/SLC44A1/AMPD3/PIGB/SLC44A5/PTH1R/UCK2/NMNA…	130
GO:0097306	cellular response to alcohol	26/2706	69/12386	0.00198463	0.0365362	0.0317213	GRAMD1B/ADCY5/ADCY1/TNFSF4/ITPR2/SPIDR/ABCA1/PRKCE/GPLD1/SLC23A2/CYBB/ACACA/AACS/CYP7A1/LANCL2/AKR1C2/CFTR/SMO/SPHK2/GNB1/ADCY3/PTCH1/FOXO3/CTNNA1/AKR1C3/FDX1	26
GO:0098657	import into cell	52/2706	147/12386	0.000110808	0.005977	0.00518933	KCNJ3/PRKN/SLC47A1/SLC6A9/SLC11A2/KCNQ1/SLC12A8/WNK2/SLC15A1/SLC8A1/SLC5A1/SLC9A2/SLC27A2/SLC2A5/ACSL1/SLC36A1/SLC9A7/DRD2/TRPV1/ABCC9/SLC22A4/SLC19A1/ATP2B4/SLC43A2/KCNH2/KCNJ16/SLC6A4/SLC1A1/SLC27A1/SLC9A3/CALCR/SLC43A1/HFE/SLC7A1/LRP2/FYN/SLC5A3/DLG1/KCNJ10/NEURL1B/SLC6A6/ACE2/SLC12A6/SLC39A14/SLC22A3/SLC22A2/ATP1B1/AGT/ATP1A1/ITGB3/SLC34A1/SLC31A1	52
GO:0098659	inorganic cation import across plasma membrane	26/2706	58/12386	7.84504e+09	0.00472067	0.00409857	KCNJ3/SLC6A9/KCNQ1/SLC12A8/WNK2/SLC8A1/SLC5A1/SLC9A2/SLC9A7/TRPV1/ABCC9/ATP2B4/KCNH2/KCNJ16/SLC9A3/CALCR/HFE/FYN/DLG1/KCNJ10/SLC12A6/SLC39A14/ATP1B1/ATP1A1/SLC34A1/SLC31A1	26
GO:0098739	import across plasma membrane	45/2706	113/12386	1.12582e+09	0.00123932	0.001076	KCNJ3/SLC47A1/SLC6A9/KCNQ1/SLC12A8/WNK2/SLC15A1/SLC8A1/SLC5A1/SLC9A2/SLC2A5/ACSL1/SLC36A1/SLC9A7/TRPV1/ABCC9/SLC22A4/SLC19A1/ATP2B4/SLC43A2/KCNH2/KCNJ16/SLC1A1/SLC27A1/SLC9A3/CALCR/SLC9A3R1/SLC43A1/HFE/SLC7A1/LRP2/FYN/SLC5A3/DLG1/KCNJ10/SLC6A6/ACE2/SLC12A6/SLC39A14/SLC22A2/ATP1B1/AGT/ATP1A1/SLC34A1/SLC31A1	45
GO:0098771	inorganic ion homeostasis	150/2706	472/12386	2.17544e+07	0.000102308	8.88257e+09	PRKD1/AKAP6/ADCY5/PRKN/BTBD9/OTC/CACNB2/ANK2/ITPR2/PKHD1/PLCE1/CHRNA7/UPK3A/NEO1/SLC10A7/EXT1/COMMD1/KCNMA1/CNNM2/CAMK2D/MICU1/SLC6A9/JPH2/PRKCE/SLC11A2/RYR2/STIM1/KCNQ1/ITPR1/FAM20A/SLC12A8/CP/CLDN16/JAK2/ANK3/TRPC7/SLC4A8/SLC8A1/SLC9A2/GRIN2B/CX3CR1/XPR1/TMEM178A/LPAR1/TTC7A/CKB/ANXA6/SLC30A10/VDR/TRPC3/PLA2G6/EGFR/MCU/PLCG2/DISC1/SLC40A1/SLC9A7/SNX10/DRD2/HTT/TSPOAP1/AP3B1/BDH2/TMPRSS6/EXT2/CD…	150
GO:0099536	synaptic signaling	138/2706	427/12386	2.27605e+06	0.000102308	8.88257e+09	GRIK4/GRID1/KCNB1/CNTN4/PRKN/GRIK2/BTBD9/SHANK2/CACNB2/ADCY1/UNC13C/SYT2/SV2B/CPEB3/ABAT/PPP1R9A/CHRNA7/SORCS2/EXOC4/ERC1/LIN7A/FCHSD2/BEGAIN/GPR176/PLCB1/COLQ/EXT1/CASK/RIMS4/PTPRD/MCTP2/PRKCE/RAB26/CRTC1/SIPA1L1/FARP1/DTNA/SYT11/LZTS1/PRKAR1B/DTNB/EPHB2/UNC13B/CHRNA1/CHRNA2/MBP/JAK2/SLC4A8/AKAP7/ABR/BCR/GRIN2B/CX3CR1/PPP3CA/PTPRA/RHOT1/PLA2G6/OPHN1/GNAQ/GABRA2/DTNBP1/GABBR2/KCNIP2/EGFR/ADARB1/E…	138
GO:0099587	inorganic ion import across plasma membrane	26/2706	58/12386	7.84504e+09	0.00472067	0.00409857	KCNJ3/SLC6A9/KCNQ1/SLC12A8/WNK2/SLC8A1/SLC5A1/SLC9A2/SLC9A7/TRPV1/ABCC9/ATP2B4/KCNH2/KCNJ16/SLC9A3/CALCR/HFE/FYN/DLG1/KCNJ10/SLC12A6/SLC39A14/ATP1B1/ATP1A1/SLC34A1/SLC31A1	26
GO:0099622	cardiac muscle cell membrane repolarization	13/2706	23/12386	0.000306798	0.0115725	0.0100474	KCND3/KCNJ3/CACNA1D/ANK2/KCNQ1/SCN5A/KCNIP2/NOS1AP/KCNH2/AKAP9/SNTA1/ATP1B1/ATP1A1	13
GO:0110148	biomineralization	38/2706	111/12386	0.00175735	0.0339162	0.0294466	PHEX/STIM1/ITGB6/FAM20A/GAS6/DDR2/LOX/FAM20C/SLC8A1/IBSP/BMPR2/ANKH/FGFR2/BMPR1A/ANO6/SMPD3/SNX10/RFLNB/PTH1R/ADGRV1/ENPP1/ODAM/CFTR/IFT80/ACVR1/MMP20/ENAM/ASGR2/TSPEAR/AHSG/FBXL15/SMAD3/MEF2C/BMP2K/WNT11/FOXO1/CCR1/PPARA	38
GO:0120035	regulation of plasma membrane bounded cell projection organization	133/2706	479/12386	0.0010886	0.0258674	0.0224585	PRKD1/DAB1/PLXNC1/HDAC4/CDH4/TNIK/FGF13/SEMA5B/PTPRG/SEMA5A/PLCE1/BCAS3/PPP1R9A/PREX1/EVL/MAP6/ARSB/SDC2/PTPRD/FER/IFT140/CRTC1/SIPA1L1/COBL/LZTS1/TBC1D30/EPHB2/NGEF/CARMIL1/TIAM1/CUX1/TENM3/MINAR1/ROBO1/ULK4/BRSK2/WDPCP/SEMA4D/MAP4/DCDC2/GRIN2B/BMPR2/LPAR1/PPP3CA/MBOAT1/SDCCAG8/EEF2K/CREB3L2/ARHGAP44/MYO10/DISC1/PLD1/HTT/SEPTIN9/CBFA2T2/CAMK1D/SEMA6C/FIG4/NEDD4L/CDKL5/NCS1/SHANK3/SRCIN1/RAPGEF1/…	133
GO:0120039	plasma membrane bounded cell projection morphogenesis	139/2706	446/12386	2.03106e+08	0.000388031	0.000336895	CNTN4/DAB1/PLXNC1/EPB41L3/PRKN/CDH4/CRPPA/TNIK/FGF13/ADCY1/SEMA5B/SEMA5A/SYT2/PTPRM/ATL1/DSCAML1/VSTM2L/PPP1R9A/CHRNA7/CYFIP2/MAP6/NEO1/PRKCQ/EXT1/EPHA6/PARD3/SDC2/ALCAM/PTPRD/SLC11A2/SIPA1L1/COBL/FARP1/TRIO/LZTS1/EPHB2/NRCAM/NGEF/NRXN3/TIAM1/CUX1/ROBO1/ANK3/NRN1/BRSK2/RNF157/SEMA4D/SLC23A2/DCDC2/MYO9A/BMPR2/FGFR2/RPS6KA5/PPP3CA/OPHN1/DTNBP1/SRGAP2/EGFR/PTK2/ADARB1/EEF2K/ARHGAP44/DISC1/PRKCZ/KLF7…	139
GO:0140115	export across plasma membrane	20/2706	44/12386	0.000410878	0.013737	0.0119267	KCND3/ABCC4/SLC47A1/ABCA1/SLC47A2/KCNQ1/SLC8A1/KCNIP2/ANO6/SLC40A1/ATP7B/KCNH2/ABCC2/ABCC1/SLC27A1/DLG1/PDZK1/SLC22A2/ATP1B1/ATP1A1	20
GO:0150104	transport across blood-brain barrier	28/2706	70/12386	0.000449353	0.0145138	0.0126011	SLC2A13/ABCC4/ATP8A1/SLC6A9/SLC28A2/SLC4A8/SLC5A1/INSR/LEPR/SLC44A1/ABCC9/SLC38A5/LRP1/SLC19A1/ATP2B4/SLC1A1/ABCC2/ABCC1/SLC38A3/SLC27A1/LRP3/SLC9A3R1/SLC7A1/LRP2/SLC5A3/SLC6A6/SLC22A3/SLC22A2	28
GO:1901568	fatty acid derivative metabolic process	23/2706	55/12386	0.000680108	0.0190564	0.0165451	ACSM2A/FAR2/OXCT2/ACOT7/ELOVL7/PAM/DGAT2/ACACA/ACSL1/ELOVL6/AACS/ACSS3/CYP4F3/HMGCS2/ACSL4/ACAT1/ACSF3/HACD2/ELOVL5/HSD17B12/ALOX15B/FITM2/CYP4F2	23
GO:1901615	organic hydroxy compound metabolic process	141/2706	412/12386	294776	3.97505e+08	3.45121e+08	INPP4B/OCA2/PRKN/OSBPL6/BTBD9/MOGAT2/MAOA/PLA2G4A/INPP5A/TPK1/ABAT/SULT1B1/SLC16A10/ABCA1/SULT1E1/MALRD1/PAH/CUBN/SPTLC3/ASAH2/CD244/ITPK1/CYP8B1/RXRA/MAOB/SGPP2/ITPKB/GCNT4/LRP5/PCK1/CYP2E1/SLC27A2/CPQ/TG/AKR1D1/RPE65/DDC/SCARB1/DGAT2/ALDH3B1/PLCG2/LEPR/ACER3/DRD2/SLC25A12/DEGS2/CYP7A1/CYP4F3/PCSK9/PTH1R/DAO/SULT2A1/FAXDC2/SOAT2/GPD1/NPR1/AKR1C2/NUDT3/CYP3A4/FMO5/CAT/CRYM/PECR/TSKU/CYP27A1/EPHX2…	141
GO:1901616	organic hydroxy compound catabolic process	26/2706	58/12386	7.84504e+09	0.00472067	0.00409857	INPP4B/MAOA/INPP5A/SULT1B1/SULT1E1/MAOB/AKR1D1/SCARB1/ALDH3B1/CYP7A1/CYP4F3/SULT2A1/NUDT3/CYP3A4/CYP27A1/GK/SORD/TKFC/ALDH2/SYNJ2/COMT/AKR1C3/CYP4F2/MTMR2/IMPA2/BPNT2	26
GO:1901655	cellular response to ketone	28/2706	73/12386	0.000987119	0.0239843	0.0208236	ADCY5/SMYD3/ADCY1/TNFSF4/AR/ASS1/PRKCE/GAS6/PCK1/EGFR/ACACA/AACS/SRC/AKR1C2/NR3C1/CFTR/ABCC2/DCPS/SPHK2/AQP1/ARG1/GNB1/ADCY3/PCK2/FOXO3/AKR1C3/FDX1/FOXO1	28
GO:1901699	cellular response to nitrogen compound	140/2706	493/12386	0.000290525	0.0112131	0.00973542	GHR/AKAP6/ADCY5/PRKN/ITPR2/CPEB3/CHRNA7/SPIDR/PDE3A/RPTOR/PLCB1/PID1/IGF1R/PRKCQ/ASS1/ATG7/FER/KLF15/SORBS1/STXBP4/G6PC1/UMODL1/RYR2/KCNQ1/AIF1/KAT2B/PDE3B/SORL1/GPLD1/JAK2/GNRHR2/PCK1/ANO1/SLC8A1/INSR/PKLR/CPS1/PDGFC/SLC30A10/PTPRA/PTPRE/GNAQ/RPE65/RRAGD/C2CD5/DDC/DTNBP1/CYBB/PTK2/COL5A2/EEF2K/SMPD3/GKAP1/PRKCZ/DRD2/SHMT1/MBD5/ATRX/WT1/TRPV1/GRB14/SESN3/PCSK9/SOGA1/HTR1D/RAPGEF1/IFIT1/LRP1/GPD1/…	140
GO:1902306	negative regulation of sodium ion transmembrane transport	9/2706	12/12386	0.000128477	0.00660004	0.00573026	COMMD1/CAMK2D/PRKCE/STK39/PCSK9/NEDD4L/NEDD4/SLC9A3R1/HECW2	9
GO:1905039	carboxylic acid transmembrane transport	40/2706	112/12386	0.000524809	0.0158185	0.0137339	SLC47A1/SLC16A10/SLC25A21/SLC6A9/SLC38A4/SLC5A12/SLC23A2/SLC36A2/SLC38A6/ACSL1/SLC36A1/SFXN2/SLC25A12/SLC38A5/SLC6A19/SLC22A4/SLC19A1/SLC7A7/SLC13A2/SLC38A11/SLC43A2/SLC1A1/ABCC1/SLC38A3/SLC27A1/LRRC8D/SLC43A1/SLC13A5/SLC7A1/LRP2/SLC25A13/SLC3A1/CPT1A/KCNJ10/MPC2/SLC6A6/SLC23A1/ACE2/SLC22A2/AGT	40
GO:1905144	response to acetylcholine	10/2706	18/12386	0.00185779	0.0346744	0.0301048	CHRNA7/PLCB1/GNAQ/ATP2B4/GNA11/CHRM3/LYPD1/RGS10/GNB1/AGRN	10
GO:1905145	cellular response to acetylcholine	10/2706	18/12386	0.00185779	0.0346744	0.0301048	CHRNA7/PLCB1/GNAQ/ATP2B4/GNA11/CHRM3/LYPD1/RGS10/GNB1/AGRN	10
GO:1990845	adaptive thermogenesis	40/2706	118/12386	0.00166793	0.0328352	0.028508	ESRRG/PTH2R/PRDM16/EBF2/IGF1R/KSR2/PEMT/BMP8A/PRLR/SORL1/JAK2/ZNF516/PDGFC/HADH/ALMS1/MAP2K6/ACSL1/LEPR/UCP3/ELOVL6/TRPV1/DOCK7/RB1/EHMT1/G0S2/ARNTL/GATM/THRA/PPARGC1B/LPIN1/THADA/SCD/GRB10/ALDH1A1/MFAP2/RBPJ/SLC25A5/DECR1/ACOT13/IL15	40

## Sheet: AFB1+BEN.UP
ID	Description	GeneRatio	BgRatio	pvalue	p.adjust	qvalue	geneID	Count
GO:0005975	carbohydrate metabolic process	45/642	481/12386	8.53117e+09	0.0115284	0.0109169	GBA3/MOGAT2/FBP1/INPP4B/ITPK1/SLC2A2/GALM/PDK3/G6PC1/GYG2/ST6GALNAC3/CHST13/SMPD3/MAN1A1/SORBS1/ST3GAL5/RBKS/ACACB/PKLR/KHK/INPP5A/LRP5/INSR/DGAT2/CHST9/B3GNT7/B4GALNT2/FUT10/ITPKA/XYLB/FUT8/IDH1/NCOA2/CBFA2T3/ST8SIA6/GPD1L/HS2ST1/GALK2/PGM1/SLC2A5/CD244/GPD1/MAN2A1/KCNJ11/GK	45
GO:0006491	N-glycan processing	5/642	15/12386	0.000716013	0.0495567	0.0469278	MAN1A1/MGAT4A/FUT8/ST8SIA6/MAN2A1	5
GO:0006575	cellular modified amino acid metabolic process	24/642	149/12386	6.57166e+07	0.000444025	0.000420471	SARDH/SULT1B1/SLC16A10/GSTA1/NAT8/ASS1/ALDH1L1/GSTM4/DIO1/HOGA1/SLC1A1/BBOX1/IDH1/CKB/SULT2A1/GSTA2/SHMT1/CRYM/MTHFS/CROT/PEMT/SLC19A1/TMLHE/GAMT	24
GO:0006699	bile acid biosynthetic process	7/642	30/12386	0.000695743	0.0494832	0.0468583	SLC27A2/CYP8B1/AKR1D1/NR1H4/CYP27A1/OSBPL1A/FGF19	7
GO:0006790	sulfur compound metabolic process	30/642	280/12386	0.00012831	0.0157627	0.0149266	SULT1B1/SULT2B1/KYNU/SULT1E1/GSTA1/XDH/NAT8/GHR/CPS1/PDK3/MAT1A/GSTM4/CHST13/ACACB/DGAT2/CHST9/SLC1A1/SLC26A1/B3GNT7/ACOT7/IDH1/FAR2/PAPSS2/TPST1/SULT2A1/GSTA2/SLC19A3/PEMT/AHCYL2/ELOVL7	30
GO:0006869	lipid transport	32/642	294/12386	5.69873e+09	0.00971255	0.00919733	GRAMD1B/ATP8A1/SLC27A2/NR0B2/FABP2/ABCC4/CYP8B1/ABCA10/ABCA1/FABP6/SLC10A2/ATP10B/DENND5B/RXRA/MSR1/MYB/SOAT2/ATP9A/SLCO1A2/ANO6/TEX2/CFTR/PCSK9/LIMA1/CROT/SCARB1/OSBPL1A/TTC39B/ABCA3/ATP11A/MAP2K6/PLA2R1	32
GO:0007586	digestion	14/642	78/12386	4.11623e+09	0.00878273	0.00831683	MOGAT2/FABP2/ASAH2/VDR/CYP8B1/AKR1D1/CRACD/SOAT2/PBLD/LIMA1/SLC2A5/SCARB1/SLC5A1/PLS1	14
GO:0008206	bile acid metabolic process	8/642	39/12386	0.000734517	0.0496289	0.0469962	SLC27A2/CYP8B1/AKR1D1/NR1H4/CYP27A1/SULT2A1/OSBPL1A/FGF19	8
GO:0008643	carbohydrate transport	16/642	122/12386	0.000550212	0.042086	0.0398535	SLC2A7/SLC5A11/SLC2A9/STXBP4/SLC2A2/SMPD3/SORBS1/INSR/SLC17A5/TMEM144/C2CD5/SLC5A9/SLC2A5/SLC5A1/PLS1/FGF19	16
GO:0009308	amine metabolic process	13/642	81/12386	0.00024921	0.0238922	0.0226248	MAOA/SULT1B1/KYNU/NPR1/PAH/DDC/NR1H4/MAOB/SLC1A1/SLC44A1/ABAT/DAO/SLC7A7	13
GO:0009410	response to xenobiotic stimulus	33/642	346/12386	0.000526977	0.0411732	0.0389891	DAB1/SULT1B1/FBP1/ABCC4/NCOA1/GATA4/GSTA1/PDE3A/NFATC2/FMO1/NAT8/ASS1/ADCY1/CPS1/ABCA1/GSTM4/DDC/ACACB/MAOB/GAS6/ABAT/CMBL/EMX1/SULT2A1/GSTA2/PEMT/KCNJ11/APOBEC1/ABCA3/MAP2K6/CYP2U1/MGMT/FMO5	33
GO:0010876	lipid localization	35/642	335/12386	6.0544e+09	0.00971255	0.00919733	GRAMD1B/ATP8A1/SLC27A2/NR0B2/FABP2/ABCC4/CYP8B1/ABCA10/ABCA1/FABP6/SLC10A2/ATP10B/DENND5B/RXRA/CDS1/MSR1/MYB/ACACB/SOAT2/ATP9A/SLCO1A2/ANO6/TEX2/DGAT2/CFTR/PCSK9/LIMA1/CROT/SCARB1/OSBPL1A/TTC39B/ABCA3/ATP11A/MAP2K6/PLA2R1	35
GO:0015850	organic hydroxy compound transport	28/642	189/12386	4.64273e+07	0.000376432	0.000356464	KCNB1/GRAMD1B/SYT2/SLC5A11/NR0B2/ABCC4/CYP8B1/ABCA1/SLC5A12/SLC10A2/SYT13/SLC2A13/RXRA/MSR1/MYB/SOAT2/SLCO1A2/MAOB/CFTR/ABAT/DTNBP1/PCSK9/LIMA1/SCARB1/SLC5A1/OSBPL1A/TTC39B/ABCA3	28
GO:0016042	lipid catabolic process	26/642	252/12386	0.000633099	0.0459734	0.0435346	GBA3/PLCE1/SLC27A2/SULT1E1/ASAH2/PLD1/CPS1/AKR1D1/SMPD3/ACACB/CYP27A1/PDE3B/AIG1/PLCH1/IDH1/SORL1/BDH2/PLA2G4E/SULT2A1/ABHD1/FAAH2/DAGLA/CROT/SCARB1/ACAD11/ACAT2	26
GO:0016125	sterol metabolic process	20/642	128/12386	8.94913e+08	0.00302331	0.00286294	SULT2B1/NR0B2/CYP8B1/ABCA1/RXRA/AKR1D1/NR1H4/SOAT2/CYP27A1/LRP5/DGAT2/CFTR/FAXDC2/SULT2A1/PCSK9/LIMA1/SCARB1/OSBPL1A/TTC39B/FMO5	20
GO:0018958	phenol-containing compound metabolic process	13/642	71/12386	6.21089e+09	0.00971255	0.00919733	MAOA/SULT1B1/SLC16A10/NPR1/PAH/DDC/MAOB/DIO1/SLC1A1/ABAT/DAO/SULT2A1/CRYM	13
GO:0022600	digestive system process	12/642	65/12386	0.000108946	0.0138021	0.01307	MOGAT2/FABP2/VDR/CYP8B1/CRACD/SOAT2/PBLD/LIMA1/SLC2A5/SCARB1/SLC5A1/PLS1	12
GO:0023061	signal release	34/642	322/12386	6.22907e+09	0.00971255	0.00919733	KCNB1/SYT2/SSTR5/VSNL1/SLC16A10/NR0B2/ABCC4/CASK/STXBP4/ADCY1/ABCA1/ERC2/SYT13/RIMS4/UNC13C/BMP8A/SMPD3/MCTP2/NR1H4/MYB/MAOB/LRP5/PCSK5/CFTR/ABAT/RAB11FIP3/DTNBP1/NDUFAF2/RIMS3/KCNJ11/NCS1/MAP2K6/MCU/RHOT1	34
GO:0032787	monocarboxylic acid metabolic process	46/642	466/12386	1.88885e+09	0.00478586	0.00453199	HAO2/FBP1/SLC27A2/KYNU/ASAH2/PTGIS/GSTA1/CYP8B1/TECRL/PDK3/GSTM4/AKR1D1/HAL/CRYL1/NR1H4/ACACB/ALOX5AP/PKLR/CYP27A1/INSR/AIG1/DGAT2/HOGA1/ACOT7/XYLB/IDH1/ABAT/CBFA2T3/AGXT2/BDH2/SULT2A1/ABHD1/FAAH2/PGM1/DAGLA/MTHFS/CROT/GPD1/OSBPL1A/ELOVL7/CYP2U1/ACAD11/UGT2A3/FGF19/ACAT2/GAMT	46
GO:0034035	purine ribonucleoside bisphosphate metabolic process	7/642	18/12386	1.87438e+09	0.00478586	0.00453199	SULT1B1/SULT2B1/SULT1E1/SLC26A1/PAPSS2/TPST1/SULT2A1	7
GO:0034219	carbohydrate transmembrane transport	14/642	92/12386	0.000259314	0.0238922	0.0226248	SLC2A7/SLC5A11/SLC2A9/STXBP4/SLC2A2/SORBS1/INSR/SLC17A5/TMEM144/C2CD5/SLC5A9/SLC2A5/SLC5A1/FGF19	14
GO:0038183	bile acid signaling pathway	5/642	12/12386	0.00021508	0.0215764	0.0204319	ABCC4/VDR/CYP8B1/NR1H4/DGAT2	5
GO:0042417	dopamine metabolic process	7/642	24/12386	0.000155177	0.0185026	0.0175211	MAOA/NPR1/DDC/MAOB/SLC1A1/ABAT/DAO	7
GO:0042632	cholesterol homeostasis	11/642	66/12386	0.000528122	0.0411732	0.0389891	GRAMD1B/ABCA1/G6PC1/SOAT2/LRP5/MALL/DGAT2/PCSK9/LIMA1/SCARB1/TTC39B	11
GO:0043266	regulation of potassium ion transport	11/642	55/12386	9.87396e+09	0.0129126	0.0122276	CACNA1D/ANK2/ANK3/KCNAB2/ANO6/BIN1/WWP2/WNK2/AMIGO1/KCNIP2/NEDD4	11
GO:0044106	cellular amine metabolic process	13/642	78/12386	0.000168841	0.0195566	0.0185192	MAOA/SULT1B1/KYNU/NPR1/PAH/DDC/NR1H4/MAOB/SLC1A1/SLC44A1/ABAT/DAO/SLC7A7	13
GO:0044282	small molecule catabolic process	49/642	315/12386	351.392	1.42454e+06	1.34898e+06	SARDH/SULT1B1/INPP4B/SLC27A2/KYNU/SULT1E1/XDH/GALM/ALDH6A1/ALDH1L1/PAH/MAT1A/AKR1D1/BCKDHB/HAL/OXCT2/RBKS/ACACB/CYP27A1/INPP5A/LRP5/AIG1/DDAH1/GLS2/HOGA1/FUT10/XYLB/FUT8/ABAT/GLDC/AGXT2/DAO/BDH2/APOBEC2/CDA/SULT2A1/ABHD1/SHMT1/CRYM/MTHFS/CROT/SCARB1/ALDH3B1/APOBEC1/GK/HYKK/HIBCH/ACAD11/ACAT2	49
GO:0046394	carboxylic acid biosynthetic process	28/642	245/12386	7.02208e+09	0.0105435	0.00998423	SLC27A2/KYNU/ASAH2/PTGIS/CYP8B1/TECRL/ASS1/CPS1/PAH/GSTM4/AKR1D1/NR1H4/ACACB/ALOX5AP/PKLR/CYP27A1/GLS2/HOGA1/ACOT7/NAGS/ABAT/AGXT2/ABHD1/SHMT1/OSBPL1A/ELOVL7/FGF19/GAMT	28
GO:0046395	carboxylic acid catabolic process	31/642	204/12386	6.23728e+06	8.42864e+08	7.98153e+08	SARDH/SLC27A2/KYNU/ALDH6A1/ALDH1L1/PAH/MAT1A/AKR1D1/BCKDHB/HAL/ACACB/AIG1/DDAH1/GLS2/HOGA1/XYLB/ABAT/GLDC/AGXT2/DAO/BDH2/SULT2A1/ABHD1/SHMT1/CRYM/MTHFS/CROT/HYKK/HIBCH/ACAD11/ACAT2	31
GO:0050427	3'-phosphoadenosine 5'-phosphosulfate metabolic process	7/642	18/12386	1.87438e+09	0.00478586	0.00453199	SULT1B1/SULT2B1/SULT1E1/SLC26A1/PAPSS2/TPST1/SULT2A1	7
GO:0050892	intestinal absorption	10/642	32/12386	2.9799e+08	0.00151006	0.00142996	MOGAT2/FABP2/VDR/CYP8B1/SOAT2/LIMA1/SLC2A5/SCARB1/SLC5A1/PLS1	10
GO:0070166	enamel mineralization	5/642	14/12386	0.000498471	0.0411732	0.0389891	ITGB6/STIM1/FAM20C/FAM20A/CFTR	5
GO:0071805	potassium ion transmembrane transport	15/642	107/12386	0.000396149	0.0349128	0.0330607	KCNB1/CACNA1D/ANK2/SLC12A8/ANK3/KCNAB2/ANO6/BIN1/WWP2/WNK2/AMIGO1/KCNIP2/KCNK15/KCNJ11/NEDD4	15
GO:1901379	regulation of potassium ion transmembrane transport	11/642	51/12386	4.74714e+09	0.00962246	0.00911201	CACNA1D/ANK2/ANK3/KCNAB2/ANO6/BIN1/WWP2/WNK2/AMIGO1/KCNIP2/NEDD4	11
GO:1901615	organic hydroxy compound metabolic process	49/642	412/12386	409976	8.31021e+09	7.86938e+09	MOGAT2/MAOA/SULT1B1/SULT2B1/INPP4B/SLC16A10/SLC27A2/NR0B2/ITPK1/SULT1E1/ASAH2/CYP8B1/SPTLC3/ABCA1/NPR1/PAH/RPE65/RXRA/AKR1D1/DDC/NR1H4/SOAT2/CYP27A1/MAOB/INPP5A/LRP5/DIO1/DEGS2/DGAT2/SLC1A1/ITPKA/CFTR/IDH1/ABAT/DAO/FAXDC2/SULT2A1/PCSK9/LIMA1/CRYM/CD244/GPD1/SCARB1/ALDH3B1/OSBPL1A/TTC39B/GK/FMO5/FGF19	49
GO:1901616	organic hydroxy compound catabolic process	12/642	58/12386	3.3633e+09	0.0075749	0.00717307	MAOA/SULT1B1/INPP4B/SULT1E1/AKR1D1/CYP27A1/MAOB/INPP5A/SULT2A1/SCARB1/ALDH3B1/GK	12
GO:1905954	positive regulation of lipid localization	12/642	78/12386	0.000635054	0.0459734	0.0435346	ATP8A1/CYP8B1/ABCA1/DENND5B/RXRA/MSR1/MYB/ACACB/SCARB1/ABCA3/MAP2K6/PLA2R1	12

## Sheet: AFB1+BEN.DOWN
ID	Description	GeneRatio	BgRatio	pvalue	p.adjust	qvalue	geneID	Count
GO:0001525	angiogenesis	31/507	389/12386	0.000304499	0.04082	0.0380507	TNF/SERPINE1/ENPP2/PLXDC1/ABCC8/ZNF304/ECM1/TYMP/NGFR/PLK2/ALOX5/PTGS2/JUN/ETS1/JMJD6/CCN1/FGF18/CDH5/GREM1/ZC3H12A/SIRT6/ANXA1/ADM/CYP1B1/IL6/CXCR4/SEMA4A/ENPEP/SHC1/PARVA/CCR3	18
GO:0001578	microtubule bundle formation	12/507	76/12386	5.52316e+09	0.0117091	0.0109147	RSPH9/SPEF1/DNAI1/CFAP97D1/ZMYND10/ODAD1/FES/PLK1/TPPP3/DRC1/TTLL3/ODAD3	19
GO:0002250	adaptive immune response	23/507	256/12386	0.000344614	0.0421558	0.039296	IFNA5/TNF/LTA/LAT2/BTLA/IL23A/C8G/ERCC1/CD79A/CD86/HAVCR2/ZC3H12A/IRF7/ANXA1/WAS/IL6/SEMA4A/CD55/TNFSF13B/MBL2/LIME1/C1R/TFE3	19
GO:0002251	organ or tissue specific immune response	5/507	17/12386	0.000462933	0.0484621	0.0451744	H2BC8/H2BC6/H2BC21/IL6/H2BC4	39
GO:0002252	immune effector process	29/507	359/12386	0.000378793	0.0424484	0.0395687	IFNA5/TNF/LTA/LAT2/NR4A3/IL23A/FER1L5/IL5/C8G/CFP/ERCC1/ULBP2/FES/ULBP3/RAET1G/CD86/APBB1IP/HAVCR2/SEMA7A/LGALS1/ZC3H12A/IRF7/ANXA1/WAS/IL6/SEMA4A/CD55/MBL2/C1R	20
GO:0003341	cilium movement	12/507	95/12386	0.000481252	0.0484621	0.0451744	RSPH9/SPEF1/DNAI1/CFAP97D1/CFAP53/ZMYND10/ODAD1/TCTE1/SEPTIN4/DRC1/TTLL3/ODAD3	24
GO:0006323	DNA packaging	20/507	130/12386	3.04223e+07	0.000153176	0.000142784	H4C3/H4C12/H2BC8/H4C5/H2BC18/H2BC9/H4C8/H3C12/TSPYL2/H3C6/H2BC19P/H2BC6/H2BC21/H3C10/H4-16/LMNTD2/H2BC15/PLK1/H1-3/H2BC4	17
GO:0006334	nucleosome assembly	18/507	75/12386	84471.6	3.40252e+08	3.17169e+08	H4C3/H4C12/H2BC8/H4C5/H2BC18/H2BC9/H4C8/H3C12/TSPYL2/H3C6/H2BC19P/H2BC6/H2BC21/H3C10/H4-16/H2BC15/H1-3/H2BC4	39
GO:0006954	inflammatory response	39/507	453/12386	9.03463e+08	0.00303262	0.00282689	TNF/LTA/SERPINE1/NLRC4/IL23A/CDO1/H19/IL5/UCN/CD200R1/S1PR3/UGT1A1/MEFV/ECM1/GAL/AOC3/PLK2/ALOX5/PTGS2/CYP26B1/HAVCR2/ETS1/LTB4R2/CDH5/HRH1/SEMA7A/ZC3H12A/GGT1/LTB4R/ANXA1/GPS2/ADM/PLA2G4C/IL6/CXCR4/MBL2/IL36RN/CCR3/TIMP1	18
GO:0006959	humoral immune response	19/507	105/12386	4.23354e+06	5.68423e+09	5.29861e+09	IFNA5/TNF/LTA/H2BC8/WFDC3/C8G/CFP/ALOX5/H2BC6/H2BC21/POU2F2/IL6/CD55/MBL2/WFDC2/H2BC4/C1R/IL36RN/TFE3	19
GO:0007186	G protein-coupled receptor signaling pathway	39/507	392/12386	2.52459e+06	0.000145272	0.000135417	GPR65/PDE6G/GPBAR1/GRK7/UCN/S1PR3/GAST/GPR179/RASD1/GNAI1/RRH/FZD10/GAL/LGR5/HTR2C/CDK5R1/ARRDC3/GPR87/LTB4R2/APLP1/NTS/GABBR1/HRH1/GPR3/LTB4R/ANXA1/ADM/CXCR4/LHB/GPR199P/CGB7/P2RY11/GPR83/AKAP12/UCN2/PDE4D/CA2/RGS5/CCR3	12
GO:0007565	female pregnancy	16/507	145/12386	0.00028906	0.04082	0.0380507	FOSB/FOSL1/UCN/ABCC8/MMP7/THBD/PTGS2/HAVCR2/ETS1/JUNB/GNRH1/OVGP1/ADM/TPPP3/SYDE1/TIMP1	19
GO:0030219	megakaryocyte differentiation	8/507	42/12386	0.000257331	0.0398665	0.0371619	H4C3/H4C12/H4C5/H4C8/MPIG6B/IL11/H4-16/CDKN2B	9
GO:0034728	nucleosome organization	19/507	108/12386	6.78915e+06	6.83667e+09	6.37287e+09	H4C3/H4C12/H2BC8/H4C5/H2BC18/H2BC9/H4C8/H3C12/TSPYL2/H3C6/H2BC19P/H2BC6/H2BC21/H3C10/H4-16/H2BC15/H1-3/SRCAP/H2BC4	6
GO:0035082	axoneme assembly	9/507	49/12386	0.000142948	0.0268188	0.0249994	RSPH9/SPEF1/DNAI1/CFAP97D1/ZMYND10/ODAD1/DRC1/TTLL3/ODAD3	8
GO:0042742	defense response to bacterium	17/507	120/12386	7.42435e+08	0.00271866	0.00253423	TNF/LTA/H2BC8/SERPINE1/NLRC4/SSC5D/IL23A/WFDC3/CFP/H2BC6/H2BC21/HAVCR2/IL6/MBL2/SHC1/WFDC2/H2BC4	16
GO:0043062	extracellular structure organization	24/507	205/12386	3.42619e+08	0.00138007	0.00128645	TNF/ADAMTS4/SPOCK2/MMP13/MMP10/MIA/TEX14/ANTXR1/MMP7/HAS3/EFEMP2/ADAMTS6/ETS1/COL9A3/CCN1/APLP1/GREM1/CYP1B1/IL6/COL11A2/HAS2/CRISPLD2/FSCN1/QSOX1	20
GO:0044060	regulation of endocrine process	6/507	21/12386	0.000146478	0.0268188	0.0249994	GDF9/UCN/GAL/CRY2/NKX3-1/INHBB	31
GO:0044706	multi-multicellular organism process	19/507	159/12386	2.66626e+09	0.00596651	0.00556173	FOSB/FOSL1/UCN/ABCC8/MAFF/SERPINE2/MMP7/THBD/PTGS2/HAVCR2/ETS1/JUNB/GNRH1/OVGP1/ADM/PLA2G4C/TPPP3/SYDE1/TIMP1	9
GO:0045765	regulation of angiogenesis	20/507	206/12386	0.000304177	0.04082	0.0380507	TNF/SERPINE1/ENPP2/ABCC8/ZNF304/ECM1/PLK2/ALOX5/ETS1/FGF18/CDH5/GREM1/ZC3H12A/SIRT6/ADM/CYP1B1/IL6/CXCR4/SEMA4A/CCR3	23
GO:0050886	endocrine process	9/507	54/12386	0.000308571	0.04082	0.0380507	GDF9/UCN/TRPV6/GAL/CRY2/MME/ENPEP/NKX3-1/INHBB	10
GO:0060968	regulation of gene silencing	10/507	67/12386	0.000366977	0.0424484	0.0395687	TNF/LIN28A/H3C12/ZNF304/H3C6/BCDIN3D/H3C10/KCNQ1OT1/ZC3H12A/IL6	29
GO:0060986	endocrine hormone secretion	7/507	34/12386	0.00037938	0.0424484	0.0395687	GDF9/UCN/TRPV6/GAL/CRY2/NKX3-1/INHBB	7
GO:0065004	protein-DNA complex assembly	18/507	139/12386	1.44112e+09	0.00362801	0.00338189	H4C3/H4C12/H2BC8/H4C5/H2BC18/H2BC9/H4C8/H3C12/TSPYL2/H3C6/H2BC19P/H2BC6/H2BC21/H3C10/H4-16/H2BC15/H1-3/H2BC4	5
GO:0071824	protein-DNA complex subunit organization	19/507	174/12386	9.25684e+09	0.0186433	0.0173785	H4C3/H4C12/H2BC8/H4C5/H2BC18/H2BC9/H4C8/H3C12/TSPYL2/H3C6/H2BC19P/H2BC6/H2BC21/H3C10/H4-16/H2BC15/H1-3/SRCAP/H2BC4	4
GO:2000831	regulation of steroid hormone secretion	4/507	10/12386	0.000478398	0.0484621	0.0451744	GDF9/GAL/CRY2/NKX3-1	12

## Sheet: IND
ID	Description	GeneRatio	BgRatio	pvalue	p.adjust	qvalue	geneID	Count
GO:1901214	regulation of neuron death	6/1930	246/12386	2.29841e+08	0.0148592	0.0107704	CRLF1/CLU/PTPRZ1/SLC7A11/DKK1/SERPINF1	6
GO:0006956	complement activation	3/1930	28/12386	4.03249e+09	0.0148592	0.0107704	CLU/A2M/C3	3
GO:0010466	negative regulation of peptidase activity	5/1930	163/12386	4.05353e+09	0.0148592	0.0107704	TIMP1/A2M/ECM1/C3/SERPINF1	5
GO:0070997	neuron death	6/1930	282/12386	4.94893e+09	0.0148592	0.0107704	CRLF1/CLU/PTPRZ1/SLC7A11/DKK1/SERPINF1	6
GO:0050890	cognition	5/1930	192/12386	8.8352e+09	0.0212222	0.0153826	PTPRZ1/SLC7A11/SLC1A4/DKK1/SERPINF1	5
GO:0002252	immune effector process	6/1930	359/12386	0.000187239	0.0369021	0.0267479	AZGP1/LGALS1/CLU/A2M/ARG1/C3	6
GO:0015807	L-amino acid transport	3/1930	54/12386	0.000292619	0.0369021	0.0267479	ARG1/SLC7A11/SLC1A4	3
GO:0007568	aging	5/1930	258/12386	0.000350921	0.0369021	0.0267479	TIMP1/ARG1/IGFBP1/DKK1/SERPINF1	5
GO:0051346	negative regulation of hydrolase activity	5/1930	258/12386	0.000350921	0.0369021	0.0267479	TIMP1/A2M/ECM1/C3/SERPINF1	5
GO:0032102	negative regulation of response to external stimulus	5/1930	259/12386	0.000357224	0.0369021	0.0267479	SEMA3G/A2M/ARG1/APOH/SERPINF1	5
GO:0002888	positive regulation of myeloid leukocyte mediated immunity	2/1930	14/12386	0.000506848	0.0431894	0.0313052	ARG1/C3	2
GO:0002449	lymphocyte mediated immunity	4/1930	166/12386	0.000649681	0.0444611	0.0322269	AZGP1/CLU/ARG1/C3	4
GO:0150146	cell junction disassembly	2/1930	16/12386	0.000666361	0.0444611	0.0322269	C3/DKK1	2

## Sheet: matchAFB1andAFB1+BEN
ID	Description	GeneRatio	BgRatio	pvalue	p.adjust	qvalue	geneID	Count
GO:0044282	small molecule catabolic process	53/1058	315/12386	1.19179e+08	0.00573966	0.00550105	BCKDHB/AIG1/ALDH6A1/INPP5A/ABAT/INPP4B/DDAH1/KYNU/PAH/FUT8/ACACB/GALM/SULT1B1/XYLB/HIBCH/SLC27A2/SHMT1/SCARB1/GLS2/BDH2/ACAT2/ALDH3B1/RBKS/GLDC/FUT10/UPP1/LRP5/SULT1E1/AKR1D1/HYKK/XDH/HAL/ALDH1L1/MAT1A/CROT/HOGA1/CRYM/CYP27A1/SARDH/SULT2A1/GK/APOBEC1/CDA/APOBEC2/AGXT2/OXCT2/ACAD11/DAO/CDO1/ABHD1/MTHFS/CPT1C/CYP26B1	53
GO:0007186	G protein-coupled receptor signaling pathway	59/1058	392/12386	1.17311e+09	0.0225442	0.021607	GNG4/CACNA1D/GRK5/PLCE1/ADGRD1/INSR/ADCY9/GPR39/RNF157/SORL1/HRH1/LTB4R/PDE3A/IGF2R/PDE3B/ADGRA3/SSTR3/PREX1/ADGRG5/ABCA1/ADCY1/GPR160/LPAR1/PIK3CB/P2RY11/LTB4R2/GPR3/GPBAR1/CA2/CDK5R1/GPR176/ADGRB2/LHB/ARRDC3/PDE6G/ADGRF1/RASD1/GABBR1/APLP1/ANXA1/ADM/S1PR3/GRK7/GAL/GPR179/GPR65/GAST/GPR199P/CXCR4/AKAP12/UCN/RRH/LGR5/CGB7/ADGRF5/NPR1/GNAI1/CCR3/HTR2C	59
GO:1901615	organic hydroxy compound metabolic process	61/1058	412/12386	1.40433e+08	0.0225442	0.021607	INPP5A/LGMN/ABAT/MAOA/MOGAT2/INPP4B/RXRA/PAH/SLC16A10/SULT1B1/MAOB/HRH1/SLC27A2/SCARB1/ALDH3B1/ITPK1/AOC2/ABCA1/LRP5/SNAI1/SULT1E1/AKR1D1/DDC/SPTLC3/CD244/ASAH2/PCSK9/IDH1/FAXDC2/DGAT2/SOAT2/CRYM/IDI2/CYP27A1/TTC39B/SLC1A1/FMO5/SULT2A1/GK/LIMA1/CFTR/NR4A2/LCAT/OSBPL1A/GPD1/TNF/ITPKA/DHRS9/NR1H4/RPE65/CYP8B1/DEGS2/LRTOMT/DAO/CYP1B1/NR0B2/APOBR/CYP26B1/DIO1/NPR1/CYP11A1	61
GO:0010876	lipid localization	51/1058	335/12386	3.34576e+09	0.0306572	0.0293827	GRAMD1B/ATP9A/RXRA/ABCC4/ACACB/ATP8A1/MSR1/ABCA3/ATP11A/SLC27A2/SCARB1/SLCO1A2/TEX2/MAP2K6/DENND5B/CRY2/FABP2/ABCA1/ANO6/SLC10A2/PCSK9/CDS1/GDF9/DGAT2/SOAT2/CROT/ATP10B/TTC39B/GPS2/NKX3-1/SPX/PLA2R1/LIMA1/ZC3H12A/CFTR/LCAT/OSBPL1A/TNF/PROCA1/PLA2G4C/ANXA1/ABCG4/GAL/CYP8B1/FABP6/ABCA10/MYB/NR0B2/APOBR/APOL4/XKR7	51
GO:0009991	response to extracellular stimulus	58/1058	401/12386	4.5214e+09	0.0306572	0.0293827	BCKDHB/TMEM135/PMAIP1/KYNU/MGMT/GHR/NCOA1/FOSL1/ASS1/ACACB/MAP3K5/AIF1/BMP8A/SORL1/WDR45/BMPR2/RRAGD/UGT1A1/SSTR3/SLC25A25/PHEX/ABCA1/UPP1/F7/ATF3/PEMT/PCSK9/CPS1/GAS6/ERCC1/PKLR/LTA/CDKN2B/GATA4/G6PC1/KCNB1/VDR/SPX/GDF15/ZC3H12A/CDKN2D/NR4A2/SIRT6/RNF152/ADM/MMP7/NR1H4/CYP8B1/JUN/TNC/GAST/MAP1LC3B2/FES/GABARAP/PTGS2/UCN/CYP26B1/HTR2C	58
GO:0006584	catecholamine metabolic process	11/1058	33/12386	5.57899e+09	0.0306572	0.0293827	ABAT/MAOA/PAH/MAOB/AOC2/DDC/SLC1A1/NR4A2/LRTOMT/DAO/NPR1	11
GO:0009712	catechol-containing compound metabolic process	11/1058	33/12386	5.57899e+09	0.0306572	0.0293827	ABAT/MAOA/PAH/MAOB/AOC2/DDC/SLC1A1/NR4A2/LRTOMT/DAO/NPR1	11
GO:0015850	organic hydroxy compound transport	33/1058	189/12386	5.73425e+09	0.0306572	0.0293827	GRAMD1B/ABAT/SLC5A11/SLC5A1/RXRA/ABCC4/SLC2A13/MSR1/ABCA3/MAOB/SCARB1/SYT2/SLCO1A2/SLC5A12/ABCA1/DTNBP1/SLC10A2/PCSK9/SOAT2/TTC39B/GPS2/KCNB1/LIMA1/CFTR/LCAT/OSBPL1A/SYT13/ABCG4/GAL/CYP8B1/MYB/NR0B2/ASIC3	33
GO:0031667	response to nutrient levels	55/1058	379/12386	6.46103e+09	0.0306572	0.0293827	BCKDHB/TMEM135/PMAIP1/KYNU/MGMT/GHR/NCOA1/ASS1/ACACB/MAP3K5/BMP8A/SORL1/WDR45/BMPR2/RRAGD/UGT1A1/SSTR3/SLC25A25/PHEX/ABCA1/UPP1/F7/ATF3/PEMT/PCSK9/CPS1/GAS6/ERCC1/PKLR/LTA/CDKN2B/GATA4/G6PC1/KCNB1/VDR/SPX/GDF15/ZC3H12A/CDKN2D/SIRT6/RNF152/ADM/MMP7/NR1H4/CYP8B1/JUN/TNC/GAST/MAP1LC3B2/FES/GABARAP/PTGS2/UCN/CYP26B1/HTR2C	55
GO:0016125	sterol metabolic process	25/1058	128/12386	7.00227e+09	0.0306572	0.0293827	RXRA/SCARB1/ABCA1/LRP5/AKR1D1/PCSK9/FAXDC2/DGAT2/SOAT2/IDI2/CYP27A1/TTC39B/FMO5/SULT2A1/LIMA1/CFTR/LCAT/OSBPL1A/NR1H4/CYP8B1/CYP1B1/NR0B2/APOBR/CYP26B1/CYP11A1	25
GO:0006869	lipid transport	45/1058	294/12386	8.40149e+09	0.033718	0.0323163	GRAMD1B/ATP9A/RXRA/ABCC4/ATP8A1/MSR1/ABCA3/ATP11A/SLC27A2/SCARB1/SLCO1A2/TEX2/MAP2K6/DENND5B/CRY2/FABP2/ABCA1/ANO6/SLC10A2/PCSK9/GDF9/SOAT2/CROT/ATP10B/TTC39B/GPS2/NKX3-1/SPX/PLA2R1/LIMA1/CFTR/LCAT/OSBPL1A/PROCA1/ANXA1/ABCG4/GAL/CYP8B1/FABP6/ABCA10/MYB/NR0B2/APOBR/APOL4/XKR7	45
GO:0046395	carboxylic acid catabolic process	34/1058	204/12386	0.000115818	0.0398414	0.0381851	BCKDHB/AIG1/ALDH6A1/ABAT/DDAH1/KYNU/PAH/ACACB/XYLB/HIBCH/SLC27A2/SHMT1/GLS2/BDH2/ACAT2/GLDC/AKR1D1/HYKK/HAL/ALDH1L1/MAT1A/CROT/HOGA1/CRYM/SARDH/SULT2A1/AGXT2/ACAD11/DAO/CDO1/ABHD1/MTHFS/CPT1C/CYP26B1	34
GO:0009308	amine metabolic process	18/1058	81/12386	0.00013002	0.0417451	0.0400097	ABAT/MAOA/KYNU/PAH/SULT1B1/MAOB/SLC7A7/AOC2/SLC44A1/DDC/AOC3/SLC1A1/NR4A2/NR1H4/LRTOMT/DAO/OAZ3/NPR1	18
