# Supplementary material for: Does Bentonite Cause Cytotoxic and Whole-Transcriptomic Adverse Effects in Enterocytes When Used to Reduce Aflatoxin B1 Exposure?
Source: Toxins (Basel). 2022 Jun 26;14(7):435. doi: 10.3390/toxins14070435 (PMC9322703; doi:10.3390/toxins14070435)
Supplement: Supplementary file 1 [file toxins-14-00435-s001.zip › Mucignat & Bassan - SplOnline Table S5 KEGG enrichment analysis.xlsx]

## Sheet: AFB1
ID	Description	GeneRatio	BgRatio	pvalue	p.adjust	qvalue	geneID	Count
hsa04080	Neuroactive ligand-receptor interaction	67/2012	119/5711	1.70622e+08	0.000564759	0.000486722	51083/56413/1241/146/5032/3269/2901/7349/1132/133/3972/2796/10161/1903/339403/6865/134/2550/57053/6869/3814/3358/9170/4295/2564/728/4828/2900/5746/2894/2690/2898/1139/7068/56288/1134/1135/5618/114131/6753/130574/2904/1902/2797/2555/9568/3953/1813/7442/1143/3352/5745/1137/2557/2908/7067/100506013/84634/799/140/1131/8862/2905/1910/727/183/6751	67
hsa04151	PI3K-Akt signaling pathway	117/2012	251/5711	9.54793e+09	0.0158018	0.0136184	3442/1440/29941/8515/4804/1969/8817/2260/10161/9134/3164/117145/3673/7533/7157/7099/7057/5526/6446/2787/54541/4515/6199/3320/200186/1298/51764/3674/8517/9170/8503/3371/11140/3561/374/3918/4170/92579/898/2690/9223/5578/284/2066/2786/57521/3480/5523/2538/6256/3694/7039/5618/5521/3717/4602/5105/3643/7097/3381/1902/2263/1101/56034/1950/3693/1956/1287/5747/64764/118788/23239/2792/23678/7450/5291/3680/…	117
hsa04976	Bile secretion	34/2012	59/5711	0.000342818	0.0316513	0.0272778	54658/5243/760/6548/482/361/111/107/10257/6554/115/6579/6256/6555/6523/949/1581/6822/57835/79799/1576/8431/7367/1080/1244/6550/358/109/57552/123264/9971/481/7365/476	34
hsa04725	Cholinergic synapse	41/2012	75/5711	0.000411561	0.0316513	0.0272778	1132/5582/3770/2770/2787/43/51764/8503/3760/776/111/5578/107/3709/115/1139/2786/23236/817/3784/3708/3717/2776/64764/2792/5291/1143/2788/1137/596/2767/2534/1131/55970/2782/109/10681/2784/5293/9586/5295	41
hsa03320	PPAR signaling pathway	34/2012	60/5711	0.000526297	0.0316513	0.0272778	4312/126129/1376/4973/336/5346/10580/1582/6256/2169/2172/5105/11001/2180/1581/8310/79966/1593/3158/2710/376497/2182/1622/8309/1374/6319/5468/10873/364/5106/345/30/5467/5465	34
hsa04727	GABAergic synapse	33/2012	58/5711	0.00057374	0.0316513	0.0272778	9001/5582/2550/2770/2787/6540/51764/54407/11337/2564/776/111/5578/107/10243/18/115/2786/2555/9568/27165/2792/92745/2788/6714/2557/10991/55970/2782/109/10681/2784/2571	33
hsa04724	Glutamatergic synapse	42/2012	79/5711	0.000763074	0.0332152	0.0286256	2901/8605/5582/57030/2770/2787/51764/54407/5338/2900/3760/776/111/2898/5578/22941/107/3709/5321/115/2786/23236/3708/123745/2904/5530/2776/157/27165/2792/5337/2788/85358/6505/10991/55970/9455/2782/109/2905/10681/2784	42
hsa00650	Butanoate metabolism	16/2012	23/5711	0.000820318	0.0332152	0.0286256	123876/18/348158/64064/3033/65985/56898/79944/3158/622/39/6296/116285/38/7915/2571	16
hsa04060	Cytokine-cytokine receptor interaction	63/2012	129/5711	0.000903133	0.0332152	0.0286256	3442/4838/7124/4049/1440/51561/10673/3567/8744/2661/3589/84957/9518/4804/23529/7852/8793/51330/10148/392255/26525/6347/6360/10913/268/3592/115650/1489/8792/3588/3561/1232/84818/8795/2690/7292/1896/56300/53832/353500/8743/8995/5618/656/659/1524/130399/657/3953/57007/6375/53342/90/56477/9466/6359/83729/3570/1230/6358/2056/1436/3600	63
hsa05330	Allograft rejection	11/2012	14/5711	0.00116289	0.0382592	0.0329727	7124/3567/3112/3109/3108/3133/3592/3105/3135/3106/942	11
hsa05032	Morphine addiction	32/2012	58/5711	0.00141053	0.0382592	0.0329727	134/5582/2550/2770/2787/51764/2564/3760/111/5578/107/115/2786/5139/2869/5140/50940/2555/9568/157/10846/2792/5151/2788/2557/55970/5141/2782/109/408/10681/2784	32
hsa04514	Cell adhesion molecules	42/2012	81/5711	0.00147232	0.0382592	0.0329727	9080/6404/3897/1003/6693/90952/4359/3112/29126/3109/3108/64115/3133/54413/83700/9074/3383/6385/3105/3135/3106/942/1002/5797/4756/6383/214/4897/9369/10686/83692/149461/3680/26047/926/5792/3696/3684/2734/3689/9019/6382	42
hsa04940	Type I diabetes mellitus	14/2012	20/5711	0.00160741	0.0382592	0.0329727	7124/4049/3112/3109/3108/3133/3592/3105/3135/3106/942/5799/3382/2571	14
hsa04512	ECM-receptor interaction	34/2012	63/5711	0.00168786	0.0382592	0.0329727	8515/51206/9900/3673/7057/1298/3674/6385/3371/3918/9899/80144/3694/3381/1101/3693/1287/7450/3680/3672/255743/1293/1282/3696/3339/375790/2335/3909/7148/1280/3690/3912/284217/6382	34
hsa05204	Chemical carcinogenesis - DNA adducts	25/2012	43/5711	0.0017338	0.0382592	0.0329727	54658/1543/1545/5743/653689/1577/9/119391/2953/2938/1557/1571/2948/6822/79799/1646/1576/2939/7367/2944/1558/873/4259/9446/7365	25

## Sheet: AFB1+BEN
ID	Description	GeneRatio	BgRatio	pvalue	p.adjust	qvalue	geneID	Count
hsa05322	Systemic lupus erythematosus	22/576	58/5708	1410000	444000000	413000000	8364/8336/7124/8362/8339/8367/440689/8345/8365/8356/733/8329/8353/8344/8349/942/8357/121504/8341/3012/8347/715	22
hsa05034	Alcoholism	29/576	113/5708	140000000	0.000220189	0.000204553	4128/53358/2786/1644/4129/64764/84254/8364/8336/8362/2354/8339/8367/440689/8345/8365/8356/8329/2770/163688/8353/8344/8349/8357/121504/8341/3012/6464/8347	29
hsa04060	Cytokine-cytokine receptor interaction	29/576	129/5708	2310000000	0.00243062	0.00225802	7292/2690/8743/353500/5618/656/3455/9466/657/659/1440/3442/7124/4049/2661/51561/3567/3589/4804/392255/10913/3569/7852/10673/8744/9518/26525/1232/3625	29
hsa04080	Neuroactive ligand-receptor interaction	27/576	119/5708	3720000000	0.00292648	0.00271867	6755/6753/7068/2690/5618/1134/1902/2557/2555/2797/2898/2901/7349/1903/51083/3358/56413/4922/2550/3269/2796/1241/133/3972/5032/10888/90226	27
hsa00360	Phenylalanine metabolism	7/576	12/5708	5180000000	0.003262	0.00303036	4128/5053/1644/4129/221/8639/314	7
hsa04976	Bile secretion	16/576	59/5708	0.000164642	0.00805232	0.00748052	8431/10257/107/6555/6256/115/9971/6579/1080/6822/949/6523/79799/54658/570/760	16
hsa00260	Glycine, serine and threonine metabolism	11/576	32/5708	0.00017894	0.00805232	0.00748052	1757/4128/4129/2731/64902/1610/6470/2593/8639/314/5224	11
hsa04913	Ovarian steroidogenesis	12/576	39/5708	0.000300827	0.0118451	0.0110039	107/3283/115/3643/123745/949/1583/240/5743/1545/8605/3972	12
hsa04015	Rap1 signaling pathway	30/576	160/5708	0.000542225	0.0189779	0.0176302	51466/51196/23094/107/50855/115/1902/3643/56034/7410/84552/9771/5909/57121/83660/9223/5291/8631/260425/5608/26037/9965/2770/2260/163688/4804/54518/8817/3674/57568	30
hsa04613	Neutrophil extracellular trap formation	22/576	111/5708	0.00138093	0.0434994	0.0404104	7097/5291/8364/8336/8362/8339/8367/440689/8345/8365/6404/8356/8329/8353/8344/8349/8357/121504/8341/3012/3674/8347	22
