# Supplementary material for: Does Bentonite Cause Cytotoxic and Whole-Transcriptomic Adverse Effects in Enterocytes When Used to Reduce Aflatoxin B1 Exposure?
Source: Toxins (Basel). 2022 Jun 26;14(7):435. doi: 10.3390/toxins14070435 (PMC9322703; doi:10.3390/toxins14070435)
Supplement: Supplementary file 1 [file toxins-14-00435-s001.zip › Mucignat & Bassan - SplOnline Table S6 GO GSEA Gene Set Enrichment Analysis.xlsx]

## Sheet: AFB1
ID	Description	setSize	enrichmentScore	NES	pvalue	p.adjust	qvalues	rank	leading_edge	core_enrichment
GO:0000723	telomere maintenance	122	0.205998	20818572119471	0.00151154	0.0181417	0.0141724	3187	tags=39%, list=22%, signal=31%	55505/55135/54386/9134/908/6950/2067/5111/10694/220064/24144/5514/7014/3320/26354/23049/675/2072/3326/3364/51548/22948/10576/3104/54552/80169/10574/7203/6119/898/80351/1736/545/6118/11284/5394/23381/4609/85456/167227/79991/10039/55226/3192/170506/64858/5976/7517
GO:0001678	cellular glucose homeostasis	128	-0.190636	-19274457636501	0.00391854	0.0343056	0.0267997	3107	tags=38%, list=21%, signal=30%	51085/5566/28999/7776/9971/4976/6597/5467/55638/57539/5105/5106/133308/6717/55450/2308/55107/64710/1080/2309/3745/5799/7494/10497/3480/5530/252983/5165/7447/65985/91942/9324/2822/4041/111/4035/221937/25874/8398/2621/55144/7074/9024/8609/26056/23516/5581/2626
GO:0001822	kidney development	227	-0.16587	-200848204494594	0.000812487	0.0119702	0.00935119	5325	tags=48%, list=36%, signal=31%	3913/56913/3675/5310/5914/596/1063/6569/23371/23213/4086/139285/26508/4357/57216/5159/5420/2043/650/7704/11064/168002/23322/163/7541/387/54806/2297/5175/171023/7482/10413/157506/3248/55366/2719/4208/1636/162/284/282679/28999/7849/6382/8642/84159/80000/7380/25937/7466/4087/639/10972/4091/8879/221322/26108/3570/8100/5915/7490/7481/5754/5727/10758/26146/1739/4036/2066/2131/51196/80144/5087/5125/445/…
GO:0002181	cytoplasmic translation	143	0.363805	385200822912753	17.4455	5113.38	3994.59	5989	tags=71%, list=41%, signal=43%	56339/6173/8531/24140/5936/8664/51372/1983/1802/8669/8668/55854/6124/6207/8662/1801/7311/1981/2107/6136/28985/285381/6229/51121/6233/6144/6152/8894/6204/9045/8562/1973/54505/6222/51389/6133/6206/6189/6218/221662/6156/6155/170506/6161/6157/7555/6138/6143/23521/6154/6167/6176/51441/6147/3921/6210/1660/6227/2935/92715/11224/6235/6191/6201/6169/6128/2332/6142/6208/6228/6217/6175/6168/7458/79727/6171/…
GO:0002418	immune response to tumor cell	15	0.512258	221373272283242	0.00127386	0.0159061	0.0124259	3408	tags=67%, list=23%, signal=51%	81545/3105/100507436/634/196/29126/3146/8751/84868/3592
GO:0002433	immune response-regulating cell surface receptor signaling pathway involved in phagocytosis	20	-0.478401	-233530329131344	0.000325155	0.00601591	0.00469965	5250	tags=80%, list=36%, signal=51%	6850/3984/7525/55198/25/5906/10451/2534/7410/5795/5747/6714/4067/8398/5058/5581
GO:0002544	chronic inflammatory response	11	0.544458	202040428348352	0.00254877	0.0260442	0.0203458	4198	tags=82%, list=29%, signal=58%	4049/7057/7128/7124/9536/6280/201294/8876/50943
GO:0003012	muscle system process	276	-0.152589	-192113303597551	0.00181931	0.020677	0.0161529	5476	tags=48%, list=37%, signal=31%	2775/5290/6261/2946/8082/54795/127294/1131/1908/3600/3162/9456/23213/7168/490/5152/8913/142/1813/6093/4205/7871/9150/29119/5606/9732/2593/7111/10398/7134/808/3760/29995/100/387/140465/3352/10611/5025/3784/6416/219931/7222/2934/3757/4636/5566/28999/9722/10087/801/22876/84676/80005/5465/7423/6640/55151/1938/8736/1134/1910/2258/9826/6546/6717/2308/476/1756/11214/274/7528/2627/1837/2309/1605/340481/1…
GO:0003013	circulatory system process	387	-0.196896	-273385270148204	13901.1	1.72033e+08	1.34393e+08	6394	tags=58%, list=44%, signal=34%	2643/2697/6781/81031/7042/6542/5020/9283/522/8912/206338/84879/2149/28514/57419/51738/6196/112/6509/5138/80852/79041/57085/10135/140/2642/6901/79191/3177/83988/2775/5290/2946/57731/54795/143282/1131/1908/6720/3162/7168/490/66002/91608/4881/8913/6648/20/10057/6582/1813/6093/4205/2153/4037/8671/7531/2056/27345/10659/29119/128/5029/5606/9732/55636/79987/2013/7134/27134/808/50848/3760/100/8862/91807/…
GO:0003382	epithelial cell morphogenesis	30	-0.437644	-253347550559838	6.55462e+08	0.00181605	0.00141871	6465	tags=87%, list=44%, signal=49%	10653/4233/6781/3209/1365/2195/64102/3549/23022/168002/57669/80781/367/25932/64919/6768/196383/353116/79977/57111/23094/5314/2317/57493/26084/440193
GO:0006081	cellular aldehyde metabolic process	50	-0.270032	-194099805828789	0.00627774	0.0475166	0.0371201	7048	tags=74%, list=48%, signal=39%	53630/1181/81888/189/654/8912/224/7167/57026/9380/147015/27122/83875/3418/8574/650/128/3029/5978/157506/55163/132158/223/64902/6121/7086/8644/1645/8566/10327/25953/221/501/3417/216/2098/112817
GO:0006352	DNA-templated transcription, initiation	106	0.296611	285848210963293	3.11616e+07	0.00015921	0.000124376	2950	tags=44%, list=20%, signal=36%	23064/2960/8367/6883/7019/284119/5706/2959/7157/2067/51616/6877/5433/6884/54700/8061/6908/2071/9013/6722/1025/9774/8365/5436/55290/221830/55011/9329/1810/8362/6881/3725/8467/64216/8364/3146/7343/2958/9968/9519/6878/9969/9441/6879/9440/6880/170506
GO:0006364	rRNA processing	220	0.432058	524738959651851	3.15871e-16	5.86362e-13	4.58068e-13	5888	tags=78%, list=40%, signal=48%	10436/55505/84365/23481/51154/55695/9277/112479/22894/64963/55299/9775/317781/51602/84135/705/27341/22984/65083/54853/11056/54606/23404/84916/84549/23560/55035/84128/9188/57050/5036/27042/10969/10813/117246/285855/55646/55781/55661/114049/65095/54663/3669/10528/161424/55720/55813/9221/51119/56342/113510/10199/51729/51367/84294/10360/29777/51575/155400/79707/57602/83732/51547/51077/55178/81887/550…
GO:0006401	RNA catabolic process	253	0.224311	283728829984823	1.74046e+06	2.05032e+08	1.60172e+08	4888	tags=51%, list=33%, signal=35%	6741/56339/8531/90806/9567/10921/9238/51154/54915/55181/22894/9775/9939/65080/6832/23404/1655/246243/54855/9704/2521/8882/5433/85441/54888/3669/23049/8761/55603/5511/80149/22916/55629/54542/65109/55596/79072/115572/2107/5436/23658/10984/4116/53918/677/79675/25804/8313/201626/9125/9513/154197/51690/6041/4615/79670/25819/1736/340152/60493/55795/23644/27257/51010/10922/65110/23435/7538/5394/23381/64…
GO:0006403	RNA localization	183	0.28327	328318563048692	73913	1.47008e+07	1.14843e+06	5205	tags=60%, list=35%, signal=39%	6741/79228/55505/53371/7884/55135/55421/908/6950/9775/10694/51602/9939/65083/9818/6830/6432/7919/23404/5901/5433/54888/10762/10482/23049/26097/23511/91746/2733/22916/1984/65109/5903/8480/11097/23279/100101267/22948/29890/10576/26993/55011/4116/8106/8888/677/10574/11052/55308/7514/84248/7203/56648/7248/24148/55916/6426/10212/1736/55795/25909/51010/9326/545/65110/10189/7538/5394/23381/167227/3192/1…
GO:0006417	regulation of translation	362	0.178689	252030776381754	1.95112e+08	0.000107582	8.40434e+09	4963	tags=47%, list=34%, signal=32%	56339/8531/84919/5936/3673/8664/55695/54915/22894/6059/51123/9775/7057/9939/26164/8890/54931/1983/7919/1802/23404/5433/55323/5036/8507/1965/9221/149986/8892/8662/1982/51247/80149/2733/22916/1984/54542/65109/60558/1801/79072/1981/2107/8569/5436/6199/4116/53918/7124/677/285381/5935/201626/9125/9513/26046/56648/7248/51250/708/154197/90850/84769/79670/5187/6198/25819/11236/340152/92170/127933/9470/27…
GO:0006457	protein folding	174	0.22315	252435888143675	4.31316e+08	0.000207069	0.000161763	4123	tags=45%, list=28%, signal=33%	81572/5204/6782/51645/55664/9141/908/6950/3301/1861/3313/10598/10694/6903/27348/130872/3300/573/80273/3320/51182/10549/26973/27000/10808/567/6905/7411/10190/27433/11140/6102/3306/5903/3326/219899/22948/169714/10576/79982/56605/9529/10726/11080/10574/9526/7203/55898/51726/23275/1191/972/10450/57003/6388/7266/51364/134266/1047/23184/5479/3337/1676/25822/9360/9532/2281/5202/55466/9531/2288/9403/4820…
GO:0006470	protein dephosphorylation	232	-0.182502	-221449857633529	0.00010846	0.00261478	0.00204268	6002	tags=54%, list=41%, signal=32%	54866/55631/138639/8073/52/5500/8776/57026/26469/23399/5532/58190/3071/23035/2280/79660/596/2140/5787/9562/7184/23371/29101/5494/5781/4534/1033/5524/2029/5159/5774/84687/1813/6093/7531/9150/9829/5789/11099/92235/54434/5725/55197/5802/132160/808/5518/9891/64419/57718/55291/7803/11156/28227/57181/10106/5501/5784/5533/3551/51496/55844/57223/801/5495/56940/142679/5728/57546/5771/8897/5528/5525/5775/8…
GO:0006575	cellular modified amino acid metabolic process	148	-0.221903	-236397656249689	8.94982e+08	0.00226175	0.00176689	6491	tags=61%, list=44%, signal=35%	5359/2729/5447/2643/6472/883/373156/200895/84879/5352/23659/2806/34/2678/129642/1497/256987/2946/114879/5625/87769/1800/160428/2937/53405/1733/10588/4258/2944/2593/25974/2879/3029/191/2936/51449/3249/81490/223/2941/25902/8875/7849/10162/6573/376497/23474/51268/114882/1719/1384/55349/50506/2954/2939/1374/4522/154141/445/10404/9791/117247/8424/27284/6470/114884/2948/1152/26090/501/2628/7038/6583/10…
GO:0006691	leukotriene metabolic process	18	-0.456679	-212362029791476	0.00304648	0.0296606	0.023171	5633	tags=89%, list=38%, signal=55%	240/2678/6850/1800/66002/9261/4258/8529/22949/5321/4051/4048/4363/7097/241/4259
GO:0006694	steroid biosynthetic process	137	-0.240435	-249331262848713	2.57021e+09	0.000888191	0.000693858	6768	tags=66%, list=46%, signal=36%	10998/335/4597/2264/654/1588/79798/5447/1109/8912/1066/5563/5825/1609/93517/9619/570/10005/134429/7923/2672/6720/9965/27122/51478/80270/337/79644/1581/7108/64801/23600/650/10654/22937/1576/114883/6713/2224/1594/47/5978/4790/4598/2222/51360/3157/3930/10162/9885/1582/9971/10613/1586/11161/51422/8720/8644/1718/3283/79154/10682/114880/114876/1727/476/6342/51144/1080/29881/9563/2230/51170/4047/50814/6…
GO:0006699	bile acid biosynthetic process	30	-0.348252	-201599372315195	0.00348659	0.032094	0.0250719	6768	tags=83%, list=46%, signal=45%	3028/10998/2264/1109/1066/5825/570/10005/134429/9965/80270/1581/23600/114883/9885/1582/9971/114880/114876/6342/340895/11001/6718/26031/1593
GO:0006766	vitamin metabolic process	90	-0.23221	-206640100308982	0.00168339	0.0194902	0.0152259	4314	tags=48%, list=29%, signal=34%	10588/1576/25974/1594/55312/8529/4790/157506/29968/4548/54905/55163/9227/8875/6573/6121/6513/5467/8644/113278/4051/1719/9963/5948/8566/10327/873/4363/4036/27010/56922/3141/171425/80704/9962/6470/326625/154807/686/9446/1593/9104/55788
GO:0006790	sulfur compound metabolic process	278	-0.215276	-272327409114497	1.93721e+07	1.34854e+09	1.05349e+09	6020	tags=58%, list=41%, signal=35%	6667/55790/6820/64210/641371/26027/9054/57678/5166/58478/2678/79586/570/10005/1497/22901/9200/2946/116285/23553/51703/23305/6483/2181/122970/9469/1800/254552/11041/122961/2937/4357/1738/53405/3295/6611/4258/10654/29940/2944/9645/6817/25974/2879/47/1491/3029/191/64579/2936/4598/22856/4548/58472/3157/9524/348158/2941/123876/55501/11046/23181/284/64132/79625/7849/4594/5164/6576/54928/1312/23474/5107…
GO:0006814	sodium ion transport	162	-0.266089	-289766485583366	1.92865e+07	1.34854e+09	1.05349e+09	5431	tags=57%, list=37%, signal=37%	6339/347051/284111/375/57731/54795/124565/150159/57520/142680/6569/286183/8913/9058/340024/5774/53373/1813/7871/5349/8671/128414/5652/9497/5025/3784/10479/6335/29099/65125/219931/64078/10916/6584/41/81/6550/6526/6640/11261/9963/2258/133308/6546/6568/476/6554/57835/1756/1785/10050/1739/481/6523/115584/817/23327/200010/154043/9962/145389/6532/6334/84068/288/9498/159963/357/91749/150684/196527/6549/…
GO:0006816	calcium ion transport	251	-0.185338	-230936671899439	2.18235e+09	0.000769208	0.000600908	5476	tags=50%, list=37%, signal=32%	2775/7779/6261/2280/84876/2946/2859/54795/5371/5310/596/799/56704/9456/1020/1729/490/8913/2904/5159/53373/1813/2905/409/7531/2056/117155/54822/27032/159371/55636/221154/54836/1594/808/387/6271/3710/5025/91404/84766/168507/1137/10681/219931/8065/7222/1139/9455/25/1230/5566/56848/57338/9722/2147/6375/825/801/41/9474/7466/4976/63933/55151/5170/26133/22821/5663/91689/6546/6717/27075/1756/140738/3958/…
GO:0006869	lipid transport	294	-0.212467	-274427523833551	1.25013e+07	9.94566e+08	7.7696e+08	5065	tags=63%, list=35%, signal=42%	55113/10998/335/51024/388323/2170/654/1588/6845/10999/5359/7357/1109/65977/5020/522/1056/1066/84879/80830/2806/5825/51738/302/23673/114571/51761/5104/347/55207/9619/347051/134429/10347/6850/51703/2181/114879/7274/5306/5781/81537/50636/80148/286046/2055/20/337/950/1581/1813/58488/55754/8660/64801/83394/10062/389668/8322/200931/208/114883/118987/51054/3690/8431/788/57614/55102/8529/57488/79895/4790…
GO:0006873	cellular ion homeostasis	412	-0.182671	-25665080859246	1.13062e+07	9.25942e+08	7.2335e+08	5470	tags=50%, list=37%, signal=33%	7779/4494/6261/23557/2280/375/2946/2859/54795/55177/8614/5371/5310/596/1908/799/150159/56704/283375/144811/142680/6569/169200/7274/7184/205251/3162/1020/1729/490/65010/6556/2904/1524/53373/1813/9114/2905/8671/7531/2056/27020/54822/23682/27032/5029/159371/55636/118987/221154/1318/6358/653519/808/9497/10989/3710/5025/3784/10463/10479/7782/535/57181/83636/219931/538/7222/7018/2495/523/1139/25/25932/…
GO:0006897	endocytosis	433	-0.158111	-223028517245749	1.77307e+09	0.000671714	0.000524746	4781	tags=43%, list=33%, signal=30%	722/257364/286046/20/950/636/4908/284697/53373/1813/54874/6093/4037/71/409/9938/7249/88455/9829/10062/389668/8909/57720/9261/5289/112574/7448/6643/26130/3690/163/6642/808/54497/8862/1455/5861/2885/54806/57488/94134/80230/90678/1759/4627/432/132299/10188/2719/1456/197/6311/219931/23221/6455/7018/5533/3689/51429/55198/2934/7436/25/2580/1755/718/10043/50618/284/26985/115548/345/27131/23208/7879/4040…
GO:0006913	nucleocytoplasmic transport	267	0.189955	245927639567672	3.46075e+08	0.00017208	0.000134429	3795	tags=40%, list=26%, signal=31%	6741/79228/5936/53371/26953/9670/7157/6059/55696/3313/10553/65083/9818/2316/6830/7919/5514/5901/8882/5433/27351/1408/54888/55781/10762/3838/161424/10482/9221/55341/23049/26097/51068/23511/91746/6469/80149/2733/22916/65109/5903/8480/30000/11097/3326/23279/3840/100101267/1026/29890/2810/51547/129138/55374/26993/8106/2010/8888/10155/11052/4000/55308/7514/84248/55153/7248/55705/55916/84946/10212/1131…
GO:0006997	nucleus organization	116	0.186204	186480763329447	0.00554731	0.043703	0.0341409	3466	tags=39%, list=24%, signal=30%	10436/53371/55135/81565/79188/29082/1861/10269/27348/23411/84942/91782/8882/51510/57132/10208/9221/23141/79607/27243/1760/57602/26993/2010/23378/4000/80346/23306/8467/5339/25909/26092/90780/9519/23435/23760/7536/25978/1639/27183/7110/5347/81929/9525/7175
GO:0007005	mitochondrion organization	464	0.117301	175755612527604	0.00309921	0.0298608	0.0233274	5934	tags=47%, list=40%, signal=29%	55154/51499/23203/6993/7019/64429/9141/7157/56270/3313/10730/57805/8678/29078/9001/3155/6832/80025/26073/80273/10440/3320/4700/81631/79680/51103/10531/57103/11152/117145/6548/9140/5366/23593/4715/5329/65991/2931/59286/11140/27166/23761/23130/6834/79072/89781/2810/51025/116228/100131801/1267/10059/57602/51547/10425/1890/285973/617/1347/84883/5245/55572/5716/4000/90639/30968/10449/113115/26521/7285…
GO:0007018	microtubule-based movement	281	-0.148461	-188215875210415	0.00186281	0.021	0.0164053	5687	tags=48%, list=39%, signal=30%	51566/55207/8943/54970/55582/1062/667/5048/22820/23557/66008/92104/9928/83538/55567/92558/118491/23162/150159/166379/1672/374654/161582/10239/57519/23353/23639/23046/118426/636/55605/10013/80173/85413/81930/117155/201625/85478/55112/56992/54820/9787/80208/361/5108/10749/5861/1769/284076/583/79846/5870/4137/79809/23287/3832/113220/10300/2319/26985/3833/79582/84071/24137/4976/9371/80217/55638/9585/…
GO:0007163	establishment or maintenance of cell polarity	188	-0.187205	-216457081017836	0.000565032	0.00933728	0.00729432	2544	tags=33%, list=17%, signal=28%	64083/55691/154796/57698/23122/60/2258/9826/399687/9578/4983/7481/55333/5754/22836/23291/84552/10758/1739/2185/4134/23094/54828/56288/117583/143098/5747/5590/10806/3064/55755/23332/55083/81704/9053/9231/1045/5314/8825/23255/9124/85440/8729/23286/10207/4649/2909/10565/22902/5058/2932/23189/9024/29780/51057/9265/154810/4926/9368/10486/1495/115701
GO:0007169	transmembrane receptor protein tyrosine kinase signaling pathway	458	-0.164336	-237636633639448	1.30022e+08	7.46484e+09	5.83157e+09	6585	tags=57%, list=45%, signal=32%	10999/1979/5296/3485/5829/6776/4909/54741/55704/5155/4233/26060/5156/780/9451/55359/130617/1288/8829/222584/7471/59338/5921/28514/10636/324/51738/9655/1949/4641/1609/3484/26469/347/284656/916/340706/5166/25778/925/10006/51043/5290/7429/10603/10818/6850/143282/4902/64102/5157/58533/3487/6720/5894/23371/9965/7301/23213/5781/1942/57556/1943/6886/2050/4058/5062/5159/4908/5774/1944/8660/23636/1284/625…
GO:0007272	ensheathment of neurons	107	-0.219593	-207680633696308	0.000877617	0.0125641	0.00981515	3268	tags=39%, list=22%, signal=31%	64398/7368/79152/5376/51090/9334/83742/5467/5728/84668/26022/8898/5915/114569/7851/1605/1739/287/10397/56288/81846/4155/23136/8537/8455/163175/7097/6334/55331/53616/152189/9896/443/7038/6497/400746/8604/23175/2475/2064/23191/4763
GO:0007423	sensory organ development	365	-0.133745	-183066078629384	0.00166766	0.0193709	0.0151326	6307	tags=51%, list=43%, signal=30%	22930/7042/5156/780/84287/147912/23347/4901/10312/84879/25861/8829/3985/7471/28514/54903/51343/27077/51761/10427/4211/3209/51176/23513/1270/4647/5048/4613/1497/168667/2195/3913/10818/27443/5914/596/93/283375/6297/25794/6240/5781/3549/490/1050/7431/125488/2055/11145/5159/27152/1813/10370/284217/8322/2043/22803/650/1282/9261/221935/83605/4867/81029/55636/79583/1280/430/7111/23322/9497/25945/54806/2…
GO:0007586	digestion	78	-0.261392	-22013098645045	0.000808743	0.0119467	0.00933277	6862	tags=71%, list=47%, signal=38%	4883/5408/335/79924/5644/5225/7357/5020/1056/55765/51738/7430/7429/1131/1314/5646/65010/337/358/10062/7033/50848/3784/6476/9414/65125/2168/6584/10162/1582/7032/1645/114131/8544/29881/29887/5357/7421/51474/339221/2035/6523/80168/949/6518/57482/64081/2169/48/6718/27347/56624/7442/1646/8435
GO:0007610	behavior	357	-0.146165	-199506552905612	0.000525388	0.00889326	0.00694745	5520	tags=55%, list=38%, signal=35%	79924/6507/28964/7416/1979/8528/92482/4909/338811/2697/9379/1959/5020/54982/84879/27286/8704/23394/64856/10636/51738/7337/285382/1949/51761/4211/3766/5532/8301/8863/5048/2775/1497/2571/590/57731/3675/10347/596/1385/166379/1051/7543/9456/1020/3251/54207/57121/6886/8932/2055/20/2904/1524/4908/84687/1813/409/10919/27020/9975/8322/2043/221935/6801/23259/4867/55636/7111/80208/9698/5108/100/8862/54806/…
GO:0007613	memory	73	-0.249402	-203553443993355	0.00197811	0.0216852	0.0169406	6565	tags=66%, list=45%, signal=37%	1979/4909/338811/5020/8704/23394/10636/5532/1497/3675/10347/1385/1051/54207/1524/4908/1813/10919/4137/3710/9867/4204/1139/7436/57338/23208/41/1312/266977/5728/5663/2258/894/85358/440275/3643/6310/114781/23236/5590/6532/22849/107/23373/8398/143941/2475/6505
GO:0008038	neuron recognition	31	-0.336685	-196587514741881	0.00536901	0.0427143	0.0333686	4570	tags=61%, list=31%, signal=42%	27242/57463/27020/2043/23022/128434/10371/6091/1954/2131/152330/26047/2048/9037/4897/57453/2909/57549/351
GO:0008206	bile acid metabolic process	39	-0.333794	-212914279700659	0.00120771	0.0157144	0.0122761	6768	tags=77%, list=46%, signal=42%	10998/2264/1109/1066/5825/570/10005/134429/9965/80270/1581/64801/23600/114883/9885/1582/9971/114880/1645/114876/2494/5205/6342/30/340895/11001/6718/26031/1593/6822
GO:0008217	regulation of blood pressure	111	-0.245052	-234079182721395	0.000142735	0.00319234	0.00249387	6442	tags=65%, list=44%, signal=37%	5155/2643/2697/5020/9283/522/206338/2149/28514/6196/80852/57085/10135/2642/83988/1908/3162/7168/490/66002/91608/4881/6648/1813/128/2013/50848/8862/387/8529/5331/5025/3784/4204/367/65125/1636/64167/27131/3816/5465/4012/2784/51752/290/1910/55450/476/29953/57835/5345/18/1889/2131/5125/23576/2132/143872/55328/659/6518/4041/27347/6296/2621/7442/7026/59272/5547/183/4088/5468
GO:0008361	regulation of cell size	137	-0.215685	-223665488711605	0.000364062	0.00657642	0.00513752	4878	tags=50%, list=33%, signal=34%	3984/1020/57556/5962/2055/358/6405/6259/4869/114908/8766/25942/361/5802/387/4137/10371/1207/23105/128239/23028/538/10512/10723/25/27185/51520/282679/57609/2803/2784/5728/57698/2258/1808/57715/1954/2335/85358/23499/9856/10451/1185/1785/9990/54437/7410/57521/1002/64798/23108/10507/659/84561/10500/4035/9037/4897/196527/3778/23038/6792/22902/5058/2932/2475/23191/9175/9368
GO:0008366	axon ensheathment	107	-0.219593	-207680633696308	0.000877617	0.0125641	0.00981515	3268	tags=39%, list=22%, signal=31%	64398/7368/79152/5376/51090/9334/83742/5467/5728/84668/26022/8898/5915/114569/7851/1605/1739/287/10397/56288/81846/4155/23136/8537/8455/163175/7097/6334/55331/53616/152189/9896/443/7038/6497/400746/8604/23175/2475/2064/23191/4763
GO:0009100	glycoprotein metabolic process	294	-0.197634	-255269529047744	1.51086e+08	8.49896e+09	6.63942e+09	5582	tags=53%, list=38%, signal=33%	79586/91319/29929/10005/7841/27090/11227/66008/58505/4122/56913/26574/10347/5373/23553/596/51465/9695/27230/6483/3600/9469/6569/4351/11041/23213/3549/5372/20/9514/11093/79644/51172/286148/256281/147991/4125/56886/55768/84892/650/29940/1280/2524/143888/5861/84002/23509/64579/84061/267/2137/81876/79087/29071/8706/5238/22856/201595/84197/2218/538/57134/29954/27161/55501/64132/727936/79625/282679/933…
GO:0009306	protein secretion	267	-0.160963	-202028251903991	0.000347129	0.00631752	0.00493528	5685	tags=50%, list=39%, signal=31%	2746/5532/101/9619/10961/5048/22820/23607/375/54795/5019/8754/3767/27230/201158/27236/4218/51762/94121/6720/5894/5781/3651/9448/2029/6400/51172/84315/1813/8660/80223/3418/10062/4053/93145/55204/79971/5289/5864/8431/3667/387597/5978/9854/9230/64175/84830/6927/374969/51768/5211/9971/84976/5467/4087/55638/64083/10972/27445/55691/8736/5106/9601/133308/399687/6717/114131/55450/9545/5071/283/55107/1080…
GO:0009408	response to heat	84	0.220347	197279160881495	0.00421771	0.0362476	0.0283168	5476	tags=55%, list=37%, signal=35%	3301/7057/8890/23411/100507436/51278/3320/5433/26973/10569/27000/1967/1965/8892/3281/3306/3326/1026/11080/4277/3654/51501/7266/545/56892/10016/3337/170506/4287/27429/5743/7175/55466/9531/94241/6647/3066/9311/7415/2033/10273/3490/5609/844/488/10049
GO:0009410	response to xenobiotic stimulus	345	-0.17466	-236166657758705	3.60655e+08	0.000176183	0.000137635	5338	tags=50%, list=36%, signal=32%	2571/2946/590/3675/5019/116285/5888/596/1063/3767/7013/1385/10555/2052/1800/6569/6720/3162/3651/2937/3309/66002/1789/6648/20/122622/1536/13/84687/1813/10715/4257/10919/6095/891/7515/1555/1576/4860/2944/6817/4535/1571/100/983/387/9049/8529/5978/6281/3784/8412/1503/4862/54905/1573/80781/7976/4208/3157/5009/10512/348158/3757/2941/5378/143/1559/5906/1723/9474/1312/7039/2016/7423/5728/5141/11200/1938/…
GO:0009615	response to virus	267	0.150704	195110361143831	0.000695037	0.0105819	0.00826664	5156	tags=46%, list=35%, signal=30%	329/55421/10623/10269/8678/1543/6609/29078/85364/11040/4953/3925/100507436/7353/9188/3320/3659/29115/3669/8061/5366/84851/80149/1984/661/1147/51561/81844/58487/81559/10621/5970/550/22948/3665/7128/7728/23765/7124/5245/9255/201626/58515/4486/4277/6773/708/55324/1191/8780/3442/6041/4615/3661/63906/200316/581/55763/8372/6895/5683/3159/5600/170506/3588/1654/2150/54541/3373/8517/55337/602/201294/3429/…
GO:0009636	response to toxic substance	189	-0.207504	-24036063651605	3.40584e+09	0.00109637	0.000856486	5650	tags=56%, list=39%, signal=35%	440/2882/5002/7779/4494/84817/2946/5888/596/10587/2052/5292/127281/4357/1789/2984/6648/11093/337/5159/83667/1813/115703/10715/4257/10919/891/10935/128/4258/2944/7001/2879/983/7296/2936/55244/51780/7782/27244/6335/26034/23028/538/2168/10202/6584/83990/6382/23428/5594/5595/146802/25841/57539/1719/9963/9131/5071/50506/213/2954/10249/140803/10327/670/999/2176/4255/445/4155/4519/79813/89872/10516/847/…
GO:0009914	hormone transport	217	-0.153202	-184306490581742	0.00637713	0.0479275	0.0374411	5287	tags=47%, list=36%, signal=31%	54795/5019/1908/3767/27230/1385/51762/94121/6720/5894/5781/3651/91608/9448/2029/6906/1813/8660/80223/8322/55636/8431/3667/387597/8862/5861/2297/5978/9854/3784/9230/8723/6927/4602/51768/8425/7849/5211/23428/6453/9971/5467/4087/55638/27445/5106/133308/6717/114131/55450/5071/55107/1080/5213/9575/2182/1374/3077/3745/114899/5799/18/3033/117247/5530/252983/1956/7447/353500/6934/65985/7260/55512/91942/9…
GO:0009953	dorsal/ventral pattern formation	50	-0.297314	-213709983957691	0.00146723	0.0177738	0.0138849	4575	tags=56%, list=31%, signal=39%	27152/5567/221833/79600/100532736/3169/79176/79809/23432/5566/4087/4091/221322/5663/51098/57728/5727/90/26160/80319/51684/4038/657/79659/57453/25928/58495/6608
GO:0010332	response to gamma radiation	49	0.276719	203430991774123	0.00434129	0.0367326	0.0286957	4733	tags=55%, list=32%, signal=37%	10206/7157/10269/57103/675/1026/123879/5428/3981/2876/4221/581/545/2002/3014/4609/404672/578/6154/598/1535/5423/7516/79073/7520/3265/2074
GO:0010565	regulation of cellular ketone metabolic process	97	-0.22421	-204839911179806	0.000930727	0.013056	0.0101994	4977	tags=52%, list=34%, signal=34%	6720/9965/205251/27122/337/1581/8660/10062/650/22937/208/3667/9926/5978/157506/2168/55198/51085/345/5164/9971/10613/1312/5467/5465/51422/8644/9611/85414/10464/9563/1374/9612/32/5165/340895/83752/3638/9056/5163/23038/493/60481/2475/84649/9104/57761/5581/5468/51141
GO:0010608	posttranscriptional regulation of gene expression	483	0.184229	279760166329434	141546	2.38869e+07	1.86605e+07	4884	tags=47%, list=33%, signal=33%	56339/8531/84919/90806/5936/84872/3673/8664/9238/55695/7157/54915/22894/6059/10269/51123/9775/7057/9939/26164/8890/10978/54931/1983/7919/1802/23404/1655/5901/51593/54855/79753/2521/84981/5433/55323/5036/144233/54888/8507/1965/9221/149986/8761/8892/84962/8662/55603/1982/51247/91746/11140/80149/2733/22916/1984/54542/65109/60558/1801/79072/1981/115572/2107/8569/5436/6199/10984/4116/53918/7124/677/28…
GO:0010742	macrophage derived foam cell differentiation	25	-0.41576	-220855919479285	0.000576692	0.00940666	0.00734852	4383	tags=60%, list=30%, signal=42%	247/10062/3690/4790/3606/5465/5583/5601/4481/19/338/23461/8435/183/5468
GO:0010743	regulation of macrophage derived foam cell differentiation	19	-0.552698	-263169920282602	2.87754e+09	0.000959584	0.000749631	4383	tags=74%, list=30%, signal=52%	247/10062/3690/4790/3606/5465/5583/5601/4481/19/338/23461/183/5468
GO:0010810	regulation of cell-substrate adhesion	174	-0.173411	-195152486865412	0.00142262	0.0174506	0.0136325	4444	tags=44%, list=30%, signal=31%	71/5881/1307/6789/8322/50488/2013/23603/1021/387/57669/6281/10979/3175/5295/25/27185/79625/2192/253725/54453/81/80005/1029/56940/22998/5728/8631/23122/4241/59339/2335/51144/79834/23499/4771/1605/1785/90102/2651/2039/2185/811/5786/6251/54828/5795/55604/5747/1793/8573/5590/23332/8874/6714/5314/57580/136227/4035/3987/6239/6904/5291/4739/2932/255743/7402/23189/4811/1842/51057/4088/3717/4763/56477/5581
GO:0010817	regulation of hormone levels	357	-0.16539	-225748468562478	3.06986e+09	0.00100565	0.000785617	5287	tags=48%, list=36%, signal=31%	54795/8614/5019/1908/3767/27230/1385/2672/51762/9249/147015/94121/6720/5894/5781/27122/3651/91608/51478/9448/2029/79644/6906/1733/1813/83875/3295/8660/80223/8322/650/1576/55636/3169/25942/6817/8431/3667/387597/1594/8862/5861/3991/2297/5978/4790/9854/3784/8608/9230/405/157506/54905/8723/6927/3416/1636/3249/223/4602/10202/9227/51768/7367/8425/174/7849/5211/1559/23428/6453/6121/9971/1312/5467/4087/2…
GO:0010876	lipid localization	335	-0.210466	-28128030807098	1.23299e+06	1.56058e+08	1.21913e+08	5065	tags=51%, list=35%, signal=34%	2181/114879/6720/7274/5306/5781/81537/50636/80148/286046/2055/20/337/950/1581/1813/58488/55754/8660/64801/83394/10062/389668/8322/200931/208/114883/6713/118987/51054/3690/8431/55252/788/57614/55102/8529/29923/57488/79895/4790/9854/5025/3784/85320/171023/84725/219931/54762/10226/1636/2168/80820/738/6578/5321/7436/4602/9227/718/10349/11000/8204/345/2058/79135/23762/10162/57088/4040/2172/9885/10087/…
GO:0010883	regulation of lipid storage	43	-0.328091	-220845719647097	0.00121342	0.0157485	0.0123028	4334	tags=56%, list=30%, signal=39%	10062/3690/55252/29923/4790/171023/10226/718/5467/5465/114882/5771/4232/1374/6721/79068/32/4481/949/19/338/128486/158219/5468
GO:0014888	striated muscle adaptation	25	-0.367821	-195390365978622	0.00369651	0.0333105	0.0260223	3333	tags=56%, list=23%, signal=43%	7222/2934/28999/22876/84676/2308/2627/5530/9569/9759/493/2475/818/4088
GO:0015695	organic cation transport	30	-0.346761	-200736504093568	0.00373986	0.0335499	0.0262093	4653	tags=60%, list=32%, signal=41%	6582/85413/126969/788/2030/55244/6584/23428/80736/5663/6581/80704/115286/23446/6583/204962/5174/284439
GO:0015721	bile acid and bile salt transport	22	-0.40571	-206012361964023	0.0019369	0.021402	0.0167193	6768	tags=86%, list=46%, signal=47%	10998/1109/5825/347051/1581/200931/8431/85320/1645/5205/11309/6554/123264/10257/84068/6579/1244/6555/8714
GO:0015850	organic hydroxy compound transport	188	-0.231951	-268194852885994	2.18382e+08	0.000118807	9.28126e+08	4737	tags=50%, list=32%, signal=34%	65010/20/6582/337/1581/1813/64801/358/10062/5864/200931/114883/3690/8431/57614/4790/3784/85320/1137/219931/54762/80820/4602/282679/345/23762/10162/23208/4040/9885/1582/6857/6526/114882/57586/114880/1645/6581/114876/60/84947/5071/5205/6342/11309/360/6554/1080/29881/123264/5727/4547/3745/6721/51474/339221/18/6523/57476/115584/6256/10257/114134/89872/4481/21/4129/6532/949/127833/84068/6579/9066/1244…
GO:0016042	lipid catabolic process	252	-0.225448	-282144604771799	3.77434e+06	4.04218e+08	3.15777e+08	5071	tags=52%, list=35%, signal=35%	747/285148/254552/5333/205251/5828/284161/66002/80339/337/11145/79644/1581/83667/13/2110/83875/11343/3295/8660/3712/9651/10455/57406/23600/79887/4258/23259/1576/208/3032/10994/84696/3667/653308/1594/3991/8529/5331/2108/55862/1891/80821/54905/84830/2168/5321/84129/3073/345/1962/7879/22876/5467/5465/51171/8644/283927/81579/26061/4051/5105/8879/5106/3030/285848/1384/6342/30/57552/1666/222236/1374/27…
GO:0016072	rRNA metabolic process	228	0.419956	516375542120464	5.2576e-15	7.31989e-12	5.71833e-13	5888	tags=77%, list=40%, signal=47%	10436/55505/84365/23481/51154/55695/9277/112479/22894/64963/55299/9775/317781/51602/84135/705/27341/65080/22984/65083/54853/11056/54606/23404/84916/84549/23560/55035/84128/9188/57050/5036/27042/10969/10813/117246/285855/55646/55781/55661/114049/65095/54663/3669/10528/161424/55720/55813/9221/51119/56342/113510/10199/51729/51367/84294/10360/29777/51575/155400/79707/57602/83732/51547/51077/55178/818…
GO:0016125	sterol metabolic process	127	-0.298933	-301231327376742	7.10423e+06	6.5939e+08	5.15119e+08	4745	tags=57%, list=32%, signal=39%	1050/51478/2055/337/1581/7108/64801/10654/22937/1576/6713/8431/2224/47/3991/4598/2222/51360/3157/7436/3930/10162/1559/3953/1582/9971/10613/5467/2784/84650/11161/51422/8720/1718/10682/114876/1727/1080/29881/3069/6721/2230/4047/50814/6307/51474/285440/8029/6256/3988/847/2053/949/3638/25987/19/4041/6718/338/255738/23461/10826/84649/8435/3158/351/1717/1593/158219/3990/2330/6822/51141
GO:0016311	dephosphorylation	346	-0.168896	-228084491692928	1.23523e+09	0.000529153	0.000413376	4953	tags=46%, list=34%, signal=31%	7184/23371/29101/5494/5781/81537/4534/1033/5524/2029/5159/5774/84687/1813/6093/7531/9150/9829/5789/11099/650/92235/54434/5725/55197/9858/8725/5802/132160/808/5518/9891/27124/64419/57718/55291/493911/7803/11156/4952/80824/28227/4208/57181/10106/5501/5784/5533/3551/51496/55844/22978/57223/3613/801/390928/22876/54928/130367/5495/54545/5723/56940/142679/3476/10380/5728/11261/57546/8611/5771/8897/2290…
GO:0016458	gene silencing	161	0.179161	199086818473217	0.00194566	0.0214561	0.0167616	4417	tags=45%, list=30%, signal=32%	56339/5936/84872/8353/7157/10269/10978/23411/1655/5901/51593/79753/84981/22880/144233/57169/54107/84962/80149/22916/55196/1981/10984/90459/10155/7124/54737/23378/8737/9125/90853/8357/114614/8467/79670/8356/51490/57343/9470/1017/3146/6895/3065/9665/7538/652/53615/54487/1654/57510/4849/407975/7073/4686/106660606/9337/7175/102238594/10521/29883/1660/11022/126374/373863/11176/407006/2332/693201/3692/…
GO:0018210	peptidyl-threonine modification	107	-0.211466	-199994318925429	0.00162741	0.0191131	0.0149313	5202	tags=52%, list=35%, signal=34%	8767/596/5599/1020/1116/117854/1459/6093/5585/91/8798/5591/808/3093/983/1111/7443/65125/5566/10114/1859/801/5594/51422/8658/5170/5604/57452/5528/9578/90/5587/84630/9730/2039/2590/5578/28996/56288/57521/817/219736/7225/8476/27347/2589/2932/143941/2475/11113/351/8312/63917/1950/22853/2591
GO:0019216	regulation of lipid metabolic process	247	-0.176826	-218692601712595	9.96455e+09	0.00244461	0.00190974	5111	tags=48%, list=35%, signal=32%	1385/2672/2181/80207/6720/9965/205251/29956/27122/20/221395/131118/337/1581/5159/13/8660/64801/29103/6095/57406/10062/9975/650/23682/22937/208/3667/9926/1594/1389/5978/4790/157506/51360/2168/55198/718/51085/64919/56848/345/2147/10162/83643/5164/376497/9971/10613/5467/5465/2784/51422/8720/8644/79888/9611/11261/5105/8611/85414/10464/8897/476/5525/8898/9563/10451/5587/8396/1374/153090/2185/339221/74…
GO:0019217	regulation of fatty acid metabolic process	65	-0.252408	-19912778490661	0.00393015	0.0343056	0.0267997	4977	tags=55%, list=34%, signal=37%	6720/205251/337/1581/8660/10062/22937/208/3667/9926/2168/55198/51085/345/5164/10613/5467/5465/51422/9611/85414/10464/1374/32/5165/83752/3638/5163/23038/60481/2475/84649/9104/57761/5468/51141
GO:0019439	aromatic compound catabolic process	397	0.122108	175294932949234	0.00356988	0.0325913	0.0254605	4888	tags=42%, list=33%, signal=28%	6741/56339/8531/90806/9567/8930/10921/9238/51154/54915/55181/22894/9775/200035/1543/9939/65080/6832/1774/23404/1655/246243/54855/9704/2521/8882/7378/5433/85441/54658/54888/3669/23049/8761/55603/2931/5511/80149/22916/55629/54542/65109/55596/79072/115572/2107/5436/23658/51025/125061/1267/9583/10984/1890/4116/53918/677/79675/25804/8313/201626/9125/215/9513/64577/3094/23583/154197/51690/6041/6996/461…
GO:0019674	NAD metabolic process	24	-0.411116	-215594226837384	0.00127334	0.0159061	0.0124259	5616	tags=75%, list=38%, signal=46%	133686/4190/2820/3099/3607/54981/5211/5106/2819/5213/3939/2023/23475/221937/229/8604/23171/5214
GO:0019886	antigen processing and presentation of exogenous peptide antigen via MHC class II	15	0.498504	215429386238209	0.00188753	0.0211502	0.0165226	2911	tags=60%, list=20%, signal=48%	1515/567/5641/3108/2207/7189/972/1514/3112
GO:0021953	central nervous system neuron differentiation	99	-0.207725	-191405672775264	0.00536491	0.0427143	0.0333686	4857	tags=49%, list=33%, signal=33%	1020/3251/6886/2055/4781/1813/5881/79600/6095/2043/25942/4137/10371/79809/23287/538/9693/64398/51199/27185/79625/64919/23077/9334/26058/2016/5728/5663/4983/85358/4967/151449/5727/26160/57178/51684/2263/55906/2048/25987/104/79659/23314/2909/143941/8925/6608/57688/25809
GO:0022600	digestive system process	65	-0.252469	-199175651496025	0.00393015	0.0343056	0.0267997	6361	tags=65%, list=43%, signal=37%	7357/5020/1056/55765/51738/7430/7429/1131/1314/65010/337/358/10062/7033/50848/3784/9414/65125/2168/6584/10162/1582/7032/1645/29881/29887/5357/7421/51474/339221/2035/6523/80168/949/6518/57482/64081/2169/48/27347/7442/8435
GO:0022604	regulation of cell morphogenesis	251	-0.14425	-17974022752038	0.00384144	0.0341196	0.0266543	4073	tags=38%, list=28%, signal=28%	57619/118987/9043/2620/23603/5591/50848/387/6281/10979/84079/10458/4627/9203/23221/3689/3249/25/50618/5361/1436/2147/161176/2192/253725/89846/6857/4976/81/80005/192670/254065/116985/3706/9202/4241/5071/2335/26259/23499/55785/22836/56990/1605/2534/1785/157922/1739/2039/2185/811/23370/1523/2035/29904/10154/55604/5747/23327/1793/23136/9962/10507/4651/114804/8874/127833/6714/114793/30011/221061/57580…
GO:0022613	ribonucleoprotein complex biogenesis	418	0.397451	575334098544503	9.97341e-32	5.55419e-29	4.33896e-28	5123	tags=69%, list=35%, signal=46%	23064/10436/81875/79869/64434/10594/55505/8664/84365/23481/26835/51154/55695/9277/112479/22894/6059/6633/64963/51388/55299/90441/9775/26155/317781/51602/84135/220064/26164/705/27341/22984/65083/10978/1983/54853/11056/54606/7919/23404/51491/84916/6637/84549/23560/22889/5901/55035/84128/9188/57050/3320/8669/5433/5036/10772/27042/10969/10569/10813/117246/29889/285855/55646/8668/55003/25980/55781/556…
GO:0022618	ribonucleoprotein complex assembly	182	0.35083	40797184012216	0.0418434	15.5351	12.1361	5989	tags=71%, list=41%, signal=43%	23064/79869/10594/8664/26835/51154/6633/64963/55299/27341/10978/1983/7919/6637/22889/3320/8669/5433/10772/10569/8668/25980/9129/10419/9416/23020/56342/8662/11171/91746/55015/10421/29777/3326/83640/55794/10946/28985/55011/50628/9733/25804/51340/11218/10181/11052/6431/24148/6426/6152/4809/54475/121053/8894/9092/101954267/26284/6628/8562/56949/4839/51081/22907/11051/9326/545/54505/6895/55052/7536/79…
GO:0023061	signal release	322	-0.152026	-201787042170902	0.000377596	0.00673985	0.0052652	5287	tags=47%, list=36%, signal=31%	54795/5019/6850/1908/3767/27230/1385/51762/94121/6720/2054/5894/5781/3651/1020/80331/8541/91608/9448/2029/1143/1813/8660/80223/27345/8322/79971/5864/55636/8431/3667/387597/112476/808/8862/5861/2297/5978/116841/9854/5025/3784/9230/1137/8723/4208/6927/5321/4602/51768/8425/7849/5211/23208/5906/6453/801/41/6857/9971/9783/5467/4087/55638/27445/57586/80736/5106/26059/5663/133308/6717/114131/55450/5071/…
GO:0030048	actin filament-based movement	95	-0.25459	-230584361717711	0.000151059	0.00333829	0.00260789	4048	tags=48%, list=28%, signal=35%	2013/7134/3760/57669/140465/3784/4627/2934/3757/9722/51168/81/22998/6640/57698/2258/6717/476/4646/274/1739/287/776/4642/4645/817/23327/644150/3752/4640/4650/23224/783/4643/4628/79784/23171/6331/55930/10142/7456/4430/4648/440193/2626/6262
GO:0030210	heparin biosynthetic process	10	-0.551867	-197372124140041	0.00354631	0.0324826	0.0253755	3727	tags=80%, list=25%, signal=60%	64579/284/64132/2131/2132/84068/3340/26035
GO:0030318	melanocyte differentiation	17	-0.441761	-199589987191714	0.00538087	0.0427298	0.0333807	5186	tags=71%, list=35%, signal=46%	596/1908/4208/4286/1910/8975/5873/55686/4948/83938/5167/2767
GO:0030513	positive regulation of BMP signaling pathway	27	-0.339114	-188560072937374	0.00664642	0.049025	0.0382986	4255	tags=56%, list=29%, signal=40%	375616/79176/63893/2297/2719/57045/4487/4087/222223/3516/4756/659/4853/4926/2626
GO:0031214	biomineral tissue development	111	-0.200623	-191639119878108	0.00475078	0.0389648	0.0304395	6653	tags=61%, list=45%, signal=34%	9475/654/130497/4077/645811/240/9451/10457/10312/57419/22904/9313/5744/92/10117/54795/93/9562/1051/3381/9923/54084/490/54959/6093/650/100533183/79176/1594/166929/54880/55366/2719/4208/197/5818/1230/84059/4921/5465/433/55151/6546/2308/1080/55589/7481/29887/90/57560/5745/2185/4015/6786/55512/2263/56172/659/657/5251/54757/359845/196527/5167/56975/2621/3694/4088
GO:0031497	chromatin assembly	91	0.20523	188430666495414	0.00490404	0.0398695	0.0311462	2827	tags=36%, list=19%, signal=29%	256329/8367/8353/23234/7157/6046/26155/29855/54623/23411/64061/8345/83743/6418/8365/144108/6662/8339/9733/3017/23378/8362/8357/8467/8356/7259/8344/8364/3146/440689/8341/3014/146059
GO:0031589	cell-substrate adhesion	281	-0.158142	-200489522436144	0.000594075	0.00959527	0.00749587	5325	tags=48%, list=36%, signal=31%	3913/3675/9928/9480/5310/596/8754/8500/50509/7301/5781/1942/1020/2633/9448/11093/6093/71/5881/1307/6789/54822/8322/50488/8910/10225/7448/7450/3915/2013/23603/3914/3690/1021/7148/5861/387/57669/6281/10979/3175/3689/5295/25/284/27185/79625/2192/253725/54453/81/80005/5467/1029/56940/22998/5728/5170/4091/8631/23122/4241/59339/2335/51144/79834/22795/23499/4771/80725/1605/1785/90102/2651/2039/2185/811/…
GO:0031667	response to nutrient levels	379	-0.142269	-195909261581499	0.000515401	0.00875082	0.00683618	5105	tags=45%, list=35%, signal=30%	3600/5599/2181/7352/5292/6569/6720/7274/3162/3651/2937/717/490/3309/8932/84557/1789/6648/2029/122622/83667/1536/340024/662/178/29103/2056/10919/55846/5289/10325/1594/100/27141/3607/9891/583/191/96459/167359/7486/7482/462/22856/27244/83939/3157/5009/1978/55198/9227/83990/7392/51520/5164/1723/23367/1582/5594/9474/5595/9971/4976/1312/6513/5467/5465/220441/5610/5723/51422/8644/5728/8131/8658/55062/19…
GO:0032200	telomere organization	134	0.222187	230808033119106	0.000226573	0.00462192	0.00361066	3187	tags=41%, list=22%, signal=32%	8367/55505/8353/55135/54386/9134/908/6950/2067/5111/10694/220064/24144/5514/7014/3320/26354/23049/675/2072/8365/3326/3364/51548/22948/10576/3104/54552/80169/10574/8362/7203/6119/898/8357/8356/80351/1736/8364/545/6118/11284/5394/23381/4609/85456/167227/79991/10039/55226/3192/170506/64858/5976/7517
GO:0032259	methylation	310	0.139657	188135562339521	0.00295917	0.0290867	0.0227226	6085	tags=51%, list=41%, signal=30%	10436/56339/24140/55695/94104/4524/10269/7172/23067/1543/54931/57570/6830/4152/54623/56257/23411/9836/79918/9219/117246/144233/51605/54888/114049/10419/26097/7936/30827/79091/64783/2931/9646/9757/4234/79872/5252/83640/29890/2107/23091/155400/5929/51547/55352/55178/55011/10155/4297/54737/23378/51093/4000/64745/54554/9589/11108/90853/4552/8473/64216/51490/55783/4221/220074/57343/25917/6628/79922/48…
GO:0032409	regulation of transporter activity	198	-0.164267	-19194780451932	0.00500384	0.0404447	0.0315956	5362	tags=48%, list=37%, signal=31%	2280/2946/2859/1131/596/3767/1520/56704/57520/5292/9456/1020/54602/7341/149111/5774/1813/7871/5349/7531/2056/57463/10062/285966/50488/808/6271/3784/84766/10681/4208/65125/538/5566/56848/57338/9722/1612/801/81/6526/5728/11261/60/2258/6717/154881/85358/1080/1756/63892/1785/1739/401152/3460/2185/481/287/776/6786/11060/57158/115584/817/6256/23327/3064/288/2048/7225/9472/783/27347/27092/8398/255738/65…
GO:0032411	positive regulation of transporter activity	87	-0.214121	-188928404852509	0.00636756	0.0479202	0.0374355	2254	tags=34%, list=15%, signal=29%	154881/85358/1080/1756/1785/3460/481/287/6786/57158/6256/3064/288/2048/7225/9472/783/27347/27092/6536/57620/9446/5336/65268/5174/2745/10142/9104/30819/6262
GO:0032528	microvillus organization	24	-0.428707	-224819178642154	0.000651018	0.0102618	0.00801656	5843	tags=79%, list=40%, signal=48%	7430/7429/53841/688/5781/5420/9693/83715/5909/10083/54825/5205/5357/23043/342035/4640/51735/5337/9368
GO:0032677	regulation of interleukin-8 production	54	0.262181	199078542184942	0.00536455	0.0427143	0.0333686	5271	tags=57%, list=36%, signal=37%	7114/5054/5970/4843/336/8915/7124/284297/2152/8737/301/58509/972/11315/4615/3146/51157/2150/602/7474/7099/56957/9314/1649/25865/23005/8692/84632/8772/6774/3553
GO:0032728	positive regulation of interferon-beta production	33	0.332053	203068506160855	0.00363582	0.0330144	0.025791	4738	tags=58%, list=32%, signal=39%	10623/3320/3659/661/81844/10621/3665/8780/3661/3146/1654/10211/1660/29110/7099/4940/9636/148022/79132
GO:0032787	monocarboxylic acid metabolic process	464	-0.244672	-354373153531094	0.0129111	5.99181	4.68083	6668	tags=66%, list=45%, signal=37%	402/2264/2170/6507/28964/8443/10999/7416/390916/8564/11019/5447/26063/5446/240/1109/226/51495/1056/3995/1066/4199/9663/84879/5563/158833/23659/242/5825/224/7132/34/10434/641371/26027/84266/7167/2166/1381/57678/35/5166/2678/144193/1558/570/10005/197257/9200/2584/134429/9444/4200/2571/7923/2946/1580/5226/116285/9380/51703/23305/414328/747/2181/122970/7352/2052/9415/6720/254552/9965/205251/5828/1272…
GO:0032868	response to insulin	217	-0.224642	-270249718614769	1.48325e+08	8.42878e+09	6.5846e+09	5081	tags=53%, list=35%, signal=35%	4218/51762/7352/6720/23371/5781/55667/490/80339/83667/142/9882/8660/5315/7249/22937/208/55971/5591/3667/2885/10014/55022/3784/10458/8412/84327/197/5009/3416/5295/55198/79746/94056/28999/27131/132864/2058/3481/5164/376497/6121/4976/80318/6513/5465/5728/5170/114882/5105/5106/5771/3030/2308/64710/2549/2887/896/4690/339/8396/2538/7494/3033/3643/5786/29904/2690/3480/5590/10580/8743/252983/847/2241/665…
GO:0032870	cellular response to hormone stimulus	451	-0.157982	-227022570031424	8.37463e+07	0.000364362	0.000284641	5111	tags=46%, list=35%, signal=31%	1385/1520/4218/51762/7352/6569/6720/23371/161582/5781/55667/490/26508/80339/5962/1789/29966/142/10013/6093/9882/8660/358/5315/7249/5585/9975/208/23019/55971/3169/3275/5591/8725/3667/5272/2885/387/583/4848/5978/10014/55022/11240/4790/10458/8412/10413/84830/8289/7332/55366/23028/367/4208/197/3157/890/3416/5295/55198/79746/83990/94056/5566/27131/7849/81606/132864/2058/3481/10498/5164/3953/376497/612…
GO:0033059	cellular pigmentation	47	-0.281249	-197668367128942	0.0062072	0.0474771	0.0370893	6305	tags=62%, list=43%, signal=35%	79090/2647/4644/84100/5874/8943/4647/23557/596/10981/8766/23682/57619/5861/583/84079/9230/4935/8907/5873/64284/55686/1001/1130/63971/8546/357/84062/8934
GO:0033108	mitochondrial respiratory chain complex assembly	93	0.211919	194365417325585	0.00611851	0.0469986	0.0367155	6067	tags=55%, list=41%, signal=32%	7019/29078/4700/51103/4715/6834/79072/116228/100131801/617/55572/90639/728568/4695/7386/4722/4710/55471/644096/135154/4708/29090/4716/84300/84233/285521/4712/28976/6341/5018/389203/4706/4709/374291/493753/51079/51287/25915/284184/4725/4707/51204/10063/54902/54539/4702/790955/9997/90624/131474/4728
GO:0033750	ribosome localization	14	0.597777	247673905768659	0.00013111	0.00303621	0.0023719	4861	tags=93%, list=33%, signal=62%	6059/5901/55781/161424/55341/51068/7514/55153/84946/4927/3692/23212/6209
GO:0034219	carbohydrate transmembrane transport	91	-0.280516	-249658331471462	3.45459e+09	0.00110434	0.000862717	4937	tags=56%, list=34%, signal=37%	9965/5781/83667/3099/4205/8660/79058/208/3667/7525/1389/55022/148808/2719/6927/5295/55198/718/28999/5906/55314/376497/673/6513/5467/51422/6526/114882/85414/9963/1432/144195/2887/8218/3643/6523/115584/155184/200010/10580/9962/252983/56606/6272/9847/6518/26503/91749/5167/6514/57761
GO:0034248	regulation of cellular amide metabolic process	412	0.165016	239551795672095	2.72249e+08	0.000144396	0.000112803	4884	tags=45%, list=33%, signal=31%	56339/8531/84919/5936/3673/8664/55695/836/7157/54915/22894/6059/51123/9775/7057/9939/26164/8890/9001/54931/1983/3491/7919/1802/23404/5621/23163/5433/55323/5036/57103/29095/8507/1965/9221/149986/8892/8662/2931/1982/51247/80149/2733/22916/1984/54542/65109/60558/1801/5970/79072/1981/2107/8569/5436/6199/4116/53918/7124/677/285381/6253/5935/201626/9125/9513/26046/56648/7248/51250/708/154197/1191/90850…
GO:0034329	cell junction assembly	287	-0.169778	-217007202984353	0.000101354	0.00247562	0.00193396	4697	tags=45%, list=32%, signal=31%	1008/9448/5062/1813/6093/387804/71/6259/57463/27020/1307/5789/55209/64084/221935/6801/9075/4867/79414/3915/23603/5802/50848/387/57669/6281/5175/10979/4301/10611/4204/6712/4208/1636/3551/9693/7368/25/10082/5818/5566/149461/8642/5906/3556/5583/56940/22998/266977/5728/5170/27445/23122/375790/9746/60/2258/8292/79977/4983/2335/85358/79834/23499/64284/7481/92140/90102/23396/1739/2039/2185/999/2066/287/…
GO:0034330	cell junction organization	485	-0.191816	-281115236327047	113484	2.03868e+07	1.59263e+07	4909	tags=47%, list=33%, signal=33%	9456/1500/5781/1942/1020/1741/8541/5962/1008/9448/2904/1524/5062/10013/1813/6093/387804/831/115703/71/6405/58489/6259/57463/27020/1307/5789/55209/64084/2043/1282/221935/6801/83605/8496/54434/9075/5864/4867/79414/79987/3915/23603/6780/27134/5802/203068/50848/387/57669/5978/6281/5175/10979/4137/55752/9912/22859/4301/10611/10458/9414/4204/6712/4208/8404/1636/3551/9693/7368/1139/5295/25/10082/29841/1…
GO:0034762	regulation of transmembrane transport	362	-0.174965	-239776762269351	6.57566e+08	0.000300163	0.000234488	5362	tags=49%, list=37%, signal=32%	2280/375/2946/2859/51703/1131/596/1908/3767/799/1520/56704/4946/57520/5292/6569/170850/9965/9456/5781/1020/1729/54207/7341/65010/23415/149111/8913/1536/3099/5774/53373/53405/1813/4205/7871/5349/8660/60598/7531/2056/57463/117155/285966/79058/50488/208/55636/1318/3667/113451/653519/808/3760/7525/1389/6271/55022/3784/91404/84766/10681/6335/2719/4208/65125/219931/538/5295/55198/25/3757/718/25932/5566…
GO:0035107	appendage morphogenesis	105	-0.202093	-189464109258311	0.00628833	0.0475166	0.0371201	5963	tags=54%, list=41%, signal=32%	54903/8434/27077/3209/51176/4613/140467/51222/3549/9496/27152/221833/26005/7704/6468/55636/79583/4154/1280/23322/8323/157506/2719/10512/80856/4487/54928/100131390/221322/5663/79977/1954/1387/51098/5915/57728/5727/546/1889/2131/80144/5087/5125/9742/2263/4038/64327/657/4853/79659/4041/23288/51776/6497/28982/5362/51057
GO:0035108	limb morphogenesis	105	-0.202093	-189464109258311	0.00628833	0.0475166	0.0371201	5963	tags=54%, list=41%, signal=32%	54903/8434/27077/3209/51176/4613/140467/51222/3549/9496/27152/221833/26005/7704/6468/55636/79583/4154/1280/23322/8323/157506/2719/10512/80856/4487/54928/100131390/221322/5663/79977/1954/1387/51098/5915/57728/5727/546/1889/2131/80144/5087/5125/9742/2263/4038/64327/657/4853/79659/4041/23288/51776/6497/28982/5362/51057
GO:0035265	organ growth	117	-0.239878	-233899940014613	0.000134968	0.00308047	0.00240648	5206	tags=56%, list=35%, signal=37%	5914/596/27230/4061/5292/5781/4086/5159/10370/9150/10919/6789/891/55841/1852/983/10611/10413/6416/367/4208/80014/3481/3953/5324/5594/4921/5465/4087/5728/55151/1432/196528/5915/7490/11214/3516/7528/2627/57560/2066/2131/8470/32/7049/6532/9686/55512/2263/657/3720/25987/309/9472/6788/23286/7161/85301/5058/2475/57493/28982/6608/183/51124/2626
GO:0035592	establishment of protein localization to extracellular region	268	-0.162835	-205063457321539	0.000247917	0.00487862	0.0038112	5685	tags=50%, list=39%, signal=31%	2746/5532/101/9619/10961/5048/173/22820/23607/375/54795/5019/8754/3767/27230/201158/27236/4218/51762/94121/6720/5894/5781/3651/9448/2029/6400/51172/84315/1813/8660/80223/3418/10062/4053/93145/55204/79971/5289/5864/8431/3667/387597/5978/9854/9230/64175/84830/6927/374969/51768/5211/9971/84976/5467/4087/55638/64083/10972/27445/55691/8736/5106/9601/133308/399687/6717/114131/55450/9545/5071/283/55107/…
GO:0035721	intraciliary retrograde transport	13	-0.635099	-254230492379857	6.71747e+09	0.00185196	0.00144676	4199	tags=77%, list=29%, signal=55%	55112/79809/57539/51626/112752/57728/55764/22858/9742/79659
GO:0035725	sodium ion transmembrane transport	115	-0.255194	-24420267548181	5.86581e+09	0.00165821	0.0012954	5431	tags=57%, list=37%, signal=36%	6339/375/54795/150159/57520/142680/6569/8913/340024/5774/53373/7871/5349/8671/9497/3784/10479/6335/65125/219931/64078/41/81/6550/6640/11261/9963/2258/133308/6546/6568/476/57835/1756/1785/10050/1739/481/6523/817/23327/6532/6334/288/9498/357/150684/196527/6549/27347/84679/255738/6536/23171/493/6331/7402/6535/65268/2745/6533/4734/9368/5581/6575
GO:0036314	response to sterol	27	-0.425191	-236421838316733	0.000267902	0.00514465	0.00401902	4671	tags=70%, list=32%, signal=48%	20/1581/6095/10654/3157/54762/4040/1582/4087/5727/1605/57476/65985/3638/19/2822/2155/6608/51141
GO:0036315	cellular response to sterol	18	-0.47181	-219397922104566	0.00204947	0.0222919	0.0174146	4615	tags=89%, list=31%, signal=61%	1066/7804/1581/6095/3157/54762/4040/5727/1605/57476/65985/3638/19/2822/6608/51141
GO:0038093	Fc receptor signaling pathway	37	-0.341272	-213307081309626	0.00102159	0.0139675	0.0109115	3854	tags=57%, list=26%, signal=42%	7525/6416/3551/55198/25/5906/6654/5601/10451/2534/7410/5795/5747/2241/6714/4067/8398/5058/5336/5588/5581
GO:0038096	Fc-gamma receptor signaling pathway involved in phagocytosis	20	-0.478401	-233530329131344	0.000325155	0.00601591	0.00469965	5250	tags=80%, list=36%, signal=51%	6850/3984/7525/55198/25/5906/10451/2534/7410/5795/5747/6714/4067/8398/5058/5581
GO:0040008	regulation of growth	492	-0.118555	-173709830297538	0.00345794	0.0318829	0.024907	6213	tags=50%, list=42%, signal=30%	3872/11116/29967/84879/8829/23180/23394/7784/55031/152404/28514/51738/8089/9655/56920/7430/51761/3484/84722/4211/10668/30837/83737/57678/223117/10459/56649/5048/4494/5290/1457/84289/7429/57731/9928/5371/7869/596/27230/1385/3487/5292/5931/22954/3984/3549/1020/135644/57556/4881/8804/10399/10591/5062/56981/83667/9306/84687/1813/10370/6405/9150/6259/247/4869/6789/8766/891/79577/6195/91/54556/55841/55…
GO:0042133	neurotransmitter metabolic process	21	-0.453271	-226620974755722	0.000692058	0.0105819	0.00826664	5338	tags=81%, list=36%, signal=52%	2571/590/747/6582/23287/3176/223/1312/80736/8292/2644/18/4128/5053/4129/6532/7915
GO:0042255	ribosome assembly	57	0.403324	313843500454354	1.85703e+07	1.32587e+09	1.03578e+09	5947	tags=79%, list=41%, signal=47%	51154/64963/51388/55299/27341/51119/56342/29777/55794/51001/708/6152/84769/54475/26284/4839/51081/22907/54505/55052/1654/6147/3921/84154/130916/6169/6128/51116/6208/3692/6175/23212/7520/91695/6209/29093/6223/102724159/5822/6234/6125/51065/23246/6193/6232
GO:0042330	taxis	365	-0.132209	-180964218485014	0.00193183	0.0213884	0.0167087	5922	tags=48%, list=40%, signal=30%	91624/56920/1949/2920/27237/284656/223117/51176/23513/4814/3071/101/11251/2919/683/3913/727/54795/8995/7869/6850/1908/1385/1800/1672/284114/9637/1942/1020/57556/1943/2050/80270/1524/5159/4908/4781/1944/409/6405/55219/6259/27020/7249/25960/284217/8997/2043/100532736/285220/23022/9732/55740/126147/3690/6358/387/5293/128434/4854/2297/120425/11240/10371/5025/55848/57402/7976/65125/9097/6091/3689/1051…
GO:0042391	regulation of membrane potential	262	-0.1775	-222773343731216	0.000111118	0.00265587	0.00207477	4788	tags=46%, list=33%, signal=31%	54207/7341/10399/23415/149111/8913/6648/2904/142/1738/1143/5774/1813/7871/83875/2905/8671/409/60598/7531/27345/10935/29119/54434/208/63895/808/3760/665/55022/4137/5025/3784/2030/10458/1137/5831/6335/4204/4208/6455/93974/1139/25/3757/2557/149461/9722/801/41/1135/9783/6640/5728/1134/5663/2258/664/6546/6717/154881/114131/5071/1811/476/85358/8898/1080/9780/1756/274/2900/54899/3745/1739/2185/481/18/28…
GO:0042403	thyroid hormone metabolic process	18	-0.435662	-202588715226932	0.00627148	0.0475166	0.0371201	3284	tags=61%, list=22%, signal=47%	3249/7849/50506/10404/117247/27284/7038/51301/1428/389434/6822
GO:0042551	neuron maturation	32	-0.427843	-253057055841268	5.33599e+09	0.00151613	0.00118441	3443	tags=62%, list=23%, signal=48%	23028/4204/718/132320/9334/4976/1910/375790/9855/23294/163175/26047/342035/5925/4897/59277/2475/9175/351/30819
GO:0042593	glucose homeostasis	187	-0.199361	-229866841319878	8.4832e+09	0.00217709	0.00170075	4964	tags=49%, list=34%, signal=33%	5894/5781/3651/1050/10399/9448/221395/1581/83667/3099/8660/79058/3169/25942/6598/3667/3607/9854/2646/2030/9230/6927/5295/55198/123876/51085/5566/28999/7776/5164/3953/9971/7466/4976/6597/5467/55638/5836/57539/5105/5106/5771/133308/6717/55450/2308/55107/64710/1080/2821/5213/5727/2309/2538/3745/5799/7494/3643/10497/3480/5530/252983/5165/7447/6934/65985/91942/9324/55777/90550/283450/143686/2822/4041/…
GO:0042771	intrinsic apoptotic signaling pathway in response to DNA damage by p53 class mediator	40	0.312009	209314760063416	0.00296142	0.0290867	0.0227226	5697	tags=65%, list=39%, signal=40%	51499/7157/51616/23411/64782/675/1026/51246/972/22938/6880/204851/54541/602/6154/64844/79073/2033/3190/7917/3428/8626/960/10210/51065/29965
GO:0042886	amide transport	223	-0.212659	-256513656062765	4.22536e+08	0.000204618	0.000159848	5287	tags=52%, list=36%, signal=34%	54795/5019/23457/1908/3767/27230/51762/94121/6720/5894/5781/81537/8170/3651/91608/65010/9448/20/10057/2029/1813/8660/4257/55636/121260/51054/6892/8431/3667/387597/8862/5861/9197/92745/5978/9854/9230/55244/84725/6927/51768/8425/7849/5211/10087/6453/7380/6573/376497/9971/84976/5467/4087/55638/27445/5106/133308/6717/114131/55450/5071/55107/360/1080/5213/9575/4547/2182/1374/3077/4363/51228/3745/5799/…
GO:0042908	xenobiotic transport	34	-0.334034	-201106091383585	0.00368168	0.0332306	0.0259599	4669	tags=59%, list=32%, signal=40%	10057/6582/55754/85320/55244/6584/146802/6513/10682/6581/368/5205/4363/10257/21/1244/540/6583/5174/8714
GO:0043087	regulation of GTPase activity	269	-0.220284	-277057481956384	76806.2	6.89893e+08	5.38947e+08	4810	tags=50%, list=33%, signal=34%	1124/54959/5962/10399/9448/4908/57326/9882/409/9938/23158/7249/2043/112574/208/26130/23603/6358/57589/50848/55633/79774/6281/6001/10979/55616/94134/9912/4301/8412/54885/4952/139818/10681/128239/9824/65125/9693/51429/25780/5361/116984/51520/115704/23061/25782/132864/202243/6375/4594/5906/23161/25791/89846/5909/9712/116985/154796/22821/6359/375790/9905/55357/408/8831/7481/55785/10451/7052/23329/231…
GO:0043201	response to leucine	12	-0.601929	-234735408465726	0.000168061	0.00361363	0.00282298	4864	tags=92%, list=33%, signal=61%	3651/83667/5289/27244/23304/197131/51520/57521/58528/143686/2475
GO:0043269	regulation of ion transport	409	-0.167446	-234107634480826	2.76921e+08	0.000145488	0.000113656	5476	tags=49%, list=37%, signal=31%	2775/7779/84334/2280/375/84876/2946/2859/57731/5371/6850/1131/596/1908/3767/799/1520/56704/1051/57520/6569/170850/9456/1020/1729/490/54207/286183/7341/23415/149111/8913/5159/1536/5774/53373/53405/1813/7871/5349/409/60598/7531/2056/57463/128414/117155/285966/50488/5864/55636/5652/3690/1318/653519/808/3760/387/8529/6271/5025/3784/91404/84766/9230/1137/8723/10681/6335/4208/65125/219931/538/7222/7018…
GO:0043413	macromolecule glycosylation	185	-0.185872	-212817714889074	0.000689236	0.0105819	0.00826664	5579	tags=52%, list=38%, signal=33%	91319/29929/7841/27090/11227/66008/58505/4122/56913/5373/51465/27230/6483/3600/4351/11041/5372/20/9514/79644/51172/286148/256281/147991/56886/84892/2524/143888/84002/23509/84061/2137/79087/29071/8706/5238/201595/84197/2218/57134/29954/727936/282679/9334/54790/2673/55757/11226/4247/10905/7423/79695/11261/57452/22906/5663/93010/4248/51809/123264/8869/84899/2651/2131/2590/4249/9215/152002/256435/555…
GO:0043462	regulation of ATPase activity	39	0.294492	195545234985082	0.00441812	0.0370755	0.0289636	4949	tags=62%, list=34%, signal=41%	23234/10598/130872/3300/26097/51025/7248/51726/7169/482/8775/163590/26092/11345/79609/3337/7139/203547/10105/483/120526/6625/5018/5216
GO:0043473	pigmentation	81	-0.239118	-204437694059919	0.00209859	0.0226056	0.0176596	6305	tags=59%, list=43%, signal=34%	79090/2647/4644/84100/5874/8943/4647/23557/596/1908/10981/3549/81839/10399/1813/8766/23682/57619/5861/583/84079/9230/4208/538/4286/4935/1910/8907/8975/5873/64284/55686/1001/1130/63971/8455/4948/8546/1896/357/9896/83938/84062/8934/5167/84343/4763/2767
GO:0043547	positive regulation of GTPase activity	193	-0.244719	-28304629229233	1.293e+07	1.0001e+09	7.81283e+08	4810	tags=52%, list=33%, signal=36%	1124/54959/10399/9448/4908/9882/9938/23158/7249/2043/112574/208/23603/6358/57589/50848/55633/79774/6281/6001/10979/55616/4301/8412/54885/139818/10681/9824/9693/51429/116984/51520/115704/23061/202243/6375/4594/5906/23161/25791/5909/9712/116985/6359/375790/9905/55357/7481/7052/23329/23102/57533/2185/29/6251/8502/9779/23094/23216/25771/26037/54828/57186/57706/9922/10982/143872/23108/2889/163486/1050…
GO:0043931	ossification involved in bone maturation	16	-0.425985	-186690087922134	0.00657668	0.0487326	0.0380701	4247	tags=69%, list=29%, signal=49%	650/100533183/7704/387/8642/29887/57560/2131/64131/10507/359845
GO:0043954	cellular component maintenance	49	-0.279302	-197981022496232	0.00345498	0.0318829	0.024907	6128	tags=59%, list=42%, signal=35%	25861/8927/55765/2149/1365/3675/9456/1741/2904/5864/10979/80856/1436/27445/3706/26059/4983/8898/8831/1488/2534/1739/3643/23085/144100/3480/9788/85461/23613
GO:0043984	histone H4-K16 acetylation	19	0.43462	208817493495074	0.00380141	0.0338869	0.0264726	2181	tags=53%, list=15%, signal=45%	55683/54934/10269/23411/339287/55011/4297/84148/10943/8473
GO:0044057	regulation of system process	342	-0.148186	-199480902356126	0.000458544	0.0079801	0.00623409	4977	tags=44%, list=34%, signal=30%	6720/22839/9456/5781/7168/490/4881/5152/8913/337/142/27242/1813/6093/4205/11343/358/7531/9150/27345/10062/10659/29119/54434/9732/2013/10398/7134/808/3760/29995/100/8862/57596/387/6271/10371/5025/3784/10458/157378/1573/4204/65125/6455/7222/1636/1139/3757/4636/6584/5566/27131/9722/10162/85446/801/1582/84676/342527/1312/80005/5465/6640/5728/55151/7032/100506013/57539/10060/1910/2258/6546/6717/2308/4…
GO:0044262	cellular carbohydrate metabolic process	232	-0.228176	-276871935340783	9.70578e+06	8.18962e+08	6.39777e+08	3077	tags=40%, list=21%, signal=32%	2997/9334/57223/3481/3613/5164/3953/5255/9677/11181/256356/54928/673/5465/2784/51422/6526/10380/5728/5836/55556/3706/2720/9611/5105/85414/57486/5106/5771/3633/93010/5071/8898/2595/5213/2992/2538/114899/5745/2710/57001/2185/26007/2131/2632/3632/3643/8821/80168/5257/55277/32/10580/57733/2132/5165/9942/8908/8850/6714/5256/64080/90673/140710/3705/5210/9653/2822/10499/9759/5163/3340/221937/79158/2585/…
GO:0044270	cellular nitrogen compound catabolic process	386	0.12745	182328514969539	0.00157741	0.0188511	0.0147265	4888	tags=42%, list=33%, signal=29%	6741/56339/8531/90806/9567/8930/10921/9238/51154/54915/55181/22894/9775/200035/9939/65080/6832/1774/23404/1655/246243/54855/9704/2521/8882/7378/5433/85441/54658/54888/3669/23049/8761/55603/2931/5511/80149/22916/55629/54542/65109/55596/1577/79072/115572/2107/5436/23658/51025/125061/1267/9583/10984/1890/4116/53918/677/79675/25804/8313/201626/9125/215/9513/3094/23583/154197/51690/6041/6996/4615/7967…
GO:0044282	small molecule catabolic process	315	-0.286157	-3761724225666	0.0214878	9.10527	7.11308	6585	tags=68%, list=45%, signal=38%	10999/10157/390916/8528/8564/10295/11164/23464/26063/6472/5446/883/132789/1056/9663/84879/23659/2806/5825/34/113675/2747/7167/57026/2166/1381/2746/35/144193/10005/197257/2875/2584/2571/5226/5019/2592/414328/122970/5625/254552/22875/205251/51005/5828/160428/66002/2820/4357/79644/1581/83667/3099/2110/3295/8660/3712/10455/23498/10588/23600/128/1576/208/4860/3032/10994/2524/84696/89874/6817/3667/1594…
GO:0044283	small molecule biosynthetic process	442	-0.198667	-283686391123291	83733.7	1.59337e+07	1.24475e+07	5984	tags=55%, list=41%, signal=34%	242/2806/5825/34/113675/1609/2747/7167/4485/56997/2746/440/5166/58478/2678/9619/1558/80271/570/5631/10005/2875/9200/256987/134429/9444/2571/7923/2542/2946/5226/6850/116285/2672/2181/122970/9415/6720/9965/7874/27122/3251/127281/51478/80270/20/84105/337/79644/1581/83667/7108/11343/64801/23262/247/79611/10062/253430/283985/23498/23600/650/4258/10654/22937/1576/4860/114883/2944/79934/10994/2593/84696…
GO:0044782	cilium organization	293	-0.154457	-199197252606704	0.000369315	0.00663457	0.00518295	6745	tags=57%, list=46%, signal=31%	79989/79734/202018/79598/10938/80776/55329/91147/79819/22994/84223/92482/22897/989/55704/22873/23116/755/3985/84100/347240/10733/3911/54903/138639/150737/200894/27077/3766/374407/54970/55582/85452/92104/83547/83538/9480/118491/4218/9857/166379/161582/1183/125488/23639/57216/90355/10013/27152/54874/9114/80173/79600/4750/80210/1540/9786/85478/26005/55112/11190/85462/79583/23322/5108/1769/54806/583/…
GO:0045444	fat cell differentiation	173	-0.177557	-19961214029256	0.00277408	0.0276365	0.0215898	5317	tags=50%, list=36%, signal=32%	10603/54795/10124/1487/1385/129685/166379/1051/688/5292/169200/6720/22954/80339/1050/221395/22852/10013/4037/6095/6789/650/7704/208/81029/3914/55252/1389/583/64641/10979/51316/171023/10413/94056/284207/10498/84159/83643/25937/5467/2784/283927/51752/114882/4091/144404/122953/1432/664/2308/83862/115825/161882/54463/1488/222236/114899/7494/678/4329/79068/7204/23236/63976/8091/6934/65985/6272/9658/36…
GO:0045600	positive regulation of fat cell differentiation	47	-0.302062	-212296376834762	0.00222569	0.0235197	0.0183737	5469	tags=64%, list=37%, signal=40%	51043/54795/1385/1051/688/5292/169200/1050/6789/650/7704/55252/1389/94056/284207/10498/83643/5467/1432/115825/222236/7494/4041/6788/6783/9580/6239/1040/28971/5468
GO:0045913	positive regulation of carbohydrate metabolic process	54	-0.273264	-200840755611829	0.00487124	0.0396607	0.0309831	4464	tags=54%, list=30%, signal=38%	8660/8671/208/3667/4790/405/51085/57223/3481/5465/85414/5771/5663/2819/5745/3643/10580/8850/6714/90673/2822/51744/8604/84649/957/351/9104/5581/1950
GO:0045953	negative regulation of natural killer cell mediated cytotoxicity	12	0.564394	218831853918614	0.000873972	0.0125641	0.00981515	3308	tags=75%, list=23%, signal=58%	3105/100507436/634/3133/3106/1398/3135/3134/84868
GO:0046165	alcohol biosynthetic process	114	-0.277953	-267666274054763	3.32664e+08	0.000168419	0.000131569	5074	tags=56%, list=35%, signal=37%	2672/6720/27122/51478/20/84105/337/79644/1581/7108/64801/23262/253430/650/10654/22937/1576/653308/2224/1594/47/5978/4790/4598/2222/51360/3157/9517/56848/3930/3613/10162/9677/10613/8720/1718/10682/3706/1719/5105/5106/1727/1080/29881/9563/5745/4047/50814/6307/2185/5860/55331/3638/338/55304/51744/56624/5336/3158/1717/1593/3707/5092/51141
GO:0046209	nitric oxide metabolic process	61	-0.248162	-190207887383788	0.00442057	0.0370755	0.0289636	3015	tags=41%, list=21%, signal=33%	9722/140885/64902/57539/1727/2644/1785/2185/3643/23576/445/199/7097/64757/5740/1373/7442/493/113277/2475/183/4088/54996/3717/9104
GO:0046394	carboxylic acid biosynthetic process	243	-0.229249	-281566900215609	5.51971e+06	5.35093e+08	4.18017e+08	6833	tags=68%, list=47%, signal=37%	587/4282/875/10196/200879/189/10998/335/2264/6507/10157/8564/11019/26063/6472/240/1109/51495/200895/3995/1066/5563/5352/242/2806/5825/113675/2747/2746/440/5166/58478/2678/1558/570/10005/9200/256987/134429/9444/2571/7923/2946/6850/116285/2181/122970/9415/9965/127281/80270/84105/337/1581/11343/247/10062/283985/23498/23600/4258/22937/1576/114883/2944/10994/2593/84696/653308/9926/2879/1571/47/1491/15…
GO:0046395	carboxylic acid catabolic process	204	-0.311875	-366316438809754	48.8842	13611.8	10633.6	6683	tags=72%, list=46%, signal=40%	2653/51166/10999/10157/390916/8528/8564/10295/23464/26063/6472/5446/883/132789/1056/9663/84879/23659/2806/5825/34/113675/2747/2166/1381/2746/35/144193/10005/197257/2875/2571/5226/414328/122970/5625/254552/205251/51005/5828/160428/66002/83667/2110/3295/8660/3712/10455/23498/10588/23600/208/3032/10994/84696/89874/3667/8529/191/2108/55862/1891/54905/84830/1610/4942/5009/2168/3176/84129/1962/157739/6…
GO:0046434	organophosphate catabolic process	132	-0.185119	-189343011533529	0.00314558	0.0301178	0.0235282	5037	tags=48%, list=34%, signal=32%	55276/10924/254552/3251/53343/284161/5150/5152/10591/57406/79887/8654/4860/100/27124/4952/5321/22978/57089/3613/22876/54928/1806/10380/5728/5141/283927/2819/3633/8898/25939/222236/955/25961/11332/375775/339221/2272/3632/8821/5169/5151/949/55512/953/38/9588/11165/51733/26090/5167/7498/8398/23171/3417/5336/128486/272/8871/957/123745/4968/3990/51071
GO:0046486	glycerolipid metabolic process	328	-0.216479	-28737259170875	228503	3.63581e+07	2.84031e+07	5086	tags=52%, list=35%, signal=35%	10555/747/2181/114879/6720/5333/55224/5781/4534/285172/284161/80339/84803/9514/131118/337/11145/6400/5159/9306/13/11343/9651/83394/57406/10062/253430/85465/23682/5289/23259/5287/80055/126969/7148/9926/1571/3991/5293/55326/27124/5331/64419/728233/4952/55361/4204/9487/93210/5321/5295/81490/718/23167/1436/345/5833/3613/10162/1606/376497/160851/256356/9971/22876/54928/10554/54545/2784/472/10380/5728/…
GO:0046700	heterocycle catabolic process	383	0.133953	190582242427337	0.00118608	0.0155785	0.01217	4888	tags=43%, list=33%, signal=29%	6741/56339/8531/90806/9567/8930/10921/9238/51154/54915/55181/22894/9775/200035/1543/9939/65080/6832/1774/23404/1655/246243/54855/9704/2521/8882/7378/5433/85441/54658/54888/3669/23049/8761/55603/2931/5511/80149/22916/55629/54542/65109/55596/79072/115572/2107/5436/23658/51025/125061/1267/9583/10984/1890/4116/53918/677/79675/25804/8313/201626/9125/215/9513/3094/23583/154197/51690/6041/6996/4615/7967…
GO:0046777	protein autophosphorylation	181	-0.186553	-211328303491174	0.000555567	0.00923569	0.00721496	5515	tags=50%, list=38%, signal=32%	10111/9833/4361/6850/2872/57551/5292/5605/7301/1020/2050/5062/5159/9625/84451/6789/54822/91/2043/9261/50488/6793/808/7525/1455/92597/7443/8550/65125/6790/1636/4215/25/4140/1436/5566/4683/7006/1612/1859/801/4921/5595/5610/472/11200/5170/11261/5593/8805/4293/79834/7867/5587/2534/440275/2185/2066/2869/3643/29904/817/23043/5747/3480/1956/2241/613/2263/6714/56034/10783/10040/4067/5613/27347/5167/6792/…
GO:0048588	developmental cell growth	167	-0.188183	-208911809325823	0.000608475	0.00968171	0.00756339	4436	tags=45%, list=30%, signal=32%	6405/9150/6259/8766/8239/3275/9043/25942/80208/5802/65059/4137/10371/10611/23105/10479/6416/6790/10512/25/51199/50618/5361/27185/57609/2803/6857/5465/2016/57698/2258/1808/5071/57715/1954/2335/23499/9856/11214/7528/1785/440275/54437/2131/8470/23242/26999/1002/23327/5590/9962/10507/114804/127833/659/9472/10500/4035/9037/4897/51299/51760/6792/26053/22902/5058/2932/7074/2475/23191/9175/351/183/214/26…
GO:0048638	regulation of developmental growth	227	-0.186819	-226214859729797	7.16248e+08	0.0019363	0.00151265	4451	tags=45%, list=30%, signal=32%	10370/6405/9150/6259/6789/8766/891/55841/55636/1852/9043/25942/2593/5591/5802/983/583/4137/10371/51316/23105/10413/367/4208/10512/80014/25/50618/27185/57609/3481/825/2803/5594/6857/5467/5465/7093/5728/57698/8879/375790/1432/2258/1808/5071/8292/57715/1954/2335/23499/9856/7490/5727/3516/7528/2627/5357/1785/10743/54437/2066/85407/3643/79068/1002/2690/23327/23236/32/8455/9962/7049/10507/114804/6532/9…
GO:0048812	neuron projection morphogenesis	429	-0.201456	-283058185623125	31219	7.55906e+06	5.90517e+06	4902	tags=48%, list=33%, signal=33%	9637/5781/3984/1942/1020/3251/57556/1943/2050/9448/5062/4908/4781/10013/7155/1813/6093/4205/473/115703/1944/6405/6259/57463/79600/27020/8766/5789/284217/8997/8322/2043/100532736/285220/50488/11178/23022/5864/8239/55740/9043/25942/126147/80208/5802/65059/387/128434/4854/2297/4137/10371/9912/84079/10611/10458/23105/10479/7976/6091/23390/538/6790/10512/9693/7368/1139/7436/25/10152/51199/5818/50618/2…
GO:0048854	brain morphogenesis	27	-0.4345	-241598037800258	0.000161468	0.0034989	0.00273335	3781	tags=63%, list=26%, signal=47%	583/8323/7976/738/6654/2016/5728/5663/79925/85358/23291/151449/2309/2176/6532/6608/4763
GO:0048858	cell projection morphogenesis	447	-0.201706	-289283019515532	35932.1	8.14524e+06	6.3631e+06	4902	tags=48%, list=33%, signal=33%	9637/5781/3984/1942/1020/3251/57556/1943/2050/9448/5062/4908/4781/10013/7155/1813/6093/4205/473/115703/1944/6405/6259/57463/79600/27020/8766/5789/284217/8997/8322/2043/100532736/285220/50488/11178/23022/5864/8239/6643/55740/9043/25942/126147/23603/80208/5802/6642/65059/387/128434/4854/2297/4137/10371/9912/84079/10611/10458/23105/10479/7976/6091/23390/538/6790/10512/9693/7368/1139/7436/25/10152/51…
GO:0048871	multicellular organismal homeostasis	363	-0.128779	-176055018792357	0.00303243	0.0295755	0.0231045	5105	tags=44%, list=35%, signal=29%	3600/93/166379/1051/169200/23371/22954/9456/5781/3549/66002/6556/2055/221395/1813/58488/5567/358/71/5881/57406/128866/10062/9975/7033/53832/3915/1280/3690/361/387597/27134/50848/8862/9153/583/8529/64641/5175/51316/5025/580/11272/10413/9414/55366/23028/283455/7018/3606/9455/55198/79152/29841/6584/284/4237/1436/51085/5566/284207/55812/3953/84059/376497/6121/25937/26058/124590/7466/6513/5746/4012/96…
GO:0050803	regulation of synapse structure or activity	136	-0.20886	-215962188427481	0.000577676	0.00940666	0.00734852	4909	tags=49%, list=33%, signal=33%	9456/1942/1020/2904/1813/387804/115703/6405/58489/57463/5789/55209/64084/2043/79414/5802/203068/387/55752/9912/22859/10611/10458/4208/25/10082/10152/5818/27185/102/6453/9762/25791/3556/4976/55638/5728/3706/375790/9746/1432/8292/85358/64284/8831/80725/1605/2534/79012/153090/10160/26037/29904/10507/7097/55607/9231/4038/2048/23613/57549/6792/7074/22883/23191/351/4734
GO:0050804	modulation of chemical synaptic transmission	275	-0.168512	-212691405590984	0.000164927	0.00355999	0.00278108	4661	tags=44%, list=32%, signal=31%	2904/1524/4908/1143/84687/1813/2905/409/57406/27020/25897/27345/8766/5789/64084/2043/11178/54434/5864/51304/6780/5802/112476/808/57596/4137/3710/10458/1759/4204/4208/6455/9693/25837/1139/25/27185/94056/5566/57338/23208/5906/801/41/5594/6857/9783/55638/10590/5728/3706/26059/5663/9746/5071/4983/85358/8898/11252/84961/8831/2900/54899/2534/3745/440275/2185/25953/999/29/2898/5786/22941/26037/55784/114…
GO:0050807	regulation of synapse organization	130	-0.215162	-218948287690075	0.000669303	0.0104407	0.00815635	4909	tags=50%, list=33%, signal=34%	9456/1942/1020/2904/1813/387804/115703/6405/58489/57463/5789/55209/64084/2043/79414/5802/203068/387/55752/9912/22859/10611/10458/4208/25/10082/10152/5818/27185/102/6453/9762/25791/3556/4976/5728/3706/375790/9746/1432/8292/85358/64284/80725/1605/2534/79012/153090/10160/26037/29904/10507/7097/55607/9231/4038/2048/23613/57549/6792/7074/22883/23191/351/4734
GO:0050821	protein stabilization	168	0.167179	187306770688162	0.00482532	0.0394006	0.0307799	6328	tags=55%, list=43%, signal=32%	66036/55664/908/6950/23252/7157/56658/10694/51125/11040/573/2316/51616/23560/3320/25764/9919/84447/84897/11140/10869/3326/336/22948/89781/5190/10576/57602/3920/5245/9529/10574/7203/7248/10910/1191/23515/11315/819/92162/482/84515/60485/7428/5479/79155/389856/6880/7756/58525/10211/125150/9532/79594/64844/9531/6201/83548/11235/54997/1857/56912/57142/3054/483/8774/2033/5580/7917/4092/5216/3916/7480/1…
GO:0050892	intestinal absorption	32	-0.417083	-246692600705867	9.20037e+09	0.00228736	0.0017869	6361	tags=84%, list=43%, signal=48%	335/7357/1056/7430/7429/65010/337/50848/3784/9414/2168/10162/1582/1645/29881/5357/7421/51474/339221/2035/6523/80168/949/6518/2169/48/8435
GO:0051028	mRNA transport	117	0.30539	305151297747792	5.12274e+06	5.09439e+08	3.97976e+07	3805	tags=52%, list=26%, signal=39%	79228/53371/7884/55421/9775/9939/9818/6830/6432/7919/5433/54888/10762/10482/23049/26097/23511/91746/2733/22916/1984/65109/5903/8480/11097/23279/100101267/29890/26993/4116/8106/8888/677/55308/7514/84248/56648/55916/6426/10212/55795/25909/65110/10189/7538/23381/5976/8086/4927/56943/79902/81929/4686/6428/8570/7175/22794/1070/10642/1660/143244
GO:0051046	regulation of secretion	432	-0.136104	-192123465478969	0.000689527	0.0105819	0.00826664	6384	tags=55%, list=44%, signal=32%	654/28964/1588/6845/6810/5478/8564/322/134957/2697/5481/240/6781/22930/7042/5020/522/8912/1066/10312/29085/2149/1731/5898/7784/242/51738/7132/5874/7430/2746/5532/8673/3071/101/9619/10961/286676/7779/8027/23557/23607/375/54795/5019/6850/8754/1908/3767/27230/3684/1385/27236/4218/51762/2181/94121/6720/3162/5781/3651/1020/91608/4881/8913/9448/2029/1143/1813/8660/358/80223/3418/27345/10062/650/5029/55…
GO:0051051	negative regulation of transport	311	-0.142417	-187261902067386	0.00164409	0.0191948	0.014995	6384	tags=52%, list=44%, signal=30%	2697/254263/26060/55529/6781/5020/522/9711/3998/2149/29763/51738/7132/10434/5569/347/51719/80762/8673/3071/91319/55612/8301/10961/2775/7779/2946/2859/10347/596/51465/3767/27236/4946/57520/94121/6720/3162/5781/1020/54602/257364/7341/10399/9448/20/1813/9882/8660/7531/2056/80223/3418/88455/10062/285966/6672/208/3690/3667/112476/808/100/8529/5978/55022/4790/84079/91404/90678/580/84830/10681/65125/631…
GO:0051056	regulation of small GTPase mediated signal transduction	251	-0.238199	-296802775259592	303603	4.22691e+07	3.30208e+07	5410	tags=55%, list=37%, signal=35%	23607/26030/10603/23268/2859/3675/9928/2245/100271927/84033/5894/50649/10156/55667/1124/5962/57221/9448/5159/23636/9938/2056/2305/7249/57636/8997/29127/10564/50848/64787/50619/94134/9912/55914/22898/51306/55103/9824/6091/51571/25/55200/345/202243/6655/6453/79822/25791/89846/6654/55114/5909/10260/55701/116985/154796/80728/22821/9826/57584/117178/4983/9289/23365/57480/408/8831/11214/56990/10451/235…
GO:0051085	chaperone cofactor-dependent protein refolding	31	0.38869	23326617564288	0.000511443	0.00871976	0.00681192	3148	tags=52%, list=21%, signal=41%	6782/1861/3313/27348/573/51182/10808/27433/3306/79982/11080/972/6388/7266/3337/25822
GO:0051131	chaperone-mediated protein complex assembly	19	0.422357	202925945490624	0.0055327	0.043703	0.0341409	6321	tags=63%, list=43%, signal=36%	84262/3320/51103/3326/10576/1191/79738/3308/10273/8195/10471/3303
GO:0051169	nuclear transport	267	0.189955	245927639567672	3.46075e+08	0.00017208	0.000134429	3795	tags=40%, list=26%, signal=31%	6741/79228/5936/53371/26953/9670/7157/6059/55696/3313/10553/65083/9818/2316/6830/7919/5514/5901/8882/5433/27351/1408/54888/55781/10762/3838/161424/10482/9221/55341/23049/26097/51068/23511/91746/6469/80149/2733/22916/65109/5903/8480/30000/11097/3326/23279/3840/100101267/1026/29890/2810/51547/129138/55374/26993/8106/2010/8888/10155/11052/4000/55308/7514/84248/55153/7248/55705/55916/84946/10212/1131…
GO:0051271	negative regulation of cellular component movement	222	-0.151633	-182223264309745	0.00556894	0.0438043	0.0342201	4995	tags=43%, list=34%, signal=29%	1800/3162/23213/29956/7168/1524/90355/1813/647135/10370/247/3418/57406/6672/2043/100532736/23603/100/387/10014/11240/10371/4301/84830/4204/4208/6091/23598/374969/25932/149461/4286/9466/202243/2192/5467/56940/22998/5728/114882/23122/196528/9289/7481/55333/57522/4771/79148/274/2309/1605/286205/90102/153090/999/811/51466/5795/5796/5797/5607/23236/5793/79890/199/56999/7049/23332/10076/9231/2768/657/5…
GO:0051279	regulation of release of sequestered calcium ion into cytosol	52	-0.28363	-205803263693496	0.00254463	0.0260442	0.0203458	3207	tags=46%, list=22%, signal=36%	25/5566/57338/2147/6375/825/801/9474/55151/5170/6546/6717/1756/5587/2185/287/57158/817/3064/9472/4067/9446/5581/6262
GO:0051289	protein homotetramerization	39	-0.317237	-202353373818412	0.00253366	0.0259852	0.0202997	5449	tags=64%, list=37%, signal=40%	6261/54795/54974/3251/6648/10600/361/1491/55198/223/9885/51074/1429/55856/25939/51466/32/89872/6470/31/23373/51733/7442/4143/64784
GO:0051592	response to calcium ion	113	-0.255291	-245018839157874	2.08877e+09	0.000750475	0.000586275	3435	tags=46%, list=23%, signal=36%	4208/65125/7222/3727/25932/6382/825/23208/8895/801/84059/6857/673/8644/57586/22872/79800/360/4547/339/955/2039/2185/6786/29904/817/4519/63928/5530/1956/79085/127833/9066/4331/2822/107/241/3778/51760/8604/144402/6331/5336/118/10165/7273/221184/4734/311/3707/30819/6262
GO:0051648	vesicle localization	151	-0.180755	-194427800120351	0.00329404	0.0309351	0.0241666	6273	tags=55%, list=43%, signal=32%	2647/4644/10312/3985/84100/8976/5874/4641/64149/23513/8943/8301/4647/5048/23557/66008/375/92558/83930/10239/1020/118426/54874/8766/5864/54820/10342/80208/10749/5861/583/1759/9230/26985/23208/51168/81/9371/4935/55638/5728/10972/27445/55062/11261/22906/5663/23122/4033/8263/51128/5071/5873/64284/55686/23291/4646/1001/1785/4642/4645/23233/60412/5590/3064/63971/54536/23332/8546/357/8825/4640/79443/840…
GO:0051660	establishment of centrosome localization	10	-0.547017	-195637570054694	0.00397576	0.0345413	0.0269838	6654	tags=100%, list=45%, signal=55%	7430/5048/4085/29109/51134/1739/56288/117583/5314
GO:0055017	cardiac muscle tissue growth	57	-0.27344	-205355088495248	0.00196436	0.0215769	0.016856	4451	tags=54%, list=30%, signal=38%	10370/9150/891/983/10611/10413/6416/4208/5594/5465/5728/1432/196528/11214/3516/7528/2627/2066/8470/7049/9686/2263/657/3720/9472/7161/5058/2475/57493/183/2626
GO:0055086	nucleobase-containing small molecule metabolic process	465	-0.192939	-279641191619159	246178	3.70532e+07	2.89461e+07	6324	tags=58%, list=43%, signal=34%	197258/226/132789/522/200895/10020/4199/5563/79077/954/5143/55790/5198/6820/158067/5635/11163/112/641371/4913/26027/7167/5138/57678/10135/554235/5166/133686/6901/570/5631/10005/64841/50484/5744/9200/2584/509/518/116285/5373/51703/23305/2592/2181/122970/144811/6675/10924/4351/6240/254552/22875/51005/3251/2617/5372/53343/5150/4881/5152/10591/863/2984/122622/142/1738/3099/84433/256281/122481/113/836…
GO:0055088	lipid homeostasis	125	-0.230237	-229351853023986	0.000178349	0.00380546	0.00297284	4780	tags=50%, list=33%, signal=34%	5424/80339/1050/2055/20/337/1581/83667/8660/6095/10062/9975/22913/2646/29099/3606/123876/51085/7392/345/10087/9971/433/1645/285848/2494/4547/63892/7851/2538/6721/114899/8309/7494/51474/339221/57476/21/2053/340895/949/27346/148534/31/3638/25987/19/4041/338/6296/255738/3694/23461/57143/84649/128486/8435/8310/84647/3172/158219/5468/3990
GO:0060045	positive regulation of cardiac muscle cell proliferation	16	-0.506447	-221952730776395	0.000674268	0.0104703	0.00817947	4996	tags=81%, list=34%, signal=54%	5292/891/983/10413/4208/5594/1432/3516/2627/2066/7049/2263/657
GO:0060236	regulation of mitotic spindle organization	34	0.302305	189671771157465	0.00663484	0.0490045	0.0382825	6492	tags=74%, list=44%, signal=41%	51510/57132/8480/27243/29899/79998/10039/3192/25978/1639/256364/5347/9525/7175/1778/79187/2770/5119/126731/92421/4733/3304/79866/3303/1213
GO:0060348	bone development	153	-0.168185	-181637674415495	0.00549533	0.0434708	0.0339596	6737	tags=60%, list=46%, signal=33%	202018/5308/55294/654/10163/5447/2697/645811/4664/6781/7471/51738/302/871/4211/1305/10006/642658/5048/6261/5914/124565/9249/23213/5781/3549/4086/139285/6886/10370/650/100533183/7704/1280/387/171023/64175/22856/4208/51360/5358/4487/8642/79648/54928/55151/1432/133308/1954/5915/56987/161882/11214/29887/27086/26160/57560/7052/1101/1112/2131/4015/54808/64131/285590/2690/2132/10507/55512/2263/84068/671…
GO:0060413	atrial septum morphogenesis	10	-0.592475	-211895502541927	0.00119699	0.0156113	0.0121956	2035	tags=70%, list=14%, signal=60%	161882/90/659/7468/4853/6608/2626
GO:0060547	negative regulation of necrotic cell death	15	0.48901	211326289997323	0.00237341	0.0247057	0.0193002	5808	tags=80%, list=40%, signal=48%	8531/329/9181/8737/57162/291/8996/7349/407006/330/8772/857
GO:0060560	developmental growth involved in morphogenesis	167	-0.161118	-178865591517872	0.00621733	0.0474771	0.0370893	4436	tags=43%, list=30%, signal=30%	6405/6259/8766/8239/9043/25942/80208/5802/65059/57669/4137/10371/23105/10413/10479/157506/6790/10512/25/51199/50618/5361/27185/57609/2803/6857/2016/57698/2258/1808/5071/57715/1954/2335/23499/9856/7481/5754/1785/440275/54437/85407/2131/23242/26999/1002/23327/5590/9962/10507/114804/55083/127833/2263/659/10500/4035/9037/4897/51299/51760/6792/26053/22902/5058/2932/7074/23191/9175/351/214
GO:0060612	adipose tissue development	31	-0.350767	-204810126046671	0.0030711	0.0297961	0.0232768	5948	tags=74%, list=41%, signal=44%	51738/10424/5290/54795/5019/139285/11145/64641/9517/84159/5467/7494/79068/285590/6653/65985/9658/38/4041/84649/8609/1386/89766
GO:0061136	regulation of proteasomal protein catabolic process	175	0.196702	224837311663466	0.000374127	0.0066994	0.0052336	5338	tags=51%, list=36%, signal=33%	5706/1454/55743/116224/10769/5702/56893/56658/57805/3300/1263/10197/5701/57095/5721/27351/90637/5705/122809/5704/6386/51667/9810/2931/6469/64285/10869/3326/51548/10425/9529/5716/7514/9604/10221/29979/23376/2876/1191/11315/10213/819/8473/26263/5700/11146/79016/1017/114881/2629/11345/9978/6880/7110/4287/55212/4780/144165/5347/1453/9532/11337/9817/10134/64844/28951/25831/6815/5886/6449/7314/5582/233…
GO:0061572	actin filament bundle organization	133	-0.224145	-229168725163019	0.000208515	0.00433691	0.00338801	4991	tags=53%, list=34%, signal=35%	25794/7184/3984/7168/5962/5062/6093/71/100533183/55971/85462/50848/387/6281/10979/55616/10458/29109/5295/25/5358/11346/83715/79822/4082/22998/116985/57698/23122/10083/5074/5071/3936/85358/56907/5345/408/7481/4771/5357/90102/55160/51474/2039/2185/23370/51466/3693/55604/10580/199/84952/23332/9788/6714/55607/221061/5217/9124/359845/1902/87/4739/5058/2475/7840/118/4430/4088/800
GO:0062012	regulation of small molecule metabolic process	251	-0.151829	-189183874495859	0.00163366	0.0191131	0.0149313	5074	tags=46%, list=35%, signal=30%	2672/144811/3487/6720/9965/7874/205251/27122/863/337/1581/83667/142/8660/8671/64801/6095/10062/7033/650/22937/208/3667/9926/1594/3607/5978/55022/4790/2646/405/157506/51360/1353/2168/55198/51085/56848/345/57223/3481/10162/5164/3953/9971/10613/1312/5467/5465/2784/51422/8720/8644/9611/85414/57486/5771/10464/5663/2819/5071/9563/1374/978/114899/5745/57001/2185/2023/3643/9612/171425/32/10580/5165/2053/…
GO:0070085	glycosylation	196	-0.179462	-207868336217575	0.000452767	0.00790427	0.00617485	5579	tags=52%, list=38%, signal=32%	91319/29929/7841/27090/11227/66008/58505/4122/56913/5373/80235/51465/27230/6483/3600/4351/11041/5372/282969/20/9514/79644/51172/286148/256281/147991/56886/84892/2524/143888/84002/23509/84061/2137/79087/29071/8706/5238/201595/84197/2218/57134/29954/727936/282679/9334/54790/2673/55757/11226/4247/10905/7423/79695/11261/57452/22906/5663/93010/93183/57511/4248/51809/123264/8869/84899/2651/2131/2590/42…
GO:0070198	protein localization to chromosome, telomeric region	28	0.470711	269268318424849	3.01345e+09	0.00099301	0.000775744	2577	tags=61%, list=18%, signal=50%	55135/54386/908/6950/10694/7014/26354/675/22948/1200/10576/54552/10574/7203/80351/1736/545
GO:0070588	calcium ion transmembrane transport	190	-0.21269	-246403134620338	1.82336e+09	0.000682837	0.000533435	6199	tags=58%, list=42%, signal=34%	8912/25998/116444/2149/57419/302/9187/162514/79041/246329/6261/2280/84876/2946/2859/54795/5310/799/56704/1020/1729/490/8913/2904/53373/1813/2905/7531/117155/54822/27032/159371/55636/221154/808/6271/3710/5025/91404/84766/168507/10681/219931/8065/7222/1139/25/5566/57338/9722/2147/6375/825/801/41/9474/4976/63933/55151/5170/26133/22821/5663/91689/6546/6717/27075/1756/140738/140803/57113/274/63892/558…
GO:0070633	transepithelial transport	27	-0.349894	-19455389919224	0.00472715	0.0389648	0.0304395	7207	tags=85%, list=49%, signal=43%	1525/7439/5030/6507/5031/9429/1365/65010/358/71/57127/149461/1910/9963/60/1080/4363/6523/9962/1244/2822/3708/6505
GO:0070839	metal ion export	31	-0.372774	-217659517529719	0.00125676	0.01588	0.0124055	4816	tags=65%, list=33%, signal=43%	490/6556/8671/7531/159371/808/3784/538/3757/801/6546/476/1739/481/3752/30061/540/196527/493/30819
GO:0071166	ribonucleoprotein complex localization	70	0.399934	335725444801784	3.42641e+06	3.81634e+08	2.98134e+08	5205	tags=71%, list=35%, signal=46%	6741/79228/6059/65083/6830/7919/5901/5433/54888/55781/161424/10482/55341/23049/26097/51068/91746/2733/8480/23279/29890/26993/8106/8888/55308/7514/84248/55153/7248/84946/10212/55795/10189/23381/5976/4927/56943/79902/4686/6428/26121/7175/84324/3692/55677/23212/6209/11260/9887/84271
GO:0071277	cellular response to calcium ion	60	-0.303357	-231540286925225	0.000414381	0.00732599	0.00572309	3435	tags=50%, list=23%, signal=38%	4208/65125/3727/25932/825/23208/8895/84059/6857/673/8644/57586/79800/2039/29904/817/63928/79085/127833/9066/2822/107/241/51760/144402/6331/5336/118/221184/3707
GO:0071333	cellular response to glucose stimulus	111	-0.204503	-195345949509698	0.00315736	0.0301178	0.0235282	3107	tags=39%, list=21%, signal=31%	51085/5566/7776/9971/4976/6597/5467/55638/57539/5105/5106/133308/6717/55450/55107/1080/2309/3745/5799/7494/10497/3480/5530/252983/5165/7447/65985/91942/9324/2822/4041/111/4035/25874/8398/2621/7074/9024/8609/26056/23516/5581/2626
GO:0071407	cellular response to organic cyclic compound	426	-0.130227	-183833672027557	0.00107717	0.01456	0.0113744	5041	tags=42%, list=34%, signal=29%	9177/1051/688/5292/6569/7184/161582/4086/1729/490/3309/26508/8932/80339/1050/65010/1789/29966/5062/1581/142/10013/84687/1813/358/409/10919/6095/4869/5585/81930/891/2774/650/5029/54434/23019/3169/3275/25942/10524/8725/1594/84458/387/4848/5978/11240/4790/3352/5025/3784/10413/84830/10681/116151/8289/7332/23028/367/4208/3157/890/54762/9693/3606/25/5566/8204/81606/10498/5906/4040/23367/5594/5595/9971/…
GO:0071417	cellular response to organonitrogen compound	453	-0.195876	-281965972165921	208499	3.41508e+07	2.66788e+07	6653	tags=60%, list=45%, signal=34%	9475/6507/5031/8787/10999/1979/5296/84861/5829/6776/2729/54741/5447/2697/26060/6781/26/57657/5156/3184/4644/840/1288/80315/9663/7471/6667/51617/324/51738/112/4641/7430/3484/54464/5138/57026/79041/57085/340706/10135/837/5166/2642/1663/2775/2875/51043/5290/6261/2946/10603/1291/54795/5064/5888/8767/1131/1385/4218/58533/51762/9177/1051/688/6569/6720/7184/23371/5781/55667/1020/1729/490/3309/80339/6501…
GO:0071426	ribonucleoprotein complex export from nucleus	69	0.396103	330174260908871	8.64891e+06	7.41012e+08	5.78882e+08	5205	tags=71%, list=35%, signal=46%	6741/79228/6059/65083/6830/7919/5901/5433/54888/55781/161424/10482/55341/23049/26097/51068/91746/2733/8480/23279/29890/26993/8106/8888/55308/7514/84248/55153/7248/84946/10212/55795/10189/23381/5976/4927/56943/79902/4686/6428/7175/84324/3692/55677/23212/6209/11260/9887/84271
GO:0071692	protein localization to extracellular region	270	-0.166594	-209767565580919	0.000233451	0.00469346	0.00366655	5685	tags=50%, list=39%, signal=31%	2746/5532/101/9619/10961/5048/173/22820/23607/375/54795/5019/8754/3767/27230/201158/27236/4218/51762/94121/6720/5894/5781/3651/9448/2029/6400/51172/84315/1813/8660/80223/3418/10062/4053/100532736/93145/55204/79971/5289/5864/8431/3667/387597/5978/9854/9230/64175/84830/6927/374969/51768/5211/9971/84976/5467/4087/55638/64083/10972/27445/55691/8736/5106/9601/133308/399687/6717/114131/55450/9545/5071/…
GO:0071763	nuclear membrane organization	31	0.338207	202969756134271	0.00374115	0.0335499	0.0262093	3222	tags=52%, list=22%, signal=40%	81565/79188/1861/27348/91782/23141/27243/26993/2010/80346/23306/26092/23435/1639/27183/5347
GO:0071772	response to BMP	114	-0.216658	-208640078427748	0.000868649	0.0125324	0.00979036	5771	tags=56%, list=39%, signal=34%	3209/51176/64750/642658/9958/168667/92/3675/64102/93/283375/23213/4086/26508/3096/94031/348093/5654/100532736/375616/650/8239/1280/390598/79176/63893/9197/2297/2719/57045/51496/25/51232/4487/5595/4087/4091/222223/1954/151449/90/3516/2627/3077/4036/2131/4756/5046/28996/7049/353500/656/6653/55512/659/657/4853/25928/6497/4088/4926/5468/2626/27250
GO:0071773	cellular response to BMP stimulus	114	-0.216658	-208640078427748	0.000868649	0.0125324	0.00979036	5771	tags=56%, list=39%, signal=34%	3209/51176/64750/642658/9958/168667/92/3675/64102/93/283375/23213/4086/26508/3096/94031/348093/5654/100532736/375616/650/8239/1280/390598/79176/63893/9197/2297/2719/57045/51496/25/51232/4487/5595/4087/4091/222223/1954/151449/90/3516/2627/3077/4036/2131/4756/5046/28996/7049/353500/656/6653/55512/659/657/4853/25928/6497/4088/4926/5468/2626/27250
GO:0071805	potassium ion transmembrane transport	107	-0.199003	-18820761525075	0.00423359	0.036328	0.0283796	5954	tags=53%, list=41%, signal=32%	57419/9187/27094/3766/79041/51719/1908/3767/170850/54207/7341/23415/3780/358/60598/7531/57463/27345/3760/57582/3784/10479/65125/3249/10723/3757/9722/3773/6550/5728/55151/10060/476/274/1785/3745/1739/481/9990/287/776/11060/23327/3752/288/84561/9472/196527/3778/6549/27347/84679/8514/65268/10142/4734/30819
GO:0071816	tail-anchored membrane protein insertion into ER membrane	17	0.504505	230430552330751	0.000766293	0.011441	0.00893774	5535	tags=88%, list=38%, signal=55%	55831/56851/51234/83460/51016/819/23065/51608/439/6449/10328/7917/284361/93380/8266
GO:0071824	protein-DNA complex subunit organization	171	0.167044	189334064975421	0.00390805	0.0343056	0.0267997	2984	tags=33%, list=20%, signal=26%	79003/2960/8367/6883/5706/2959/8353/23234/7157/6046/29855/6830/54623/11198/54107/54700/64061/80152/6603/6908/9013/8345/10847/83743/6418/8365/144108/6662/8339/55290/55011/10467/8888/9733/3017/1810/201254/8362/8357/8467/8356/7259/8344/8364/3146/7343/440689/2958/6878/8341/3159/3014/4609/6879/6880/6604
GO:0071826	ribonucleoprotein complex subunit organization	189	0.355495	411891909090833	0.0228899	9.10527	7.11308	5989	tags=72%, list=41%, signal=43%	23064/79869/10594/8664/26835/51154/6633/64963/55299/27341/24144/10978/1983/7919/6637/22889/3320/8669/5433/10772/10569/8668/25980/9129/10419/9416/23020/56342/8662/11171/91746/55015/10421/29777/3326/83640/55794/10946/28985/55011/50628/9733/25804/51340/11218/10181/11052/6431/24148/6426/6152/4809/54475/121053/8894/9092/101954267/26284/6628/8562/56949/4839/51081/22907/11051/9326/545/54505/6895/55052/3…
GO:0090066	regulation of anatomical structure size	373	-0.137064	-188743031788362	0.00144207	0.0176503	0.0137885	5941	tags=49%, list=40%, signal=30%	8976/56920/112/4641/7430/57026/80852/256949/223117/84501/3071/50853/8301/5048/5290/64223/7429/375/83547/57731/54795/7869/1131/1908/1385/27236/53841/3984/1020/57556/490/4881/5962/6648/2055/6093/10456/358/6405/6259/4869/114908/27345/8766/5029/54434/9732/55971/25942/7111/361/5802/8862/2885/387/4137/10371/1207/3352/171023/10458/23105/133746/128239/23028/6712/538/1636/10512/51571/51429/10723/2934/25/1…
GO:0090077	foam cell differentiation	25	-0.41576	-220855919479285	0.000576692	0.00940666	0.00734852	4383	tags=60%, list=30%, signal=42%	247/10062/3690/4790/3606/5465/5583/5601/4481/19/338/23461/8435/183/5468
GO:0090407	organophosphate biosynthetic process	465	-0.198074	-287082929780152	36565.1	8.14524e+06	6.3631e+06	4851	tags=48%, list=33%, signal=33%	3251/2617/4534/285172/80339/4881/84803/2984/20/221395/11145/122622/79644/142/1738/9306/122481/113/83666/23262/159/83394/3418/253430/23498/85465/23682/10654/4337/5289/4860/5287/3000/80055/126969/2224/9926/8833/100/47/55312/5293/55326/27124/55022/64419/166929/4598/728233/51727/1503/4952/55163/54981/55361/498/3157/9487/9524/93210/5634/523/5321/5295/9517/81490/10606/5636/4338/23167/6241/23181/56848/5…
GO:0090659	walking behavior	21	-0.395266	-197620458177252	0.00554821	0.043703	0.0341409	5875	tags=71%, list=40%, signal=43%	1949/3766/1497/57731/2055/1813/409/2043/55636/80208/23287/57626/1600/28996/26090
GO:0090671	telomerase RNA localization to Cajal body	19	0.480632	230924389689899	0.000913223	0.0129368	0.0101063	2850	tags=63%, list=19%, signal=51%	55505/55135/908/6950/10694/22948/10576/10574/7203/1736/5394/167227
GO:0097164	ammonium ion metabolic process	13	-0.510935	-204527817510124	0.0036234	0.0329718	0.0257577	3335	tags=69%, list=23%, signal=54%	538/3176/6581/55349/114781/23446/1119/1644/501
GO:0097305	response to alcohol	177	-0.186683	-211947099622648	0.000664014	0.0103873	0.00811464	4682	tags=46%, list=32%, signal=32%	6648/20/2904/1581/142/1536/84687/1813/113/10919/10654/8431/1571/808/983/387/3248/3157/54762/1978/56848/4040/23367/801/1582/80854/5465/4087/8644/5728/3283/64083/2720/1938/109/9131/114131/6554/1080/9563/5727/2309/339/1605/1374/2534/2230/2185/999/18/23514/57476/4255/4538/4519/7292/9962/7049/847/4129/65985/2263/31/19/2822/3709/107/2155/111/55915/2782/10400/1646/6608/210/7298/64854/5581/4968/1495/761
GO:0097306	cellular response to alcohol	69	-0.308395	-249657651977515	0.000132163	0.00303621	0.0023719	3371	tags=48%, list=23%, signal=37%	3157/54762/56848/4040/23367/8644/5728/64083/109/9131/1080/5727/2309/1605/2230/999/23514/57476/7292/9962/65985/31/19/2822/3709/107/111/55915/2782/1646/6608/5581/1495
GO:0098657	import into cell	147	-0.204032	-217362695053798	0.000657022	0.0103069	0.0080518	5926	tags=55%, list=40%, signal=33%	9187/55630/162514/6509/3766/79901/3177/7779/54795/51703/3767/799/2181/283375/6569/2055/6582/1813/8660/208/121260/3690/3760/3784/90678/2030/55244/10479/57181/65125/10723/3757/2058/3773/23428/261729/6573/376497/6513/6550/6526/10060/5663/6581/60/6546/5071/476/124935/3077/54492/2534/1739/1317/4036/481/9990/4891/6523/206358/6564/6532/11001/6518/2180/84561/6549/84679/6583/6536/7442/493/6541/65268/10550…
GO:0098659	inorganic cation import across plasma membrane	58	-0.302847	-227266746405153	0.000478572	0.00822582	0.00642604	5926	tags=66%, list=40%, signal=39%	9187/55630/162514/3766/7779/54795/3767/799/283375/6569/3760/3784/10479/57181/65125/10723/3757/3773/261729/6550/10060/6546/476/3077/2534/1739/1317/481/9990/6523/84561/6549/84679/6536/7442/493/65268/23516
GO:0098739	import across plasma membrane	113	-0.245641	-235756628095787	5.13688e+09	0.00146704	0.00114606	5926	tags=59%, list=40%, signal=36%	9187/55630/162514/6509/3766/7779/54795/51703/3767/799/283375/6569/2055/6582/8660/208/121260/3760/3784/55244/10479/57181/65125/10723/3757/3773/23428/261729/6573/376497/6513/6550/6526/10060/5663/6546/476/124935/3077/2534/1739/1317/4036/481/9990/6523/206358/6564/6518/2180/84561/6549/84679/6583/6536/7442/493/6541/65268/10550/59272/6533/8501/183/23516/6505/9368
GO:0098771	inorganic ion homeostasis	470	-0.198243	-287504356885427	53242.1	1.09817e+07	8.57894e+06	5954	tags=55%, list=41%, signal=34%	57419/51738/9187/7337/55630/162514/771/3766/1534/79041/8943/5166/80762/79901/8301/3163/7779/4494/6261/23557/2280/375/2946/2859/54795/55177/8614/5371/5310/596/1908/799/150159/56704/283375/144811/142680/6569/169200/7274/7184/205251/3162/1020/1729/490/66002/4881/65010/26872/6556/2904/1524/53373/1813/9114/2905/8671/7531/2056/27020/54822/23682/27032/159371/55636/51312/51076/118987/221154/1318/6358/653…
GO:0099024	plasma membrane invagination	48	-0.296523	-208736781460347	0.00112388	0.0149735	0.0116973	5620	tags=60%, list=38%, signal=37%	84501/3071/375/10347/3684/257364/286046/9938/389668/112574/387/94134/4627/23221/3689/51429/55198/2934/718/51411/56907/1793/199/4481/19/196527/5336/26762/51454
GO:0099536	synaptic signaling	426	-0.146092	-206229666583487	8.88392e+09	0.00225911	0.00176483	6688	tags=56%, list=46%, signal=31%	56125/991/6507/28964/5924/7416/1979/6810/8564/4909/134957/9381/5332/254263/9379/1959/22930/5020/1056/8927/51201/2569/7804/23394/2149/152404/10636/51738/9187/6196/1949/6509/392862/3766/2568/246329/5532/23513/5048/7779/23557/375/2571/590/116372/9495/5914/1131/56888/1385/4061/4218/747/9177/22839/2054/9456/1020/80331/8541/149111/8913/2904/1524/4908/1143/84687/1813/3780/2905/409/5881/9568/57406/27020/…
GO:0099565	chemical synaptic transmission, postsynaptic	60	-0.258382	-197212494325659	0.00426531	0.0364143	0.028447	4857	tags=53%, list=33%, signal=36%	1020/2904/1143/1813/2905/409/54434/5025/2030/10458/1137/4204/4208/6455/1139/1135/5728/1134/85358/8898/2185/18/2898/10497/5590/5530/55607/84866/23613/7442/2932/351
GO:0099587	inorganic ion import across plasma membrane	58	-0.302847	-227266746405153	0.000478572	0.00822582	0.00642604	5926	tags=66%, list=40%, signal=39%	9187/55630/162514/3766/7779/54795/3767/799/283375/6569/3760/3784/10479/57181/65125/10723/3757/3773/261729/6550/10060/6546/476/3077/2534/1739/1317/481/9990/6523/84561/6549/84679/6536/7442/493/65268/23516
GO:0099633	protein localization to postsynaptic specialization membrane	10	-0.59214	-211775558325656	0.00119699	0.0156113	0.0121956	3187	tags=80%, list=22%, signal=63%	10082/102/5906/1605/1739/5590/53616/23096
GO:0099645	neurotransmitter receptor localization to postsynaptic specialization membrane	10	-0.59214	-211775558325656	0.00119699	0.0156113	0.0121956	3187	tags=80%, list=22%, signal=63%	10082/102/5906/1605/1739/5590/53616/23096
GO:0106027	neuron projection organization	69	-0.26185	-211978288078602	0.0022947	0.0241573	0.0188718	6087	tags=61%, list=41%, signal=36%	7804/8976/7337/5048/375/3675/9456/1942/1020/2904/10013/115703/2043/9912/10611/10458/1139/10152/23181/102/9762/25791/4976/5728/3706/5663/85358/8898/80725/5357/2534/3643/26037/29904/3480/55607/85461/2048/23613/2932/7074/351
GO:0110148	biomineralization	111	-0.200623	-191639119878108	0.00475078	0.0389648	0.0304395	6653	tags=61%, list=45%, signal=34%	9475/654/130497/4077/645811/240/9451/10457/10312/57419/22904/9313/5744/92/10117/54795/93/9562/1051/3381/9923/54084/490/54959/6093/650/100533183/79176/1594/166929/54880/55366/2719/4208/197/5818/1230/84059/4921/5465/433/55151/6546/2308/1080/55589/7481/29887/90/57560/5745/2185/4015/6786/55512/2263/56172/659/657/5251/54757/359845/196527/5167/56975/2621/3694/4088
GO:0120031	plasma membrane bounded cell projection assembly	429	-0.148767	-209027427373225	4.04716e+09	0.00123162	0.000962146	6622	tags=56%, list=45%, signal=31%	10938/80776/55329/91147/79819/23580/10163/22994/84223/92482/22897/989/55704/55909/22873/148170/23116/755/8829/3985/84100/347240/10733/7471/5898/3911/54443/54903/138639/324/8976/83478/200894/27077/7430/25940/3766/374407/54970/55582/85452/83543/5290/23607/83547/83538/9480/118491/2245/5064/4218/9857/688/50649/161582/1183/5962/125488/23639/57216/90355/10013/27152/84687/54874/387804/9114/5420/80173/79…
GO:0120035	regulation of plasma membrane bounded cell projection organization	477	-0.136255	-198742434283205	0.00027868	0.00531497	0.00415208	3754	tags=35%, list=26%, signal=27%	84816/27124/25793/4137/10371/9912/84079/10611/10458/23105/64175/10413/9662/139818/23028/54986/6091/10300/538/10512/9693/5295/7436/2580/5376/10152/4919/51199/5361/27185/115704/79625/57609/57118/102/10498/9897/5906/9762/8087/2803/25791/10787/9474/5909/22876/4976/84260/5728/116985/3706/5604/57698/51626/22906/5663/375790/2258/10083/8724/54825/5205/57715/1954/8100/2335/85358/26259/23499/9856/26751/469…
GO:0140053	mitochondrial gene expression	106	0.297062	286283287581331	2.93393e+08	0.000152702	0.000119291	5729	tags=63%, list=39%, signal=39%	7019/122704/9238/64963/26164/65080/54931/57570/6832/3035/56652/51095/80324/54516/28973/51258/79072/118487/63931/51067/79675/84545/6183/3396/51250/708/84769/64216/92170/60493/64960/80222/8846/51081/115416/10922/80298/57129/7284/78988/7978/81554/285367/51021/130916/64951/54460/51069/54948/51654/84300/51116/57505/4528/54802/55157/87178/219402/85476/51373/60528/4701/51106/51204/283459/51335/5562
GO:0140115	export across plasma membrane	44	-0.350799	-239344237625982	0.000231278	0.004677	0.00365369	4816	tags=64%, list=33%, signal=43%	490/10057/6582/8671/7531/159371/808/3784/55244/3757/6584/801/376497/146802/6546/476/4363/1739/481/10257/3752/1244/30061/19/540/196527/5174/30819
GO:0150104	transport across blood-brain barrier	70	-0.268974	-218378104996887	0.00148459	0.0178568	0.0139498	4671	tags=53%, list=32%, signal=36%	20/10057/6582/4037/8671/9153/92745/2030/6584/3953/23428/6573/376497/6513/6526/10060/6581/11309/4363/4036/3643/6523/10257/114134/10396/9498/1244/23446/4035/6536/493/6541/8714/6533/10991/6505/9368
GO:0150116	regulation of cell-substrate junction organization	59	-0.259897	-195995047642886	0.00305944	0.0297348	0.0232289	4890	tags=54%, list=33%, signal=36%	5781/9448/6093/71/1307/23603/387/57669/6281/10979/5295/25/56940/22998/5728/23122/79834/23499/90102/2039/5786/54828/5795/5747/9922/10982/23332/6714/4035/3987/51057/4088
GO:1901137	carbohydrate derivative biosynthetic process	491	-0.181812	-266221358361055	1.18668e+06	1.56058e+08	1.21913e+08	5582	tags=52%, list=38%, signal=33%	79586/91319/29929/6901/5631/10005/64841/50484/7841/27090/11227/66008/9200/58505/4122/509/56913/518/26574/10347/5373/51703/80235/596/51465/23305/27230/6483/3600/2181/9469/6675/4351/6240/11041/51005/3251/5372/4881/2984/20/10057/9514/122622/79644/5159/51172/142/1738/286148/256281/113/147991/159/56886/84892/4860/29940/2524/3000/80055/143888/8833/100/47/55312/84002/23509/55022/64579/4790/84061/2137/79…
GO:1901568	fatty acid derivative metabolic process	54	-0.342421	-251669026648387	0.000140096	0.00314595	0.00245763	6551	tags=78%, list=45%, signal=43%	10998/390916/8694/240/158833/2678/9200/5019/51703/23305/2181/254552/66002/3295/247/79611/8529/3248/22949/9524/64064/123876/6576/283927/4051/201562/51144/2182/11332/55711/5066/79993/65985/31/2180/38/79071/197322/60481/84649/128486/3158
GO:1901570	fatty acid derivative biosynthetic process	34	-0.318908	-19199910862506	0.00608747	0.0468248	0.0365797	6346	tags=71%, list=43%, signal=40%	240/158833/2678/9200/51703/23305/2181/247/79611/9524/6576/201562/51144/2182/55711/5066/79993/65985/31/2180/79071/197322/60481/3158
GO:1901615	organic hydroxy compound metabolic process	408	-0.253479	-354861595867081	0.0540887	18.8263	14.7071	5131	tags=55%, list=35%, signal=37%	3684/4061/2672/114879/9562/9249/6569/147015/6720/7274/9965/27122/81537/3251/284161/66002/2820/4881/1050/51478/2055/80270/20/84105/337/79644/1581/1733/7108/1813/64801/23262/247/3418/8574/253430/23600/650/128/10654/22937/1576/114883/6713/6817/8431/653308/2224/1571/1594/47/3991/3029/8529/5978/27124/4790/4598/2222/8608/157506/29968/4952/55163/1610/4204/51360/3157/538/22949/3689/3249/9693/5321/9517/74…
GO:1901616	organic hydroxy compound catabolic process	57	-0.385746	-289697770636442	8.28167e+07	4.90645e+09	3.83294e+09	4771	tags=67%, list=33%, signal=45%	66002/2820/79644/1581/1576/6817/1594/8529/27124/4952/3613/2184/256356/54928/1312/8644/10380/5728/4051/3633/8898/2710/26007/3632/4128/8821/27284/4129/949/221/6783/11165/6718/6652/217/8871/1593/6822
GO:1901655	cellular response to ketone	73	-0.250577	-204512547609489	0.00187119	0.0210182	0.0164195	3055	tags=40%, list=21%, signal=32%	56848/23367/8644/64083/5105/5106/109/9131/2308/1080/2309/2908/2230/445/64754/7292/1956/65985/6714/31/1244/107/111/28960/2782/2621/1646/383/5581
GO:1901699	cellular response to nitrogen compound	492	-0.183757	-26924597134363	1.22974e+06	1.56058e+08	1.21913e+08	6653	tags=59%, list=45%, signal=33%	9475/6507/5031/8787/10999/1979/5296/84861/5829/6776/2729/54741/5447/2697/26060/6781/26/57657/5156/3184/4644/840/1288/80315/9663/7098/7471/6667/51617/324/51738/112/4641/7430/3484/54464/5138/57026/79041/57085/340706/10135/837/5166/2642/1663/2775/2875/51043/5290/6261/2946/116372/10603/1291/54795/5064/5888/8767/1131/1385/4061/4218/58533/51762/9177/1051/688/1800/6569/6720/7184/23371/5781/55667/1020/17…
GO:1901798	positive regulation of signal transduction by p53 class mediator	23	0.42848	226207566043896	0.00124587	0.01588	0.0124055	4944	tags=70%, list=34%, signal=46%	1655/10614/5366/1984/80279/545/6154/6167/3090/9521/6201/7314/27063/161742/6209/6224
GO:1901888	regulation of cell junction assembly	135	-0.226857	-2350169780504	0.000154641	0.00340394	0.00265918	4544	tags=49%, list=31%, signal=34%	6093/387804/71/57463/1307/5789/55209/64084/4867/79414/23603/5802/50848/387/57669/6281/10979/10611/4208/1636/3551/9693/25/10082/5818/5566/149461/5906/3556/5583/56940/22998/5728/23122/375790/9746/8292/79834/23499/64284/90102/2039/5786/10160/29904/54828/5795/5747/2889/10507/23332/7097/6714/55607/9231/26047/2048/4035/3987/261734/22883/59272/51057/351/183/4088
GO:1902042	negative regulation of extrinsic apoptotic signaling pathway via death domain receptors	24	0.478045	25801270255682	0.000161146	0.0034989	0.00273335	4431	tags=71%, list=30%, signal=50%	80196/3383/2244/8682/5054/9181/2243/7128/85450/2876/11315/1654/2266/598/64114/407006/55179
GO:1902306	negative regulation of sodium ion transmembrane transport	12	-0.669267	-260995064641022	1.3935e+09	0.000558304	0.000436149	1468	tags=67%, list=10%, signal=60%	817/23327/150684/27347/255738/4734/9368/5581
GO:1903405	protein localization to nuclear body	12	0.68672	266261130993996	1.36835e+09	0.000552199	0.00043138	2328	tags=83%, list=16%, signal=70%	55135/908/6950/10694/56257/22948/10576/10574/7203/1736
GO:1903649	regulation of cytoplasmic transport	23	-0.468999	-239275693663089	0.000307697	0.00573099	0.00447708	5088	tags=78%, list=35%, signal=51%	27236/5605/7874/5962/5594/5595/5604/51652/404636/8724/5071/8898/10079/6653/7260/6714/29934/8934
GO:1903707	negative regulation of hemopoiesis	69	0.256488	2137973537861	0.00230334	0.0242024	0.018907	4352	tags=51%, list=30%, signal=36%	4830/3313/10401/3659/634/6469/80149/9935/54542/84524/4192/10766/441478/865/10221/301/972/3135/3146/4609/55365/652/56834/28959/3566/2624/4831/3623/8651/7099/3902/407006/171392/50943/84695
GO:1904029	regulation of cyclin-dependent protein kinase activity	90	0.22909	20882638607495	0.00123603	0.015876	0.0124024	2423	tags=34%, list=17%, signal=29%	1647/1030/595/9134/836/904/28984/23560/56647/29950/1164/8812/54619/10614/8851/11140/57018/1032/3326/1026/2810/5629/7128/5716/905/898/80279/4221/990/388324/1027
GO:1904262	negative regulation of TORC1 signaling	15	-0.461409	-196225783224989	0.00643931	0.0481169	0.0375891	4611	tags=73%, list=31%, signal=50%	83667/55846/27244/729438/220441/472/154743/64798/143686/352954/9681
GO:1904816	positive regulation of protein localization to chromosome, telomeric region	12	0.769537	298371946311022	3.00476e+07	1.99208e+09	1.55622e+09	2328	tags=92%, list=16%, signal=77%	55135/908/6950/10694/26354/22948/10576/54552/10574/7203/1736
GO:1904867	protein localization to Cajal body	12	0.68672	266261130993996	1.36835e+09	0.000552199	0.00043138	2328	tags=83%, list=16%, signal=70%	55135/908/6950/10694/56257/22948/10576/10574/7203/1736
GO:1904869	regulation of protein localization to Cajal body	11	0.672341	249495884784244	3.69463e+09	0.00113676	0.000888043	2328	tags=82%, list=16%, signal=69%	908/6950/10694/56257/22948/10576/10574/7203/1736
GO:1904871	positive regulation of protein localization to Cajal body	11	0.672341	249495884784244	3.69463e+09	0.00113676	0.000888043	2328	tags=82%, list=16%, signal=69%	908/6950/10694/56257/22948/10576/10574/7203/1736
GO:1904896	ESCRT complex disassembly	10	0.582041	207208182560754	0.00214662	0.0228847	0.0178776	5610	tags=90%, list=38%, signal=56%	91782/51510/57132/27243/25978/27183/9525/5119/9798
GO:1904903	ESCRT III complex disassembly	10	0.582041	207208182560754	0.00214662	0.0228847	0.0178776	5610	tags=90%, list=38%, signal=56%	91782/51510/57132/27243/25978/27183/9525/5119/9798
GO:1905952	regulation of lipid localization	122	-0.190529	-188099060131526	0.00595454	0.0461207	0.0360297	4671	tags=46%, list=32%, signal=32%	20/337/55754/8660/64801/10062/208/3690/55252/8529/29923/4790/5025/171023/10226/80820/5321/4602/9227/718/345/2058/10162/1582/5467/5465/114882/114880/5771/5071/6342/5727/6721/22925/339221/6256/32/10396/4481/21/949/1622/5608/2180/160518/19/4035/338/8398/255738/23461/128486/183/158219/1950/5468
GO:1990253	cellular response to leucine starvation	10	-0.544579	-194765887323051	0.00426229	0.0364143	0.028447	4611	tags=80%, list=31%, signal=55%	83667/10325/27244/51520/440275/58528/143686/2475
GO:1990778	protein localization to cell periphery	282	-0.17087	-21711966205012	0.000138835	0.00314299	0.00245531	5946	tags=59%, list=41%, signal=36%	2533/25999/126353/9475/10938/286/6810/92482/55704/57154/26060/79156/4644/51201/9135/3911/302/7132/10434/200894/7430/254887/80852/27237/246329/23513/8673/11187/8301/245812/7429/9495/89958/57731/3675/92359/10490/5064/3767/8500/4218/51762/2181/9351/55667/1020/285172/2633/84455/5962/10399/20/160622/26003/84687/6093/7871/2905/8766/163882/27032/55204/4905/81619/5864/208/51304/2013/50848/25945/583/6281/…
GO:2000114	regulation of establishment of cell polarity	21	-0.401527	-200750790497873	0.00434671	0.0367326	0.0286957	4724	tags=67%, list=32%, signal=45%	10399/6093/2319/51571/2934/9585/57698/2185/54828/81704/10565/22902/23189/51057
GO:2001020	regulation of response to DNA damage stimulus	206	0.150056	179109666483913	0.00515935	0.0415809	0.0324832	4733	tags=42%, list=32%, signal=29%	51499/55719/4824/55135/7335/54386/7157/56893/2067/5111/10269/57805/24144/80311/51616/7919/23411/5514/1655/7014/8870/6615/2521/57103/5366/23049/5429/1025/6498/55159/7454/9774/2072/1032/51548/51547/54465/165918/10155/8313/5716/9513/1407/1191/972/3146/545/6118/55611/11284/3014/4609/78996/220042/29086/57332/10039/6880/5531/6154/5893/51149/64844/3090/6419/1660/598/9521/63979/7398/83933/7334/26271/4070…
GO:2001242	regulation of intrinsic apoptotic signaling pathway	145	0.200535	215133746083729	0.00063521	0.0100497	0.00785084	5842	tags=55%, list=40%, signal=34%	51499/8531/4824/27035/7157/3301/26155/57805/8678/51616/23411/6615/5366/5329/84447/10525/9181/6498/1984/9774/1032/6421/10488/138065/10059/9529/29979/10018/2876/5414/1191/972/11315/6280/5598/7417/7009/581/4722/3065/220042/90993/6880/1654/8996/4780/8876/27429/6154/10955/5743/10134/64844/598/3315/63979/6647/6201/2907/7314/10105/1649/6477/1687/3190/51060/3091/9479/55829/599/960/51079/51588/114971/5770…

## Sheet: AFB1+BEN
ID	Description	setSize	enrichmentScore	NES	pvalue	p.adjust	qvalues	rank	leading_edge	core_enrichment
GO:0000070	mitotic sister chromatid segregation	157	-0.218827	-183361923827863	0.00141785	0.0269488	0.0230085	4982	tags=46%, list=34%, signal=31%	10726/283489/23397/9212/9928/4751/7175/8881/64151/9055/146909/55143/57520/990/81930/11004/7273/7272/83540/9493/23126/8697/56984/27175/83903/55795/1063/7517/51434/348654/10460/27183/54921/1062/29781/7756/3192/9319/256364/79980/80218/29945/891/9232/9985/3835/5885/27243/3837/113130/79998/8260/55719/11065/10270/148479/5901/26993/991/8678/3550/91782/6795/54908/79003/55781/9587/29082/51433/5347/51510/5…
GO:0000079	regulation of cyclin-dependent protein serine/threonine kinase activity	86	-0.254233	-184170138128284	0.00226759	0.0385996	0.0329558	3707	tags=43%, list=25%, signal=32%	6868/1028/5716/1163/2965/901/9113/5311/891/4221/2810/51191/905/11140/9134/54619/28984/388324/1026/5629/7128/56647/57018/80279/1032/23560/8851/904/29950/1027/5347/1647/8812/836/10614/1164/1030
GO:0000184	nuclear-transcribed mRNA catabolic process, nonsense-mediated decay	37	-0.374911	-207930996159129	0.00129113	0.0253409	0.0216358	4042	tags=59%, list=28%, signal=43%	79048/65110/5394/4116/4686/23381/2107/55802/22794/167227/154197/6499/65109/23049/9775/10921/22916/9939/55629/85441/55181/9704
GO:0000244	spliceosomal tri-snRNP complex assembly	13	-0.549056	-201600225735044	0.00310405	0.0472308	0.040325	3600	tags=69%, list=25%, signal=52%	7375/26121/10594/9733/10421/26835/25980/10772/9129
GO:0001508	action potential	85	0.276376	189761097725152	0.00122405	0.0244327	0.0208603	5437	tags=56%, list=37%, signal=36%	817/776/23327/287/288/8514/79784/274/10142/476/1756/23171/2767/6640/1739/30819/6334/801/481/2776/6717/6331/1134/7341/3745/3757/7531/149461/54795/5774/5318/7871/2859/783/9722/2258/1180/1137/3760/5025/808/784/1525/10008/3728/29098/1824/3752
GO:0002181	cytoplasmic translation	143	-0.39232	-321999143712223	18.001	7711.34	6583.84	5290	tags=65%, list=36%, signal=42%	6137/25873/51389/6154/6191/7458/80315/6141/8662/8894/3921/6208/6125/6165/6193/6194/6134/6128/6201/6209/54505/6234/6205/6157/6175/11224/6176/6181/6223/6129/6217/8663/6232/6228/2107/6169/6160/6224/6142/24140/221662/6227/1981/6218/6189/1973/6235/6168/1939/8669/285381/6206/4736/6138/6170/6222/6210/51121/6171/6143/6229/6161/2332/9045/6144/1974/6173/6152/23521/6167/6147/6155/79727/6133/6204/6156/6124/8…
GO:0002433	immune response-regulating cell surface receptor signaling pathway involved in phagocytosis	20	0.528864	229467508354682	0.000286979	0.00854645	0.00729684	2215	tags=65%, list=15%, signal=55%	7410/5795/5747/6714/5058/4067/2534/55198/10451/25/7525/26060/5906
GO:0002544	chronic inflammatory response	11	-0.604346	-207953270012453	0.00217372	0.0377116	0.0321977	3981	tags=82%, list=27%, signal=60%	50943/8876/6280/201294/7128/7124/9536/4049/7057
GO:0003013	circulatory system process	387	0.220432	208486552642912	7.54923e+07	5.32173e+09	4.54362e+09	5483	tags=50%, list=37%, signal=32%	817/10396/23576/3643/776/23327/7068/5795/6523/1889/6532/56998/23446/5125/287/9446/10257/143872/6505/18/1373/6518/1244/6714/5608/1573/4041/5139/7067/659/5910/2909/10991/274/6513/23428/7442/10142/4634/4035/2131/2132/476/11309/1756/9368/290/23171/2621/11214/5468/7026/114134/1956/6640/7134/2534/1739/30819/801/481/27347/55151/27134/5465/59272/6533/4012/55450/9474/2030/340481/4088/157378/5345/2643/6717…
GO:0003382	epithelial cell morphogenesis	30	0.416105	209310726019388	0.000995051	0.0209903	0.0179212	6302	tags=73%, list=43%, signal=42%	23094/2317/57111/57669/79977/6768/64919/196383/3549/26084/353116/1365/3209/2195/64102/4233/440193/79983/25932/57493/6781/10653
GO:0005975	carbohydrate metabolic process	480	0.246765	242382841398903	519.397	14462.6	123480	5551	tags=54%, list=38%, signal=34%	80168/55512/5165/5236/130589/8908/57733/3643/9942/64080/10580/3632/2530/3705/3417/9446/32/4121/2585/5257/2203/84750/6518/5210/6714/6514/3340/4126/9653/2683/2632/2591/23038/5163/4041/3667/10402/338596/10499/51071/55915/23516/140710/6652/2821/2932/957/1374/57462/84649/10165/85414/2710/6513/4124/93010/3795/5214/2131/2132/3706/57486/5213/221937/3939/5313/2023/124872/5836/57001/145173/4967/23171/80146…
GO:0006066	alcohol metabolic process	281	0.339767	299948736112364	0.00811723	11.3012	9.64883	5058	tags=58%, list=34%, signal=39%	27284/6256/80168/847/3632/3705/3417/1119/5860/2053/55825/6718/949/8435/51474/55902/221/1593/5092/9971/8029/3638/1717/4041/84532/50814/255738/56624/114876/4047/55304/6652/158219/25987/1080/8611/6783/84649/338/2710/6713/6721/1718/6822/19/23461/10682/2330/3706/6307/8613/4598/11165/3158/8821/2222/8431/10380/5106/51141/6817/2230/217/3613/3157/216/157506/10327/3422/2819/47/219/8898/64801/1646/5745/3419…
GO:0006081	cellular aldehyde metabolic process	50	0.37269	224024265448618	0.000250637	0.00784155	0.00669501	4462	tags=60%, list=30%, signal=42%	3417/221/501/25953/8566/2098/7086/216/157506/10327/128/132158/1645/6121/112817/64902/147015/3418/55163/3029/8574/127/9380/223/8644/5978/57026/1181/224/6888
GO:0006091	generation of precursor metabolites and energy	417	0.173256	166049785520094	0.000594174	0.0144648	0.0123498	5998	tags=50%, list=41%, signal=30%	2731/79085/5236/8908/3643/8801/9942/64080/847/10580/3417/5860/246269/4129/48/5257/55902/65985/23530/2203/2632/10954/54677/3667/84532/10495/664/51071/2821/1528/2932/957/10165/8802/3795/5214/38/205/5213/221937/3939/5313/2023/5836/55847/4967/3158/5663/23729/1352/5230/55753/7086/5256/4724/2230/217/5226/229/863/10327/2819/3651/55526/2538/5465/9611/498/2673/3419/8974/51422/2936/3607/538/1353/221264/229…
GO:0006099	tricarboxylic acid cycle	28	0.409558	201489893006065	0.00265969	0.0433094	0.036977	4071	tags=57%, list=28%, signal=41%	8801/3417/48/23530/8802/4967/55753/55526/3419/50/4190/8803/3418/1431/6390/2271
GO:0006323	DNA packaging	127	-0.282826	-22844097977805	9.08421e+08	0.00049598	0.000423461	2760	tags=38%, list=19%, signal=31%	3148/3007/8347/891/85236/128312/83743/9733/113130/121504/8260/3020/8356/23378/6418/3014/3146/10270/26155/8344/3006/8341/144108/148479/29855/23270/26993/440689/8349/54623/7259/7157/23234/8362/6046/8364/256329/23411/8357/8367/5347/22985/8345/3017/8365/8353/8339/64061
GO:0006333	chromatin assembly or disassembly	117	-0.27353	-215378130960824	8.54949e+09	0.0031119	0.0026569	3047	tags=40%, list=21%, signal=32%	3021/11176/3159/3148/3007/8347/85236/128312/83743/9733/121504/3020/8356/23378/6418/3014/3146/26155/8344/3006/8341/144108/29855/23270/440689/8349/54623/7259/7157/23234/8362/11198/6046/6603/8364/256329/23411/8357/9219/8367/8345/8479/3017/8365/8353/8339/64061
GO:0006360	transcription by RNA polymerase I	52	-0.336726	-206173430263316	0.000743959	0.0168488	0.0143853	3492	tags=48%, list=24%, signal=37%	468/2965/10269/11176/5441/10849/56919/9191/4141/7343/55646/2316/51547/64425/30834/284119/9533/9015/84128/2071/84135/9013/387496/5440/54700
GO:0006403	RNA localization	183	-0.231194	-202618107456059	7.61909e+09	0.00286694	0.00244776	5180	tags=50%, list=35%, signal=33%	23180/10574/84248/9883/7203/84271/10642/5976/9984/9326/10856/7175/545/1070/9972/10211/3087/55308/6741/55011/10576/92345/143244/3800/56648/65110/8888/5394/4116/29890/25909/4686/55795/23279/54830/10189/7884/11052/908/23381/5903/79902/3192/22794/167227/55916/4927/8086/84324/8570/7538/51092/2332/65109/23049/1984/51602/53371/5433/10212/7514/9775/8480/26097/54888/677/55421/6426/5901/26993/55505/65083/2…
GO:0006470	protein dephosphorylation	232	0.195513	168624144732061	0.00133958	0.0259033	0.0221159	6136	tags=52%, list=42%, signal=31%	5786/57460/5796/5795/23239/55313/5523/4249/121665/5792/27068/10076/5780/3064/3958/8556/51657/5801/9258/10217/2932/818/23261/8945/57546/9110/5530/142679/5525/8555/5528/5527/132160/4690/1739/801/5529/85464/8898/23291/4534/8897/57552/5495/55291/9104/5775/54434/5771/55844/57181/84687/3551/90673/7803/3717/5533/9562/5728/5494/55197/51496/2475/9150/7531/64419/57223/5774/9701/2771/5478/5534/57026/5501/52…
GO:0006486	protein glycosylation	185	0.248257	203184372441934	4.66689e+09	0.00186978	0.00159639	5445	tags=54%, list=37%, signal=34%	2590/2530/4249/11320/2650/4121/84750/2683/2591/200424/84899/91949/10402/338596/11226/957/80312/6480/2589/123264/2651/4124/93010/4248/63917/2131/2132/124872/145173/5663/10317/2524/282679/10565/79796/256435/55568/22906/2673/9245/9215/79695/199857/29071/51465/10905/57134/7423/4351/23509/2137/201595/8869/256281/84002/5238/11041/9334/56913/79087/57171/84061/84197/8702/84752/5373/286148/84892/4247/6184…
GO:0006575	cellular modified amino acid metabolic process	148	0.282269	220889985850775	5.63547e+07	0.000323545	0.000276239	4356	tags=49%, list=30%, signal=35%	27284/117247/445/6470/2948/3417/9446/154141/6505/501/54677/2938/55217/26090/1152/1428/2628/1374/7298/10550/6822/2939/389434/9791/55349/8424/4522/23474/114882/1384/114884/200895/10162/1733/2936/10588/2941/4258/9027/2643/3249/113235/6573/112817/34/51449/191/10840/10400/1719/2593/3029/1757/25974/6535/2954/223/5359/1497/471/23659/2806/2944/5447/254531/7038/2879/53405/6583/548596/256987/84879
GO:0006644	phospholipid metabolic process	325	0.265504	243101458652053	46708.2	86706	7.40284e+06	4356	tags=47%, list=30%, signal=34%	56894/55512/51205/1040/5337/8395/3632/23446/1622/3417/1119/154141/27315/949/57217/55697/56994/5297/9971/128869/253558/57605/259230/255738/5291/9488/93183/26090/21/9588/8611/204962/9110/3706/8613/9791/4598/26751/3992/80736/3158/128486/2627/8821/2222/55361/10380/8760/84947/23556/3613/22979/3157/84302/3422/22876/55151/8898/114882/54947/9896/81579/84668/114884/55300/126969/23175/4534/10162/27124/8897…
GO:0006694	steroid biosynthetic process	137	0.311536	239526322807636	7.66485e+07	5.33569e+09	4.55554e+09	5220	tags=57%, list=36%, signal=37%	11001/6718/949/5618/1593/9971/26031/3638/1717/50814/10826/114876/4047/1080/338/51170/6713/1718/5087/10682/6307/476/11161/4598/3158/2222/3283/51141/2230/6342/3157/3422/340895/47/3294/64801/10162/51422/79154/9885/3930/51478/51144/29881/8720/114883/10654/9563/1727/9965/1582/51360/23600/80270/8644/5825/3291/2224/1594/5447/5978/337/22937/2264/7108/1181/93517/7923/4790/10613/1609/1586/79644/4597/427/67…
GO:0006734	NADH metabolic process	24	0.45099	211361778252801	0.0019369	0.0342432	0.0292364	3330	tags=58%, list=23%, signal=45%	5214/5213/221937/2023/4967/5106/229/2819/3607/4190/2820/25961/8604/5211
GO:0006767	water-soluble vitamin metabolic process	52	0.34279	208563381937852	0.000724978	0.0166148	0.0141855	2748	tags=46%, list=19%, signal=38%	326625/6470/9446/80704/56922/6513/55788/8566/9962/9963/10327/200895/10588/113278/9104/686/113235/6573/55312/1719/166785/55163/25974/4548
GO:0006790	sulfur compound metabolic process	278	0.2678	235550742087846	764235	9.45784e+07	8.07497e+07	6083	tags=60%, list=41%, signal=36%	27284/5165/8801/55711/2948/3417/9446/6819/8459/79993/32/80704/6505/55902/1373/8460/80221/1244/8942/3340/56922/26035/9061/23382/5163/22/84532/10402/2938/9060/4507/25874/6777/6783/84649/10550/31/93010/197322/6822/2939/38/2131/7498/2132/1836/6821/4598/4967/3158/9469/128486/4143/79625/4522/60481/166012/3295/10380/79071/6817/11046/201562/23474/3157/10327/47/64132/11332/58472/1312/2936/6576/2181/2941/9…
GO:0006816	calcium ion transport	251	0.200566	174791855475879	0.00096628	0.020539	0.0175359	5070	tags=46%, list=35%, signal=31%	8573/817/57158/79085/10367/776/6786/287/9446/196527/7421/57685/90550/7225/3064/3958/57113/4638/140803/2035/23413/818/274/7442/5530/8416/1756/140738/401152/2621/159371/5663/1230/4067/2534/27112/801/481/55151/27075/54836/4976/91404/5170/41/57620/7466/9474/8065/9512/25/63933/9104/6717/26133/302/162514/1020/493/79041/5566/2147/309/84876/2631/10939/2905/9254/80228/56848/221154/3710/409/387/183/29763/5…
GO:0006869	lipid transport	294	0.251976	224696394035843	7.16599e+06	6.18123e+08	5.27745e+07	4433	tags=46%, list=30%, signal=32%	6256/10396/10079/11001/57476/2169/4481/55852/23250/1622/9066/1119/10257/949/8435/51474/196527/160518/1244/26031/5608/54677/57605/255738/114876/6555/22925/158219/21/25987/1374/1080/338/123264/6721/153768/6513/19/23461/4035/5205/11309/4547/23200/6579/5468/389668/8431/84947/51228/51054/6342/10809/114882/64801/81579/5465/286410/114884/10162/2168/339221/9885/2181/2182/3069/29881/23120/1645/302/23762/2…
GO:0006873	cellular ion homeostasis	412	0.193031	184488961917233	5.35289e+08	0.00209931	0.00179237	5335	tags=47%, list=36%, signal=31%	817/57158/79085/4891/10367/6786/51196/23327/1356/287/9446/121665/30061/48/57217/6505/2782/1244/540/7421/90550/22/84899/7225/9777/5910/1902/3064/664/1811/23516/57113/1152/1080/23413/10686/7442/4035/55532/476/1756/8546/261729/9368/164656/159371/5663/282679/55647/1230/4067/2534/27112/801/481/10989/55151/1657/6549/5745/28982/5170/155066/144811/57620/27020/7466/9474/10590/4088/9843/5595/5594/51606/921…
GO:0006959	humoral immune response	105	-0.260422	-198941805370824	0.000609208	0.0146236	0.0124855	4214	tags=50%, list=29%, signal=36%	648/1236/2920/727/3273/975/55012/5245/6347/2243/683/6223/4851/2/124976/3569/8347/240/10148/6280/26525/3263/85236/710/5452/6170/1191/116842/2625/5450/10406/733/6590/140686/4153/5199/2244/28984/6156/8344/3442/3105/8349/715/7124/3151/4049/3133/4069/8339/7030/1604/966
GO:0006977	DNA damage response, signal transduction by p53 class mediator resulting in cell cycle arrest	17	-0.481108	-200605599744292	0.00313521	0.0475378	0.0405871	2169	tags=47%, list=15%, signal=40%	51499/835/1263/1026/55367/7157/10769/1027
GO:0007015	actin filament organization	353	0.212825	197961034278048	9.69461e+08	0.000524168	0.000447528	5277	tags=49%, list=36%, signal=32%	4645/51466/23242/55604/4642/3693/10580/199/8440/51474/359845/348110/6714/93663/3936/2039/4643/90550/133522/23332/357/5058/8470/1902/5217/2241/9124/2909/118/832/9788/87/408/274/5357/57580/57482/55160/120/7456/6712/1495/55930/4640/57619/23189/100533183/4646/22902/9050/10565/85477/4648/4690/84952/1739/10787/23191/7481/85464/23221/54857/800/23370/4771/283/10083/116985/4088/9873/4430/9645/5345/25/7982…
GO:0007140	male meiotic nuclear division	25	-0.453	-218769178862398	0.000909378	0.0194782	0.0166302	4154	tags=64%, list=28%, signal=46%	81930/29988/55810/400629/11022/11077/4292/7589/9319/56603/27030/9985/4603/3306/675/56155
GO:0007169	transmembrane receptor protein tyrosine kinase signaling pathway	458	0.188857	183649593697343	1.59873e+09	0.000802104	0.000684825	5767	tags=49%, list=39%, signal=31%	26037/55512/5786/7410/3643/51196/252983/5795/89853/10580/2155/5590/613/9847/5747/56034/8440/4015/3482/5618/868/6653/8874/896/6714/3340/10461/2591/4643/6272/3667/5058/5291/1176/9019/2241/23516/140710/5801/9788/57732/131405/6777/2932/2065/57462/8997/4734/6599/4035/2131/7498/55532/2889/9368/22853/2064/6503/55614/23189/5663/1956/2549/23294/2308/8879/23554/7867/4690/4067/2534/153090/23191/114882/4976/…
GO:0007292	female gamete generation	98	-0.267957	-200928414733661	0.000571454	0.0140815	0.0120226	3670	tags=43%, list=25%, signal=32%	5764/22932/64848/8085/268/51087/29781/83943/11077/4292/9665/9319/340719/94027/4882/891/3074/84515/27030/259266/3625/9985/2069/4192/5743/4438/5573/79670/675/10766/8549/6795/100125288/23411/994/56339/91603/91746/5347/2067/2661/8061
GO:0007586	digestion	78	0.2899	194854507838007	0.00120546	0.0242354	0.0206918	2894	tags=41%, list=20%, signal=33%	80168/2169/6523/6718/949/48/8435/51474/6518/64081/7421/56624/2035/5357/7442/57482/27347/1646/10162/2168/339221/9245/29881/1645/113235/79924/7429/6584/6476/1582/50848/7032
GO:0008206	bile acid metabolic process	39	0.365435	198142745567268	0.00161739	0.0298253	0.0254645	3063	tags=51%, list=21%, signal=41%	11001/6718/1593/9971/26031/114876/6822/5205/6342/340895/64801/2494/9885/1645/114883/9965/1582/23600/80270/5825
GO:0008217	regulation of blood pressure	111	0.307057	226760776104499	4.06817e+08	0.00169072	0.00144351	4621	tags=52%, list=31%, signal=36%	23576/1889/5125/143872/18/6518/4041/659/7442/2131/2132/476/290/2621/5468/7026/27347/5465/59272/4012/55450/4088/5345/2643/128/1908/64167/51752/79924/4204/2784/50848/6648/91608/27131/3162/5331/3291/387/1636/65125/3816/183/4881/29953/522/1910/55328/57085/490/10266/5025/27035/5155/10135/9424/7137/6296
GO:0008380	RNA splicing	372	-0.275468	-272708431518243	0.790158	4400.39	3756.99	3999	tags=44%, list=27%, signal=33%	10084/5515/9410/3190/10659/11129/27257/64121/11338/10250/8175/4116/55660/29890/79171/55599/4686/7375/7536/9406/284695/154007/55147/81576/26121/10189/9092/105378616/51202/23451/55094/51340/54957/6628/9130/3192/55234/11171/22794/9589/10450/8220/6625/221662/84844/58506/57716/8570/23091/23524/84872/55119/59286/10286/9513/51645/8996/56949/113146/55280/23020/6429/10594/9733/55696/23658/57396/10181/2332…
GO:0008643	carbohydrate transport	119	0.299025	224604632031643	1.28777e+08	0.000683011	0.000583146	5141	tags=56%, list=35%, signal=37%	55512/200010/115584/3643/155184/252983/6523/26503/56606/10580/9847/6518/91749/6514/55314/57761/89872/6272/3667/144195/85414/6513/5357/57210/282679/9962/9963/11046/55198/114882/54020/51422/23169/1432/23443/7525/26060/5906/5295/7429/84255/5467/673/9965/23433/55032/4205/23596/7430/6524/5167/148808/1389/10999/208/100506658/84879/91869/8218/10559/6927/5781/5584/79602/8660/6526/55022
GO:0009308	amine metabolic process	79	0.300366	20241236869837	0.00028217	0.00849409	0.00725213	4266	tags=52%, list=29%, signal=37%	27284/4128/9056/23446/5053/1119/6819/4129/6505/18/1644/1244/8942/9971/501/25953/55349/6817/3176/1312/284161/538/2643/6581/493/4204/27163/222236/79814/1610/51573/6611/4881/3251/113451/10295/26/112483/196743/4946/23498
GO:0009410	response to xenobiotic stimulus	345	0.176631	163254788300525	0.000811679	0.0177264	0.0151346	4010	tags=37%, list=27%, signal=28%	27284/3033/8648/1600/4773/445/847/6532/2948/9446/5860/10257/4015/5066/4129/32/18/65985/1644/1373/134147/2203/1244/6714/5608/1573/5139/2938/6652/21/8091/339/1374/7298/6928/5925/408/1557/2016/6822/19/2939/205/2330/476/3939/5141/210/113612/873/383/2621/2627/7079/10758/1956/4646/122622/6817/143/4968/4067/3157/2534/3651/10451/999/3172/1312/3030/9474/57552/7976/8412/2326/2941/5378/9027/368/1645/2329/59…
GO:0009636	response to toxic substance	189	0.215933	177582055402632	0.00161666	0.0298253	0.0254645	4156	tags=41%, list=28%, signal=30%	7097/445/4155/847/6532/1119/9446/5174/2053/10516/4129/4259/23530/1644/1373/1244/540/54996/64757/89872/84293/2745/2938/9588/140803/7298/23428/2176/55532/210/127281/383/241/2098/9963/9131/4067/216/10327/999/2168/2936/5595/5594/538/4258/2643/128/9076/23028/4257/51780/1719/79813/6584/4255/2954/127/6648/10919/7001/2984/4357/9429/670/7296/2944/10715/10249/10935/55607/7779/337/2879/6382/213/983
GO:0010565	regulation of cellular ketone metabolic process	97	0.276908	197491924553969	0.000622771	0.014885	0.0127086	5641	tags=59%, list=38%, signal=36%	5165/9056/83752/32/9971/3638/23038/57761/5163/3667/1374/84649/85414/5468/60481/51141/157506/55198/340895/5465/9611/1312/2168/51422/9926/9104/493/9563/5467/51085/9965/9612/8644/5164/2475/10295/10062/5978/337/22937/2264/1181/208/84879/10613/1609/219743/8660/345/160760/6720/134429/23408/10464/205251/6662/207
GO:0010661	positive regulation of muscle cell apoptotic process	21	0.492209	218511197259938	0.000815484	0.01774	0.0151461	3731	tags=62%, list=25%, signal=46%	817/664/408/5468/4217/6416/4058/6648/5728/183/27250/1871/6789
GO:0010817	regulation of hormone levels	357	0.184141	171540959657803	0.000256177	0.00792585	0.00676698	4969	tags=44%, list=34%, signal=30%	27284/7447/55512/3033/117247/252983/1889/5125/6934/9066/6718/949/353500/18/65985/54097/1244/9971/91942/5046/1717/90550/4041/3667/9727/23516/25874/1428/6777/1374/1080/406/6783/84649/51170/6928/818/23428/6822/4035/389434/476/5213/5530/3382/26056/133308/3283/9324/1956/3295/8431/5106/8879/6817/3169/2230/4067/216/157506/3651/51768/3294/1646/59272/3172/1733/1312/2746/55450/79154/6755/51478/2182/6453/51…
GO:0010876	lipid localization	335	0.241566	2233179750365	7.01899e+06	6.18123e+08	5.27745e+07	4433	tags=45%, list=30%, signal=32%	6256/10396/10079/11001/57476/2169/1040/4481/55852/23250/1622/9066/1119/10257/32/949/8435/51474/196527/160518/1244/26031/5608/54677/57605/255738/114876/6555/22925/60526/158219/21/6777/25987/1374/1080/84649/338/123264/6713/6721/153768/6513/19/23461/4035/5205/11309/128486/4547/23200/6579/5468/389668/8431/8760/4232/84947/51228/51054/6342/10809/114882/64801/81579/5465/286410/114884/10162/2168/339221/9…
GO:0010885	regulation of cholesterol storage	14	0.574341	217276785954785	0.00132832	0.025775	0.0220064	3618	tags=71%, list=25%, signal=54%	4481/949/158219/338/6721/19/5468/5465/5467/10062
GO:0015695	organic cation transport	30	0.391128	19674669664794	0.0028204	0.0450955	0.038502	6431	tags=77%, list=44%, signal=43%	23446/5174/80704/204962/23428/80736/5663/115286/126969/2030/6581/284439/6584/788/6583/6582/55244/5002/222962/10928/6580/85413/79572
GO:0015721	bile acid and bile salt transport	22	0.481717	218214591840601	0.000637395	0.0151153	0.0129053	3979	tags=64%, list=27%, signal=46%	10257/1244/6555/123264/5205/11309/6579/8431/1645/8714/200931/5825/84068/6554
GO:0016042	lipid catabolic process	252	0.282666	246625651277858	254196	3.53904e+07	3.02158e+07	5572	tags=57%, list=38%, signal=36%	39/55512/3033/57733/11001/51390/51196/5337/56898/3417/5051/83752/32/6718/949/5096/1593/1373/6653/5140/54677/3667/1666/7067/56624/60526/26090/9588/8309/1374/6783/338/51170/64784/6822/3988/38/4035/285848/158584/549/3295/80724/5106/8879/6342/747/22876/8310/81579/5465/1384/1962/23175/2168/339221/51171/284161/84696/3030/57406/57552/11145/11343/4258/123745/7879/27293/23007/283927/34/23236/27163/222236/…
GO:0016072	rRNA metabolic process	228	-0.326032	-296795399002516	62.8865	23347.7	19933.9	4180	tags=49%, list=28%, signal=35%	6201/55011/6209/55226/6234/25879/92345/79922/92342/91695/55178/84294/55299/5394/10438/90121/11224/6223/6129/6217/79050/10775/705/9092/54555/53918/6232/51202/83732/162989/81887/11103/6041/51154/90459/6227/6218/92797/84916/9875/51575/10436/79002/4736/260294/51367/84365/55646/23223/51504/23481/6229/9045/64216/29777/84549/51602/51547/65080/10360/6155/8780/56342/51077/79707/9775/51093/57602/23378/1140…
GO:0016125	sterol metabolic process	127	0.362578	274926114346075	187.76	2.75167e+07	2.34934e+07	2829	tags=48%, list=19%, signal=39%	6256/847/2053/6718/949/8435/51474/1593/9971/8029/3638/1717/4041/50814/255738/10826/114876/4047/158219/25987/1080/84649/338/6713/6721/1718/6822/19/23461/3988/10682/2330/6307/11161/4598/3158/2222/8431/51141/2230/3157/3422/47/64801/10162/51422/3930/51478/3069/29881/8720/6820/10654/84650/1050/2784/5467/1727/3990/1582/51360
GO:0016197	endosomal transport	213	0.266229	225396901204578	8.01727e+07	5.4538e+09	4.65638e+09	4774	tags=49%, list=33%, signal=33%	4645/10079/57706/163486/55353/8934/7813/6653/6272/9727/79958/51542/19/9372/8729/29934/8546/57533/22853/64284/400/58513/55610/84440/54520/22876/8724/10311/6453/123745/51429/128866/7879/29886/81609/143187/404636/51209/85021/84079/6643/57724/63893/22836/9230/4218/9905/5870/8723/23603/84162/51028/10043/84910/50618/8766/55207/253725/51652/27236/58533/27131/112936/112574/23274/7874/2060/8411/7840/84661…
GO:0016311	dephosphorylation	346	0.205674	190587049248311	2.51768e+09	0.00117823	0.00100596	5387	tags=47%, list=37%, signal=31%	5786/57460/51205/5796/5795/63928/23239/3632/55313/8226/64759/5523/2053/4249/121665/5792/27068/2203/5210/221294/6714/133522/10076/5780/3064/3958/8556/51657/5801/9258/10217/2932/8611/818/23261/8945/57546/9110/8613/145376/955/92370/476/5530/142679/64077/5723/5525/8821/255743/58497/10380/8555/5528/5527/132160/4690/3613/761/80824/1739/801/22876/5529/85464/8898/9896/2538/23291/23175/4534/27124/8897/887…
GO:0016358	dendrite development	184	0.20108	164221355893413	0.00307641	0.0471236	0.0402335	4389	tags=41%, list=30%, signal=29%	29904/26037/4891/1600/23242/23327/9922/6383/8440/51473/4038/7225/57549/23373/84062/2932/4734/23613/57580/3706/5530/10160/64284/5663/10611/22849/2534/153090/23191/22903/4976/22906/6792/4135/2182/6453/9856/85358/84079/8831/1020/10498/8609/4204/84687/9693/102/9762/7337/10006/6801/5728/387/9231/50807/8301/3251/2475/84816/382/4205/85442/23543/23043/473/4208/10152/66008/5062/55607/50488/7101/80725/8487…
GO:0018107	peptidyl-threonine phosphorylation	101	0.25127	180549709419061	0.00244229	0.0407218	0.0347677	6282	tags=60%, list=43%, signal=35%	817/28996/2039/7225/8476/219736/2932/22853/8312/9730/5528/801/27347/5170/84630/90/1111/51422/5585/5594/199731/9578/11113/1020/3093/91/5566/388228/5604/200734/117854/161742/10114/143941/65125/2475/8767/1859/8658/983/5587/9475/808/1609/6093/9943/1457/1950/51719/4294/2011/7048/207/51701/10253/5599/7443/5580/56288/5591/7040
GO:0019216	regulation of lipid metabolic process	247	0.20981	182078154024984	0.000229267	0.00733785	0.00626496	5048	tags=47%, list=34%, signal=31%	5165/7410/10580/5747/3417/2053/83752/32/949/55626/6653/6714/9971/5140/3638/23038/1717/57761/5163/3667/7067/158219/21/6777/1374/8611/84649/338/85414/64784/2330/9110/476/51280/5525/128486/5468/60481/51141/4067/157506/153090/55198/340895/8898/10451/64801/5465/9611/23175/3172/10162/2168/8897/339221/51422/57406/9926/2181/9104/8720/64919/9563/80207/2784/5467/131118/51085/2147/9965/8396/51360/221395/282…
GO:0019674	NAD metabolic process	24	0.477902	223974752633944	0.000747289	0.0168488	0.0143853	3330	tags=62%, list=23%, signal=48%	23475/5214/5213/221937/3939/2023/23171/5106/229/2819/3607/4190/2820/8604/5211
GO:0022600	digestive system process	65	0.301888	19211636622182	0.00335797	0.0488265	0.0416874	2894	tags=42%, list=20%, signal=33%	80168/2169/6523/949/48/8435/51474/6518/64081/7421/2035/5357/7442/57482/27347/10162/2168/339221/9245/29881/1645/113235/7429/6584/1582/50848/7032
GO:0022613	ribonucleoprotein complex biogenesis	418	-0.299059	-300997958715306	0.000359176	0.666749	0.569262	4828	tags=50%, list=33%, signal=35%	8894/3921/9326/6208/10856/6125/4839/6165/545/11051/121053/84881/6193/6194/102724159/64794/51388/6134/6128/6201/55011/6209/54505/55226/6234/25879/1654/92345/79922/192669/10659/92342/91695/55178/84294/55299/5394/81875/10438/8175/90121/6175/11224/6223/6129/4686/7375/10514/7536/51081/6217/55794/79050/10775/6880/55153/8663/705/26121/9092/11052/54555/105378616/6232/51202/6059/23451/51340/83732/6628/510…
GO:0022618	ribonucleoprotein complex assembly	182	-0.29736	-259403077515321	922292	1.09282e+08	9.33033e+07	5160	tags=54%, list=35%, signal=35%	22907/6635/7458/120379/22827/57461/4809/8662/8894/3921/9326/6208/10856/6125/4839/545/11051/121053/6193/102724159/6134/6128/55011/6209/54505/6234/92345/192669/10659/91695/55299/8175/6175/6223/4686/7375/7536/51081/55794/6880/8663/26121/9092/11052/105378616/6232/23451/51340/6628/26284/11171/6169/83640/51154/1939/8669/8996/56949/54475/23020/10594/9733/10181/6152/29777/23521/101954267/5433/10946/6147/…
GO:0030048	actin filament-based movement	95	0.268559	191582868165841	0.00138983	0.0265979	0.0227089	5437	tags=55%, list=37%, signal=35%	4645/817/776/23327/4642/644150/287/4643/79784/274/10142/7456/476/55930/4640/57669/23171/6640/4646/7134/4648/1739/81/4430/57698/6717/6331/140465/4628/7429/2626/4627/5290/4650/3757/54795/5318/4641/783/9722/2258/3760/54874/440193/10008/2934/3728/8976/29098/1824/51168/3752
GO:0031497	chromatin assembly	91	-0.343432	-252501775085468	2.61335e+08	0.000165383	0.000141202	3047	tags=46%, list=21%, signal=37%	3021/11176/3148/3007/8347/85236/128312/83743/9733/121504/3020/8356/23378/6418/3014/3146/26155/8344/3006/8341/144108/29855/23270/440689/8349/54623/7259/7157/23234/8362/6046/8364/256329/23411/8357/8367/8345/3017/8365/8353/8339/64061
GO:0031645	negative regulation of nervous system process	11	0.674224	231749500104487	0.000130694	0.00454897	0.00388385	4742	tags=82%, list=32%, signal=55%	26022/8898/9896/23175/1075/5728/2859/784/27242
GO:0031667	response to nutrient levels	379	0.165548	155522967386229	0.00292315	0.045986	0.0392622	4232	tags=37%, list=29%, signal=27%	65084/8648/594/445/58528/847/6532/2155/6753/32/353500/65985/23530/1373/1611/6653/8942/6714/9971/6751/7421/659/255738/27072/664/8428/6652/1374/7298/10991/6721/6513/19/7442/38/28960/221937/3939/5313/55062/210/3992/5723/383/2621/5468/1956/5106/9131/5251/122622/2308/220441/7494/4968/8805/3157/55198/23367/3651/7481/2538/5465/4976/23235/5610/1312/8897/51422/3607/9474/4217/5595/2181/5594/2182/4303/6581/…
GO:0032231	regulation of actin filament bundle assembly	83	0.271215	18589568063136	0.00298854	0.046223	0.0394646	5789	tags=59%, list=39%, signal=36%	51466/55604/23332/5058/1902/5217/9788/55160/84952/7481/23370/4771/116985/4088/5345/25/79822/85358/11346/5295/7429/55616/50848/8500/29109/6281/387/7840/2475/3984/123016/10979/5062/55607/9475/5962/4233/6093/10174/7043/2041/23122/8195/90102/7984/5879/7168/71/23075
GO:0032288	myelin assembly	20	0.516978	224310278707136	0.000515152	0.0133436	0.0113926	2564	tags=50%, list=17%, signal=41%	7097/287/23136/400746/8898/9896/64398/7368/928/8443
GO:0032528	microvillus organization	24	0.460097	21563028633889	0.00134569	0.0259312	0.0221397	5106	tags=71%, list=35%, signal=46%	5337/5357/5205/9368/51735/4640/5909/10083/7429/9693/83715/54825/23043/7430/5781/53841/688
GO:0032784	regulation of DNA-templated transcription, elongation	49	-0.344117	-210561724151649	0.00135318	0.0259857	0.0221863	5010	tags=59%, list=34%, signal=39%	1499/9984/2074/165918/27336/2146/5457/11143/284695/10189/55837/3192/6469/85403/2962/3150/6919/905/8861/9400/57805/11198/6829/7936/904/8812/10614/6830/7919
GO:0032787	monocarboxylic acid metabolic process	464	0.299534	292492143894824	4.32765e-05	0.120503	0.102884	4988	tags=54%, list=34%, signal=37%	39/5165/5236/3033/11001/3643/51390/9942/56898/51084/2948/3417/5066/83752/55825/79993/3034/32/6718/5096/18/55902/65985/1593/2203/80221/1244/8942/5740/9971/6319/26031/56922/3638/23038/54677/57761/5163/1573/3667/84532/1666/2938/56624/114876/26090/25874/2821/2628/957/8309/1374/84649/85414/1557/31/25953/7915/197322/6822/79799/5214/38/6307/5213/221937/5205/3939/5313/2023/22949/158584/253017/3992/113612…
GO:0032868	response to insulin	217	0.295995	251741543667957	352926	4.67964e+06	3.99541e+07	5667	tags=59%, list=39%, signal=37%	7097/29904/8743/5786/3033/3643/252983/847/10580/5590/9847/2650/6653/896/6714/5140/3638/23038/57761/6272/3667/5058/255738/1176/2241/23516/140710/139596/2932/339/6513/3795/6599/5313/23189/5468/2549/5106/2308/51141/7494/4690/4067/55198/23191/114882/2538/5465/4976/5170/23235/23175/3030/8412/5771/26060/6121/4303/2058/84327/3480/5295/5207/2885/2690/54832/4218/132864/3416/5315/80339/8396/2822/27131/2343…
GO:0032869	cellular response to insulin stimulus	171	0.333255	272143294957499	44811.3	8.60531e+06	7.34709e+06	5667	tags=63%, list=39%, signal=39%	29904/5786/3643/252983/10580/5590/9847/6653/896/6714/5140/3638/23038/57761/3667/5058/255738/1176/2241/23516/140710/2932/339/6599/5313/23189/5468/2549/5106/2308/51141/7494/4690/55198/23191/114882/2538/4976/5170/23235/23175/8412/5771/26060/6121/4303/2058/3480/5295/2885/2690/4218/132864/3416/5315/80339/8396/2822/27131/23433/5290/5728/6772/142/5164/79746/183/10014/94056/64710/55667/4641/5167/324/2771…
GO:0032870	cellular response to hormone stimulus	451	0.222434	216586583529858	1.65995e+06	1.76498e+08	1.50692e+08	5244	tags=49%, list=36%, signal=33%	29904/23081/6256/5786/8648/3643/7292/252983/7068/445/10580/199/5590/6753/9847/5747/5618/2782/9063/1373/6653/1244/896/6714/5140/3638/6751/23038/57761/3667/133522/7067/5058/255738/1176/10499/55915/2241/23516/140710/8091/6777/2932/339/8611/406/338/11240/31/4734/6599/55532/476/2104/5313/55325/678/383/57178/23189/89766/2627/5468/1956/2549/5106/9131/5251/2308/51141/3169/7494/7490/8805/4690/4067/3157/25…
GO:0033500	carbohydrate homeostasis	188	0.221684	181881246394575	0.000292406	0.00866176	0.0073953	4044	tags=43%, list=28%, signal=31%	7447/5165/3643/252983/6934/65985/54097/9971/91942/90550/4041/3667/55144/23516/25874/2821/1080/4035/5213/221937/5530/5836/2621/26056/133308/5468/9324/5106/2308/283450/3169/7494/55198/3651/64282/2538/4976/3172/3607/7466/55450/2030/6755/6717/5771/3480/5295/8609/1050/55777/10497/9230/5467/3767/2626/5566/5894/6598/9024/51085/5727/6597/221395/2822/6659/5290/25942/2646/3745/5164/54795/55638/9854/64710/8…
GO:0034219	carbohydrate transmembrane transport	91	0.295264	206752574690494	0.000359104	0.0102033	0.00871144	5641	tags=60%, list=38%, signal=37%	200010/115584/3643/155184/252983/6523/26503/56606/10580/9847/6518/91749/6514/55314/57761/6272/3667/144195/85414/6513/9962/9963/55198/114882/51422/1432/7525/26060/5906/5295/5467/673/9965/23433/4205/23596/6524/5167/148808/1389/10999/208/100506658/8218/6927/5781/5584/79602/8660/6526/55022/388581/6814/55829/207
GO:0034329	cell junction assembly	287	0.18562	165168855036463	0.00114793	0.023503	0.0200666	4397	tags=40%, list=30%, signal=28%	7097/29904/143098/8502/5786/5796/5795/10580/83660/613/287/5747/8934/8874/6714/4038/2555/22883/2705/2039/23332/10207/3987/26047/87/10686/8777/23136/4035/6712/2889/1495/92140/10160/64284/57669/10611/1308/10420/1739/1004/7481/8642/5170/999/79977/59272/27020/60/4088/23396/25/9075/57622/57463/2335/222256/85358/7336/9076/6259/5906/1020/7368/4204/928/3551/9693/5566/91862/8443/23603/266977/50848/23499/79…
GO:0034330	cell junction organization	485	0.18576	183553007372271	2.60581e+09	0.00120931	0.00103249	5348	tags=45%, list=36%, signal=30%	7097/29904/26037/143098/8502/5786/3643/55906/5796/5795/9922/10397/10580/83660/8650/144100/613/287/5747/288/8934/5792/6505/8874/6714/4038/10982/2555/22883/2705/2039/23332/10207/3987/57549/79012/118/9788/1605/26047/87/10686/8777/4734/23613/23136/4035/2131/3706/6712/2889/1495/92140/10160/64284/2064/57669/5663/10611/26059/6640/8495/1308/29841/10420/2534/1739/153090/1004/23191/7481/27134/8898/8642/497…
GO:0034379	very-low-density lipoprotein particle assembly	11	0.57856	198867140450943	0.00308816	0.0471236	0.0402335	6191	tags=100%, list=42%, signal=58%	8435/338/4547/10162/2181/84879/345/375/8694/6646/341
GO:0034728	nucleosome organization	105	-0.269901	-206183060003735	0.000273048	0.00826415	0.00705582	3047	tags=40%, list=21%, signal=32%	3021/3159/3148/3007/8347/85236/128312/83743/9733/121504/3020/8356/6418/3014/8344/3006/8341/144108/29855/23270/440689/8349/54623/7259/23234/8362/11198/10467/6046/6603/8364/10847/8357/8367/8345/6830/54107/3017/8365/8353/8339/64061
GO:0034764	positive regulation of transmembrane transport	146	0.27472	213791147259616	2.38884e+08	0.00114685	0.000979166	5764	tags=59%, list=39%, signal=36%	57158/3643/6786/10580/287/9847/288/9446/5174/196527/3667/7225/2745/3064/1080/10142/1756/9368/5663/1785/30819/801/481/27347/114882/81/5170/59272/57620/65268/1432/25/3460/57463/9104/6717/1908/85358/26060/5906/6536/1020/5295/3767/673/51703/2147/9965/84334/2631/23433/65125/3757/183/5335/113451/4205/23596/27092/1389/11261/783/208/100506658/9722/2180/808/8218/784/1520/5781/5584/10008/79602/6271/8660/63…
GO:0035592	establishment of protein localization to extracellular region	268	0.185413	163041803187334	0.00165408	0.0302019	0.0257859	4063	tags=37%, list=28%, signal=27%	7097/7447/3033/252983/5125/6934/9066/5066/353500/18/65985/54097/9971/91942/2039/90550/4041/3667/9727/64215/25874/1374/1080/406/6928/818/19/4035/5213/5530/3382/26056/4547/133308/9324/1956/8431/5106/64083/4253/399687/9545/79158/3651/51768/3172/283/2746/55450/6755/2182/6717/51124/80223/26297/50855/4628/8609/10497/4087/9230/4218/5467/3767/84976/5894/3418/9024/27236/10972/2822/3717/173/114899/79971/84…
GO:0036314	response to sterol	27	0.481228	235679463181139	0.000501595	0.0131763	0.0112498	2876	tags=56%, list=20%, signal=45%	57476/2155/65985/3638/1605/6608/19/51141/3157/10654/4040/4087/5727/1582/2822
GO:0036315	cellular response to sterol	18	0.516378	215024400611397	0.000805223	0.0177158	0.0151255	2876	tags=61%, list=20%, signal=49%	57476/65985/3638/1605/6608/19/51141/3157/4040/5727/2822
GO:0038096	Fc-gamma receptor signaling pathway involved in phagocytosis	20	0.528864	229467508354682	0.000286979	0.00854645	0.00729684	2215	tags=65%, list=15%, signal=55%	7410/5795/5747/6714/5058/4067/2534/55198/10451/25/7525/26060/5906
GO:0040008	regulation of growth	492	0.15708	155502824245366	0.00259789	0.0424271	0.0362237	4858	tags=41%, list=33%, signal=28%	114804/817/57446/2786/1002/3643/51196/23327/9686/51754/5795/6532/10516/27346/32/127833/2203/56994/657/22883/8455/23678/5058/659/10495/23677/4853/8091/6777/2932/23286/5925/51542/56649/6608/5357/23136/4035/1808/2023/978/2064/80736/5607/6414/2621/9730/2627/9175/9826/1956/57715/9962/7086/22902/8879/1785/10500/10235/7490/7049/57609/153090/23191/7481/200845/51760/5465/10477/28982/3172/6792/6197/7466/14…
GO:0042180	cellular ketone metabolic process	162	0.225901	181160800792317	0.00121975	0.0244327	0.0208603	5641	tags=52%, list=38%, signal=32%	5165/9056/83752/32/8942/9971/3638/23038/57761/5163/3667/154807/6777/1374/84649/85414/25953/57107/873/5468/60481/51141/157506/55198/10327/2819/340895/5465/9611/1646/1312/2168/51422/9926/9104/1645/2820/493/9563/10229/5467/51085/3029/9965/9612/8574/127/8644/56267/5164/2475/10295/2806/10901/10062/23590/5978/337/22937/2264/1181/208/9946/84879/27235/10613/1609/4836/7167/219743/79934/1586/8660/345/16076…
GO:0042255	ribosome assembly	57	-0.314181	-202163690402421	0.0027162	0.0437182	0.037326	4815	tags=56%, list=33%, signal=38%	3921/6208/6125/4839/6193/102724159/51388/6134/6128/6209/54505/6234/1654/91695/55299/6175/6223/51081/55794/6232/51001/26284/6169/51154/54475/6152/29777/6147/56342/64963/27341/51119
GO:0042398	cellular modified amino acid biosynthetic process	39	0.423317	229527165833388	7.54917e+09	0.00285995	0.00244179	3005	tags=51%, list=20%, signal=41%	6505/501/55217/1152/2628/9791/55349/8424/4522/200895/10588/4258/2643/34/1719/2593/3029/223/5359/471
GO:0042552	myelination	106	0.254684	185771635271299	0.0021159	0.0368233	0.0314392	4757	tags=48%, list=32%, signal=33%	7097/8537/4155/10397/287/8455/152189/6497/51090/1605/163175/23136/26022/114569/2064/83742/400746/443/1739/6334/23191/8898/9896/84668/23175/79152/7851/57463/64398/4763/7368/928/8443/1075/9334/10939/5728/8604/2475/53616/5534/7038/208/745/20/3766/256987/55331/2068/27242/81846
GO:0042953	lipoprotein transport	11	0.583394	200528775589111	0.00267868	0.0434915	0.0371324	1219	tags=55%, list=8%, signal=50%	4481/8029/338/4035/4547/5468
GO:0043087	regulation of GTPase activity	269	0.216397	190318859609774	8.27598e+09	0.00305225	0.00260597	5883	tags=53%, list=40%, signal=32%	26037/8502/23094/7410/9922/57186/29/57706/163486/613/5747/7813/143872/868/25771/8874/10982/23216/3987/5910/23677/10154/23102/2932/85440/408/23232/121512/57580/2889/6251/57533/51735/125058/2064/5909/23061/129049/23329/10565/253959/10235/153090/7481/10451/23637/55357/6792/116985/202243/89846/8412/54885/93627/9910/9104/51429/255520/9236/4763/55785/5906/94134/9712/8831/23108/6359/9693/132864/9905/797…
GO:0043270	positive regulation of ion transport	169	0.236323	190875326530393	0.000387628	0.0108477	0.00926165	5764	tags=54%, list=39%, signal=33%	8573/57158/776/6786/154043/6532/287/288/9446/5174/18/196527/5608/7225/2745/3064/3958/22925/4638/1080/10991/10142/1756/9368/23171/5663/1785/1230/1739/30819/801/481/27347/81/5170/59272/57620/65268/7466/25/3460/57463/9104/6717/1908/6331/85358/6536/162514/1020/3767/8723/2147/84334/84876/2631/56848/409/65125/5652/3757/183/5335/27092/8398/5318/490/11261/783/9722/5025/808/1051/5155/784/1520/10008/6845/6…
GO:0043413	macromolecule glycosylation	185	0.248257	203184372441934	4.66689e+09	0.00186978	0.00159639	5445	tags=54%, list=37%, signal=34%	2590/2530/4249/11320/2650/4121/84750/2683/2591/200424/84899/91949/10402/338596/11226/957/80312/6480/2589/123264/2651/4124/93010/4248/63917/2131/2132/124872/145173/5663/10317/2524/282679/10565/79796/256435/55568/22906/2673/9245/9215/79695/199857/29071/51465/10905/57134/7423/4351/23509/2137/201595/8869/256281/84002/5238/11041/9334/56913/79087/57171/84061/84197/8702/84752/5373/286148/84892/4247/6184…
GO:0043462	regulation of ATPase activity	39	-0.344559	-196100994658325	0.00338158	0.0490418	0.0418712	3337	tags=49%, list=23%, signal=38%	11345/8775/7140/79609/7139/6625/10598/482/26092/7169/51726/26097/5018/51025/163590/3300/7248/23234/130872
GO:0043547	positive regulation of GTPase activity	193	0.228461	187911747414392	0.000153547	0.00527842	0.00450665	3340	tags=37%, list=23%, signal=29%	26037/8502/23094/9922/57186/29/57706/163486/613/7813/143872/25771/8874/10982/23216/3987/5910/23102/2932/85440/23232/57580/2889/6251/57533/51735/125058/2064/5909/23061/129049/23329/253959/10235/7481/23637/55357/6792/116985/202243/8412/54885/93627/9910/9104/51429/255520/4763/5906/9712/23108/6359/9693/9905/79774/23603/23161/64411/55616/26084/50848/375790/112574/6281/4649/4594/4301/7052/6358/57589/50…
GO:0044057	regulation of system process	342	0.165171	152280363607381	0.0029414	0.0460131	0.0392854	4790	tags=41%, list=33%, signal=28%	817/776/51196/7068/9569/1889/199/5590/287/9446/143872/6505/18/84193/6714/1573/7067/5058/659/2035/1605/818/274/23613/7442/10142/4634/26022/476/5530/2023/1756/9368/84866/23171/2621/400746/255743/1956/6640/84676/2308/7134/1739/30819/801/481/27347/55151/8898/9896/5465/4660/23175/59272/10162/1312/339221/340481/4088/157378/10398/11343/2643/6717/1908/6331/54434/85358/7528/22839/493/4204/10497/79041/2626…
GO:0044106	cellular amine metabolic process	76	0.312001	207775852674103	0.000460225	0.0124594	0.0106376	4266	tags=53%, list=29%, signal=38%	27284/4128/9056/23446/5053/1119/4129/6505/18/1644/1244/8942/9971/501/25953/55349/6817/3176/1312/284161/538/2643/6581/493/4204/27163/222236/79814/1610/51573/6611/4881/3251/113451/10295/26/112483/196743/4946/23498
GO:0044282	small molecule catabolic process	315	0.350685	318473775046299	3.43021e-07	0.0191029	0.0163098	4977	tags=59%, list=34%, signal=40%	27284/39/2731/23576/3033/130589/594/11001/51390/4329/27165/26275/9942/56898/64080/6470/3632/2530/5053/5860/23475/83752/3034/32/6718/949/5096/18/221/1593/80150/84750/8942/51733/123688/56922/54677/4041/3667/1666/51071/6652/1428/3081/339/8309/1374/6783/84706/25953/2710/7915/197322/6822/5214/38/7498/5213/221937/2023/978/11165/646625/383/4143/8821/549/2524/3295/10380/2098/443/80724/5106/6817/217/5226/…
GO:0044283	small molecule biosynthetic process	442	0.251434	243984237729616	5018.67	1.03515e+06	883795	5047	tags=50%, list=34%, signal=34%	5236/56952/11001/27165/445/6470/2948/5053/5860/55825/79993/32/6718/5832/4259/18/55902/65985/1593/1373/5092/2203/8942/51733/5740/9971/6319/26031/3638/23038/1717/57761/84532/50814/56624/4507/114876/23516/4047/140710/55304/6652/2821/2628/162417/1080/84649/338/10165/85414/31/1718/197322/10682/3706/6307/57486/5313/57107/4598/57001/253017/3992/873/127281/5723/3158/241/8566/2222/4522/132/60481/5230/7907…
GO:0046185	aldehyde catabolic process	12	0.662809	238010043524567	0.000202382	0.00670873	0.00572783	4015	tags=83%, list=27%, signal=61%	221/25953/2098/10327/128/112817/64902/3029/127/57026
GO:0046326	positive regulation of glucose import	29	0.440872	219824519544486	0.000430355	0.0118451	0.0101132	5641	tags=76%, list=38%, signal=47%	3643/10580/3667/114882/1432/26060/5906/5295/9965/23433/4205/23596/1389/208/100506658/8218/5781/5584/79602/8660/388581/207
GO:0046394	carboxylic acid biosynthetic process	243	0.278775	240892831655892	668701	8.46362e+07	7.22613e+07	4977	tags=52%, list=34%, signal=35%	11001/27165/445/6470/2948/5053/55825/79993/32/6718/5832/4259/18/55902/1593/1373/5092/8942/51733/5740/9971/6319/26031/3638/23038/57761/84532/56624/4507/114876/2628/162417/85414/31/197322/5313/253017/3992/873/127281/5723/241/4522/60481/79071/22928/51141/7494/201562/6342/216/157506/10327/340895/47/11332/200895/79152/51422/2746/84696/9926/9885/2181/11343/4258/51144/9524/9104/4048/112817/64902/114883/…
GO:0046395	carboxylic acid catabolic process	204	0.344187	288373461588241	136.978	42379.4	36182.9	4977	tags=58%, list=34%, signal=39%	39/2731/23576/3033/594/11001/51390/4329/27165/26275/9942/56898/6470/5053/5860/23475/83752/3034/32/6718/5096/18/80150/8942/123688/56922/54677/3667/1666/1428/3081/8309/1374/84706/7915/197322/6822/38/383/4143/549/3295/443/80724/5106/5226/3176/6342/10327/8310/5465/1384/1962/64087/23175/2168/2746/84696/3030/10588/2184/283927/112817/64902/34/493/191/11112/10840/144193/2108/55862/5467/26061/2747/2110/49…
GO:0046434	organophosphate catabolic process	132	0.253724	193797169810173	0.000533002	0.0135759	0.0115909	4211	tags=47%, list=29%, signal=34%	55512/3632/5151/3417/949/51733/51071/26090/9588/957/38/7498/955/5141/11165/23171/128486/8821/10380/4968/953/3613/2819/22876/8898/11332/27124/339221/284161/8871/57406/123745/25939/27293/53343/283927/9615/222236/3990/79077/5152/51573/11164/57089/25961/5728/23659/3251/5169/5335/55276/254552/100/8398/3633/5167/4952/22978/54928/57026/10924/10591
GO:0048477	oogenesis	61	-0.317309	-208513643446464	0.000735555	0.0167881	0.0143335	3670	tags=48%, list=25%, signal=36%	5764/22932/64848/8085/268/51087/4292/9665/9319/340719/4882/891/3074/259266/3625/9985/2069/4192/79670/675/8549/6795/100125288/994/56339/91603/91746/2067/2661
GO:0048858	cell projection morphogenesis	447	0.160804	156067586188325	0.00181029	0.0323185	0.0275931	4883	tags=40%, list=33%, signal=28%	29904/26037/114804/4756/4891/1002/1600/23242/23327/219699/6383/8650/5590/5747/288/51473/127833/51347/26053/23303/348110/8874/6714/4038/51062/7225/5058/659/57549/4853/2909/10154/6239/84062/25987/2932/1605/85440/26047/8997/11252/2016/4734/6608/23136/4035/2131/3706/1808/5530/22853/10160/2064/23189/5663/10611/9175/1956/57715/9962/22902/1785/10500/57609/2534/10787/153090/51299/23191/22903/6683/51760/4…
GO:0050708	regulation of protein secretion	199	0.215101	178623865073714	0.000685384	0.0158378	0.0135221	3941	tags=40%, list=27%, signal=29%	7097/7447/3033/252983/6934/9066/5066/353500/18/65985/9971/91942/90550/4041/3667/9727/64215/25874/1374/1080/406/4035/5213/5530/3382/26056/133308/9324/1956/8431/5106/64083/399687/3651/51768/3172/283/2746/55450/6755/2182/6717/51124/80223/26297/50855/4628/8609/10497/5467/3767/84976/3418/9024/27236/10972/2822/3717/114899/79971/6659/5481/3745/5211/23607/382/10062/54795/55638/9575/55204/7260/9854/10961/…
GO:0050830	defense response to Gram-positive bacterium	46	-0.355179	-211731603718058	0.000965901	0.020539	0.0175359	2974	tags=48%, list=20%, signal=38%	4615/3148/3569/8347/5320/85236/129530/3592/6170/4153/84868/1969/8344/3105/6992/8349/7124/284297/4049/3133/4069/8339
GO:0050892	intestinal absorption	32	0.548175	28157440486333	8.12831e+07	5.4538e+09	4.65638e+09	2811	tags=66%, list=19%, signal=53%	80168/2169/6523/949/48/8435/51474/6518/7421/2035/5357/10162/2168/339221/9245/29881/1645/113235/7429/1582/50848
GO:0051028	mRNA transport	117	-0.293558	-231148181289861	1.16385e+09	0.000623219	0.000532096	5067	tags=56%, list=35%, signal=37%	84248/9883/84271/10642/5976/9984/7175/1070/9972/3087/55308/143244/3800/56648/65110/8888/4116/29890/25909/4686/55795/23279/10189/7884/23381/5903/79902/22794/55916/4927/8086/84324/8570/7538/2332/65109/23049/1984/53371/5433/10212/7514/9775/8480/26097/54888/677/55421/6426/26993/23511/22916/56943/9818/9939/2733/8106/100101267/6432/91746/10762/79228/6830/7919/10482
GO:0051046	regulation of secretion	432	0.176706	170419576979575	0.000309146	0.00906122	0.00773635	4969	tags=43%, list=34%, signal=29%	7097/8573/7447/55512/55784/3033/140730/10079/252983/6532/6934/9066/5066/4129/127833/353500/18/65985/1244/9971/91942/5608/55288/90550/4041/3667/23332/9727/64215/22925/2241/25874/84062/2932/2065/1374/1080/406/23413/25953/7442/4035/5213/5530/9368/3382/29091/26056/57586/133308/9324/1956/5873/4646/8431/5106/64083/399687/9545/85477/7494/9783/4067/801/3651/27347/51768/51760/5170/3172/283/1312/41/2746/55…
GO:0051051	negative regulation of transport	311	0.178012	160047336155801	0.00177664	0.0319164	0.0272498	5707	tags=48%, list=39%, signal=30%	7097/817/7447/337867/3033/10079/23327/288/9446/4129/353500/11060/18/146722/91942/3638/2039/3667/9727/255738/3958/22925/2065/10550/25953/11252/8501/6721/274/4734/29934/5530/9368/51684/401152/29091/26056/55198/801/23191/27347/8898/91404/1312/8724/41/65268/9474/538/27248/6717/51465/7879/26060/80223/5906/6536/84079/26297/1020/192683/8609/3767/3418/27236/7032/6311/7341/5359/90678/3162/160140/5728/1408…
GO:0051056	regulation of small GTPase mediated signal transduction	251	0.212947	185581791159142	0.000216239	0.00700136	0.00597767	4032	tags=39%, list=27%, signal=29%	26037/23094/7410/51196/9649/9922/57186/29/57706/23362/613/9828/143872/26053/2203/23229/6714/93663/10982/5291/1902/4853/2909/79109/408/8997/56990/121512/23096/19/23092/57580/55160/8729/9289/5909/221178/23189/285282/11214/9826/55701/10565/9265/1785/253959/117178/84952/153090/10451/23550/55914/23370/55200/50619/116985/202243/89846/199731/6453/25/79822/23365/64283/57480/94134/8831/23108/10260/23263/5…
GO:0051447	negative regulation of meiotic cell cycle	13	-0.581533	-213524813325068	0.00113125	0.0232471	0.019848	5719	tags=92%, list=39%, signal=56%	3976/26271/1843/6196/5017/7272/5567/286151/9319/4882/5573/55743
GO:0051494	negative regulation of cytoskeleton organization	124	0.238821	180183151381311	0.00221316	0.0379234	0.0323785	6492	tags=60%, list=44%, signal=34%	55604/4281/51474/348110/8874/2039/23332/5217/118/832/57482/120/6712/23189/10565/85477/84952/85464/23370/27124/116985/79822/4682/56890/54434/85358/5295/7429/157922/6711/55755/4869/4591/6840/253725/50848/163782/8500/5290/51571/10300/822/1859/324/5062/55607/50853/2258/256949/5962/4233/50810/26586/23122/146057/8195/57551/2934/90102/24139/8850/23075/899/2288/57731/100505385/5580/2059/10297/6709/85415/…
GO:0055086	nucleobase-containing small molecule metabolic process	465	0.281096	27498244644338	0.00266009	24.6901	21.0801	5055	tags=54%, list=34%, signal=36%	27284/8573/5165/5236/56952/3643/4329/8801/55711/53354/56474/6470/2530/8226/5151/23475/8459/115/79993/32/4354/55902/1373/2203/8460/80221/8942/51733/5740/7371/9061/54677/5163/84532/2745/9060/51071/4507/25874/139596/2821/957/339/7298/6783/84649/10165/31/197322/6822/5214/38/205/7498/1836/955/5213/221937/3939/5313/2023/978/124872/5141/4598/11165/646625/4967/3158/80146/128486/5663/79631/260425/8034/452…
GO:0055088	lipid homeostasis	125	0.257413	194534124053672	0.000323932	0.00944491	0.00806394	5906	tags=58%, list=40%, signal=35%	57476/2053/27346/949/8435/51474/148534/9971/3638/4041/255738/158219/21/25987/8309/84649/338/31/6721/19/23461/3694/285848/128486/4547/5468/7494/433/340895/8310/2538/2494/3172/339221/7851/1645/57143/22913/1050/51085/3990/80339/114899/2646/84647/29099/10062/79575/10087/2055/57678/26119/7392/337/2264/9975/20/6296/123876/5424/8660/345/8228/79850/6095/94103/5562/205251/51129/8694/116150/6646/1581
GO:0060413	atrial septum morphogenesis	10	0.676071	222551466911383	0.00047498	0.012596	0.0107543	3012	tags=80%, list=21%, signal=64%	659/4853/6608/161882/7468/90/2626/6659
GO:0060612	adipose tissue development	31	0.43198	219852671170581	0.000508258	0.0132708	0.0113304	3678	tags=61%, list=25%, signal=46%	285590/9658/65985/6653/4041/84649/38/89766/7494/11145/9517/8609/5467/139285/79068/1386/5290/84159/54795
GO:0065004	protein-DNA complex assembly	136	-0.261412	-211901979554165	5.597e+09	0.00214963	0.00183533	3551	tags=41%, list=24%, signal=32%	1063/6880/5706/5893/1062/6878/3021/11176/201254/3148/3007/8347/1058/85236/7343/128312/83743/55290/9733/121504/1810/2959/64425/3020/80152/8356/6418/3014/6908/3146/6883/8344/3006/8341/144108/29855/23270/440689/8349/7259/7157/9013/23234/8362/6046/8364/79003/8357/8367/8345/54700/3017/8365/8353/8339/64061
GO:0070085	glycosylation	196	0.241186	198695446458892	3.42821e+09	0.00152734	0.00130402	5445	tags=54%, list=37%, signal=34%	2590/2530/4249/11320/2650/4121/84750/2683/2591/200424/84899/91949/10402/9488/93183/338596/11226/957/80312/6480/2589/123264/2651/4124/93010/4248/63917/2131/2132/124872/145173/5663/10317/2524/57511/282679/10565/79796/256435/55568/22906/2673/9245/9215/79695/199857/29071/51465/10905/57134/7423/4351/23509/2137/201595/8869/256281/84002/5238/11041/9334/56913/79087/57171/84061/84197/8702/84752/5373/28614…
GO:0070542	response to fatty acid	52	0.319221	194222850258139	0.00245371	0.0407903	0.0348262	5157	tags=58%, list=35%, signal=38%	7097/2731/5165/445/847/65985/1373/6714/9971/6319/3667/1374/84649/210/2308/51141/3651/1646/1645/9076/8443/8644/2309/5536/2180/1385/6602/79602/55022/6720
GO:0070588	calcium ion transmembrane transport	190	0.221392	182157048083321	0.000658881	0.0154823	0.0132186	5070	tags=49%, list=35%, signal=32%	817/57158/79085/10367/776/6786/287/9446/196527/57685/90550/7225/3064/57113/140803/23413/274/7442/8416/1756/140738/401152/2621/159371/5663/4067/2534/27112/801/481/55151/27075/4976/91404/5170/41/57620/9474/8065/9512/25/63933/9104/6717/26133/302/162514/1020/493/79041/5566/2147/309/84876/2631/10939/2905/9254/80228/221154/3710/5335/7416/7531/91689/57190/27092/54822/55636/54795/10681/8398/2185/490/2859…
GO:0070839	metal ion export	31	0.397185	20214358849229	0.00239822	0.0401072	0.034243	5719	tags=68%, list=39%, signal=41%	30061/196527/540/476/159371/1739/30819/801/481/538/493/3757/7531/490/6556/808/10008/8645/483/3752/3954
GO:0071166	ribonucleoprotein complex localization	70	-0.383808	-259286168383152	4.46155e+08	0.000264323	0.000225676	5067	tags=64%, list=35%, signal=42%	84248/84271/5976/9984/7175/3087/55308/6741/6209/8888/29890/4686/55795/23279/55153/26121/10189/6059/23381/79902/4927/84324/23049/5433/10212/7514/8480/26097/54888/5901/26993/65083/51068/56943/7248/2733/8106/55781/91746/79228/6830/161424/7919/55341/10482
GO:0071322	cellular response to carbohydrate stimulus	119	0.237017	178029502873011	0.00229114	0.0386648	0.0330114	3960	tags=44%, list=27%, signal=32%	7447/5165/252983/65985/6518/9971/91942/5608/4041/23516/25874/1080/4035/5530/2621/26056/133308/9324/5106/7494/3651/4976/55450/2030/6717/5603/3480/8609/10497/9230/5467/6416/3767/2626/5566/5894/6598/9024/51085/6597/2822/6659/5290/25942/3745/54795/55638/9854/8398/2309/5105/7776
GO:0071407	cellular response to organic cyclic compound	426	0.177779	171246079344247	0.000481901	0.012719	0.0108593	4506	tags=40%, list=31%, signal=29%	29904/23081/6256/57476/445/4481/199/6532/6753/6505/839/65985/2782/9063/1373/1244/6714/9971/3638/6751/7421/2039/5139/133522/5058/1811/8091/84062/2932/1080/8611/406/1605/10550/11240/64135/8945/4734/6608/19/7442/10142/476/2104/5313/2889/1495/55325/9368/678/116151/383/57178/2767/1956/5106/9131/5251/2308/64083/51141/3169/2230/1785/7490/8805/84458/3157/81606/23367/2819/55151/5465/9611/2908/999/5585/60/…
GO:0071426	ribonucleoprotein complex export from nucleus	69	-0.379237	-256173673851515	2.1558e+08	0.000137996	0.000117819	5067	tags=64%, list=35%, signal=42%	84248/84271/5976/9984/7175/3087/55308/6741/6209/8888/29890/4686/55795/23279/55153/10189/6059/23381/79902/4927/84324/23049/5433/10212/7514/8480/26097/54888/5901/26993/65083/51068/56943/7248/2733/8106/55781/91746/79228/6830/161424/7919/55341/10482
GO:0071692	protein localization to extracellular region	270	0.185987	163400729797505	0.001603	0.0298253	0.0254645	4063	tags=37%, list=28%, signal=28%	7097/7447/3033/252983/5125/6934/9066/5066/353500/18/65985/54097/9971/91942/2039/90550/4041/3667/9727/64215/25874/1374/1080/406/6928/818/19/4035/5213/5530/3382/26056/4547/133308/9324/1956/8431/5106/64083/4253/399687/9545/79158/3651/51768/3172/283/2746/55450/6755/2182/6717/51124/80223/26297/50855/4628/8609/10497/4087/9230/4218/5467/3767/84976/5894/3418/9024/27236/10972/2822/3717/173/114899/79971/84…
GO:0071824	protein-DNA complex subunit organization	171	-0.23113	-197873128860586	0.000109804	0.00387026	0.00330438	3551	tags=39%, list=24%, signal=30%	1063/6880/92815/5706/5893/1062/6878/3021/11176/3159/201254/3148/3007/8347/1058/85236/7343/128312/83743/55290/9733/121504/1810/2959/64425/3020/80152/8356/6418/3014/6908/3146/6883/2960/8344/3006/8341/144108/29855/23270/440689/8349/54623/7259/7157/9013/23234/8362/11198/10467/6046/6603/8364/79003/10847/8357/8367/8345/54700/6830/54107/3017/8365/8353/8339/64061
GO:0071826	ribonucleoprotein complex subunit organization	189	-0.295889	-260890686264453	1.0928e+06	1.26787e+08	1.08249e+08	5160	tags=53%, list=35%, signal=35%	22907/6635/7458/120379/22827/57461/4809/8662/8894/3921/9326/6208/10856/6125/4839/545/11051/121053/1659/6193/102724159/6134/6128/55011/6209/54505/6234/92345/192669/10659/91695/55299/8175/6175/6223/4686/7375/7536/51081/55794/6880/8663/26121/9092/11052/105378616/6232/23451/51340/6628/26284/11171/6169/83640/51154/3831/1939/8669/8996/56949/54475/23020/10594/9733/10181/6152/29777/23521/101954267/5433/1…
GO:0090066	regulation of anatomical structure size	373	0.176497	165594076005352	0.000670583	0.0155603	0.0132852	5657	tags=48%, list=39%, signal=30%	7410/1002/51466/55604/1889/6532/64798/8440/143872/51474/196527/1373/348110/93663/23038/2039/8800/5058/659/84561/5910/5217/2241/2909/118/832/2932/6928/274/5357/4035/57580/2131/57482/2132/120/1808/6712/9368/23189/9175/282679/1956/57715/6640/22902/10565/1785/85477/10500/4690/57609/1739/10787/23191/85464/10451/59272/6792/10083/9474/340481/9873/538/5345/25/79822/57698/2643/2335/51429/1908/54434/9856/8…
GO:0090407	organophosphate biosynthetic process	465	0.279621	273539551558114	0.0448674	35.5725	30.3713	5055	tags=53%, list=34%, signal=36%	56894/5165/51205/53354/1040/5337/56474/8395/9942/23446/3417/1119/23475/154141/27315/115/79993/32/57217/55902/55697/1373/56994/8942/55034/5740/5297/7371/9971/128869/9061/5163/84532/253558/57605/259230/5291/9488/93183/9060/1152/25874/139596/7298/204962/10165/31/2710/197322/38/205/9110/3706/1836/5313/2023/9791/5836/4598/26751/3992/80736/3158/128486/8566/8034/8821/4522/132/55361/60481/10380/8760/7907…
GO:0097164	ammonium ion metabolic process	13	0.557745	203132414590108	0.001719	0.0311532	0.0265982	2954	tags=69%, list=20%, signal=55%	23446/1119/1644/501/55349/3176/538/6581/114781
GO:0097237	cellular response to toxic substance	87	0.272923	188235616172026	0.0016115	0.0298253	0.0254645	6559	tags=66%, list=45%, signal=36%	847/9446/10516/4259/23530/54996/64757/84293/2745/2938/9588/2176/127281/241/2098/216/10327/2168/2936/538/4258/2643/128/4257/51780/1719/2954/127/6648/7001/9429/7296/2944/10715/10935/55607/337/2879/213/373156/26034/10058/2946/84817/55829/114112/5292/51024/51109/50506/7295/2950/3240/4780/10587/5052/348
GO:0098659	inorganic cation import across plasma membrane	58	0.314657	195088233612952	0.00110956	0.0229708	0.0196122	4360	tags=55%, list=30%, signal=39%	6523/84561/23516/7442/476/261729/2534/1739/27112/481/6549/65268/1317/6536/162514/493/57181/3767/6550/3077/10479/65125/3757/9990/10723/54795/10060/6524/7779/3773/3766/3760
GO:0098739	import across plasma membrane	113	0.27153	200183625310701	0.000594799	0.0144648	0.0123498	5215	tags=56%, list=36%, signal=36%	6523/206358/6505/6564/6518/84561/23516/10550/8501/6513/23428/7442/476/261729/9368/5663/2534/1739/27112/481/6549/59272/6533/65268/1317/113235/6536/6573/162514/493/57181/3767/51703/6550/3077/121260/10479/65125/6507/3757/183/9990/10723/54795/10060/6524/2055/6541/7779/3773/208/6583/3766/2180/3760/6582/55244/8660/6526/283375/483/6510/124935
GO:0098771	inorganic ion homeostasis	470	0.216149	211635864576437	718548	6.18123e+08	5.27745e+07	5335	tags=49%, list=36%, signal=32%	817/57158/79085/4756/4891/10367/6786/51196/23327/56898/1356/287/288/9446/121665/30061/48/57217/6505/2782/1244/540/54805/7421/90550/22/84899/7225/9777/84561/5910/1902/3064/664/1811/23516/57113/1152/1080/23413/10686/54757/23428/7442/4035/2131/2132/55532/476/1756/8546/261729/9368/164656/159371/51076/5663/282679/1956/55647/1230/8805/4067/2534/27112/26505/801/481/10989/3163/55151/1657/6549/5745/28982/…
GO:0098813	nuclear chromosome segregation	233	-0.189818	-174629273763617	0.00108266	0.0225819	0.0192801	5272	tags=46%, list=36%, signal=30%	699/57697/8243/10540/55294/197342/1499/10726/283489/80198/23397/9212/9928/4751/7175/8881/64151/9055/7917/146909/2177/11331/55143/57520/7153/990/81930/80010/11004/55166/7273/7272/57820/83540/9493/23126/7320/8697/56984/27175/83903/55795/1063/7517/51434/348654/10460/27183/54921/1062/29781/7756/4292/2072/3192/9113/23172/256126/201254/9319/256364/150465/79980/80218/29945/891/27030/9232/146956/9985/383…
GO:0098876	vesicle-mediated transport to the plasma membrane	127	0.236559	179372228605008	0.0012923	0.0253409	0.0216358	4049	tags=44%, list=28%, signal=32%	10079/57706/163486/288/6505/6653/22883/9727/79958/55770/54536/29934/261729/22853/64284/29091/55610/84440/64083/1785/54520/63971/22876/8724/10311/2181/123745/7879/81609/84079/57724/583/9230/4218/6711/8723/84162/8766/253725/23499/4905/2803/2060/10434/55737/25837/382/55275/55204/9495/7260/163882/10564/91461/160622/9135
GO:0099518	vesicle cytoskeletal trafficking	65	0.313288	199371637907612	0.00167074	0.0304063	0.0259605	5422	tags=62%, list=37%, signal=39%	4645/4642/5590/79443/4643/1176/3064/84062/55930/8546/4640/4646/4648/63971/81/23291/22906/10749/4430/8263/10239/26985/5861/92558/55638/66008/4641/118426/9371/1780/54874/8943/23557/22920/6845/10125/8976/3799/51168/5048
GO:0099587	inorganic ion import across plasma membrane	58	0.314657	195088233612952	0.00110956	0.0229708	0.0196122	4360	tags=55%, list=30%, signal=39%	6523/84561/23516/7442/476/261729/2534/1739/27112/481/6549/65268/1317/6536/162514/493/57181/3767/6550/3077/10479/65125/3757/9990/10723/54795/10060/6524/7779/3773/3766/3760
GO:0099633	protein localization to postsynaptic specialization membrane	10	0.620352	204209620320858	0.00271386	0.0437182	0.037326	3414	tags=70%, list=23%, signal=54%	5590/1605/23096/1739/5906/102/53616
GO:0099645	neurotransmitter receptor localization to postsynaptic specialization membrane	10	0.620352	204209620320858	0.00271386	0.0437182	0.037326	3414	tags=70%, list=23%, signal=54%	5590/1605/23096/1739/5906/102/53616
GO:1901137	carbohydrate derivative biosynthetic process	491	0.227165	225136091506395	62295.9	1.08414e+07	9.25626e+06	5141	tags=49%, list=35%, signal=33%	55512/5165/56952/2590/53354/56474/9942/2530/6934/4249/27315/11320/115/2650/79993/32/4121/55902/51097/55253/84750/3340/7371/9653/128869/2683/2591/26035/9061/5163/84532/200424/84899/91949/10402/659/9488/93183/9060/338596/4507/25874/11226/139596/957/80312/6480/7298/10165/2589/123264/2651/31/2710/4124/93010/197322/4248/63917/38/205/2131/2132/1836/92370/5313/2023/10318/124872/5836/145173/80146/9469/56…
GO:1901568	fatty acid derivative metabolic process	54	0.352483	215087471607382	0.000532175	0.0135759	0.0115909	2225	tags=43%, list=15%, signal=36%	55711/5066/79993/65985/84649/31/197322/38/22949/3158/128486/60481/3295/79071/201562/11332/3248/6576/2181/2182/51144/9524/283927
GO:1901570	fatty acid derivative biosynthetic process	34	0.381391	19904651119688	0.00316814	0.0475562	0.0406028	2025	tags=44%, list=14%, signal=38%	55711/5066/79993/65985/31/197322/3158/60481/79071/201562/6576/2181/2182/51144/9524
GO:1901616	organic hydroxy compound catabolic process	57	0.455343	282383198676913	1.11692e+07	9.01471e+07	7.69664e+08	4015	tags=63%, list=27%, signal=46%	27284/4128/3632/4129/6718/949/221/1593/6652/6783/2710/6822/11165/8821/10380/6817/217/3613/219/8898/27124/1312/256356/8871/2184/2820/127/26007/8644/5728/197257/1594/3633/4952/54928/57026
GO:1901617	organic hydroxy compound biosynthetic process	180	0.300545	245450226819554	4.39793e+06	4.1512e+08	3.54424e+08	4408	tags=51%, list=30%, signal=36%	11001/5053/5860/6718/1593/1644/5092/9971/26031/3638/1717/50814/10826/56624/114876/4047/55304/1080/338/6713/1718/10682/3706/6307/11161/4598/3158/8566/2222/5106/51141/6342/3613/3157/3422/340895/47/64801/5745/10162/51422/9885/3930/538/51478/2643/29881/8720/26060/51744/9517/114883/10654/9563/1719/9693/6697/55163/1727/9965/1582/51360/1610/23600/80270/1001/8644/1497/5825/2224/56848/84105/3707/23596/253…
GO:1901657	glycosyl compound metabolic process	73	0.310004	204668154586754	0.000542647	0.0135759	0.0115909	4993	tags=58%, list=34%, signal=38%	56952/57733/55253/51733/51071/4507/139596/339/7498/978/132/10327/1646/200895/27350/1645/221443/5636/9615/191/10400/10930/7084/8574/2519/8644/471/4833/3251/22875/51251/100/22978/441250/5634/5631/4668/10591/4860/28992/5471/2990
GO:1901699	cellular response to nitrogen compound	492	0.222243	220011942288227	318086	4.32054e+06	3.68882e+07	5667	tags=51%, list=39%, signal=32%	29904/55512/5786/3643/252983/445/58528/6470/10580/199/6532/5590/9847/5747/56034/6505/839/2782/1644/1373/6653/896/6714/9971/5140/3638/23038/57761/2039/3667/5139/5058/255738/1176/23677/1811/2241/23516/140710/84062/6777/2932/339/1080/352954/64135/7442/10142/6599/4035/55532/5313/2889/1495/9368/383/23189/89766/2767/5663/5468/2549/5106/9131/2308/64083/51141/2230/1785/7494/22849/7490/4690/4067/2534/5519…
GO:1903649	regulation of cytoplasmic transport	23	0.513456	235929377548007	0.000209308	0.00685668	0.00585414	5250	tags=83%, list=36%, signal=53%	10079/8934/6653/6714/29934/8898/8724/5595/5594/404636/51652/5604/27236/7874/7260/7430/5962/5605/23317
GO:1904996	positive regulation of leukocyte adhesion to vascular endothelial cell	15	-0.603145	-236244501796868	0.000240431	0.00760774	0.00649538	3657	tags=73%, list=25%, signal=55%	10725/2526/3569/5970/240/6484/4192/3383/7189/7124/2113
GO:1905475	regulation of protein localization to membrane	146	0.274418	213555974922958	2.51391e+09	0.00117823	0.00100596	5756	tags=55%, list=39%, signal=34%	10580/8650/5590/9847/288/5174/6505/4038/2039/5058/5780/3958/1605/123264/23613/5357/23096/4035/2064/5525/1956/2534/1739/5170/60/2181/54434/26060/5906/1020/5295/493/84687/7429/102/3767/6711/54585/23255/8766/8500/23433/3745/10434/8301/382/9495/7430/4641/27113/163882/91461/160622/26119/11261/598/56947/208/27032/10399/2633/163/8417/784/5584/4836/10490/6526/1445/2934/55022/27237/8673/29098/3799/378884/…
GO:1990778	protein localization to cell periphery	282	0.265073	234339734107818	2.80154e+06	2.68996e+08	2.29665e+08	5687	tags=57%, list=39%, signal=36%	10580/8650/5590/287/9847/288/8934/5174/23555/57217/6505/9053/22883/10966/5780/55690/3958/2035/1605/10550/5357/23096/23136/4035/9368/51735/5525/2621/254887/1956/64083/9545/63971/22979/1739/481/25945/8642/84668/5170/10484/999/2037/60/2181/23241/26003/4682/2319/8631/7879/26060/302/64398/5906/1020/5295/583/493/51304/84687/7429/196383/4040/3551/23167/340348/9693/4218/81619/102/3767/6711/54585/145567/5…
